# Supplementary material for: Base-catalyzed stereoselective thiosulfonylation of ynones for the facile synthesis of thio-functionalized vinyl sulfones
Source: Royal Society of Chemistry journal article supplement (doi:10.1039/d2qo01855a), 2023-01-01

## *Supplementary Information for*

### **Base-catalyzed Stereoselective Thiosulfonylation of Yrones for Facile Synthesis of Thio-functionalized Vinyl Sulfones**

*Jinyun Luo, Muze Lin, Dengpeng Xia, Guangfen Du,\* Zhihua Cai, Bin Dai,\* Lin He\**

*Key Laboratory for Green Processing of Chemical Engineering of Xinjiang Bingtuan, School of Chemistry and Chemical Engineering, Shihezi University, Xinjiang Uygur Autonomous Region, 832000, China.*

### **Table of Contents**

|                                                                 |     |
|-----------------------------------------------------------------|-----|
| 1. General Information.....                                     | S1  |
| 2. General procedure for synthesis of products <b>3</b> .....   | S1  |
| 3. Single-crystal X-ray structure analysis <b>3aj</b> .....     | S1  |
| 4. Gram-scale preparation of <b>3a</b> .....                    | S3  |
| 5. Characterization of products <b>3</b> .....                  | S3  |
| 6. Optimization of reaction conditions.....                     | S25 |
| 7. General procedure for synthesis of products <b>5</b> .....   | S26 |
| 8. Single-crystal X-ray structure analysis <b>5j</b> .....      | S27 |
| 9. Characterization of products <b>5</b> .....                  | S28 |
| 10. General procedure for synthesis of products <b>7a</b> ..... | S45 |
| 11. Characterization of products <b>7a</b> .....                | S45 |
| 12. Copies of NMR spectra of products.....                      | S46 |

## 1. General Information

Unless otherwise indicated, all reactions were conducted under air atmosphere in oven-dried glassware with magnetic stirring bar. All other chemicals were obtained from commercial supplies and used as received without any further purification. Column chromatograph was performed with silica gel (200~300 mesh) and analytical TLC on silica gel 60-F<sub>254</sub>. <sup>1</sup>H, <sup>13</sup>C and <sup>19</sup>F NMR spectra were recorded on a Bruker AVANCE III spectrometer (400 MHz, 100 MHz and 376 MHz, respectively). Melting points of the products were measured on a micro melting point apparatus (SGW X-4) and uncorrected. High-resolution mass spectra (HRMS) were obtained on an LTQ Orbitrap XL mass spectrometry equipped with an ESI source from Thermo Scientific at Keecloud Biotech in Shanghai. X-ray diffraction study for product **3aj** and **5j** were carried out on Bruker D8 VENTURE photon II diffractometer with I $\mu$ s 3.0 microfocus X-ray source using APEX III program.

## 2. General procedure for synthesis of products **3**

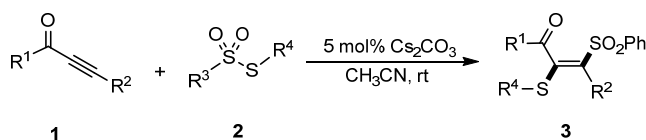

To an oven-dried 10 mL Schlenk tube equipped with a stir bar was added ynone **1** (0.6 mmol), thiosulfonate **2** (0.4 mmol), anhydrous Cs<sub>2</sub>CO<sub>3</sub> (5 mol%) and 4.0 mL of CH<sub>3</sub>CN. Then the reaction mixture was reacted at room temperature until thiosulfonate was consumed completely which was monitored by TLC. The solvent was evaporated, then the crude product was purified by column chromatography on silica gel (200~300 mesh) using ethyl acetate in petroleum ether (v/v = 20:1) as the eluent to afford the corresponding product **3** in moderate to excellent yields.

## 3. Single-crystal X-ray structure analysis **3aj**

**Figure S1.** Crystal structure of **3aj**

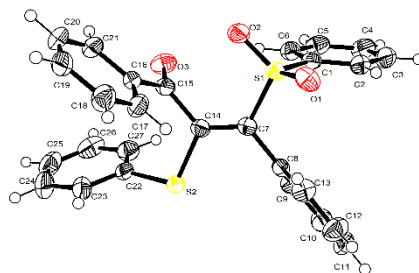

**Table S1.** Crystal data and structure refinement for **3aj**

|                                 |                                                               |          |
|---------------------------------|---------------------------------------------------------------|----------|
| Identification code             | <b>3aj</b>                                                    |          |
| Empirical formula               | C <sub>27</sub> H <sub>20</sub> O <sub>3</sub> S <sub>2</sub> |          |
| Formula weight                  | 456.55                                                        |          |
| Temperature                     | 173.0 K                                                       |          |
| Wavelength                      | 1.54178 Å                                                     |          |
| Crystal system                  | Orthorhombic                                                  |          |
| Space group                     | P2 <sub>1</sub> 2 <sub>1</sub> 2 <sub>1</sub>                 |          |
| Unit cell dimensions            | a = 8.5368(2) Å                                               | α = 90°. |
|                                 | b = 11.7485(3) Å                                              | β = 90°. |
|                                 | c = 22.2440(4) Å                                              | γ = 90°. |
| Volume                          | 2230.95(9) Å <sup>3</sup>                                     |          |
| Z                               | 4                                                             |          |
| Density (calculated)            | 1.359 Mg/m <sup>3</sup>                                       |          |
| Absorption coefficient          | 2.383 mm <sup>-1</sup>                                        |          |
| F (000)                         | 952                                                           |          |
| Crystal size                    | 0.14 x 0.12 x 0.09 mm <sup>3</sup>                            |          |
| Theta range for data collection | 4.256 to 72.127°.                                             |          |
| Index ranges                    | -10 ≤ h ≤ 10, -13 ≤ k ≤ 14, -27 ≤ l ≤ 27                      |          |
| Reflections collected           | 49617                                                         |          |
| Independent reflections         | 4400 [R(int) = 0.0638]                                        |          |
| Completeness to theta = 67.679° | 99.9 %                                                        |          |
| Absorption correction           | Semi-empirical from equivalents                               |          |
| Max. and min. transmission      | 0.7536 and 0.6584                                             |          |
| Refinement method               | Full-matrix least-squares on F <sup>2</sup>                   |          |

|                                      |                                       |
|--------------------------------------|---------------------------------------|
| Data / restraints / parameters       | 4400 / 0 / 289                        |
| Goodness-of-fit on $F^2$             | 1.049                                 |
| Final R indices [ $I > 2\sigma(I)$ ] | R1 = 0.0286, wR2 = 0.0695             |
| R indices (all data)                 | R1 = 0.0308, wR2 = 0.0711             |
| Absolute structure parameter         | 0.041(7)                              |
| Extinction coefficient               | n/a                                   |
| Largest diff. peak and hole          | 0.167 and -0.260 e. $\text{\AA}^{-3}$ |

The CCDC number of product **3aj** is 2153291.

#### 4. Gram-scale preparation of **3a**

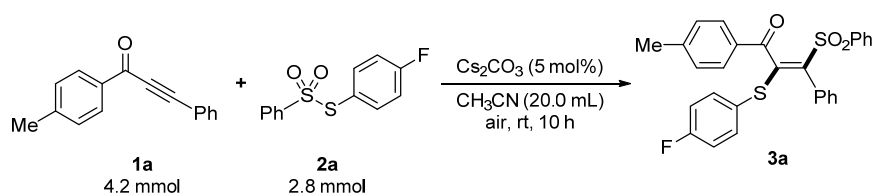

To an oven-dried 100 mL Schlenk tube equipped with a stir bar was added ynone **1a** (1.5 equiv, 4.2 mmol, 0.9244 g), thiosulfonate **2a** (1.0 equiv, 2.8 mmol, 0.7504 g), anhydrous  $\text{Cs}_2\text{CO}_3$  (5 mol%, 45 mg) and 20.0 mL of  $\text{CH}_3\text{CN}$ . Then the reaction mixture was stirred at room temperature for 10 h. The solvent was evaporated, and the crude product was purified by column chromatography on silica gel (200~300 mesh) using ethyl acetate in petroleum ether (v/v = 20:1) as the eluent to afford the corresponding product **3a** (95% yield, 1.31 g).

#### 5. Characterization of products **3**

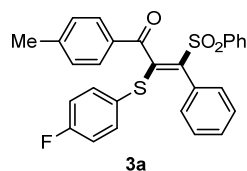

**(E)-2-((4-fluorophenyl)thio)-3-phenyl-3-(phenylsulfonyl)-1-(p-tolyl)prop-2-en-1-one (3a)**: white solid, 191.3 mg, 98% yield; m.p. 118.7-119.5 °C; IR ( $\text{cm}^{-1}$ ): 3062, 2924, 2855, 2359, 2341, 1897, 1673, 1605, 1582, 1489, 1446, 1408, 1320, 1235, 1177, 1150, 1086, 1065, 1015, 943, 838, 806, 736, 697;  $^1\text{H NMR}$  (400 MHz, Chloroform-*d*)  $\delta$  7.73

– 7.64 (m, 2H), 7.64 – 7.52 (m, 3H), 7.45 – 7.36 (m, 5H), 7.26 – 7.16 (m, 4H), 7.11 – 7.05 (m, 2H), 6.76 – 6.68 (m, 2H), 2.41 (s, 3H);  $^{13}\text{C}$  NMR (100 MHz, Chloroform-*d*)  $\delta$  189.6, 163.8 (d,  $J = 250.5$  Hz), 152.5, 144.8, 139.3 (d,  $J = 8.9$  Hz), 139.0, 134.2, 133.5, 133.4, 131.3, 131.1, 129.8, 129.4, 129.3, 128.9, 128.9, 121.9 (d,  $J = 3.3$  Hz), 115.9 (d,  $J = 22.0$  Hz), 22.0;  $^{19}\text{F}$  NMR (376 MHz, Chloroform-*d*)  $\delta$  -109.6; HRMS (ESI)  $m/z$  calcd for  $\text{C}_{28}\text{H}_{21}\text{FO}_3\text{S}_2\text{Na}^+$   $[\text{M}+\text{Na}]^+$  511.0808, found 511.0813.

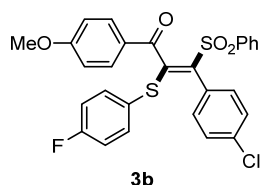

**(*E*)-3-(4-chlorophenyl)-2-((4-fluorophenyl)thio)-1-(4-methoxyphenyl)-3-(phenylsulfonyl)prop-2-en-1-one (3b):** yellow solid, 210.9 mg, 98% yield; m.p. 125.1-125.9 °C; IR ( $\text{cm}^{-1}$ ): 3064, 2935, 2845, 1901, 1665, 1598, 1510, 1488, 1446, 1422, 1397, 1319, 1257, 1151, 1086, 1065, 1025, 937, 909, 833, 738, 706, 688;  $^1\text{H}$  NMR (400 MHz, Chloroform-*d*)  $\delta$  7.76 – 7.69 (m, 2H), 7.65 – 7.60 (m, 2H), 7.60 – 7.55 (m, 1H), 7.47 – 7.41 (m, 2H), 7.37 (d,  $J = 8.4$  Hz, 2H), 7.23 – 7.13 (m, 2H), 7.12 – 7.05 (m, 2H), 6.88 (d,  $J = 9.2$  Hz, 2H), 6.77 – 6.71 (m, 2H), 3.87 (s, 3H);  $^{13}\text{C}$  NMR (100 MHz, Chloroform-*d*)  $\delta$  188.2, 164.1, 163.9 (d,  $J = 250.8$  Hz), 153.3, 139.2 (d,  $J = 8.8$  Hz), 138.9, 136.1, 133.7, 132.5, 131.9, 131.5, 129.7, 129.3, 129.0, 128.8, 121.7 (d,  $J = 3.4$  Hz), 116.0 (d,  $J = 22.0$  Hz), 114.0, 55.7;  $^{19}\text{F}$  NMR (376 MHz, Chloroform-*d*)  $\delta$  -109.3; HRMS (ESI)  $m/z$  calcd for  $\text{C}_{28}\text{H}_{20}\text{ClFO}_4\text{S}_2\text{Na}^+$   $[\text{M}+\text{Na}]^+$  561.0367; found 561.0368.

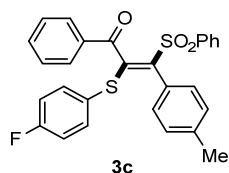

**(*E*)-2-((4-fluorophenyl)thio)-1-phenyl-3-(phenylsulfonyl)-3-(p-tolyl)prop-2-en-1-one (3c):** yellow solid, 191.3 mg, 98% yield; m.p. 145.0-145.8 °C; IR ( $\text{cm}^{-1}$ ): 3063, 2923, 2863, 2360, 1901, 1680, 1590, 1489, 1448, 1399, 1320, 1236, 1151, 1085, 1063, 1022, 940, 838, 783, 752, 720, 688;  $^1\text{H}$  NMR (400 MHz, Chloroform-*d*)  $\delta$  7.81 – 7.73 (m, 2H), 7.65 – 7.59 (m, 2H), 7.59 – 7.50 (m, 2H), 7.46 – 7.37 (m, 4H), 7.21 (d,  $J = 8.0$  Hz, 2H), 7.17 – 7.02 (m, 4H), 6.74 – 6.67 (m, 2H), 2.39 (s, 3H);  $^{13}\text{C}$  NMR (100 MHz, Chloroform-*d*)  $\delta$  190.1, 163.8 (d,  $J = 250.6$  Hz), 152.2, 140.0, 139.3 (d,  $J = 8.8$  Hz), 139.0, 136.5, 133.7, 133.7, 133.5, 130.9, 129.7, 129.2, 128.9, 128.6, 128.2, 121.9 (d,  $J$

= 3.4 Hz), 115.9 (d,  $J = 22.0$  Hz), 21.6;  $^{19}\text{F}$  NMR (376 MHz, Chloroform-*d*)  $\delta$  -109.5; HRMS (ESI)  $m/z$  calcd for  $\text{C}_{28}\text{H}_{21}\text{FO}_3\text{S}_2\text{Na}^+ [\text{M}+\text{Na}]^+$  511.0808, found 511.0811.

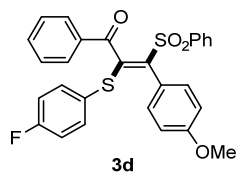

**(E)-2-((4-fluorophenyl)thio)-3-(4-methoxyphenyl)-1-phenyl-3-**

**(phenylsulfonyl)prop-2-en-1-one (3d):** yellow solid, 187.5 mg, 93% yield; m.p. 161.0-161.7 °C; IR ( $\text{cm}^{-1}$ ): 3065, 2964, 2839, 1899, 1677, 1590, 1506, 1491, 1448, 1399, 1319, 1252, 1174, 1150, 1085, 1063, 1025, 947, 840, 816, 782, 755, 724, 688;  $^1\text{H}$  NMR (400 MHz, Chloroform-*d*)  $\delta$  7.79 – 7.73 (m, 2H), 7.62 – 7.58 (m, 2H), 7.58 – 7.49 (m, 2H), 7.46 – 7.37 (m, 4H), 7.17 (d,  $J = 8.0$  Hz, 2H), 7.10 – 7.03 (m, 2H), 6.95 – 6.89 (m, 2H), 6.75 – 6.66 (m, 2H), 3.84 (s, 3H);  $^{13}\text{C}$  NMR (100 MHz, Chloroform-*d*)  $\delta$  190.1, 163.8 (d,  $J = 250.6$  Hz), 160.7, 152.5, 139.3 (d,  $J = 8.9$  Hz), 139.0, 136.5, 133.7, 133.6, 133.3, 132.5, 129.2, 128.9, 128.8, 128.6, 123.1, 121.9 (d,  $J = 3.4$  Hz), 116.0 (d,  $J = 22.0$  Hz), 114.4, 55.4;  $^{19}\text{F}$  NMR (376 MHz, Chloroform-*d*)  $\delta$  -109.5; HRMS (ESI)  $m/z$  calcd for  $\text{C}_{28}\text{H}_{21}\text{FO}_4\text{S}_2\text{Na}^+ [\text{M}+\text{Na}]^+$  527.0757, found 527.0759.

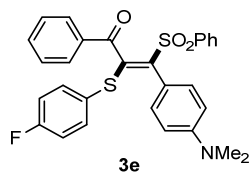

**(E)-3-(4-(dimethylamino)phenyl)-2-((4-fluorophenyl)thio)-1-phenyl-3-**

**(phenylsulfonyl)prop-2-en-1-one (3e):** yellow solid, 186.2 mg, 90% yield; m.p. 93.2-94.1 °C; IR ( $\text{cm}^{-1}$ ): 3064, 2923, 2810, 1898, 1673, 1607, 1518, 1489, 1447, 1361, 1308, 1228, 1190, 1149, 1084, 1062, 1024, 950, 836, 753, 723, 688;  $^1\text{H}$  NMR (400 MHz, Chloroform-*d*)  $\delta$  7.77 (d,  $J = 7.6$  Hz, 2H), 7.63 – 7.58 (m, 2H), 7.54 – 7.46 (m, 2H), 7.42 – 7.34 (m, 4H), 7.14 – 7.02 (m, 4H), 6.72 – 6.63 (m, 4H), 2.96 (s, 6H);  $^{13}\text{C}$  NMR (100 MHz, Chloroform-*d*)  $\delta$  190.1, 163.6 (d,  $J = 250.3$  Hz), 151.6, 150.9, 139.2, 139.2 (d,  $J = 8.7$  Hz), 136.5, 133.9, 133.5, 133.2, 131.8, 129.0, 128.7, 128.7, 128.4, 122.2 (d,  $J = 3.4$  Hz), 117.5, 115.7 (d,  $J = 22.0$  Hz), 111.7, 40.1;  $^{19}\text{F}$  NMR (376 MHz, Chloroform-*d*)  $\delta$  -109.9; HRMS (ESI)  $m/z$  calcd for  $\text{C}_{29}\text{H}_{24}\text{FNO}_3\text{S}_2\text{Na}^+ [\text{M}+\text{Na}]^+$  540.1073, found 540.1077.

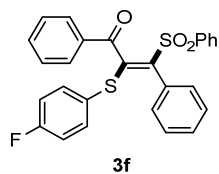

**(E)-2-((4-fluorophenyl)thio)-1,3-diphenyl-3-(phenylsulfonyl)prop-2-en-1-one (3f):** yellow solid, 183.9 mg, 97% yield; m.p. 110.6-111.5 °C; IR (cm<sup>-1</sup>): 3065, 2926, 1904, 1809, 1678, 1589, 1489, 1447, 1399, 1318, 1236, 1149, 1085, 1063, 1023, 944, 836, 769, 698; <sup>1</sup>H NMR (400 MHz, Chloroform-*d*) δ 7.81 – 7.75 (m, 2H), 7.62 – 7.58 (m, 2H), 7.58 – 7.50 (m, 2H), 7.46 – 7.38 (m, 7H), 7.24 (d, *J* = 6.0 Hz, 2H), 7.10 – 7.03 (m, 2H), 6.74 – 6.67 (m, 2H); <sup>13</sup>C NMR (100 MHz, Chloroform-*d*) δ 190.0, 163.8 (d, *J* = 250.7 Hz), 152.3, 139.3 (d, *J* = 8.9 Hz), 138.9, 136.5, 133.8, 133.7, 133.6, 131.2, 131.1, 129.8, 129.2, 129.0, 128.9, 128.9, 128.7, 121.8 (d, *J* = 3.4 Hz), 116.0 (d, *J* = 22.0 Hz); <sup>19</sup>F NMR (376 MHz, Chloroform-*d*) δ -109.4; HRMS (ESI) *m/z* calcd for C<sub>27</sub>H<sub>19</sub>FO<sub>3</sub>S<sub>2</sub>Na<sup>+</sup> [M+Na]<sup>+</sup> 497.0651, found 497.0652.

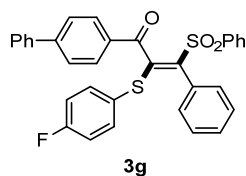

**(E)-1-([1,1'-biphenyl]-4-yl)-2-((4-fluorophenyl)thio)-3-phenyl-3-(phenylsulfonyl)prop-2-en-1-one (3g):** yellow solid, 206.8 mg, 94% yield; m.p. 150.7-151.5 °C; IR (cm<sup>-1</sup>): 3329, 3062, 2926, 2855, 1898, 1809, 1672, 1603, 1489, 1447, 1405, 1320, 1235, 1178, 1085, 1067, 1007, 944, 831, 768, 741, 697; <sup>1</sup>H NMR (400 MHz, Chloroform-*d*) δ 7.85 (d, *J* = 8.4 Hz, 2H), 7.68 – 7.60 (m, 6H), 7.59 – 7.54 (m, 1H), 7.51 – 7.46 (m, 2H), 7.46 – 7.37 (m, 6H), 7.30 – 7.21 (m, 2H), 7.15 – 7.07 (m, 2H), 6.76 – 6.67 (m, 2H); <sup>13</sup>C NMR (100 MHz, Chloroform-*d*) δ 189.6, 163.9 (d, *J* = 250.7 Hz), 152.3, 146.4, 139.9, 139.3 (d, *J* = 8.9 Hz), 138.9, 135.3, 133.7, 133.6, 131.2, 131.1, 129.8, 129.7, 129.1, 129.0, 128.9, 128.9, 128.5, 127.4, 127.3, 121.8 (d, *J* = 3.4 Hz), 116.0 (d, *J* = 22.0 Hz); <sup>19</sup>F NMR (376 MHz, Chloroform-*d*) δ -109.3; HRMS (ESI) *m/z* calcd for C<sub>33</sub>H<sub>23</sub>FO<sub>3</sub>S<sub>2</sub>Na<sup>+</sup> [M+Na]<sup>+</sup> 573.0964, found 573.0967.

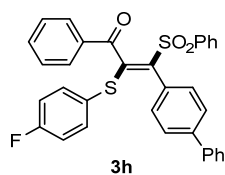

**(E)-3-([1,1'-biphenyl]-4-yl)-2-((4-fluorophenyl)thio)-1-phenyl-3-**

**(phenylsulfonyl)prop-2-en-1-one (3h):** white solid, 211.2 mg, 96% yield; m.p. 187.2-188.2 °C; IR (cm<sup>-1</sup>): 3063, 1899, 1675, 1589, 1488, 1448, 1399, 1319, 1235, 1150, 1085, 1062, 1013, 942, 838, 771, 727, 688, 661; <sup>1</sup>H NMR (400 MHz, Chloroform-*d*) δ 7.84 – 7.76 (m, 2H), 7.69 – 7.61 (m, 6H), 7.61 – 7.52 (m, 2H), 7.49 – 7.36 (m, 7H), 7.31 (d, *J* = 7.6 Hz, 2H), 7.13 – 7.03 (m, 2H), 6.77 – 6.67 (m, 2H); <sup>13</sup>C NMR (100 MHz, Chloroform-*d*) δ 190.1, 163.8 (d, *J* = 250.9 Hz), 152.5, 142.5, 140.2, 139.3 (d, *J* = 8.9 Hz), 139.0, 136.5, 133.8, 133.6, 133.4, 131.5, 130.0, 129.2, 129.0, 129.0, 128.9, 128.7, 128.0, 127.6, 127.3, 121.8 (d, *J* = 3.3 Hz), 116.0 (d, *J* = 22.0 Hz); <sup>19</sup>F NMR (376 MHz, Chloroform-*d*) δ -109.4; HRMS (ESI) *m/z* calcd for C<sub>33</sub>H<sub>23</sub>FO<sub>3</sub>S<sub>2</sub>Na<sup>+</sup> [M+Na]<sup>+</sup> 573.0964, found 573.0966.

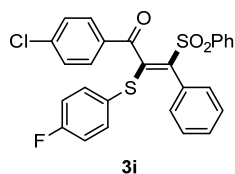

**(E)-1-(4-chlorophenyl)-2-((4-fluorophenyl)thio)-3-phenyl-3-**

**(phenylsulfonyl)prop-2-en-1-one (3i):** white solid, 199.2 mg, 98% yield; m.p. 204.9-205.5 °C; IR (cm<sup>-1</sup>): 3063, 2923, 2887, 1899, 1678, 1588, 1489, 1446, 1400, 1320, 1235, 1150, 1091, 1023, 943, 830, 805, 730, 697; <sup>1</sup>H NMR (400 MHz, Chloroform-*d*) δ 7.76 – 7.69 (m, 2H), 7.62 – 7.55 (m, 3H), 7.47 – 7.37 (m, 7H), 7.26 – 7.17 (m, 2H), 7.12 – 7.05 (m, 2H), 6.80 – 6.72 (m, 2H); <sup>13</sup>C NMR (100 MHz, Chloroform-*d*) δ 188.9, 163.9 (d, *J* = 251.1 Hz), 151.6, 139.3 (d, *J* = 8.9 Hz), 138.7, 134.9, 134.1, 133.7, 131.0, 131.0, 130.4, 129.9, 129.1, 129.0, 128.9, 121.6 (d, *J* = 3.4 Hz), 116.2 (d, *J* = 22.0 Hz); <sup>19</sup>F NMR (376 MHz, Chloroform-*d*) δ -109.0; HRMS (ESI) *m/z* calcd for C<sub>27</sub>H<sub>18</sub>ClFO<sub>3</sub>S<sub>2</sub>Na<sup>+</sup> [M+Na]<sup>+</sup> 531.0262, found 531.0266.

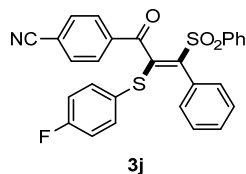

**(E)-4-(2-((4-fluorophenyl)thio)-3-phenyl-3-(phenylsulfonyl)acryloyl)benzonitrile**

**(3j):** white solid, 195.6 mg, 98% yield; m.p. 102.5-103.1 °C; IR (cm<sup>-1</sup>): 3052, 2358, 1681, 1587, 1487, 1404, 1315, 1266, 1233, 1151, 1084, 1061, 1027, 952, 863, 750, 695; <sup>1</sup>H NMR (400 MHz, Chloroform-*d*) δ 7.92 – 7.84 (m, 2H), 7.76 – 7.69 (m, 2H), 7.63 – 7.54 (m, 3H), 7.49 – 7.37 (m, 5H), 7.26 – 7.16 (m, 2H), 7.11 – 7.03 (m, 2H), 6.81 –



6.72 (m, 2H);  $^{13}\text{C}$  NMR (100 MHz, Chloroform-*d*)  $\delta$  188.9, 164.0 (d,  $J = 251.8$  Hz), 150.7, 139.3 (d,  $J = 9.1$  Hz), 138.4, 135.0, 133.9, 132.5, 130.9, 130.6, 130.1, 129.3, 129.1, 129.1, 128.8, 121.3 (d,  $J = 3.5$  Hz), 118.0, 116.8, 116.3 (d,  $J = 22.0$  Hz);  $^{19}\text{F}$  NMR (376 MHz, Chloroform-*d*)  $\delta$  -108.4; HRMS (ESI)  $m/z$  calcd for  $\text{C}_{28}\text{H}_{18}\text{FNO}_3\text{S}_2\text{Na}^+$   $[\text{M}+\text{Na}]^+$  522.0604, found 522.0607.

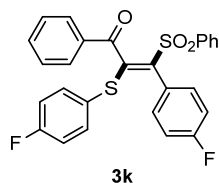

**(*E*)-3-(4-fluorophenyl)-2-((4-fluorophenyl)thio)-1-phenyl-3-(phenylsulfonyl)prop-2-en-1-one (3k):** white solid, 181.1 mg, 92% yield; m.p. 146.6-147.5 °C; IR ( $\text{cm}^{-1}$ ): 3066, 1899, 1676, 1589, 1503, 1488, 1448, 1399, 1320, 1226, 1151, 1085, 1063, 1024, 948, 863, 790, 756, 723, 688;  $^1\text{H}$  NMR (400 MHz, Chloroform-*d*)  $\delta$  7.80 – 7.73 (m, 2H), 7.62 – 7.51 (m, 4H), 7.47 – 7.38 (m, 4H), 7.26 – 7.17 (m, 2H), 7.14 – 7.03 (m, 4H), 6.75 – 6.68 (m, 2H);  $^{13}\text{C}$  NMR (100 MHz, Chloroform-*d*)  $\delta$  189.9, 163.9 (d,  $J = 251.0$  Hz), 163.5 (d,  $J = 249.0$  Hz), 153.0, 139.3 (d,  $J = 8.9$  Hz), 138.8, 136.4, 133.9, 133.7, 133.2 (d,  $J = 8.4$  Hz), 132.6, 129.1, 129.0, 128.8, 128.7, 127.0 (d,  $J = 3.2$  Hz), 121.5 (d,  $J = 3.4$  Hz), 116.2 (d,  $J = 21.6$  Hz), 116.0 (d,  $J = 22.0$  Hz);  $^{19}\text{F}$  NMR (376 MHz, Chloroform-*d*)  $\delta$  -109.2, -110.3; HRMS (ESI)  $m/z$  calcd for  $\text{C}_{27}\text{H}_{18}\text{F}_2\text{O}_3\text{S}_2\text{Na}^+$   $[\text{M}+\text{Na}]^+$  515.0557, found 515.0558.

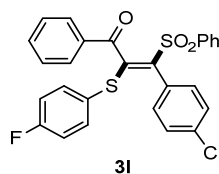

**(*E*)-3-(4-chlorophenyl)-2-((4-fluorophenyl)thio)-1-phenyl-3-(phenylsulfonyl)prop-2-en-1-one (3l):** yellow solid, 199.2 mg, 98% yield; m.p. 149.6-150.3 °C; IR ( $\text{cm}^{-1}$ ): 3067, 2925, 1904, 1676, 1589, 1488, 1448, 1396, 1320, 1236, 1150, 1086, 1015, 940, 837, 799, 755, 722, 688;  $^1\text{H}$  NMR (400 MHz, Chloroform-*d*)  $\delta$  7.75 (d,  $J = 8.0$  Hz, 2H), 7.62 – 7.50 (m, 4H), 7.47 – 7.36 (m, 6H), 7.19 (d,  $J = 7.2$  Hz, 2H), 7.10 – 7.02 (m, 2H), 6.76 – 6.67 (m, 2H);  $^{13}\text{C}$  NMR (100 MHz, Chloroform-*d*)  $\delta$  189.8, 163.9 (d,  $J = 251.0$  Hz), 153.0, 139.3 (d,  $J = 8.9$  Hz), 138.7, 136.3, 136.2, 133.9, 133.8, 132.5, 132.5, 129.6, 129.4, 129.1, 129.1, 128.8, 128.7, 121.4 (d,  $J = 3.5$  Hz), 116.0 (d,  $J = 22.0$  Hz);  $^{19}\text{F}$  NMR (376 MHz, Chloroform-*d*)  $\delta$  -109.1; HRMS (ESI)  $m/z$  calcd for  $\text{C}_{27}\text{H}_{18}\text{ClFO}_3\text{S}_2\text{Na}^+$   $[\text{M}+\text{Na}]^+$  531.0262, found 531.0265.

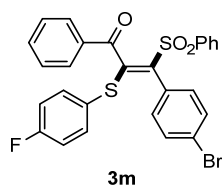

**(E)-3-(4-bromophenyl)-2-((4-fluorophenyl)thio)-1-phenyl-3-**

**(phenylsulfonyl)prop-2-en-1-one (3m):** yellow solid, 216.4 mg 98% yield; m.p. 102.4-103.2 °C; IR (cm<sup>-1</sup>): 3064, 2923, 2851, 1900, 1676, 1589, 1489, 1448, 1391, 1320, 1257, 1236, 1151, 1085, 1064, 1017, 939, 837, 797, 754, 737, 688; <sup>1</sup>H NMR (400 MHz, Chloroform-*d*) δ 7.80 – 7.71 (m, 2H), 7.63 – 7.49 (m, 6H), 7.47 – 7.36 (m, 4H), 7.20 – 7.09 (m, 2H), 7.08 – 7.01 (m, 2H), 6.75 – 6.67 (m, 2H); <sup>13</sup>C NMR (100 MHz, Chloroform-*d*) δ 189.9, 163.8 (d, *J* = 251.0 Hz), 153.0, 139.3 (d, *J* = 8.9 Hz), 138.7, 136.3, 133.9, 133.8, 132.7, 132.4, 132.3, 130.0, 129.1, 129.0, 128.8, 128.6, 124.5, 121.3 (d, *J* = 3.4 Hz), 116.0 (d, *J* = 22.0 Hz); <sup>19</sup>F NMR (376 MHz, Chloroform-*d*) δ -109.1; HRMS (ESI) *m/z* calcd for C<sub>27</sub>H<sub>18</sub>BrFO<sub>3</sub>S<sub>2</sub>Na<sup>+</sup> [M+Na]<sup>+</sup> 574.9757, found 574.9760.

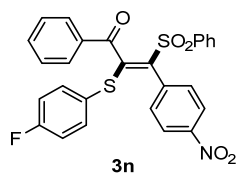

**(E)-2-((4-fluorophenyl)thio)-3-(4-nitrophenyl)-1-phenyl-3-(phenylsulfonyl)prop-2-en-1-one (3n):** yellow solid, 203.5 mg, 98% yield; m.p. 243.5-244.2 °C; IR (cm<sup>-1</sup>): 3079, 1663, 1569, 1518, 1488, 1445, 1347, 1322, 1220, 1147, 1083, 942, 831, 759, 686, 580, 567, 448; <sup>1</sup>H NMR (400 MHz, Chloroform-*d*) δ 8.30 – 8.23 (m, 2H), 7.79 – 7.73 (m, 2H), 7.64 – 7.59 (m, 3H), 7.58 – 7.53 (m, 1H), 7.50 – 7.40 (m, 6H), 7.10 – 7.02 (m, 2H), 6.76 – 6.70 (m, 2H); <sup>13</sup>C NMR (100 MHz, Chloroform-*d*) δ 189.5, 164.0 (d, *J* = 251.6 Hz), 153.8, 148.6, 139.3 (d, *J* = 8.9 Hz), 138.5, 137.9, 136.2, 134.1, 132.5, 131.7, 129.3, 129.1, 128.8, 128.8, 124.2, 123.0, 120.8 (d, *J* = 3.2 Hz), 116.2 (d, *J* = 22.1 Hz); <sup>19</sup>F NMR (376 MHz, Chloroform-*d*) δ -108.6; HRMS (ESI) *m/z* calcd for C<sub>27</sub>H<sub>18</sub>FNO<sub>5</sub>S<sub>2</sub>Na<sup>+</sup> [M+Na]<sup>+</sup> 542.0502, found 542.0504.

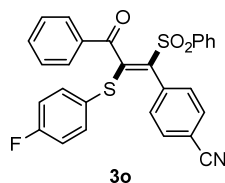

**(E)-4-(2-((4-fluorophenyl)thio)-3-oxo-3-phenyl-1-(phenylsulfonyl)prop-1-en-1-yl)benzotrile (3o):** white solid, 183.7 mg, 92% yield; m.p. 176.1-177.0 °C; IR (cm<sup>-1</sup>)

<sup>1</sup>): 3064, 2923, 2230, 1903, 1676, 1589, 1490, 1448, 1400, 1322, 1236, 1151, 1084, 1063, 1021, 943, 840, 726, 688; <sup>1</sup>H NMR (400 MHz, Chloroform-*d*) δ 7.78 – 7.72 (m, 2H), 7.70 (m, *J* = 8.8 Hz, 2H), 7.64 – 7.57 (m, 3H), 7.57 – 7.52 (m, 1H), 7.50 – 7.34 (m, 6H), 7.10 – 7.01 (m, 2H), 6.77 – 6.69 (m, 2H); <sup>13</sup>C NMR (100 MHz, Chloroform-*d*) δ 189.5, 164.0 (d, *J* = 251.4 Hz), 153.6, 139.3 (d, *J* = 9.0 Hz), 138.5, 136.2, 136.0, 134.1, 134.0, 132.7, 132.1, 132.0, 129.2, 129.1, 128.8, 120.9 (d, *J* = 3.5 Hz), 118.3, 116.2 (d, *J* = 22.1 Hz), 113.6; <sup>19</sup>F NMR (376 MHz, Chloroform-*d*) δ -108.7; HRMS (ESI) *m/z* calcd for C<sub>28</sub>H<sub>18</sub>FNO<sub>3</sub>S<sub>2</sub>Na<sup>+</sup> [M+Na]<sup>+</sup> 522.0604, found 522.0607.

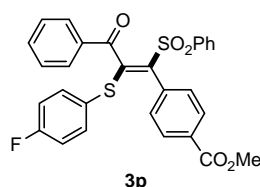

**methyl (*E*)-4-(2-((4-fluorophenyl)thio)-3-oxo-3-phenyl-1-(phenylsulfonyl)prop-1-en-1-yl)benzoate (**3p**):** white solid, 206.4 mg, 97% yield; m.p. 118.3-118.9 °C; IR (cm<sup>-1</sup>): 3065, 2953, 2831, 1904, 1724, 1676, 1589, 1490, 1448, 1401, 1321, 1277, 1237, 1151, 1111, 1085, 1062, 1020, 944, 868, 835, 772, 736, 701, 682; <sup>1</sup>H NMR (400 MHz, Chloroform-*d*) δ 8.07 (d, *J* = 8.4 Hz, 2H), 7.82 – 7.74 (m, 2H), 7.62 – 7.57 (m, 2H), 7.57 – 7.48 (m, 2H), 7.46 – 7.29 (m, 6H), 7.10 – 7.01 (m, 2H), 6.75 – 6.66 (m, 2H), 3.91 (d, *J* = 1.6 Hz, 3H); <sup>13</sup>C NMR (100 MHz, Chloroform-*d*) δ 189.7, 166.5, 163.8 (d, *J* = 251.0 Hz), 152.8, 139.3 (d, *J* = 8.9 Hz), 138.6, 136.3, 135.8, 133.9, 133.8, 132.8, 131.3, 131.2, 130.1, 129.1, 129.0, 128.8, 128.7, 121.3 (d, *J* = 3.4 Hz), 116.0 (d, *J* = 22.1 Hz), 52.4; <sup>19</sup>F NMR (376 MHz, Chloroform-*d*) δ -109.1; HRMS (ESI) *m/z* calcd for C<sub>29</sub>H<sub>21</sub>FO<sub>5</sub>S<sub>2</sub>Na<sup>+</sup> [M+Na]<sup>+</sup> 555.0706, found 555.0707.

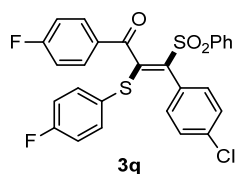

**(*E*)-3-(4-chlorophenyl)-1-(4-fluorophenyl)-2-((4-fluorophenyl)thio)-3-(phenylsulfonyl)prop-2-en-1-one (**3q**):** yellow solid, 204.1 mg, 97% yield; m.p. 141.4-142.1 °C; IR (cm<sup>-1</sup>): 3068, 1678, 1598, 1488, 1444, 1413, 1320, 1241, 1152, 1086, 1015, 936, 834, 720, 689, 631, 583, 521, 450; <sup>1</sup>H NMR (400 MHz, Chloroform-*d*) δ 7.82 – 7.74 (m, 2H), 7.64 – 7.56 (m, 3H), 7.49 – 7.42 (m, 2H), 7.38 (d, *J* = 8.7 Hz, 2H), 7.24 – 7.12 (m, 2H), 7.12 – 7.04 (m, 4H), 6.90 – 6.72 (m, 2H); <sup>13</sup>C NMR (100 MHz, Chloroform-*d*) δ 188.3, 166.0 (d, *J* = 255.0 Hz), 163.9 (d, *J* = 251.3 Hz), 152.6, 139.3

(d,  $J = 8.9$  Hz), 138.6, 136.2, 133.8, 133.0, 132.9, 132.7, 132.5, 131.7 (d,  $J = 9.6$  Hz), 129.4, 129.1, 128.8, 128.2 (d,  $J = 2.0$  Hz), 121.3 (d,  $J = 3.5$  Hz), 116.1 (d,  $J = 22.3$  Hz), 115.9 (d,  $J = 22.5$  Hz);  $^{19}\text{F}$  NMR (376 MHz, Chloroform-*d*)  $\delta$  -103.2, -108.8; HRMS (ESI)  $m/z$  calcd for  $\text{C}_{27}\text{H}_{17}\text{ClF}_2\text{O}_3\text{S}_2\text{Na}^+$   $[\text{M}+\text{Na}]^+$  549.0167, found 549.0169.

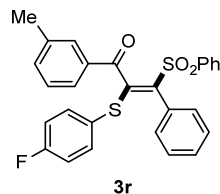

**(*E*)-2-((4-fluorophenyl)thio)-3-phenyl-3-(phenylsulfonyl)-1-(*m*-tolyl)prop-2-en-1-one (3r):** white solid, 183.5 mg, 94% yield; m.p. 110.5-111.1 °C; IR ( $\text{cm}^{-1}$ ): 3063, 2924, 2860, 1899, 1673, 1587, 1488, 1446, 1399, 1319, 1264, 1233, 1149, 1085, 1030, 1000, 958, 878, 835, 786, 723, 699;  $^1\text{H}$  NMR (400 MHz, Chloroform-*d*)  $\delta$  7.63 (d,  $J = 7.2$  Hz, 1H), 7.61 – 7.53 (m, 3H), 7.51 (s, 1H), 7.46 – 7.37 (m, 5H), 7.35 – 7.28 (m, 2H), 7.27 – 7.19 (m, 2H), 7.10 – 7.03 (m, 2H), 6.75 – 6.68 (m, 2H), 2.36 (s, 3H);  $^{13}\text{C}$  NMR (100 MHz, Chloroform-*d*)  $\delta$  190.1, 163.8 (d,  $J = 250.6$  Hz), 152.5, 139.3 (d,  $J = 8.9$  Hz), 138.9, 138.4, 136.5, 134.6, 133.6, 133.5, 131.2, 131.1, 129.8, 129.1, 128.9, 128.9, 128.5, 126.8, 121.8 (d,  $J = 3.4$  Hz), 115.9 (d,  $J = 22.0$  Hz), 21.4;  $^{19}\text{F}$  NMR (376 MHz, Chloroform-*d*)  $\delta$  -109.6; HRMS (ESI)  $m/z$  calcd for  $\text{C}_{28}\text{H}_{21}\text{FO}_3\text{S}_2\text{Na}^+$   $[\text{M}+\text{Na}]^+$  511.0808, found 511.0811.

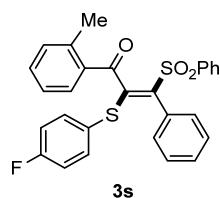

**(*E*)-2-((4-fluorophenyl)thio)-3-phenyl-3-(phenylsulfonyl)-1-(*o*-tolyl)prop-2-en-1-one (3s):** yellow solid, 191.3 mg, 98% yield; m.p. 164.3-165.1 °C; IR ( $\text{cm}^{-1}$ ): 3063, 2971, 2929, 1674, 1590, 1448, 1402, 1318, 1235, 1151, 1084, 1050, 1030, 942, 837, 766, 736, 711, 691, 636, 578, 519, 485;  $^1\text{H}$  NMR (400 MHz, Chloroform-*d*)  $\delta$  8.03 (d,  $J = 7.2$  Hz, 1H), 7.63 – 7.58 (m, 2H), 7.58 – 7.53 (m, 1H), 7.44 – 7.32 (m, 7H), 7.25 – 7.18 (m, 2H), 7.10 (d,  $J = 7.2$  Hz, 1H), 7.08 – 7.02 (m, 2H), 6.76 – 6.70 (m, 2H), 2.23 (s, 3H);  $^{13}\text{C}$  NMR (100 MHz, Chloroform-*d*)  $\delta$  190.8, 163.8 (d,  $J = 250.7$  Hz), 153.3, 141.2, 139.2 (d,  $J = 8.8$  Hz), 139.0, 134.3, 133.5, 133.4, 133.0, 132.8, 132.2, 131.3, 131.1, 129.7, 128.9, 128.9, 125.9, 121.9 (d,  $J = 3.4$  Hz), 115.9 (d,  $J = 21.9$  Hz), 21.8;  $^{19}\text{F}$  NMR (376 MHz, Chloroform-*d*)  $\delta$  -109.5; HRMS (ESI)  $m/z$  calcd for  $\text{C}_{28}\text{H}_{21}\text{FO}_3\text{S}_2\text{Na}^+$   $[\text{M}+\text{Na}]^+$  511.0808, found 511.0812.

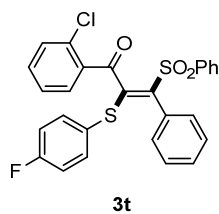

3t

**(E)-1-(2-chlorophenyl)-2-((4-fluorophenyl)thio)-3-phenyl-3-**

**(phenylsulfonyl)prop-2-en-1-one (3t):** yellow solid, 199.2 mg, 98% yield; m.p. 181.1-182.0 °C; IR (cm<sup>-1</sup>): 3067, 2924, 2853, 2359, 2197, 1892, 1683, 1588, 1489, 1446, 1399, 1318, 1269, 1232, 1149, 1085, 1045, 944, 834, 765, 734, 697; <sup>1</sup>H NMR (400 MHz, Chloroform-*d*) δ 7.84 (d, *J* = 8.4 Hz, 1H), 7.71–7.65 (m, 2H), 7.61–7.54 (m, 1H), 7.48–7.33 (m, 7H), 7.33–7.27 (m, 1H), 7.25–7.15 (m, 2H), 7.14–7.07 (m, 2H), 6.79–6.70 (m, 2H); <sup>13</sup>C NMR (100 MHz, Chloroform-*d*) δ 187.8, 163.9 (d, *J* = 250.7 Hz), 152.9, 138.9 (d, *J* = 8.8 Hz), 134.7, 133.9, 133.6, 133.5, 133.4, 133.3, 131.8, 131.2, 130.8, 129.8, 129.0, 128.9, 128.9, 126.8, 121.6 (d, *J* = 3.3 Hz), 116.2 (d, *J* = 22.0 Hz); <sup>19</sup>F NMR (376 MHz, Chloroform-*d*) δ -109.4; HRMS (ESI) *m/z* calcd for C<sub>27</sub>H<sub>18</sub>ClFO<sub>3</sub>S<sub>2</sub>Na<sup>+</sup> [M+Na]<sup>+</sup> 531.0262, found 531.0263.

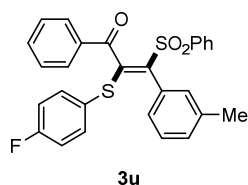

3u

**(E)-2-((4-fluorophenyl)thio)-1-phenyl-3-(phenylsulfonyl)-3-(m-tolyl)prop-2-en-1-**

**one (3u):** yellow solid, 189.4 mg, 97% yield; m.p. 180.7-181.3 °C; IR (cm<sup>-1</sup>): 3063, 2923, 2855, 1900, 1676, 1589, 1489, 1448, 1399, 1319, 1263, 1234, 1149, 1085, 1063, 1024, 1014, 966, 870, 838, 782, 736, 702, 688; <sup>1</sup>H NMR (400 MHz, Chloroform-*d*) δ 7.78 (d, *J* = 7.6 Hz, 2H), 7.63–7.49 (m, 4H), 7.46–7.36 (m, 4H), 7.29–7.21 (m, 2H), 7.13–7.02 (m, 3H), 6.96 (s, 1H), 6.75–6.64 (m, 2H), 2.35 (s, 3H); <sup>13</sup>C NMR (100 MHz, Chloroform-*d*) δ 190.1, 163.8 (d, *J* = 250.7 Hz), 152.1, 139.3 (d, *J* = 8.8 Hz), 138.9, 138.7, 136.5, 133.8, 133.7, 133.6, 131.5, 131.0, 130.6, 129.1, 128.9, 128.8, 128.7, 128.6, 128.0, 121.8 (d, *J* = 3.5 Hz), 115.9 (d, *J* = 22.0 Hz), 21.5; <sup>19</sup>F NMR (376 MHz, Chloroform-*d*) δ -109.5; HRMS (ESI) *m/z* calcd for C<sub>28</sub>H<sub>21</sub>FO<sub>3</sub>S<sub>2</sub>Na<sup>+</sup> [M+Na]<sup>+</sup> 511.0808, found 511.0810.

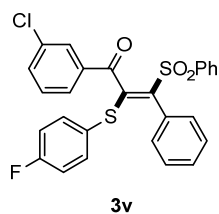

3v

**(E)-1-(3-chlorophenyl)-2-((4-fluorophenyl)thio)-3-phenyl-3-**

**(phenylsulfonyl)prop-2-en-1-one (3v):** yellow solid, 197.1 mg, 97% yield; m.p. 118.3-118.9 °C; IR (cm<sup>-1</sup>): 3066, 2924, 2853, 1899, 1681, 1589, 1490, 1446, 1426, 1321, 1236, 1150, 1085, 1062, 1032, 1014, 998, 957, 836, 790, 736, 699; <sup>1</sup>H NMR (400 MHz, Chloroform-*d*) δ 7.75 – 7.65 (m, 2H), 7.62 – 7.54 (m, 3H), 7.53 – 7.48 (m, 1H), 7.47 – 7.34 (m, 6H), 7.26 – 7.17 (m, 2H), 7.13 – 7.05 (m, 2H), 6.80 – 6.73 (m, 2H); <sup>13</sup>C NMR (100 MHz, Chloroform-*d*) δ 188.9, 164.0 (d, *J* = 251.4 Hz), 151.4, 139.3 (d, *J* = 8.9 Hz), 138.7, 138.0, 135.0, 134.4, 133.8, 133.6, 131.0, 130.9, 130.0, 130.0, 129.0, 128.9, 128.8, 127.4, 121.5 (d, *J* = 3.4 Hz), 116.2 (d, *J* = 22.0 Hz), 100.1; <sup>19</sup>F NMR (376 MHz, Chloroform-*d*) δ -108.9; HRMS (ESI) *m/z* calcd for C<sub>27</sub>H<sub>18</sub>ClFO<sub>3</sub>S<sub>2</sub>Na<sup>+</sup> [M+Na]<sup>+</sup> 531.0262, found 531.0264.

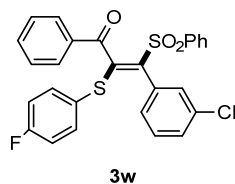

**(E)-3-(3-chlorophenyl)-2-((4-fluorophenyl)thio)-1-phenyl-3-**

**(phenylsulfonyl)prop-2-en-1-one (3w):** yellow solid, 180.9 mg, 89% yield; m.p. 179.6-180.5 °C; IR (cm<sup>-1</sup>): 3066, 1677, 1590, 1490, 1448, 1402, 1319, 1237, 1149, 1083, 1062, 1025, 963, 834, 726, 689, 635, 581, 519, 452; <sup>1</sup>H NMR (400 MHz, Chloroform-*d*) δ 7.68 (d, *J* = 7.2 Hz, 2H), 7.55 – 7.42 (m, 4H), 7.39 – 7.29 (m, 5H), 7.27 – 7.21 (m, 1H), 7.17 (s, 1H), 7.06 – 6.93 (m, 3H), 6.66 – 6.59 (m, 2H); <sup>13</sup>C NMR (100 MHz, Chloroform-*d*) δ 189.7, 163.8 (d, *J* = 251.1 Hz), 153.1, 139.3 (d, *J* = 8.9 Hz), 138.6, 136.2, 134.7, 133.9, 133.8, 132.8, 132.2, 131.0, 130.2, 130.0, 129.3, 129.0, 129.0, 128.8, 128.6, 121.3 (d, *J* = 3.4 Hz), 116.0 (d, *J* = 22.0 Hz); <sup>19</sup>F NMR (376 MHz, Chloroform-*d*) δ -109.1; HRMS (ESI) *m/z* calcd for C<sub>27</sub>H<sub>18</sub>ClFO<sub>3</sub>S<sub>2</sub>Na<sup>+</sup> [M+Na]<sup>+</sup> 531.0262, found 531.0264.

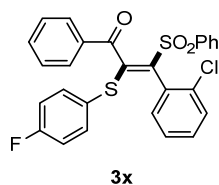

**(E)-3-(2-chlorophenyl)-2-((4-fluorophenyl)thio)-1-phenyl-3-**

**(phenylsulfonyl)prop-2-en-1-one (3x):** white solid, 199.2 mg, 98% yield; m.p. 156.6-157.5 °C; IR (cm<sup>-1</sup>): 3065, 1676, 1589, 1446, 1320, 1238, 1152, 1087, 1022, 944, 836, 771, 723, 689, 632, 576, 519, 455; <sup>1</sup>H NMR (400 MHz, Chloroform-*d*) δ 7.92 – 7.78

(m, 2H), 7.65 – 7.35 (m, 10H), 7.31 – 7.22 (m, 1H), 7.14 – 7.03 (m, 2H), 7.02 – 6.83 (m, 1H), 6.78 – 6.64 (m, 2H);  $^{13}\text{C}$  NMR (100 MHz, Chloroform-*d*)  $\delta$  189.7, 163.8 (d,  $J = 250.8$  Hz), 154.6, 139.3 (d,  $J = 8.9$  Hz), 138.7, 136.4, 135.8, 133.8, 132.0, 131.3, 130.2, 130.0, 129.2, 129.1, 129.0, 128.9, 128.5, 127.3, 121.2 (d,  $J = 3.3$  Hz), 115.9 (d,  $J = 22.0$  Hz);  $^{19}\text{F}$  NMR (376 MHz, Chloroform-*d*)  $\delta$  -109.3; HRMS (ESI)  $m/z$  calcd for  $\text{C}_{27}\text{H}_{18}\text{ClFO}_3\text{S}_2\text{Na}^+$   $[\text{M}+\text{Na}]^+$  531.0262, found 531.0263.

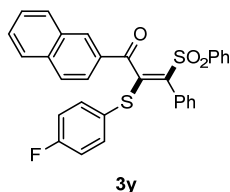

**(E)-2-((4-fluorophenyl)thio)-1-(naphthalen-2-yl)-3-phenyl-3-**

**(phenylsulfonyl)prop-2-en-1-one (3y):** white solid, 205.4 mg, 98% yield; m.p. 195.5-196.2 °C; IR ( $\text{cm}^{-1}$ ): 3059, 2924, 2854, 2360, 1895, 1671, 1625, 1589, 1489, 1446, 1398, 1353, 1319, 1277, 1225, 1184, 1149, 1085, 1070, 1030, 966, 934, 868, 835, 817, 756, 721, 698;  $^1\text{H}$  NMR (400 MHz, Chloroform-*d*)  $\delta$  8.34 (s, 1H), 7.96 (d,  $J = 7.6$  Hz, 1H), 7.89 – 7.77 (m, 3H), 7.65 – 7.53 (m, 5H), 7.48 – 7.36 (m, 5H), 7.30 (d,  $J = 4.8$  Hz, 2H), 7.10 – 7.00 (m, 2H), 6.66 – 6.57 (m, 2H);  $^{13}\text{C}$  NMR (100 MHz, Chloroform-*d*)  $\delta$  189.8, 163.8 (d,  $J = 250.7$  Hz), 152.3, 139.2 (d,  $J = 8.8$  Hz), 138.9, 136.0, 134.0, 133.9, 133.6, 132.5, 131.5, 131.3, 131.1, 130.0, 129.9, 129.0, 129.0, 128.9, 128.6, 128.0, 127.0, 124.1, 121.8 (d,  $J = 3.4$  Hz), 116.0 (d,  $J = 22.0$  Hz);  $^{19}\text{F}$  NMR (376 MHz, Chloroform-*d*)  $\delta$  -109.4; HRMS (ESI)  $m/z$  calcd for  $\text{C}_{31}\text{H}_{21}\text{FO}_3\text{S}_2\text{Na}^+$   $[\text{M}+\text{Na}]^+$  547.0808, found 547.0811.

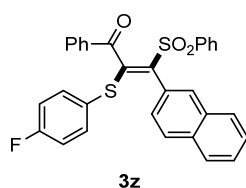

**(E)-2-((4-fluorophenyl)thio)-3-(naphthalen-2-yl)-1-phenyl-3-**

**(phenylsulfonyl)prop-2-en-1-one (3z):** yellow solid, 184.5 mg, 88% yield; m.p. 194.2-194.9 °C; IR ( $\text{cm}^{-1}$ ): 3060, 2924, 2852, 1902, 1676, 1589, 1489, 1448, 1399, 1319, 1236, 1176, 1151, 1085, 1062, 1023, 977, 932, 898, 866, 836, 815, 784, 742, 688;  $^1\text{H}$  NMR (400 MHz, Chloroform-*d*)  $\delta$  7.90 – 7.71 (m, 6H), 7.62 – 7.58 (m, 2H), 7.56 – 7.47 (m, 4H), 7.44 – 7.27 (m, 5H), 7.10 – 7.00 (m, 2H), 6.74 – 6.64 (m, 2H);  $^{13}\text{C}$  NMR (100 MHz, Chloroform-*d*)  $\delta$  190.0, 163.8 (d,  $J = 250.7$  Hz), 152.6, 139.2 (d,  $J = 8.9$  Hz), 138.9, 136.4, 133.8, 133.6, 133.5, 133.2, 131.2, 129.1, 128.9, 128.8, 128.7, 128.6,

128.5, 128.4, 127.9, 127.7, 127.4, 126.6, 121.7 (d,  $J = 3.4$  Hz), 115.9 (d,  $J = 22.0$  Hz);  $^{19}\text{F}$  NMR (376 MHz, Chloroform- $d$ )  $\delta$  -109.4; HRMS (ESI)  $m/z$  calcd for  $\text{C}_{31}\text{H}_{21}\text{FO}_3\text{S}_2\text{Na}^+$   $[\text{M}+\text{Na}]^+$  547.0808, found 547.0811.

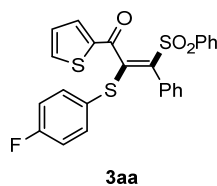

**(E)-2-((4-fluorophenyl)thio)-3-phenyl-3-(phenylsulfonyl)-1-(thiophen-2-yl)prop-2-en-1-one (3aa):** white solid, 186.3 mg, 97% yield; m.p. 163.3-163.9 °C; IR ( $\text{cm}^{-1}$ ): 3064, 2922, 1898, 1654, 1589, 1514, 1489, 1446, 1410, 1354, 1320, 1265, 1233, 1150, 1085, 1063, 1026, 924, 833, 780, 734, 698;  $^1\text{H}$  NMR (400 MHz, Chloroform- $d$ )  $\delta$  7.74 (dd,  $J = 4.0, 1.2$  Hz, 1H), 7.66 – 7.53 (m, 4H), 7.45 – 7.35 (m, 5H), 7.25 – 7.09 (m, 5H), 6.83 – 6.75 (m, 2H);  $^{13}\text{C}$  NMR (100 MHz, Chloroform- $d$ )  $\delta$  181.8, 163.9 (d,  $J = 250.8$  Hz), 151.6, 144.0, 139.2 (d,  $J = 8.9$  Hz), 138.8, 135.2, 134.6, 133.7, 133.6, 131.2, 131.0, 129.8, 128.9, 128.9, 128.2, 122.0 (d,  $J = 3.5$  Hz), 116.1 (d,  $J = 22.0$  Hz);  $^{19}\text{F}$  NMR (376 MHz, Chloroform- $d$ )  $\delta$  -109.3; HRMS (ESI)  $m/z$  calcd for  $\text{C}_{25}\text{H}_{17}\text{FO}_3\text{S}_3\text{Na}^+$   $[\text{M}+\text{Na}]^+$  503.0216, found 503.0218.

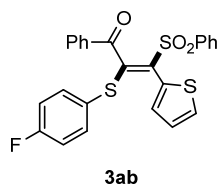

**(E)-2-((4-fluorophenyl)thio)-1-phenyl-3-(phenylsulfonyl)-3-(thiophen-2-yl)prop-2-en-1-one (3ab):** brown solid, 182.4 mg, 95% yield; m.p. 130.5-131.1 °C; IR ( $\text{cm}^{-1}$ ): 3066, 2922, 1901, 1676, 1589, 1489, 1448, 1421, 1319, 1228, 1149, 1085, 1060, 1023, 911, 834, 786, 752, 719, 687;  $^1\text{H}$  NMR (400 MHz, Chloroform- $d$ )  $\delta$  7.77 – 7.71 (m, 2H), 7.69 – 7.64 (m, 2H), 7.60 – 7.50 (m, 3H), 7.47 – 7.37 (m, 4H), 7.14 – 7.05 (m, 4H), 6.76 – 6.68 (m, 2H);  $^{13}\text{C}$  NMR (100 MHz, Chloroform- $d$ )  $\delta$  189.7, 163.9 (d,  $J = 250.9$  Hz), 155.8, 139.3 (d,  $J = 8.9$  Hz), 138.6, 136.4, 133.8, 133.7, 132.0, 130.3, 129.8, 129.1, 129.0, 128.8, 128.7, 127.4, 127.1, 121.5 (d,  $J = 3.4$  Hz), 116.0 (d,  $J = 22.1$  Hz);  $^{19}\text{F}$  NMR (376 MHz, Chloroform- $d$ )  $\delta$  -109.2; HRMS (ESI)  $m/z$  calcd for  $\text{C}_{25}\text{H}_{17}\text{FO}_3\text{S}_3\text{Na}^+$   $[\text{M}+\text{Na}]^+$  503.0216, found 503.0218.



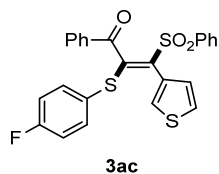

**(E)-2-((4-fluorophenyl)thio)-1-phenyl-3-(phenylsulfonyl)-3-(thiophen-3-yl)prop-2-en-1-one (3ac):** brown solid, 180.5 mg, 94% yield; m.p. 132.3-133.2 °C; IR (cm<sup>-1</sup>): 3102, 2985, 2922, 1902, 1676, 1589, 1489, 1448, 1400, 1318, 1236, 1149, 1084, 1062, 1024, 981, 890, 836, 781, 736, 687; <sup>1</sup>H NMR (400 MHz, Chloroform-*d*) δ 7.78 – 7.72 (m, 2H), 7.64 – 7.58 (m, 2H), 7.58 – 7.48 (m, 2H), 7.45 – 7.34 (m, 6H), 7.12 – 7.04 (m, 3H), 6.75 – 6.67 (m, 2H); <sup>13</sup>C NMR (100 MHz, Chloroform-*d*) δ 189.9, 163.8 (d, *J* = 250.7 Hz), 152.8, 139.3 (d, *J* = 8.9 Hz), 139.1, 136.4, 133.7, 133.6, 133.6, 130.3, 129.1, 129.0, 128.9, 128.9, 128.6, 126.2, 126.2, 121.6 (d, *J* = 3.4 Hz), 116.0 (d, *J* = 22.0 Hz); <sup>19</sup>F NMR (376 MHz, Chloroform-*d*) δ -109.3; HRMS (ESI) *m/z* calcd for C<sub>25</sub>H<sub>17</sub>FO<sub>3</sub>S<sub>3</sub>Na<sup>+</sup> [M+Na]<sup>+</sup> 503.0216, found 503.0217.

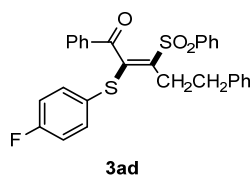

**(E)-2-((4-fluorophenyl)thio)-1,5-diphenyl-3-(phenylsulfonyl)pent-2-en-1-one (3ad):** white solid, 188.8 mg, 94% yield; m.p. 104.3-105.2 °C; IR (cm<sup>-1</sup>): 3063, 3028, 2925, 2856, 1900, 1671, 1589, 1489, 1448, 1399, 1309, 1236, 1176, 1146, 1098, 1056, 1024, 986, 869, 833, 738, 688; <sup>1</sup>H NMR (400 MHz, Chloroform-*d*) δ 7.98 (d, *J* = 7.2 Hz, 2H), 7.67 – 7.45 (m, 6H), 7.37 – 7.21 (m, 7H), 7.11 – 7.00 (m, 2H), 6.80 – 6.66 (m, 2H), 3.16 – 2.66 (m, 4H); <sup>13</sup>C NMR (100 MHz, Chloroform-*d*) δ 190.2, 163.8 (d, *J* = 250.8 Hz), 150.4, 140.6, 139.4, 139.1 (d, *J* = 8.9 Hz), 136.3, 133.7, 133.5, 132.9, 129.3, 129.1, 128.7, 128.6, 128.5, 128.4, 126.5, 121.3 (d, *J* = 3.4 Hz), 116.0 (d, *J* = 22.1 Hz), 33.6, 32.4; <sup>19</sup>F NMR (376 MHz, Chloroform-*d*) δ -109.2; HRMS (ESI) *m/z* calcd for C<sub>29</sub>H<sub>24</sub>FO<sub>3</sub>S<sub>2</sub><sup>+</sup> [M+H]<sup>+</sup> 503.1149, found 503.1139.

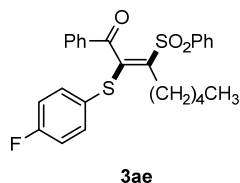

**(E)-2-((4-fluorophenyl)thio)-1-phenyl-3-(phenylsulfonyl)oct-2-en-1-one (3ae):** yellow solid, 179.8 mg, 96% yield; m.p. 67.7-68.7 °C; IR (cm<sup>-1</sup>): 3066, 2957, 2931,

2861, 1901, 1673, 1590, 1489, 1448, 1399, 1310, 1235, 1155, 1086, 1046, 1023, 936, 833, 744, 688;  $^1\text{H}$  NMR (400 MHz, Chloroform-*d*)  $\delta$  7.98 – 7.92 (m, 2H), 7.72 – 7.64 (m, 2H), 7.63 – 7.58 (m, 1H), 7.57 – 7.51 (m, 2H), 7.51 – 7.46 (m, 1H), 7.39 – 7.32 (m, 2H), 7.15 – 7.05 (m, 2H), 6.81 – 6.71 (m, 2H), 2.65 – 2.39 (m, 2H), 1.86 – 1.50 (m, 2H), 1.41 – 1.31 (m, 4H), 0.90 (t,  $J = 7.2$  Hz, 3H);  $^{13}\text{C}$  NMR (100 MHz, Chloroform-*d*)  $\delta$  190.3, 163.8 (d,  $J = 250.6$  Hz), 149.3, 139.5, 139.1 (d,  $J = 8.8$  Hz), 136.5, 134.3, 133.6, 133.5, 129.3, 129.1, 128.5, 128.5, 121.6 (d,  $J = 3.4$  Hz), 116.0 (d,  $J = 22.1$  Hz), 32.0, 30.2, 27.2, 22.2, 14.1;  $^{19}\text{F}$  NMR (376 MHz, Chloroform-*d*)  $\delta$  -109.4; HRMS (ESI)  $m/z$  calcd for  $\text{C}_{26}\text{H}_{25}\text{FO}_3\text{S}_2\text{Na}^+$   $[\text{M}+\text{Na}]^+$  491.1121, found 491.1122.

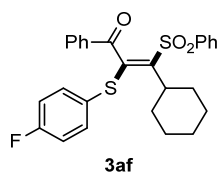

**(*E*)-3-cyclohexyl-2-((4-fluorophenyl)thio)-1-phenyl-3-(phenylsulfonyl)prop-2-en-1-one (3af):** white solid, 186.3 mg, 97% yield; m.p. 143.7-144.3 °C; IR ( $\text{cm}^{-1}$ ): 3065, 2933, 2856, 1901, 1737, 1674, 1590, 1490, 1449, 1399, 1373, 1308, 1234, 1155, 1085, 1046, 1023, 983, 931, 873, 834, 752, 689;  $^1\text{H}$  NMR (400 MHz, Chloroform-*d*)  $\delta$  8.04 – 7.96 (m, 2H), 7.68 – 7.62 (m, 2H), 7.61 – 7.51 (m, 3H), 7.50 – 7.44 (m, 1H), 7.33 (t,  $J = 7.2$  Hz, 2H), 7.13 – 7.03 (m, 2H), 6.81 – 6.73 (m, 2H), 2.88 – 2.72 (m, 1H), 2.29 – 2.14 (m, 1H), 2.04 – 1.92 (m, 1H), 1.85 – 1.52 (m, 5H), 1.28 – 1.18 (m, 3H);  $^{13}\text{C}$  NMR (100 MHz, Chloroform-*d*)  $\delta$  189.9, 163.7 (d,  $J = 250.6$  Hz), 149.5, 140.6, 139.1 (d,  $J = 8.8$  Hz), 137.9, 136.7, 133.3, 133.3, 129.1, 129.0, 128.4, 128.3, 122.1 (d,  $J = 3.4$  Hz), 116.0 (d,  $J = 22.0$  Hz), 42.0, 29.4, 26.9, 25.6;  $^{19}\text{F}$  NMR (376 MHz, Chloroform-*d*)  $\delta$  -109.5; HRMS (ESI)  $m/z$  calcd for  $\text{C}_{27}\text{H}_{25}\text{FO}_3\text{S}_2\text{Na}^+$   $[\text{M}+\text{Na}]^+$  503.1121, found 503.1123.

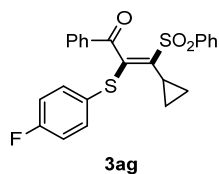

**(*E*)-3-cyclopropyl-2-((4-fluorophenyl)thio)-1-phenyl-3-(phenylsulfonyl)prop-2-en-1-one (3ag):** white solid, 157.7 mg, 90% yield; m.p. 70.8-71.5 °C; IR ( $\text{cm}^{-1}$ ): 3065, 3012, 2925, 1902, 1673, 1589, 1489, 1448, 1399, 1308, 1236, 1157, 1086, 1023, 913, 880, 836, 753, 688;  $^1\text{H}$  NMR (400 MHz, Chloroform-*d*)  $\delta$  7.94 (d,  $J = 7.6$  Hz, 2H), 7.66 – 7.42 (m, 6H), 7.39 – 7.28 (m, 2H), 7.18 – 6.97 (m, 2H), 6.84 – 6.61 (m, 2H), 1.48 –

1.34 (m, 1H), 1.26 (s, 1H), 0.94 (s, 2H), 0.79 (s, 1H);  $^{13}\text{C}$  NMR (100 MHz, Chloroform-*d*)  $\delta$  189.8, 163.7 (d,  $J = 250.5$  Hz), 154.2, 140.5, 139.3 (d,  $J = 8.8$  Hz), 136.5, 133.4, 131.5, 129.1, 129.0, 128.4, 128.2, 121.9 (d,  $J = 3.4$  Hz), 115.8 (d,  $J = 22.0$  Hz), 10.5, 8.5, 7.8;  $^{19}\text{F}$  NMR (376 MHz, Chloroform-*d*)  $\delta$  -109.6; HRMS (ESI)  $m/z$  calcd for  $\text{C}_{24}\text{H}_{19}\text{FO}_3\text{S}_2\text{Na}^+ [\text{M}+\text{Na}]^+$  461.0651, found 461.0655.

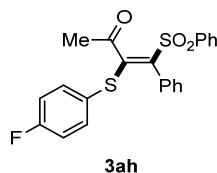

**(*E*)-3-((4-fluorophenyl)thio)-4-phenyl-4-(phenylsulfonyl)but-3-en-2-one (3ah):** yellow solid, 150.0 mg, 91% yield; m.p. 174.5-175.5 °C; IR ( $\text{cm}^{-1}$ ): 3064, 1907, 1707, 1588, 1489, 1446, 1352, 1318, 1225, 1187, 1149, 1085, 988, 960, 835, 802, 757, 717, 697;  $^1\text{H}$  NMR (400 MHz, Chloroform-*d*)  $\delta$  7.65 – 7.54 (m, 3H), 7.47 – 7.30 (m, 7H), 7.15 – 6.95 (m, 4H), 2.24 (s, 3H);  $^{13}\text{C}$  NMR (100 MHz, Chloroform-*d*)  $\delta$  197.3, 164.0 (d,  $J = 251.1$  Hz), 153.8, 138.8, 138.5 (d,  $J = 8.8$  Hz), 133.7, 132.5, 130.9, 130.8, 129.7, 129.0, 128.8, 128.7, 122.7 (d,  $J = 3.4$  Hz), 116.8 (d,  $J = 22.0$  Hz), 32.1;  $^{19}\text{F}$  NMR (376 MHz, Chloroform-*d*)  $\delta$  -108.9; HRMS (ESI)  $m/z$  calcd for  $\text{C}_{22}\text{H}_{17}\text{FO}_3\text{S}_2\text{Na}^+ [\text{M}+\text{Na}]^+$  435.0495, found 435.0496.

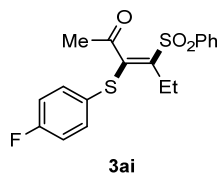

**(*E*)-3-((4-fluorophenyl)thio)-4-(phenylsulfonyl)hex-3-en-2-one (3ai):** yellow solid, 135.4 mg, 93% yield; m.p. 109.3-110.3 °C; IR ( $\text{cm}^{-1}$ ): 3068, 2975, 2936, 2877, 1904, 1705, 1590, 1490, 1447, 1400, 1352, 1308, 1230, 1195, 1158, 1131, 1082, 1014, 978, 947, 836, 742, 688;  $^1\text{H}$  NMR (400 MHz, Chloroform-*d*)  $\delta$  7.98 – 7.89 (m, 2H), 7.66 – 7.60 (m, 1H), 7.59 – 7.53 (m, 2H), 7.49 – 7.40 (m, 2H), 7.10 – 7.03 (m, 2H), 2.46 (q,  $J = 7.2$  Hz, 2H), 2.19 (s, 3H), 1.10 (t,  $J = 7.2$  Hz, 3H);  $^{13}\text{C}$  NMR (100 MHz, Chloroform-*d*)  $\delta$  197.5, 163.9 (d,  $J = 250.7$  Hz), 150.7, 139.5, 138.0 (d,  $J = 8.8$  Hz), 134.3, 133.7, 129.4, 128.4, 122.6 (d,  $J = 3.4$  Hz), 116.8 (d,  $J = 22.1$  Hz), 31.7, 23.4, 12.5;  $^{19}\text{F}$  NMR (376 MHz, Chloroform-*d*)  $\delta$  -109.1; HRMS (ESI)  $m/z$  calcd for  $\text{C}_{18}\text{H}_{17}\text{FO}_3\text{S}_2\text{Na}^+ [\text{M}+\text{Na}]^+$  387.0495, found 387.0499.

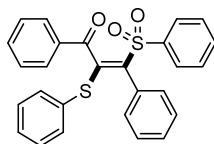

3aj

**(E)-1,3-diphenyl-3-(phenylsulfonyl)-2-(phenylthio)prop-2-en-1-one (3aj):** yellow solid, 178.8 mg, 98% yield; m.p. 111.7-112.5 °C; IR (cm<sup>-1</sup>): 3061, 2926, 1901, 1676, 1581, 1474, 1447, 1319, 1252, 1215, 1149, 1086, 1062, 1024, 1001, 945, 848, 815, 750, 721, 698; <sup>1</sup>H NMR (400 MHz, Chloroform-*d*) δ 7.81 – 7.72 (m, 2H), 7.64 – 7.59 (m, 2H), 7.59 – 7.54 (m, 1H), 7.53 – 7.48 (m, 1H), 7.46 – 7.34 (m, 7H), 7.28 – 7.21 (m, 2H), 7.20 – 7.14 (m, 1H), 7.11 – 7.16 (m, 2H), 7.04 – 6.98 (m, 2H); <sup>13</sup>C NMR (100 MHz, Chloroform-*d*) δ 190.0, 152.7, 139.0, 137.2, 136.5, 133.6, 133.5, 133.5, 131.4, 131.2, 130.1, 129.8, 129.2, 128.9, 128.9, 128.7, 128.5, 126.5; HRMS (ESI) m/z calcd for C<sub>27</sub>H<sub>20</sub>O<sub>3</sub>S<sub>2</sub>Na<sup>+</sup> [M+Na]<sup>+</sup> 479.0746, found 479.0745.

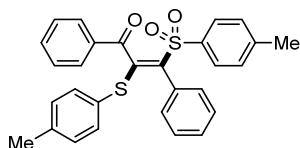

3ak

**(E)-1,3-diphenyl-2-(p-tolylthio)-3-tosylprop-2-en-1-one (3ak):** yellow solid, 189.8 mg, 98% yield; m.p. 158.0-158.9 °C; IR (cm<sup>-1</sup>): 3061, 2926, 2866, 1896, 1675, 1595, 1492, 1446, 1399, 1318, 1246, 1216, 1148, 1088, 1016, 944, 817, 769, 740, 697, 638, 595, 574, 506, 429; <sup>1</sup>H NMR (400 MHz, Chloroform-*d*) δ 7.72 – 7.66 (m, 2H), 7.42 – 7.36 (m, 3H), 7.33 – 7.24 (m, 5H), 7.16 (d, *J* = 10.0 Hz, 2H), 7.09 (d, *J* = 8.0 Hz, 2H), 6.85 (d, *J* = 8.0 Hz, 2H), 6.70 (d, *J* = 7.6 Hz, 2H), 2.28 (s, 3H), 2.08 (s, 3H); <sup>13</sup>C NMR (100 MHz, Chloroform-*d*) δ 190.0, 152.4, 144.4, 140.3, 136.9, 136.5, 136.0, 133.3, 131.4, 131.0, 129.5, 129.4, 129.4, 129.0, 128.7, 128.3, 122.8, 21.6, 21.2; HRMS (ESI) m/z calcd for C<sub>29</sub>H<sub>24</sub>O<sub>3</sub>S<sub>2</sub>Na<sup>+</sup> [M+Na]<sup>+</sup> 507.1059, found 507.1061.

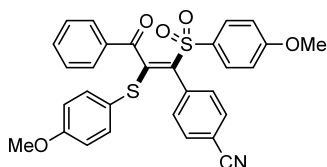

3al

**(E)-4-(1-((4-methoxyphenyl)sulfonyl)-2-((4-methoxyphenyl)thio)-3-oxo-3-phenylprop-1-en-1-yl)benzotrile (3al):** yellow solid, 199.1 mg, 92% yield; m.p. 175.7-176.2 °C; IR (cm<sup>-1</sup>): 3060, 2943, 2842, 2230, 1902, 1679, 1592, 1495, 1449, 1408, 1321, 1301, 1254, 1175, 1146, 1087, 1064, 1025, 945, 861, 837, 800, 773, 736, 689;

$^1\text{H}$  NMR (400 MHz, Chloroform-*d*)  $\delta$  7.78 – 7.73 (m, 2H), 7.70 (d,  $J = 8.8$  Hz, 2H), 7.54 – 7.47 (m, 3H), 7.45 – 7.34 (m, 4H), 6.99 – 6.92 (m, 2H), 6.692 – 6.85 (m, 2H), 6.56 – 6.48 (m, 2H), 3.82 (s, 3H), 3.66 (s, 3H);  $^{13}\text{C}$  NMR (100 MHz, Chloroform-*d*)  $\delta$  189.9, 163.8, 161.2, 153.4, 138.6, 136.4, 136.3, 133.6, 132.5, 132.0, 131.7, 130.9, 130.1, 129.0, 128.5, 118.3, 115.8, 114.4, 114.3, 113.3, 55.7, 55.3; HRMS (ESI)  $m/z$  calcd for  $\text{C}_{30}\text{H}_{23}\text{NO}_5\text{S}_2\text{Na}^+$   $[\text{M}+\text{Na}]^+$  564.0909, found 564.0911.

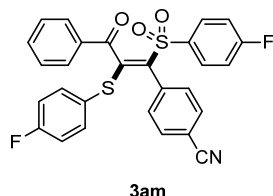

**(*E*)-4-(1-((4-fluorophenyl)sulfonyl)-2-((4-fluorophenyl)thio)-3-oxo-3-phenylprop-1-en-1-yl)benzotrile (3am):** yellow solid, 200.6 mg, 97% yield; m.p. 216.2-216.9 °C; IR ( $\text{cm}^{-1}$ ): 3095, 3066, 2234, 1900, 1658, 1587, 1487, 1449, 1399, 1328, 1232, 1145, 1082, 1007, 944, 836, 723, 685, 643, 577, 522, 489;  $^1\text{H}$  NMR (400 MHz, Chloroform-*d*)  $\delta$  7.78 – 7.69 (m, 4H), 7.65 – 7.59 (m, 2H), 7.58 – 7.53 (m, 1H), 7.47 – 7.35 (m, 4H), 7.18 – 7.11 (m, 2H), 7.08 – 7.01 (m, 2H), 6.77 – 6.69 (m, 2H);  $^{13}\text{C}$  NMR (100 MHz, Chloroform-*d*)  $\delta$  189.7, 165.9 (d,  $J = 255.8$  Hz), 164.0 (d,  $J = 251.6$  Hz), 154.1, 139.3 (d,  $J = 8.9$  Hz), 136.1, 135.8, 134.6 (d,  $J = 3.0$  Hz), 134.1, 132.8, 132.1, 131.6 (d,  $J = 9.4$  Hz), 129.1, 128.8, 120.8 (d,  $J = 3.4$  Hz), 118.2, 116.5 (d,  $J = 22.5$  Hz), 116.2 (d,  $J = 22.2$  Hz), 113.9;  $^{19}\text{F}$  NMR (376 MHz, Chloroform-*d*)  $\delta$  -102.6, -108.5; HRMS (ESI)  $m/z$  calcd for  $\text{C}_{28}\text{H}_{17}\text{F}_2\text{NO}_3\text{S}_2\text{Na}^+$   $[\text{M}+\text{Na}]^+$  540.0510, found 540.0512.

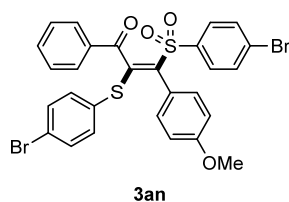

**(*E*)-3-((4-bromophenyl)sulfonyl)-2-((4-bromophenyl)thio)-3-(4-methoxyphenyl)-1-phenylprop-2-en-1-one (3an):** yellow solid, 241.4 mg, 94% yield; m.p. 165.8-166.4 °C; IR ( $\text{cm}^{-1}$ ): 3062, 2928, 2835, 1675, 1604, 1575, 1504, 1470, 1386, 1320, 1252, 1148, 1068, 1010, 947, 821, 783, 737, 687, 599, 578, 486, 411;  $^1\text{H}$  NMR (400 MHz, Chloroform-*d*)  $\delta$  7.77 – 7.71 (m, 2H), 7.59 – 7.55 (m, 2H), 7.55 – 7.51 (m, 1H), 7.47 – 7.42 (m, 2H), 7.42 – 7.37 (m, 2H), 7.22 – 7.16 (m, 2H), 7.16 – 7.12 (m, 2H), 6.97 – 6.90 (m, 4H), 3.85 (s, 3H);  $^{13}\text{C}$  NMR (100 MHz, Chloroform-*d*)  $\delta$  190.0, 160.9, 152.7, 138.5, 138.2, 136.3, 133.9, 133.2, 132.5, 132.3, 132.0, 130.4, 129.2, 128.9, 128.7, 125.6,

125.3, 122.7, 114.6, 55.4; HRMS (ESI)  $m/z$  calcd for  $C_{28}H_{20}Br_2O_4S_2Na^+$   $[M+Na]^+$  666.9042, found 666.9041.

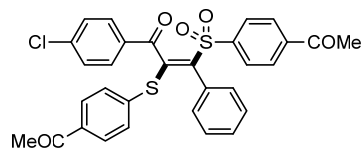

3ao

**(E)-3-((4-acetylphenyl)sulfonyl)-2-((4-acetylphenyl)thio)-1-(4-chlorophenyl)-3-phenylprop-2-en-1-one (3ao):** white solid, 222.7 mg, 97% yield; m.p. 182.3-182.9 °C; IR ( $cm^{-1}$ ): 3062, 2922, 2360, 2342, 1734, 1685, 1587, 1487, 1423, 1397, 1358, 1323, 1259, 1152, 1088, 1064, 1013, 958, 826, 697;  $^1H$  NMR (400 MHz, Chloroform-*d*)  $\delta$  8.03 – 7.97 (m, 2H), 7.74 – 7.68 (m, 4H), 7.67 – 7.62 (m, 2H), 7.48 – 7.36 (m, 5H), 7.26 – 7.18 (m, 4H), 2.65 (s, 3H), 2.52 (s, 3H);  $^{13}C$  NMR (100 MHz, Chloroform-*d*)  $\delta$  197.1, 197.0, 188.4, 151.9, 142.5, 140.8, 140.5, 137.9, 136.8, 134.7, 134.5, 132.3, 131.0, 130.6, 130.5, 130.2, 129.2, 129.2, 129.1, 128.7, 128.5, 27.1, 26.8; HRMS (ESI)  $m/z$  calcd for  $C_{31}H_{23}ClO_5S_2Na^+$   $[M+Na]^+$  597.0567, found 597.0568.

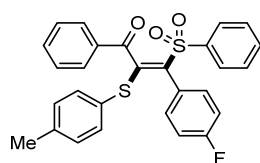

3ap

**(E)-3-(4-fluorophenyl)-1-phenyl-3-(phenylsulfonyl)-2-(p-tolylthio)prop-2-en-1-one (3ap):** yellow solid, 191.3 mg, 98% yield; m.p. 137.9-168.5 °C; IR ( $cm^{-1}$ ): 3067, 2925, 1904, 1676, 1589, 1488, 1448, 1396, 1320, 1236, 1150, 1086, 1015, 940, 837, 799, 755, 722, 688;  $^1H$  NMR (400 MHz, Chloroform-*d*)  $\delta$  7.79 – 7.72 (m, 2H), 7.62 – 7.57 (m, 2H), 7.57 – 7.52 (m, 1H), 7.52 – 7.46 (t(m), 1H), 7.44 – 7.33 (m, 4H), 7.28 – 7.18 (m, 2H), 7.12 – 7.05 (m, 2H), 6.94 (d,  $J = 8.0$  Hz, 2H), 6.80 (d,  $J = 7.6$  Hz, 2H), 2.17 (s, 3H);  $^{13}C$  NMR (100 MHz, Chloroform-*d*)  $\delta$  189.9, 163.4 (d,  $J = 248.7$  Hz), 153.9, 140.6, 138.8, 137.0, 136.4, 133.6, 133.5, 133.2 (d,  $J = 8.5$  Hz), 131.9, 129.5, 129.1, 128.9, 128.7, 128.4, 127.2 (d,  $J = 3.3$  Hz), 122.5, 116.0 (d,  $J = 21.6$  Hz), 21.2;  $^{19}F$  NMR (376 MHz, Chloroform-*d*)  $\delta$  -110.6; HRMS (ESI)  $m/z$  calcd for  $C_{28}H_{21}FO_3S_2Na^+$   $[M+Na]^+$  511.0808, found 511.0811.

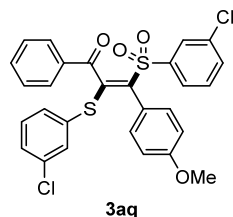

**(E)-3-((3-chlorophenyl)sulfonyl)-2-((3-chlorophenyl)thio)-3-(4-methoxyphenyl)-1-phenylprop-2-en-1-one (3aq):** yellow solid, 206.1 mg, 93% yield; m.p. 143.1-143.8 °C; IR (cm<sup>-1</sup>): 3064, 2932, 2839, 1902, 1676, 1605, 1571, 1506, 1461, 1402, 1323, 1294, 1252, 1219, 1174, 1152, 1110, 1082, 1062, 1026, 947, 885, 855, 778, 736, 680; <sup>1</sup>H NMR (400 MHz, Chloroform-*d*) δ 7.78 – 7.72 (m, 2H), 7.57 – 7.47 (m, 4H), 7.43 – 7.34 (m, 3H), 7.19 (d, *J* = 7.6 Hz, 2H), 7.16 – 7.12 (m, 1H), 7.05 – 7.01 (m, 2H), 7.01 – 6.97 (m, 1H), 6.97 – 6.94 (m, 2H), 3.84 (s, 3H); <sup>13</sup>C NMR (100 MHz, Chloroform-*d*) δ 189.6, 160.9, 152.9, 140.7, 136.8, 136.2, 135.3, 135.1, 134.2, 133.9, 133.7, 133.1, 132.5, 130.4, 130.2, 129.8, 129.1, 128.7, 128.2, 127.0, 122.5, 114.5, 55.4; HRMS (ESI) *m/z* calcd for C<sub>28</sub>H<sub>20</sub>Cl<sub>2</sub>O<sub>4</sub>S<sub>2</sub>Na<sup>+</sup> [M+Na]<sup>+</sup> 577.0072, found 577.0076.

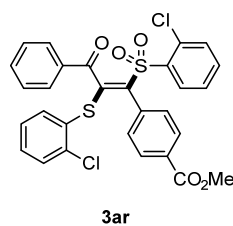

**methyl (E)-4-(1-((2-chlorophenyl)sulfonyl)-2-((2-chlorophenyl)thio)-3-oxo-3-phenylprop-1-en-1-yl)benzoate (3ar):** yellow solid, 221.2 mg, 95% yield; m.p. 105.3-106.0 °C; IR (cm<sup>-1</sup>): 3062, 2921, 1723, 1676, 1576, 1489, 1448, 1398, 1321, 1276, 1151, 1108, 1061, 1039, 992, 939, 866, 758, 701; <sup>1</sup>H NMR (400 MHz, Chloroform-*d*) δ 7.99 (d, *J* = 8.4 Hz, 2H), 7.88 – 7.84 (m, 2H), 7.71 – 7.67 (m, 1H), 7.59 (d, *J* = 7.6 Hz, 2H), 7.53 – 7.47 (m, 1H), 7.42 – 7.34 (m, 4H), 7.20 (dd, *J* = 7.6, 1.6 Hz, 1H), 7.18 – 7.10 (m, 3H), 6.99 – 6.93 (m, 1H), 3.87 (s, 3H); <sup>13</sup>C NMR (100 MHz, Chloroform-*d*) δ 187.9, 166.3, 150.7, 140.5, 139.0, 135.7, 135.5, 135.4, 134.9, 133.7, 133.5, 133.3, 132.0, 131.9, 131.5, 131.2, 130.4, 130.0, 129.9, 129.0, 128.4, 127.0, 127.0, 125.7, 52.3; HRMS (ESI) *m/z* calcd for C<sub>29</sub>H<sub>20</sub>Cl<sub>2</sub>O<sub>5</sub>S<sub>2</sub>Na<sup>+</sup> [M+Na]<sup>+</sup> 605.0021, found 605.0026.

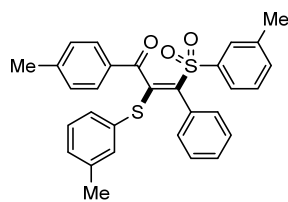

3as

**(E)-3-phenyl-1-(p-tolyl)-3-(m-tolylsulfonyl)-2-(m-tolylthio)prop-2-en-1-one (3as):** white solid, 185.3 mg, 93% yield; m.p. 157.8-158.7 °C; IR (cm<sup>-1</sup>): 3055, 2921, 2856, 1895, 1674, 1604, 1571, 1475, 1443, 1408, 1320, 1255, 1215, 1176, 1145, 1084, 1063, 998, 942, 868, 784, 735, 699; <sup>1</sup>H NMR (400 MHz, Chloroform-*d*) δ 7.66 (d, *J* = 8.0 Hz, 2H), 7.43 – 7.33 (m, 6H), 7.32 – 7.28 (m, 1H), 7.28 – 7.26 (m, 1H), 7.24 (s, 1H), 7.18 (d, *J* = 8.0 Hz, 2H), 6.98 – 6.92 (m, 3H), 6.84 (s, 1H), 2.40 (s, 3H), 2.33 (s, 3H), 2.05 (s, 3H); <sup>13</sup>C NMR (100 MHz, Chloroform-*d*) δ 189.6, 152.8, 144.3, 139.0, 139.0, 138.5, 138.0, 134.5, 134.2, 134.2, 133.1, 131.6, 131.2, 130.8, 129.6, 129.4, 129.2, 129.2, 128.8, 128.7, 128.6, 126.3, 126.1, 21.9, 21.4, 20.9; HRMS (ESI) *m/z* calcd for C<sub>30</sub>H<sub>26</sub>O<sub>3</sub>S<sub>2</sub>Na<sup>+</sup> [M+Na]<sup>+</sup> 521.1215, found 521.1217.

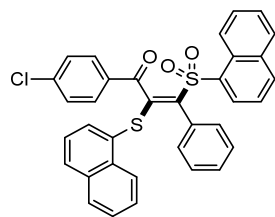

3at

**(E)-3-(naphthalen-1-ylsulfonyl)-2-(naphthalen-1-ylthio)-1,3-diphenylprop-2-en-1-one (3at):** white solid, 218.0 mg, 98% yield; m.p. 257.0-257.8 °C; IR (cm<sup>-1</sup>): 3052, 1671, 1584, 1502, 1485, 1442, 1399, 1300, 1252, 1213, 1153, 1118, 1062, 1010, 946, 803, 769, 699, 631, 583, 505, 427; <sup>1</sup>H NMR (400 MHz, Chloroform-*d*) δ 8.58 (d, *J* = 8.4 Hz, 1H), 8.03 – 7.98 (m, 1H), 7.93 (d, *J* = 8.0 Hz, 1H), 7.86 – 7.77 (m, 2H), 7.69 – 7.47 (m, 6H), 7.42 – 7.34 (m, 3H), 7.33 – 7.00 (m, 10H); <sup>13</sup>C NMR (100 MHz, Chloroform-*d*) δ 188.9, 150.7, 139.6, 138.1, 135.4, 135.4, 135.3, 134.4, 133.8, 133.8, 133.3, 131.8, 131.7, 131.3, 130.5, 130.2, 129.7, 129.4, 128.9, 128.8, 128.6, 128.5, 127.3, 127.0, 126.6, 125.9, 125.2, 124.7, 124.2, 123.9; HRMS (ESI) *m/z* calcd for C<sub>35</sub>H<sub>23</sub>O<sub>3</sub>ClS<sub>2</sub>Na<sup>+</sup> [M+Na]<sup>+</sup> 613.0669, found 613.0670.

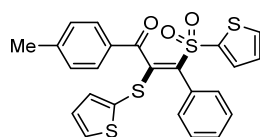

3au



**(E)-3-phenyl-3-(thiophen-2-ylsulfonyl)-2-(thiophen-2-ylthio)-1-(p-tolyl)prop-2-en-1-one (3au):** yellow solid, 183.2 mg, 95% yield; m.p. 197.9-198.5 °C; IR (cm<sup>-1</sup>): 3097, 2929, 2849, 1903, 1677, 1606, 1506, 1449, 1400, 1322, 1252, 1222, 1174, 1147, 1085, 1062, 1015, 946, 849, 781, 703, 688; <sup>1</sup>H NMR (400 MHz, Chloroform-*d*) δ 7.87 – 7.80 (m, 2H), 7.61 (dd, *J* = 4.8, 1.2 Hz, 1H), 7.56 – 7.50 (m, 1H), 7.44 – 7.38 (m, 2H), 7.37 – 7.33 (m, 1H), 7.29 – 7.22 (m, 3H), 7.02 (dd, *J* = 4.8, 4.0 Hz, 1H), 6.96 (d, *J* = 8.8 Hz, 2H), 6.80 (dd, *J* = 3.6, 1.2 Hz, 1H), 6.74 – 6.69 (m, 1H), 3.85 (s, 3H); <sup>13</sup>C NMR (100 MHz, Chloroform-*d*) δ 189.6, 160.9, 152.2, 140.1, 140.1, 136.4, 135.1, 134.6, 133.9, 133.7, 133.7, 132.5, 129.2, 128.6, 127.8, 127.5, 123.2, 122.6, 114.5, 55.4; HRMS (ESI) *m/z* calcd for C<sub>24</sub>H<sub>18</sub>O<sub>4</sub>S<sub>4</sub>Na<sup>+</sup> [M+Na]<sup>+</sup> 520.9980, found 520.9983.

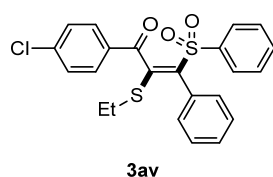

**(E)-1-(4-chlorophenyl)-2-(ethylthio)-3-phenyl-3-(phenylsulfonyl)prop-2-en-1-one (3av):** yellow solid, 171.5 mg, 97% yield; mp: 139.0-139.7 °C; IR (cm<sup>-1</sup>): 3062, 2972, 2937, 2877, 1677, 1583, 1488, 1445, 1402, 1307, 1247, 1148, 1088, 1010, 942, 808, 731, 688, 602, 581, 538, 478; <sup>1</sup>H NMR (400 MHz, Chloroform-*d*) δ 8.13 – 8.07 (m, 2H), 7.57 – 7.50 (m, 5H), 7.40 – 7.31 (m, 5H), 7.10 (d, *J* = 6.8 Hz, 2H), 2.62 – 2.51 (m, 1H), 2.39 – 2.28 (m, 1H), 1.02 (t, *J* = 7.6 Hz, 3H); <sup>13</sup>C NMR (100 MHz, Chloroform-*d*) δ 189.3, 150.8, 140.5, 138.7, 134.6, 134.5, 133.5, 131.2, 130.9, 130.5, 129.6, 129.5, 128.8, 128.7, 128.6, 26.4, 13.7; HRMS (ESI) *m/z* calcd for C<sub>23</sub>H<sub>19</sub>ClO<sub>3</sub>S<sub>2</sub>Na<sup>+</sup> [M+Na]<sup>+</sup> 465.0356, found 465.0358.

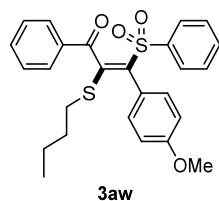

**(E)-2-(butylthio)-3-(4-methoxyphenyl)-1-phenyl-3-(phenylsulfonyl)prop-2-en-1-one (3aw):** yellow solid, 177.1 mg, 95% yield; m.p. 146.2-147.0 °C; IR (cm<sup>-1</sup>): 2957, 2929, 2870, 1675, 1606, 1505, 1447, 1308, 1250, 1174, 1148, 1086, 1025, 953, 862, 755, 723, 688; <sup>1</sup>H NMR (400 MHz, Chloroform-*d*) δ 8.19 – 8.12 (m, 2H), 7.67 – 7.61 (m, 1H), 7.58 – 7.47 (m, 5H), 7.39 – 7.32 (m, 2H), 7.05 (d, *J* = 8.0 Hz, 2H), 6.86 (d, *J* = 9.2 Hz, 2H), 3.78 (s, 3H), 2.60 – 2.51 (m, 1H), 2.36 – 2.26 (m, 1H), 1.39 – 1.25 (m, 2H), 1.20 – 1.09 (m, 2H), 0.69 (t, *J* = 7.3 Hz, 3H); <sup>13</sup>C NMR (100 MHz, Chloroform-

d)  $\delta$  190.6, 160.4, 151.7, 139.0, 136.2, 134.1, 133.6, 133.3, 132.4, 129.1, 129.0, 128.7, 128.6, 123.4, 114.2, 55.2, 31.6, 30.6, 21.6, 13.4; HRMS (ESI)  $m/z$  calcd for  $C_{26}H_{26}O_4S_2Na^+$   $[M+Na]^+$  489.1164, found 489.1167.

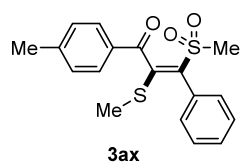

**(E)-3-(methylsulfonyl)-2-(methylthio)-3-phenyl-1-(p-tolyl)prop-2-en-1-one (3ax):** white solid, 123.2 mg, 89% yield; m.p. 166.2-166.9 °C; IR ( $cm^{-1}$ ): 3062, 2925, 2851, 1672, 1603, 1573, 1490, 1432, 1308, 1253, 1218, 1177, 1138, 1077, 1030, 964, 811, 780, 739, 699;  $^1H$  NMR (400 MHz, Chloroform-*d*)  $\delta$  7.97 (d,  $J = 8.4$  Hz, 2H), 7.58 – 7.46 (m, 5H), 7.34 (d,  $J = 8.0$  Hz, 2H), 2.81 (s, 3H), 2.44 (s, 3H), 1.99 (s, 3H);  $^{13}C$  NMR (100 MHz, Chloroform-*d*)  $\delta$  190.1, 153.1, 145.5, 133.8, 133.2, 131.8, 130.7, 130.0, 129.4, 129.2, 42.1, 22.0, 14.9; HRMS (ESI)  $m/z$  calcd for  $C_{18}H_{18}O_3S_2Na^+$   $[M+Na]^+$  369.0589, found 369.0593.

## 6. Optimization of reaction conditions for the synthesis of product 5a

The study commenced with the reaction of ynone **1a** and thiosulfonate **4a**. However, with 10 mol%  $Cs_2CO_3$  as catalyst, no desired product was obtained (Table S2, entry 1). Increasing the amount of  $Cs_2CO_3$  cannot promote the reaction (Table S2, entry 2). When DBU was used for the reaction, the desired product was isolated in 14% yield (Table S2, entry 3). Other common bases, such as triethylamine, DIPEA, DABCO, DBN and  $tBuOK$ , cannot catalyze the reaction (Table S2, entries 4-8). Interestingly,  $K_3PO_4$  catalyzed the reaction to give **5o** in 18% yield (Table S2, entry 9). The subsequent evaluation of reaction media revealed that dimethyl carbonate give the desired product in 30% yield (Table S2, entries 10-18). Increasing the amount of  $K_3PO_4$  to 0.8 equiv. can improve the reaction yield to 77% (Table S2, entries 19 and 20). However, further increasing  $K_3PO_4$  did not give a better yield (Table S2, entry 21).

**Table S2.** Optimization of reaction conditions <sup>a</sup>

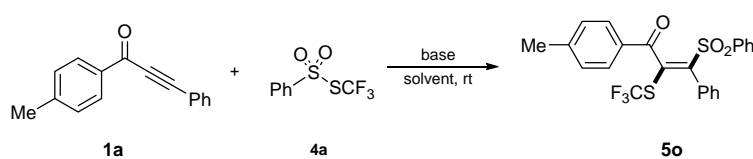

| entry | base                                    | solvent            | E/Z <sup>c</sup> | yield (%) <sup>b</sup> |
|-------|-----------------------------------------|--------------------|------------------|------------------------|
| 1     | 10 mol% Cs <sub>2</sub> CO <sub>3</sub> | CH <sub>3</sub> CN | /                | trace                  |
| 2     | 50 mol% Cs <sub>2</sub> CO <sub>3</sub> | CH <sub>3</sub> CN | /                | trace                  |
| 3     | 10 mol% DBU                             | CH <sub>3</sub> CN | >25:1            | 14                     |
| 4     | 10 mol% Et <sub>3</sub> N               | CH <sub>3</sub> CN | /                | trace                  |
| 5     | 10 mol% DIPEA                           | CH <sub>3</sub> CN | /                | trace                  |
| 6     | 10 mol% DABCO                           | CH <sub>3</sub> CN | /                | trace                  |
| 7     | 10 mol% DBN                             | CH <sub>3</sub> CN | /                | trace                  |
| 8     | 10 mol% <sup>t</sup> BuOK               | CH <sub>3</sub> CN | /                | trace                  |
| 9     | 10 mol% K <sub>3</sub> PO <sub>4</sub>  | CH <sub>3</sub> CN | >25:1            | 18                     |
| 10    | 10 mol% K <sub>3</sub> PO <sub>4</sub>  | toluene            | /                | trace                  |
| 11    | 10 mol% K <sub>3</sub> PO <sub>4</sub>  | MeOH               | >25:1            | 27                     |
| 12    | 10 mol% K <sub>3</sub> PO <sub>4</sub>  | DCM                | /                | trace                  |
| 13    | 10 mol% K <sub>3</sub> PO <sub>4</sub>  | THF                | /                | trace                  |
| 14    | 10 mol% K <sub>3</sub> PO <sub>4</sub>  | DMF                | /                | trace                  |
| 15    | 10 mol% K <sub>3</sub> PO <sub>4</sub>  | DMSO               | /                | trace                  |
| 16    | 10 mol% K <sub>3</sub> PO <sub>4</sub>  | 1,4-dioxane        | >25:1            | 21                     |
| 17    | 10 mol% K <sub>3</sub> PO <sub>4</sub>  | DMC                | >25:1            | 30                     |
| 18    | 10 mol% K <sub>3</sub> PO <sub>4</sub>  | EtOAc              | >25:1            | 22                     |
| 19    | 50 mol% K <sub>3</sub> PO <sub>4</sub>  | DMC                | >25:1            | 67                     |
| 20    | 80 mol% K <sub>3</sub> PO <sub>4</sub>  | DMC                | >25:1            | 77                     |
| 21    | 100 mol% K <sub>3</sub> PO <sub>4</sub> | DMC                | >25:1            | 75                     |

<sup>a</sup> Reaction conditions: **1a** (0.15 mmol), **4a** (0.1 mmol), solvent (1.0 mL), 24 h, rt; <sup>b</sup> Isolated yield; <sup>c</sup> Ratio of *E/Z* isomers was determined by <sup>1</sup>H NMR analysis of the crude products.

## 7. General procedure for synthesis of products **5**

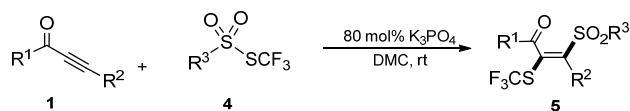

To an oven-dried 10 mL Schlenk tube equipped with a stir bar was added ynone **1** (0.15 mmol), thiosulfonate **4** (0.1 mmol), anhydrous K<sub>3</sub>PO<sub>4</sub> (80 mol%) and 0.5 mL of

dimethyl carbonate. Then the reaction mixture was stirred at room temperature until **4** was consumed completely which was monitored by TLC. The solvent was evaporated, then the crude product was purified by column chromatography on silica gel (200~300 mesh) using ethyl acetate in petroleum ether (v/v = 20:1) as the eluent to afford the corresponding product **5**.

## 8. Single-crystal X-ray structure analysis **5j**

**Figure S2.** Crystal structure of **5j**

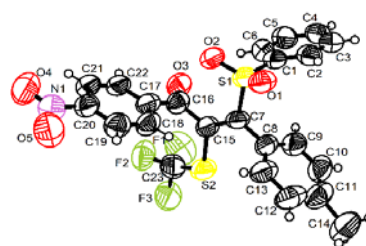

**Table S3.** Crystal data and structure refinement for **5j**

|                        |                                                                               |                 |
|------------------------|-------------------------------------------------------------------------------|-----------------|
| Identification code    | <b>5j</b>                                                                     |                 |
| Empirical formula      | C <sub>23</sub> H <sub>16</sub> F <sub>3</sub> NO <sub>5</sub> S <sub>2</sub> |                 |
| Formula weight         | 507.49                                                                        |                 |
| Temperature            | 296.15 K                                                                      |                 |
| Wavelength             | 1.54178 Å                                                                     |                 |
| Crystal system         | Triclinic                                                                     |                 |
| Space group            | P-1                                                                           |                 |
| Unit cell dimensions   | a = 10.3165(7) Å                                                              | α = 82.618(5)°. |
|                        | b = 11.1602(9) Å                                                              | β = 70.573(4)°. |
|                        | c = 11.5520(7) Å                                                              | γ = 63.536(5)°. |
| Volume                 | 1122.57(15) Å <sup>3</sup>                                                    |                 |
| Z                      | 2                                                                             |                 |
| Density (calculated)   | 1.501 Mg/m <sup>3</sup>                                                       |                 |
| Absorption coefficient | 2.709 mm <sup>-1</sup>                                                        |                 |
| F (000)                | 520                                                                           |                 |

|                                   |                                                |
|-----------------------------------|------------------------------------------------|
| Crystal size                      | 0.14 x 0.12 x 0.11 mm <sup>3</sup>             |
| Theta range for data collection   | 4.059 to 67.495°.                              |
| Index ranges                      | -11 ≤ h ≤ 12, -11 ≤ k ≤ 13,<br>-13 ≤ l ≤ 13    |
| Reflections collected             | 11762                                          |
| Independent reflections           | 3993 [R(int) = 0.0747]                         |
| Completeness to theta = 67.495°   | 98.6 %                                         |
| Absorption correction             | Semi-empirical from<br>equivalents             |
| Max. and min. transmission        | 0.7536 and 0.5013                              |
| Refinement method                 | Full-matrix least-squares<br>on F <sup>2</sup> |
| Data / restraints / parameters    | 3993 / 0 / 295                                 |
| Goodness-of-fit on F <sup>2</sup> | 1.111                                          |
| Final R indices [I > 2σ(I)]       | R1 = 0.0896, wR2 = 0.2649                      |
| R indices (all data)              | R1 = 0.1432, wR2 = 0.3307                      |
| Extinction coefficient            | n/a                                            |
| Largest diff. peak and hole       | 0.717 and -0.422 e.Å <sup>-3</sup>             |

The CCDC number of product **5j** is 2195981.

## 9. Characterization of products 5

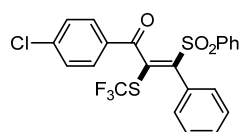

**5a**

### **(E)-1-(4-chlorophenyl)-3-phenyl-3-(phenylsulfonyl)-2-**

**((trifluoromethyl)thio)prop-2-en-1-one (5a):** white solid, 42.0 mg, 87% yield; m.p. 128.4-129.1 °C; IR (cm<sup>-1</sup>): 3060, 2927, 2854, 1683, 1587, 1487, 1444, 1402, 1323, 1248, 1153, 1105, 1084, 1010, 936, 803, 756, 692, 581, 533, 443; <sup>1</sup>H NMR (400 MHz, Chloroform-*d*) δ 8.04 (d, *J* = 8.4 Hz, 2H), 7.63 – 7.53 (m, 5H), 7.47 – 7.31 (m, 5H), 7.24 – 6.82 (m, 2H); <sup>13</sup>C NMR (100 MHz, Chloroform-*d*) δ 188.0, 146.8, 140.8, 137.7, 137.2, 134.5, 133.7, 130.9, 130.5, 130.3, 129.5, 129.3, 129.2, 128.9, 127.4 (q, *J* = 311.0

Hz);  $^{19}\text{F}$  NMR (376 MHz, Chloroform-*d*)  $\delta$  -36.6; HRMS (ESI)  $m/z$  calcd for  $\text{C}_{22}\text{H}_{14}\text{ClF}_3\text{O}_3\text{S}_2\text{Na}^+$   $[\text{M}+\text{Na}]^+$  504.9917, found 504.9912.

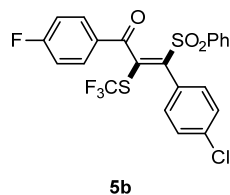

**(E)-3-(4-chlorophenyl)-1-(4-fluorophenyl)-3-(phenylsulfonyl)-2-**

**((trifluoromethyl)thio)prop-2-en-1-one (5b):** yellow solid, 47.6 mg, 95% yield; m.p. 94.3-95.1 °C; IR ( $\text{cm}^{-1}$ ): 3066, 2926, 2854, 1909, 1682, 1599, 1485, 1449, 1413, 1325, 1243, 1155, 1103, 1015, 933, 835, 758, 721, 685, 582, 520, 442;  $^1\text{H}$  NMR (400 MHz, Chloroform-*d*)  $\delta$  8.17 – 8.03 (m, 2H), 7.66 – 7.54 (m, 3H), 7.50 – 7.42 (m, 2H), 7.34 (d,  $J = 7.6$  Hz, 2H), 7.29 – 7.22 (m, 2H), 7.17 – 6.82 (m, 2H);  $^{13}\text{C}$  NMR (100 MHz, Chloroform-*d*)  $\delta$  187.4, 166.5 (d,  $J = 255.0$  Hz), 145.8, 138.4, 137.0 (d,  $J = 7.0$  Hz), 134.7, 132.3, 132.2, 131.7, 131.6 (d,  $J = 3.0$  Hz), 129.3, 129.3, 128.7, 127.3 (q,  $J = 310.0$  Hz), 116.4 (d,  $J = 22.0$  Hz);  $^{19}\text{F}$  NMR (376 MHz, Chloroform-*d*)  $\delta$  -36.6, -102.6. HRMS (ESI)  $m/z$  calcd for  $\text{C}_{22}\text{H}_{13}\text{ClF}_4\text{O}_3\text{S}_2\text{Na}^+$   $[\text{M}+\text{Na}]^+$  522.9823, found 522.9818.

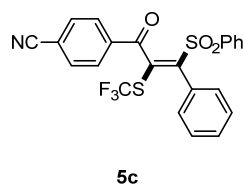

**(E)-4-(3-phenyl-3-(phenylsulfonyl)-2-((trifluoromethyl)thio)acryloyl)benzonitrile**

**(5c):** white solid, 44.9 mg, 93% yield; m.p. 175.9-176.6 °C; IR ( $\text{cm}^{-1}$ ): 3065, 2929, 2855, 2232, 1687, 1580, 1444, 1405, 1323, 1244, 1152, 1108, 1084, 1015, 938, 806, 758, 699, 578, 519, 446;  $^1\text{H}$  NMR (400 MHz, Chloroform-*d*)  $\delta$  8.20 (d,  $J = 8.0$  Hz, 2H), 7.90 (d,  $J = 8.4$  Hz, 2H), 7.65 – 7.60 (m, 1H), 7.58 – 7.51 (m, 2H), 7.50 – 7.42 (m, 3H), 7.41 – 7.32 (m, 2H), 7.24 – 6.88 (m, 2H);  $^{13}\text{C}$  NMR (100 MHz, Chloroform-*d*)  $\delta$  187.9, 147.9, 138.2, 136.8, 136.7, 134.7, 132.9, 130.6, 130.2, 130.0, 129.8, 129.30, 129.29, 129.0, 127.5 (q,  $J = 310.0$  Hz), 118.0, 117.4;  $^{19}\text{F}$  NMR (376 MHz, Chloroform-*d*)  $\delta$  -36.5; HRMS (ESI)  $m/z$  calcd for  $\text{C}_{23}\text{H}_{14}\text{F}_3\text{NO}_3\text{S}_2\text{Na}^+$   $[\text{M}+\text{Na}]^+$  496.0259, found 496.0253.

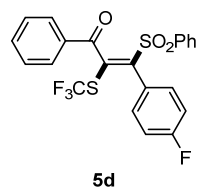

**(E)-3-(4-fluorophenyl)-1-phenyl-3-(phenylsulfonyl)-2-**

**((trifluoromethyl)thio)prop-2-en-1-one (5d)**: white solid, 43.4 mg, 93% yield; m.p. 94.9-95.7 °C; IR (cm<sup>-1</sup>): 3067, 2924, 2850, 1685, 1601, 1506, 1448, 1327, 1232, 1158, 1106, 1084, 1021, 936, 847, 794, 752, 721, 684, 584, 541, 520, 436; <sup>1</sup>H NMR (400 MHz, Chloroform-*d*) δ 8.08 (d, *J* = 7.2 Hz, 1H), 7.71 – 7.53 (m, 3H), 7.49 – 7.40 (m, 1H), 7.22 – 6.90 (m, 2H); <sup>13</sup>C NMR (100 MHz, Chloroform-*d*) δ 188.9, 163.8 (d, *J* = 250.0 Hz), 145.6, 138.9, 137.2, 135.1, 134.5, 134.4, 132.6 (d, *J* = 8.0 Hz), 129.6, 129.3, 129.2, 129.0, 127.4 (q, *J* = 311.0 Hz), 126.4 (d, *J* = 4.0 Hz); <sup>19</sup>F NMR (376 MHz, Chloroform-*d*) δ -36.6, -109.0; HRMS (ESI) *m/z* calcd for C<sub>22</sub>H<sub>14</sub>F<sub>4</sub>O<sub>3</sub>S<sub>2</sub>Na<sup>+</sup> [M+Na]<sup>+</sup> 489.0212, found 489.0205.

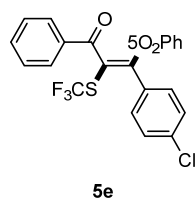

**(E)-3-(4-chlorophenyl)-1-phenyl-3-(phenylsulfonyl)-2-**

**((trifluoromethyl)thio)prop-2-en-1-one (5e)**: yellow solid, 45.9 mg, 95% yield; m.p. 97.2-98.1 °C; IR (cm<sup>-1</sup>): 3070, 2924, 2851, 1683, 1595, 1488, 1449, 1395, 1327, 1240, 1152, 1108, 1084, 1060, 1015, 938, 850, 753, 714, 684, 582, 524, 441; <sup>1</sup>H NMR (400 MHz, Chloroform-*d*) δ 8.08 (d, *J* = 7.6 Hz, 2H), 7.71 – 7.54 (m, 6H), 7.49 – 7.41 (m, 2H), 7.35 (d, *J* = 7.6 Hz, 2H), 7.23 – 6.85 (m, 2H); <sup>13</sup>C NMR (100 MHz, Chloroform-*d*) δ 188.8, 145.6, 138.8, 137.1, 136.9, 135.0, 134.6, 134.4, 131.8, 129.6, 129.3, 129.3, 129.0, 128.9, 127.4 (q, *J* = 311.0 Hz); <sup>19</sup>F NMR (376 MHz, Chloroform-*d*) δ -36.6; HRMS (ESI) *m/z* calcd for C<sub>22</sub>H<sub>14</sub>ClF<sub>3</sub>O<sub>3</sub>S<sub>2</sub>Na<sup>+</sup> [M+Na]<sup>+</sup> 504.9917, found 504.9912.

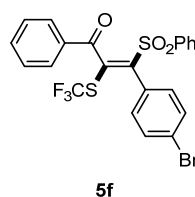

**(E)-3-(4-bromophenyl)-1-phenyl-3-(phenylsulfonyl)-2-**

**((trifluoromethyl)thio)prop-2-en-1-one (5f)**: yellow solid, 50.1 mg, 95% yield; m.p. 99.4-100.1 °C; IR (cm<sup>-1</sup>): 3391, 3066, 2926, 2852, 1682, 1597, 1482, 1447, 1392, 1327, 1238, 1157, 1103, 1083, 1013, 938, 848, 753, 688, 583, 523; <sup>1</sup>H NMR (400 MHz, Chloroform-*d*) δ 8.07 (d, *J* = 7.6 Hz, 2H), 7.71 – 7.65 (m, 1H), 7.65 – 7.56 (m, 5H), 7.54 – 7.42 (m, 4H), 7.16 – 6.72 (m, 2H); <sup>13</sup>C NMR (100 MHz, Chloroform-*d*) δ 188.8, 145.7, 138.8, 137.1, 135.0, 134.6, 134.4, 132.3, 132.0, 129.6, 129.4, 129.32, 129.30, 129.1, 127.4 (q, *J* = 311.0 Hz), 125.2; <sup>19</sup>F NMR (376 MHz, Chloroform-*d*) δ -36.6;

HRMS (ESI)  $m/z$  calcd for  $C_{22}H_{14}BrF_3O_3S_2Na^+$   $[M+Na]^+$  548.9412, found 548.9405.

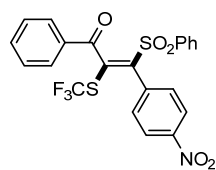

5g

**(E)-3-(4-nitrophenyl)-1-phenyl-3-(phenylsulfonyl)-2-((trifluoromethyl)thio)prop-2-en-1-one (5g):** yellow solid, 46.9 mg, 95% yield; m.p. 144.3-145.1 °C; IR ( $cm^{-1}$ ): 3438, 3071, 2921, 2854, 1685, 1597, 1525, 1447, 1351, 1240, 1153, 1104, 1081, 1018, 940, 863, 757, 694, 583, 535;  $^1H$  NMR (400 MHz, Chloroform-*d*)  $\delta$  8.16 (d,  $J = 6.4$  Hz, 2H), 8.01 (d,  $J = 7.2$  Hz, 2H), 7.69 – 7.48 (m, 7H), 7.45 – 7.39 (m, 2H), 7.19 (s, 1H);  $^{13}C$  NMR (100 MHz, Chloroform-*d*)  $\delta$  188.6, 148.9, 145.5, 139.2, 137.0, 136.8, 135.0, 134.7, 134.6, 131.8, 129.6, 129.5, 129.3, 129.1, 127.2 (q,  $J = 311.0$  Hz), 124.0;  $^{19}F$  NMR (376 MHz, Chloroform-*d*)  $\delta$  -36.5; HRMS (ESI)  $m/z$  calcd for  $C_{22}H_{14}F_3NO_5S_2Na^+$   $[M+Na]^+$  516.0157, found 516.0155.

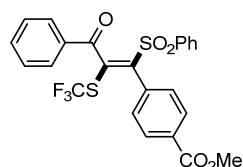

5h

**methyl (E)-4-(3-oxo-3-phenyl-1-(phenylsulfonyl)-2-((trifluoromethyl)thio)prop-1-en-1-yl)benzoate (5h):** white solid, 48.1 mg, 95% yield; m.p. 119.1-120.0 °C; IR ( $cm^{-1}$ ): 3064, 2952, 2850, 1724, 1681, 1585, 1451, 1403, 1328, 1279, 1156, 1108, 1081, 1022, 942, 867, 824, 776, 749, 700, 582, 529;  $^1H$  NMR (400 MHz, Chloroform-*d*)  $\delta$  8.01 (d,  $J = 8.0$  Hz, 2H), 7.95 (d,  $J = 6.4$  Hz, 2H), 7.64 – 7.57 (m, 1H), 7.57 – 7.45 (m, 5H), 7.40 – 7.32 (m, 2H), 7.29 – 6.79 (m, 2H), 3.86 (s, 3H);  $^{13}C$  NMR (100 MHz, Chloroform-*d*)  $\delta$  188.8, 166.2, 146.2, 138.5, 137.1, 134.98, 134.96, 134.6, 134.4, 131.8, 130.6, 130.0, 129.6, 129.32, 129.29, 129.1, 127.3 (q,  $J = 311.0$  Hz), 52.6;  $^{19}F$  NMR (376 MHz, Chloroform-*d*)  $\delta$  -36.6; HRMS (ESI)  $m/z$  calcd for  $C_{24}H_{17}F_3O_5S_2Na^+$   $[M+Na]^+$  529.0361, found 529.0365.

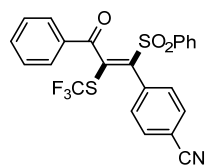

5i

**(E)-4-(3-oxo-3-phenyl-1-(phenylsulfonyl)-2-((trifluoromethyl)thio)prop-1-en-1-**



**yl)benzonitrile (5i):** white solid, 45.0 mg, 95% yield; m.p. 146.3-147.1 °C; IR (cm<sup>-1</sup>): 3069, 2922, 2857, 2233, 1680, 1582, 1501, 1447, 1403, 1327, 1240, 1154, 1105, 1083, 1023, 942, 855, 758, 725, 687, 589, 546, 524; <sup>1</sup>H NMR (400 MHz, Chloroform-*d*) δ 8.07 (d, *J* = 8.0 Hz, 1H), 7.74 – 7.55 (m, 4H), 7.51 – 7.43 (m, 1H), 7.37 – 7.04 (m, 1H); <sup>13</sup>C NMR (100 MHz, Chloroform-*d*) δ 188.6, 145.6, 139.0, 135.1, 134.9, 134.7, 134.6, 132.5, 131.3, 129.6, 129.4, 129.2, 129.1, 127.2 (q, *J* = 311.0 Hz), 117.9, 114.4; <sup>19</sup>F NMR (376 MHz, Chloroform-*d*) δ -36.5; HRMS (ESI) *m/z* calcd for C<sub>23</sub>H<sub>14</sub>F<sub>3</sub>NO<sub>3</sub>S<sub>2</sub>Na<sup>+</sup> [M+Na]<sup>+</sup> 496.0259, found 496.0252.

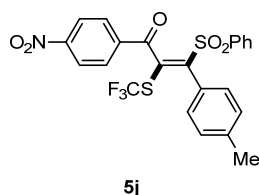

**(E)-1-(4-nitrophenyl)-3-(phenylsulfonyl)-3-(p-tolyl)-2-**

**((trifluoromethyl)thio)prop-2-en-1-one (5j):** white solid, 48.2 mg, 95% yield; m.p. 188.3-189.1 °C; IR (cm<sup>-1</sup>): 3065, 2924, 2861, 1687, 1605, 1532, 1449, 1323, 1244, 1152, 1103, 1084, 1011, 938, 831, 748, 723, 684, 592, 514, 441; <sup>1</sup>H NMR (400 MHz, Chloroform-*d*) δ 8.37 (d, *J* = 8.4 Hz, 2H), 8.19 (d, *J* = 8.4 Hz, 2H), 7.59 – 7.53 (m, 1H), 7.49 (d, *J* = 7.6 Hz, 2H), 7.44 – 7.35 (m, 2H), 7.19 (s, 1H), 7.11 (d, *J* = 4.8 Hz, 1H), 7.02 – 6.76 (m, 2H); <sup>13</sup>C NMR (100 MHz, Chloroform-*d*) δ 189.1, 146.3, 140.7, 138.3, 137.5, 135.3, 134.3, 134.2, 130.2, 129.6, 129.3, 129.1, 129.0, 127.5, 127.4 (q, *J* = 311.0 Hz), 21.6; <sup>19</sup>F NMR (376 MHz, Chloroform-*d*) δ -36.5; HRMS (ESI) *m/z* calcd for C<sub>23</sub>H<sub>16</sub>F<sub>3</sub>NO<sub>5</sub>S<sub>2</sub>Na<sup>+</sup> [M+Na]<sup>+</sup> 530.0314, found 530.0307.

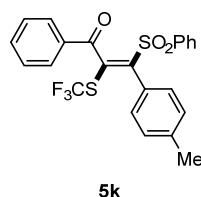

**(E)-1-phenyl-3-(phenylsulfonyl)-3-(p-tolyl)-2-((trifluoromethyl)thio)prop-2-en-1-one (5k):** white solid, 29.6 mg, 64% yield; m.p. 107.4-108.1 °C; IR (cm<sup>-1</sup>): 3065, 2923, 2854, 1682, 1582, 1503, 1450, 1328, 1239, 1154, 1107, 1080, 1022, 938, 848, 753, 721, 685, 648, 515; <sup>1</sup>H NMR (400 MHz, Chloroform-*d*) δ 8.09 (d, *J* = 7.6 Hz, 2H), 7.70 – 7.64 (m, 1H), 7.62 – 7.53 (m, 5H), 7.46 – 7.39 (m, 2H), 7.16 (d, *J* = 7.6 Hz, 2H), 7.09 – 6.84 (m, 2H), 2.38 (s, 3H); <sup>13</sup>C NMR (100 MHz, Chloroform-*d*) δ 189.1, 146.3, 140.7, 138.3, 137.5, 135.3, 134.3, 134.2, 130.2, 129.6, 129.3, 129.1, 129.0, 127.5, 127.4 (q, *J* = 311.0 Hz), 21.6; <sup>19</sup>F NMR (376 MHz, Chloroform-*d*) δ -36.7; HRMS (ESI) *m/z* calcd

for  $C_{23}H_{17}F_3O_3S_2Na^+$   $[M+Na]^+$  485.0463, found 485.0454.

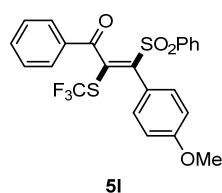

**(E)-3-(4-methoxyphenyl)-1-phenyl-3-(phenylsulfonyl)-2-**

**((trifluoromethyl)thio)prop-2-en-1-one (5l):** yellow solid, 27.3 mg, 57% yield; m.p. 143.7-144.1 °C; IR ( $cm^{-1}$ ): 3063, 2934, 2842, 1683, 1608, 1506, 1447, 1324, 1254, 1152, 1104, 1082, 1028, 943, 846, 755, 723, 685, 583, 524;  $^1H$  NMR (400 MHz, Chloroform-*d*)  $\delta$  8.09 (d,  $J = 8.4$  Hz, 2H), 7.71 – 7.64 (m, 1H), 7.62 – 7.52 (m, 5H), 7.46 – 7.39 (m, 2H), 7.12 – 6.95 (m, 2H), 6.87 (d,  $J = 8.4$  Hz, 2H), 3.83 (s, 3H);  $^{13}C$  NMR (100 MHz, Chloroform-*d*)  $\delta$  189.1, 161.1, 145.9, 138.5, 137.5, 135.3, 134.2, 132.0, 129.6, 129.3, 129.1, 129.0, 127.6 (q,  $J = 311.0$  Hz), 122.4, 114.4, 55.5;  $^{19}F$  NMR (376 MHz, Chloroform-*d*)  $\delta$  -36.7; HRMS (ESI)  $m/z$  calcd for  $C_{23}H_{17}F_3O_4S_2Na^+$   $[M+Na]^+$  501.0412, found 501.0403.

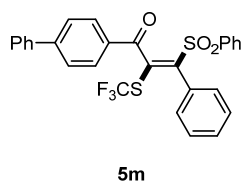

**(E)-1-([1,1'-biphenyl]-4-yl)-3-phenyl-3-(phenylsulfonyl)-2-**

**((trifluoromethyl)thio)prop-2-en-1-one (5m):** yellow solid, 33.1 mg, 63% yield; m.p. 102.1-102.8 °C; IR ( $cm^{-1}$ ): 3061, 2925, 2852, 1679, 1600, 1485, 1443, 1406, 1323, 1250, 1161, 1103, 1082, 1009, 941, 836, 810, 768, 695, 585, 522, 443;  $^1H$  NMR (400 MHz, Chloroform-*d*)  $\delta$  8.17 (d,  $J = 8.0$  Hz, 2H), 7.80 (d,  $J = 8.0$  Hz, 2H), 7.68 (d,  $J = 8.0$  Hz, 2H), 7.63 – 7.56 (m, 3H), 7.53 – 7.34 (m, 8H), 7.23 – 6.91 (m, 2H);  $^{13}C$  NMR (100 MHz, Chloroform-*d*)  $\delta$  188.6, 147.0, 146.4, 139.9, 138.3, 137.4, 134.4, 134.0, 130.5, 130.4, 130.2, 129.4, 129.1, 128.9, 128.6, 127.7, 127.6, 127.5 (q,  $J = 310.0$  Hz);  $^{19}F$  NMR (376 MHz, Chloroform-*d*)  $\delta$  -36.6; HRMS (ESI)  $m/z$  calcd for  $C_{28}H_{19}F_3O_3S_2Na^+$   $[M+Na]^+$  547.0619, found 547.0610.

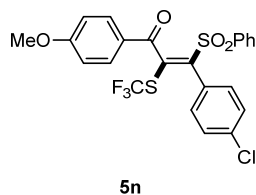

**(E)-3-(4-chlorophenyl)-1-(4-methoxyphenyl)-3-(phenylsulfonyl)-2-**

**((trifluoromethyl)thio)prop-2-en-1-one (5n):** white solid, 35.4 mg, 69% yield; m.p. 175.9-180.7 °C; IR (cm<sup>-1</sup>): 3070, 2923, 2854, 1677, 1597, 1450, 1397, 1328, 1260, 1159, 1107, 1085, 1017, 832, 758, 737, 685, 642, 573, 479; <sup>1</sup>H NMR (400 MHz, Chloroform-*d*) δ 8.05 (d, *J* = 8.8 Hz, 2H), 7.64 – 7.56 (m, 3H), 7.49 – 7.41 (m, 2H), 7.34 (d, *J* = 6.8 Hz, 2H), 7.05 (d, *J* = 8.8 Hz, 4H), 3.92 (s, 3H); <sup>13</sup>C NMR (100 MHz, Chloroform-*d*) δ 187.3, 164.6, 144.7, 139.3, 137.3, 136.8, 134.5, 132.0, 131.8, 129.28, 129.27, 129.2, 129.1, 128.3, 127.4 (q, *J* = 311.0 Hz), 55.8; <sup>19</sup>F NMR (376 MHz, Chloroform-*d*) δ -36.7; HRMS (ESI) *m/z* calcd for C<sub>23</sub>H<sub>17</sub>ClF<sub>3</sub>O<sub>4</sub>S<sub>2</sub><sup>+</sup> [M+H]<sup>+</sup> 513.0203, found 513.0200.

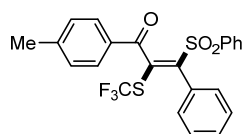

5o

**(E)-1-(4-chlorophenyl)-3-phenyl-3-(phenylsulfonyl)-2-**

**((trifluoromethyl)thio)prop-2-en-1-one (5o):** yellow solid, 35.7 mg, 77% yield; m.p. 106.3-107.1 °C; IR (cm<sup>-1</sup>): 3065, 3032, 2926, 1679, 1607, 1445, 1328, 1256, 1156, 1106, 1083, 1000, 938, 799, 760, 694, 582, 521, 476; <sup>1</sup>H NMR (400 MHz, Chloroform-*d*) δ 7.91 (d, *J* = 8.0 Hz, 2H), 7.49 – 7.41 (m, 3H), 7.37 – 7.19 (m, 7H), 7.17 – 6.75 (m, 2H), 2.35 (s, 3H); <sup>13</sup>C NMR (100 MHz, Chloroform-*d*) δ 188.5, 146.0, 145.4, 138.3, 137.3, 134.3, 132.8, 130.5, 130.2, 129.7, 129.6, 129.2, 129.0, 128.8, 127.4 (q, *J* = 310.0 Hz), 21.9; <sup>19</sup>F NMR (376 MHz, Chloroform-*d*) δ -36.7; HRMS (ESI) *m/z* calcd for C<sub>23</sub>H<sub>18</sub>F<sub>3</sub>O<sub>3</sub>S<sub>2</sub><sup>+</sup> [M+H]<sup>+</sup> 463.0644, found 463.0640.

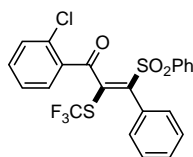

5p

**(E)-1-(2-chlorophenyl)-3-phenyl-3-(phenylsulfonyl)-2-**

**((trifluoromethyl)thio)prop-2-en-1-one (5p):** yellow oil liquid, 45.9 mg, 95% yield; IR (cm<sup>-1</sup>): 3066, 2927, 2852, 1669, 1588, 1438, 1326, 1273, 1230, 1149, 1107, 1085, 1042, 941, 839, 769, 732, 695, 646, 582, 523, 421; <sup>1</sup>H NMR (400 MHz, Chloroform-*d*) δ 8.20 (d, *J* = 7.6 Hz, 1H), 7.68 – 7.54 (m, 5H), 7.51 – 7.40 (m, 4H), 7.38 – 7.31 (m, 2H), 7.14 – 6.99 (m, 2H); <sup>13</sup>C NMR (100 MHz, Chloroform-*d*) δ 186.9, 138.9, 137.2, 134.8, 134.6, 134.4, 133.4, 132.6, 131.9, 130.7, 130.2, 130.0, 129.5, 129.1, 128.7, 127.7 (q, *J* = 311.0 Hz), 127.3; <sup>19</sup>F NMR (376 MHz, Chloroform-*d*) δ -37.0; HRMS (ESI) *m/z*

calcd for  $C_{22}H_{14}ClF_3O_3S_2Na^+$   $[M+Na]^+$  504.9917, found 504.9911.

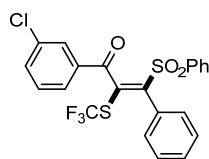

5q

**(E)-1-(3-chlorophenyl)-3-phenyl-3-(phenylsulfonyl)-2-**

**((trifluoromethyl)thio)prop-2-en-1-one (5q):** yellow solid, 45.9 mg, 95% yield; m.p. 109.3-110.1 °C; IR ( $cm^{-1}$ ): 3067, 2931, 2856, 1684, 1573, 1477, 1447, 1427, 1327, 1236, 1156, 1105, 1085, 1000, 954, 788, 758, 698, 582, 521;  $^1H$  NMR (400 MHz, Chloroform-*d*)  $\delta$  8.07 (s, 1H), 7.97 (d,  $J = 7.6$  Hz, 1H), 7.66 – 7.51 (m, 5H), 7.47 – 7.32 (m, 5H), 7.22 – 6.89 (m, 2H);  $^{13}C$  NMR (100 MHz, Chloroform-*d*)  $\delta$  187.8, 147.2, 137.4, 137.1, 136.7, 135.4, 134.5, 134.2, 130.5, 130.4, 130.3, 130.2, 129.3, 129.2, 129.1, 129.0, 128.9, 127.9, 127.4 (q,  $J = 310.0$  Hz);  $^{19}F$  NMR (376 MHz, Chloroform-*d*)  $\delta$  -36.6; HRMS (ESI)  $m/z$  calcd for  $C_{22}H_{14}ClF_3O_3S_2Na^+$   $[M+Na]^+$  504.9917, found 504.9912.

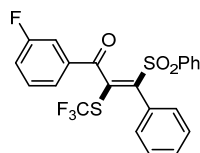

5r

**(E)-1-(3-fluorophenyl)-3-phenyl-3-(phenylsulfonyl)-2-**

**((trifluoromethyl)thio)prop-2-en-1-one (5r):** yellow solid, 44.3 mg, 95% yield; m.p. 84.6-85.1 °C; IR ( $cm^{-1}$ ): 3071, 2924, 2854, 1686, 1590, 1484, 1444, 1328, 1262, 1157, 1106, 1086, 970, 885, 829, 784, 759, 723, 699, 583, 517;  $^1H$  NMR (400 MHz, Chloroform-*d*)  $\delta$  7.88 (d,  $J = 7.6$  Hz, 1H), 7.79 (d,  $J = 8.8$  Hz, 1H), 7.64 – 7.52 (m, 4H), 7.48 – 7.32 (m, 6H), 7.22 – 6.89 (m, 2H);  $^{13}C$  NMR (100 MHz, Chloroform-*d*)  $\delta$  187.8, 163.0 (d,  $J = 247.0$  Hz), 147.1, 137.5, 137.3, 137.2, 137.1, 134.5, 130.8 (d,  $J = 7.0$  Hz), 130.5, 130.3, 129.3, 129.2, 128.9, 127.4 (q,  $J = 311.0$  Hz), 125.6 (d,  $J = 3.0$  Hz), 121.4 (d,  $J = 21.0$  Hz), 115.9 (d,  $J = 22.0$  Hz);  $^{19}F$  NMR (376 MHz, Chloroform-*d*)  $\delta$  -36.6, -111.2; HRMS (ESI)  $m/z$  calcd for  $C_{22}H_{14}F_4O_3S_2Na^+$   $[M+Na]^+$  489.0212, found 489.0204.

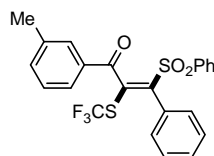

5s

**(E)-3-phenyl-3-(phenylsulfonyl)-1-(m-tolyl)-2-((trifluoromethyl)thio)prop-2-en-1-**

**one (5s):** white solid, 35.6 mg, 77% yield; m.p. 116.1-117.1 °C; IR (cm<sup>-1</sup>): 3064, 2925, 2861, 1681, 1584, 1483, 1446, 1328, 1264, 1152, 1109, 1082, 997, 954, 832, 784, 757, 725, 698, 580, 527; <sup>1</sup>H NMR (400 MHz, Chloroform-*d*) δ 7.92 (s, 1H), 7.87 (d, *J* = 6.4 Hz, 1H), 7.62 – 7.53 (m, 3H), 7.49 – 7.39 (m, 5H), 7.39 – 7.32 (m, 2H), 7.21 – 6.96 (m, 2H), 2.48 (s, 3H); <sup>13</sup>C NMR (100 MHz, Chloroform-*d*) δ 189.1, 146.2, 138.9, 138.4, 137.4, 135.23, 135.18, 134.3, 130.6, 130.4, 130.3, 129.7, 129.3; 129.1, 128.9, 127.5 (q, *J* = 310.0 Hz), 127.2, 21.6; <sup>19</sup>F NMR (376 MHz, Chloroform-*d*) δ -36.7; HRMS (ESI) *m/z* calcd for C<sub>23</sub>H<sub>17</sub>F<sub>3</sub>O<sub>3</sub>S<sub>2</sub>Na<sup>+</sup> [M+Na]<sup>+</sup> 485.0463, found 485.0455.

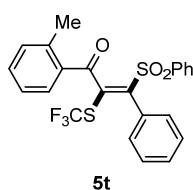

**(*E*)-3-phenyl-3-(phenylsulfonyl)-1-(*o*-tolyl)-2-((trifluoromethyl)thio)prop-2-en-1-one (5t):** colorless oil liquid, 19.9 mg, 43% yield; IR (cm<sup>-1</sup>): 3064, 2966, 2929, 1678, 1570, 1487, 1446, 1327, 1234, 1156, 1104, 1084, 1048, 934, 841, 758, 696, 583, 515; <sup>1</sup>H NMR (400 MHz, Chloroform-*d*) δ 7.93 (d, *J* = 7.6 Hz, 1H), 7.61 – 7.56 (m, 1H), 7.55 – 7.49 (m, 3H), 7.46 – 7.32 (m, 7H), 7.20 – 6.90 (m, 2H), 2.78 (s, 3H); <sup>13</sup>C NMR (100 MHz, Chloroform-*d*) δ 189.7, 145.4, 142.0, 139.7, 137.5, 134.3, 133.4, 133.3, 132.9, 132.8, 130.7, 130.5, 130.3, 129.3, 129.1, 128.8, 127.7 (q, *J* = 311.0 Hz), 126.0, 22.2; <sup>19</sup>F NMR (376 MHz, Chloroform-*d*) δ -36.8; HRMS (ESI) *m/z* calcd for C<sub>23</sub>H<sub>17</sub>F<sub>3</sub>O<sub>3</sub>S<sub>2</sub>Na<sup>+</sup> [M+Na]<sup>+</sup> 485.0463, found 485.0458.

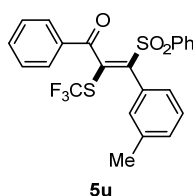

**(*E*)-1-phenyl-3-(phenylsulfonyl)-3-(*m*-tolyl)-2-((trifluoromethyl)thio)prop-2-en-1-one (5u):** yellow solid, 29.6 mg, 64% yield; m.p. 94.2-95.1 °C; IR (cm<sup>-1</sup>): 3064, 2926, 2857, 1679, 1584, 1446, 1324, 1234, 1155, 1106, 1080, 1000, 783, 746, 698, 587, 524, 438; <sup>1</sup>H NMR (400 MHz, Chloroform-*d*) δ 8.17 – 8.04 (m, 2H), 7.70 – 7.54 (m, 6H), 7.48 – 7.39 (m, 2H), 7.29 – 7.15 (m, 2H), 7.05 – 6.55 (m, 2H), 2.32 (s, 3H); <sup>13</sup>C NMR (100 MHz, Chloroform-*d*) δ 189.0, 146.3, 138.8, 138.2, 137.4, 135.3, 134.3, 134.3, 131.1, 130.8, 130.4, 129.6, 129.4, 129.0, 129.0, 128.7, 127.5 (q, *J* = 310.0 Hz), 127.4, 21.4; <sup>19</sup>F NMR (376 MHz, Chloroform-*d*) δ -36.7; HRMS (ESI) *m/z* calcd for C<sub>23</sub>H<sub>17</sub>F<sub>3</sub>O<sub>3</sub>S<sub>2</sub>Na<sup>+</sup> [M+Na]<sup>+</sup> 485.0463, found 485.0456.

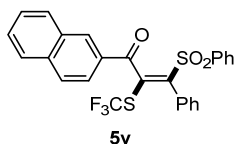

**(E)-1-(naphthalen-2-yl)-3-phenyl-3-(phenylsulfonyl)-2-**

**((trifluoromethyl)thio)prop-2-en-1-one (5v):** white solid, 46.4 mg, 93% yield; m.p. 112.3-113.1 °C; IR (cm<sup>-1</sup>): 3060, 2923, 2851, 1675, 1625, 1581, 1444, 1323, 1279, 1158, 1103, 971, 927, 867, 812, 757, 724, 702, 581, 520, 471; <sup>1</sup>H NMR (400 MHz, Chloroform-*d*) δ 8.59 (s, 1H), 8.21 – 8.13 (m, 1H), 8.08 – 7.98 (m, 2H), 7.93 (d, *J* = 8.0 Hz, 1H), 7.68 – 7.52 (m, 5H), 7.48 – 7.33 (m, 5H), 7.29 – 6.99 (m, 2H); <sup>13</sup>C NMR (100 MHz, Chloroform-*d*) δ 188.9, 146.3, 138.4, 137.3, 136.3, 134.4, 132.7, 132.6, 132.0, 130.6, 130.4, 130.1, 129.3, 129.3, 129.1, 128.9, 128.1, 127.5 (q, *J* = 310.0 Hz), 127.2, 124.5; <sup>19</sup>F NMR (376 MHz, Chloroform-*d*) δ -36.6; HRMS (ESI) *m/z* calcd for C<sub>26</sub>H<sub>17</sub>F<sub>3</sub>O<sub>3</sub>S<sub>2</sub>Na<sup>+</sup> [M+Na]<sup>+</sup> 521.0463, found 521.0457.

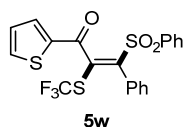

**(E)-3-phenyl-3-(phenylsulfonyl)-1-(thiophen-2-yl)-2-((trifluoromethyl)thio)prop-**

**2-en-1-one (5w):** white solid, 42.3 mg, 94% yield; m.p. 98.5-96.3 °C; IR (cm<sup>-1</sup>): 3409, 3062, 2927, 2850, 1654, 1582, 1515, 1447, 1411, 1328, 1261, 1152, 1106, 1085, 1028, 909, 863, 821, 759, 723, 697, 578, 516, 448; <sup>1</sup>H NMR (400 MHz, Chloroform-*d*) δ 7.84 – 7.68 (m, 2H), 7.54 – 7.44 (m, 3H), 7.39 – 7.21 (m, 5H), 7.19 – 7.15 (m, 1H), 7.12 – 6.56 (m, 2H); <sup>13</sup>C NMR (100 MHz, Chloroform-*d*) δ 181.1, 146.8, 142.5, 137.3, 135.8, 135.0, 134.4, 130.5, 130.3, 130.2, 129.3, 129.1, 128.8, 128.6, 127.5 (q, *J* = 310.0 Hz); <sup>19</sup>F NMR (376 MHz, Chloroform-*d*) δ -37.0; HRMS (ESI) *m/z* calcd for C<sub>20</sub>H<sub>13</sub>F<sub>3</sub>O<sub>3</sub>S<sub>3</sub>Na<sup>+</sup> [M+Na]<sup>+</sup> 476.9871, found 476.9865.

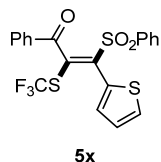

**(E)-1-phenyl-3-(phenylsulfonyl)-3-(thiophen-2-yl)-2-((trifluoromethyl)thio)prop-**

**2-en-1-one (5x):** brown solid, 40.0 mg, 88% yield; m.p. 81.9-82.8 °C; IR (cm<sup>-1</sup>): 3067, 2924, 2850, 1681, 1581, 1448, 1421, 1326, 1230, 1150, 1108, 1060, 1023, 906, 853, 789, 752, 715, 689, 588, 513, 434; <sup>1</sup>H NMR (400 MHz, Chloroform-*d*) δ 8.00 (d, *J* = 8.0 Hz, 2H), 7.62 – 7.57 (m, 1H), 7.56 – 7.47 (m, 5H), 7.46 – 7.41 (m, 1H), 7.39 – 7.32

(m, 2H), 7.00 – 6.90 (m, 2H);  $^{13}\text{C}$  NMR (100 MHz, Chloroform-*d*)  $\delta$  188.5, 141.4, 139.5, 137.3, 135.2, 134.41, 134.38, 132.7, 130.8, 129.6, 129.3, 129.2, 129.0, 127.5, 127.4 (q,  $J = 311.0$  Hz);  $^{19}\text{F}$  NMR (376 MHz, Chloroform-*d*)  $\delta$  -36.6; HRMS (ESI)  $m/z$  calcd for  $\text{C}_{20}\text{H}_{13}\text{F}_3\text{O}_3\text{S}_3\text{Na}^+$   $[\text{M}+\text{Na}]^+$  476.9871, found 476.9865.

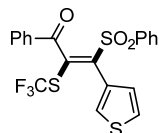

5y

**(*E*)-1-phenyl-3-(phenylsulfonyl)-3-(thiophen-3-yl)-2-((trifluoromethyl)thio)prop-2-en-1-one (5y):** brown solid, 35.9 mg, 79% yield; m.p. 107.8-108.5 °C; IR ( $\text{cm}^{-1}$ ): 3105, 3066, 2928, 2850, 1682, 1582, 1449, 1327, 1239, 1155, 1106, 1084, 1023, 978, 890, 840, 785, 757, 685, 630, 585, 563, 514;  $^1\text{H}$  NMR (400 MHz, Chloroform-*d*)  $\delta$  8.00 (d,  $J = 7.2$  Hz, 2H), 7.62 – 7.56 (m, 1H), 7.54 – 7.45 (m, 5H), 7.38 – 7.32 (m, 2H), 7.30 – 7.21 (m, 2H), 6.88 – 6.78 (m, 1H);  $^{13}\text{C}$  NMR (100 MHz, Chloroform-*d*)  $\delta$  188.9, 142.0, 138.5, 137.6, 135.1, 134.32, 134.31, 129.7, 129.6, 129.4, 129.1, 129.05, 129.01, 128.7, 127.5 (q,  $J = 310.0$  Hz), 126.7;  $^{19}\text{F}$  NMR (376 MHz, Chloroform-*d*)  $\delta$  -36.7; HRMS (ESI)  $m/z$  calcd for  $\text{C}_{20}\text{H}_{13}\text{F}_3\text{O}_3\text{S}_3\text{Na}^+$   $[\text{M}+\text{Na}]^+$  476.9871, found 476.9863.

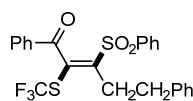

5z

**(*E*)-1,5-diphenyl-3-(phenylsulfonyl)-2-((trifluoromethyl)thio)pent-2-en-1-one (5z):** yellow solid, 33.8 mg, 71% yield; m.p. 90.6-91.5 °C; IR ( $\text{cm}^{-1}$ ): 3063, 3028, 2923, 2853, 1676, 1581, 1451, 1325, 1245, 1150, 1110, 1085, 990, 840, 735, 689, 639, 564;  $^1\text{H}$  NMR (400 MHz, Chloroform-*d*)  $\delta$  8.06 (d,  $J = 8.0$  Hz, 2H), 7.83 (d,  $J = 8.0$  Hz, 2H), 7.72 – 7.58 (m, 4H), 7.54 – 7.47 (m, 2H), 7.39 – 7.33 (m, 2H), 7.31 – 7.24 (m, 3H), 3.14 – 2.65 (m, 4H);  $^{13}\text{C}$  NMR (100 MHz, Chloroform-*d*)  $\delta$  189.8, 149.3, 139.5, 137.9, 137.0, 134.7, 134.6, 134.0, 129.7, 129.7, 129.2, 129.1, 128.93, 128.86, 127.6 (q,  $J = 311.0$  Hz), 127.0, 34.9, 33.4;  $^{19}\text{F}$  NMR (376 MHz, Chloroform-*d*)  $\delta$  -37.3; HRMS (ESI)  $m/z$  calcd for  $\text{C}_{24}\text{H}_{19}\text{F}_3\text{O}_3\text{S}_2\text{Na}^+$   $[\text{M}+\text{Na}]^+$  499.0619, found 499.0613.

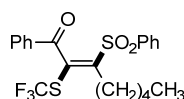

5aa

**(*E*)-1-phenyl-3-(phenylsulfonyl)-2-((trifluoromethyl)thio)oct-2-en-1-one (5aa):** white solid, 28.8 mg, 65% yield; m.p. 78.3-79.0 °C; IR ( $\text{cm}^{-1}$ ): 3065, 2956, 2930, 2864,

1679, 1581, 1450, 1325, 1238, 1157, 1102, 1080, 857, 743, 689, 640, 569;  $^1\text{H}$  NMR (400 MHz, Chloroform-*d*)  $\delta$  8.00 (d,  $J = 8.0$  Hz, 2H), 7.94 (d,  $J = 8.0$  Hz, 2H), 7.71 – 7.57 (m, 4H), 7.56 – 7.49 (m, 2H), 2.55 (s, 2H), 1.84 – 1.25 (m, 7H), 0.89 (t,  $J = 6.6$  Hz, 3H);  $^{13}\text{C}$  NMR (100 MHz, Chloroform-*d*)  $\delta$  189.9, 151.0, 138.1, 135.1, 134.9, 134.5, 134.0, 129.6, 129.0, 128.9, 127.6 (q,  $J = 310.0$  Hz), 32.0, 31.4, 29.3, 22.2, 14.0;  $^{19}\text{F}$  NMR (376 MHz, Chloroform-*d*)  $\delta$  -37.2; HRMS (ESI)  $m/z$  calcd for  $\text{C}_{21}\text{H}_{21}\text{F}_3\text{O}_3\text{S}_2\text{Na}^+$   $[\text{M}+\text{Na}]^+$  465.0776, found 465.0768.

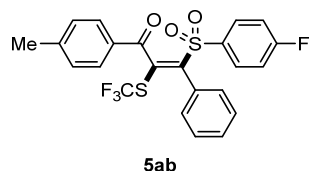

**(E)-3-((4-fluorophenyl)sulfonyl)-3-phenyl-1-(p-tolyl)-2-**

**((trifluoromethyl)thio)prop-2-en-1-one (5ab):** white solid, 31.7 mg, 66% yield; m.p. 107.1-108.1 °C; IR ( $\text{cm}^{-1}$ ): 3066, 2926, 2859, 1679, 1592, 1491, 1405, 1328, 1241, 1150, 1106, 1082, 937, 837, 798, 759, 697, 577, 505;  $^1\text{H}$  NMR (400 MHz, Chloroform-*d*)  $\delta$  7.98 (d,  $J = 8.0$  Hz, 2H), 7.61 – 7.54 (m, 2H), 7.48 – 7.34 (m, 5H), 7.24 – 6.82 (m, 4H), 2.48 (s, 3H);  $^{13}\text{C}$  NMR (100 MHz, Chloroform-*d*)  $\delta$  188.7, 166.2 (d,  $J = 256.0$  Hz), 145.7, 145.6, 138.9, 133.5 (d,  $J = 3.0$  Hz), 132.8, 132.3 (d,  $J = 10.0$  Hz), 130.5, 130.4, 129.8, 129.7, 129.0, 127.5 (q,  $J = 311.0$  Hz), 116.5 (d,  $J = 23.0$  Hz), 22.1;  $^{19}\text{F}$  NMR (376 MHz, Chloroform-*d*)  $\delta$  -36.7, -102.1; HRMS (ESI)  $m/z$  calcd for  $\text{C}_{23}\text{H}_{16}\text{F}_4\text{O}_3\text{S}_2\text{Na}^+$   $[\text{M}+\text{Na}]^+$  503.0369, found 503.0363.

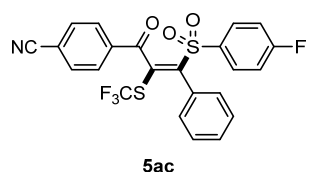

**(E)-4-(3-((4-fluorophenyl)sulfonyl)-3-phenyl-2-**

**((trifluoromethyl)thio)acryloyl)benzotrile (5ac):** white solid, 46.7 mg, 95% yield; m.p. 149.4-150.0 °C; IR ( $\text{cm}^{-1}$ ): 3102, 3073, 2922, 2854, 2233, 1688, 1591, 1494, 1407, 1324, 1295, 1242, 1149, 1106, 1081, 1057, 1018, 941, 839, 804, 761, 697, 576, 508, 445;  $^1\text{H}$  NMR (400 MHz, Chloroform-*d*)  $\delta$  8.19 (d,  $J = 8.4$  Hz, 2H), 7.90 (d,  $J = 8.4$  Hz, 2H), 7.62 – 7.53 (m, 2H), 7.52 – 7.35 (m, 3H), 7.26 – 6.91 (m, 4H);  $^{13}\text{C}$  NMR (100 MHz, Chloroform-*d*)  $\delta$  187.9, 167.4 (d,  $J = 257.0$  Hz), 147.6, 138.1, 137.0, 132.9, 132.9, 132.3 (d,  $J = 10.0$  Hz), 130.8, 130.2, 129.84, 129.80, 129.1, 127.3 (q,  $J = 311.0$  Hz), 117.9, 117.4, 116.7 (d,  $J = 23.0$  Hz);  $^{19}\text{F}$  NMR (376 MHz, Chloroform-*d*)  $\delta$  -36.5, -101.1; HRMS (ESI)  $m/z$  calcd for  $\text{C}_{23}\text{H}_{13}\text{F}_4\text{NO}_3\text{S}_2\text{Na}^+$   $[\text{M}+\text{Na}]^+$  514.0165, found



514.0167.

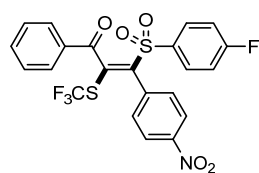

5ad

**(E)-3-((4-fluorophenyl)sulfonyl)-3-(4-nitrophenyl)-1-phenyl-2-**

**((trifluoromethyl)thio)prop-2-en-1-one (5ad):** white solid, 48.6 mg, 95% yield; m.p. 175.2-176.0 °C; IR (cm<sup>-1</sup>): 3070, 2962, 2868, 1682, 1593, 1528, 1490, 1453, 1349, 1241, 1152, 1106, 1082, 1058, 1016, 942, 838, 763, 693, 576, 505; <sup>1</sup>H NMR (400 MHz, Chloroform-*d*) δ 8.26 (d, *J* = 6.4 Hz, 2H), 8.06 (d, *J* = 8.0 Hz, 2H), 7.78 – 7.51 (m, 6H), 7.26 – 7.06 (m, 3H); <sup>13</sup>C NMR (100 MHz, Chloroform-*d*) δ 188.7, 166.5 (d, *J* = 258.0 Hz), 149.0, 145.2, 139.7, 136.8, 134.7, 134.6, 132.9 (d, *J* = 3.0 Hz), 132.3 (d, *J* = 10.0 Hz), 131.8, 129.6, 129.2, 127.1 (q, *J* = 311.0 Hz), 124.1, 117.0 (d, *J* = 23.0 Hz); <sup>19</sup>F NMR (376 MHz, Chloroform-*d*) δ -36.4, -100.5; HRMS (ESI) *m/z* calcd for C<sub>22</sub>H<sub>13</sub>F<sub>4</sub>NO<sub>5</sub>S<sub>2</sub>Na<sup>+</sup> [M+Na]<sup>+</sup> 534.0063, found 534.0065.

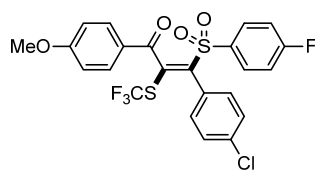

5ae

**(E)-3-(4-chlorophenyl)-3-((4-fluorophenyl)sulfonyl)-1-(4-methoxyphenyl)-2-**

**((trifluoromethyl)thio)prop-2-en-1-one (5ae):** white solid, 42.5 mg, 80% yield; m.p. 178.2-179.0 °C; IR (cm<sup>-1</sup>): 3074, 2936, 2847, 1669, 1597, 1492, 1420, 1332, 1254, 1154, 1104, 1083, 1060, 1016, 933, 833, 756, 718, 684, 579, 513, 435; <sup>1</sup>H NMR (400 MHz, Chloroform-*d*) δ 8.03 (d, *J* = 8.4 Hz, 2H), 7.62 (dd, *J* = 8.4, 4.8 Hz, 2H), 7.37 (d, *J* = 6.4 Hz, 2H), 7.24 – 6.68 (m, 6H), 3.92 (s, 3H); <sup>13</sup>C NMR (100 MHz, Chloroform-*d*) δ 187.4, 166.3 (d, *J* = 257.0 Hz), 164.7, 144.4, 139.7, 136.9, 133.4 (d, *J* = 3.0 Hz), 132.3 (d, *J* = 9.0 Hz), 132.0, 131.8, 129.4, 128.9, 128.2, 127.4 (q, *J* = 310.0 Hz), 116.7 (d, *J* = 22.0 Hz), 114.4, 55.8; <sup>19</sup>F NMR (376 MHz, Chloroform-*d*) δ -36.6, -101.6; HRMS (ESI) *m/z* calcd for C<sub>23</sub>H<sub>15</sub>ClF<sub>4</sub>O<sub>4</sub>S<sub>2</sub>Na<sup>+</sup> [M+Na]<sup>+</sup> 552.9928, found 552.9923.

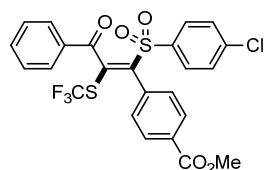

5af

**methyl**

**(E)-4-(1-((4-chlorophenyl)sulfonyl)-3-oxo-3-phenyl-2-**

**((trifluoromethyl)thio)prop-1-en-1-yl)benzoate (5af):** white solid, 45.4 mg, 84% yield; m.p. 60.3-61.1 °C; IR (cm<sup>-1</sup>): 3092, 3069, 2955, 2846, 1727, 1682, 1585, 1476, 1447, 1396, 1333, 1276, 1162, 1105, 1082, 1059, 1020, 940, 865, 831, 774, 705, 574, 471; <sup>1</sup>H NMR (400 MHz, Chloroform-*d*) δ 8.07 (d, *J* = 7.2 Hz, 4H), 7.72 – 7.65 (m, 1H), 7.63 – 7.55 (m, 2H), 7.50 (d, *J* = 8.4 Hz, 2H), 7.42 (d, *J* = 8.8 Hz, 2H), 7.36 – 6.82 (m, 2H), 3.95 (s, 3H); <sup>13</sup>C NMR (100 MHz, Chloroform-*d*) δ 188.8, 166.2, 145.5, 141.6, 139.3, 135.6, 134.9, 134.7, 134.5, 132.0, 130.7, 130.1, 129.7, 129.6, 129.1, 127.3 (q, *J* = 311.0 Hz), 52.6; <sup>19</sup>F NMR (376 MHz, Chloroform-*d*) δ -36.5; HRMS (ESI) *m/z* calcd for C<sub>24</sub>H<sub>16</sub>ClF<sub>3</sub>O<sub>5</sub>S<sub>2</sub>Na<sup>+</sup> [M+Na]<sup>+</sup> 562.9972, found 562.9967.

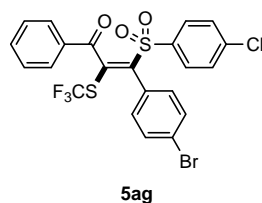

**(E)-3-(4-bromophenyl)-3-((4-chlorophenyl)sulfonyl)-1-phenyl-2-**

**((trifluoromethyl)thio)prop-2-en-1-one (5ag):** yellow solid, 53,4 mg, 95% yield; m.p. 132,7-133,4 °C; IR (cm<sup>-1</sup>): 3086, 2927, 2856, 1681, 1583, 1479, 1452, 1392, 1332, 1244, 1162, 1102, 1080, 1058, 1014, 938, 829, 763, 714, 687, 577, 473; <sup>1</sup>H NMR (400 MHz, Chloroform-*d*) δ 8.05 (d, *J* = 7.2 Hz, 2H), 7.71 – 7.65 (m, 1H), 7.61 – 7.48 (m, 6H), 7.44 (d, *J* = 8.8 Hz, 2H), 7.20 – 6.84 (m, 2H); <sup>13</sup>C NMR (100 MHz, Chloroform-*d*) δ 188.8, 145.0, 141.6, 139.6, 135.7, 134.9, 134.5, 132.4, 130.7, 129.7, 129.6, 129.13, 129.09, 127.3 (q, *J* = 311.0 Hz), 125.4; <sup>19</sup>F NMR (376 MHz, Chloroform-*d*) δ -36.5; HRMS (ESI) *m/z* calcd for C<sub>22</sub>H<sub>13</sub>BrClF<sub>3</sub>O<sub>3</sub>S<sub>2</sub>Na<sup>+</sup> [M+Na]<sup>+</sup> 582.9022, found 582.9017.

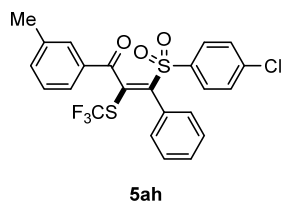

**(E)-3-((4-chlorophenyl)sulfonyl)-3-phenyl-1-(m-tolyl)-2-**

**((trifluoromethyl)thio)prop-2-en-1-one (5ah):** white solid, 30.3 mg, 61% yield; m.p. 94.7-95.3 °C; IR (cm<sup>-1</sup>): 3030, 2923, 2856, 1689, 1607, 1530, 1473, 1391, 1329, 1242, 1155, 1103, 1083, 1057, 1011, 939, 826, 759, 713, 605, 574, 502, 471, 451; <sup>1</sup>H NMR (400 MHz, Chloroform-*d*) δ 7.90 (s, 1H), 7.85 (d, *J* = 6.8 Hz, 1H), 7.50 – 7.44 (m, 5H), 7.40 (d, *J* = 8.8 Hz, 4H), 7.24 – 6.90 (m, 2H), 2.48 (s, 3H); <sup>13</sup>C NMR (100 MHz, Chloroform-*d*) δ 189.1, 145.6, 141.3, 139.2, 139.0, 136.0, 135.3, 135.1, 130.8, 130.5, 130.5, 130.3, 129.7, 129.5, 129.0, 128.9, 127.4 (q, *J* = 311.0 Hz), 127.2, 21.6; <sup>19</sup>F NMR

(376 MHz, Chloroform-*d*)  $\delta$  -36.6; HRMS (ESI)  $m/z$  calcd for  $C_{23}H_{16}ClF_3O_3S_2Na^+$   $[M+Na]^+$  519.0073, found 519.0068.

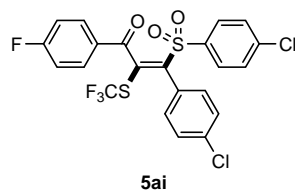

**(*E*)-3-(4-chlorophenyl)-3-((4-chlorophenyl)sulfonyl)-1-(4-fluorophenyl)-2-((trifluoromethyl)thio)prop-2-en-1-one (5ai):** white solid, 41.8 mg, 78% yield; m.p. 151.5-152.2 °C; IR ( $cm^{-1}$ ): 3091, 2926, 2858, 1681, 1596, 1488, 1396, 1334, 1243, 1158, 1106, 1084, 1055, 1016, 931, 834, 754, 714, 572, 475;  $^1H$  NMR (400 MHz, Chloroform-*d*)  $\delta$  8.15 – 8.02 (m, 2H), 7.55 – 7.36 (m, 6H), 7.30 – 7.23 (m, 2H), 7.20 – 6.81 (m, 2H);  $^{13}C$  NMR (100 MHz, Chloroform-*d*)  $\delta$  187.5, 166.5 (d,  $J = 256.0$  Hz), 145.1, 141.7, 139.3, 137.2, 135.6, 132.3 (d,  $J = 10.0$  Hz), 131.8, 131.5, 130.7, 129.7, 129.5, 128.5, 127.3 (q,  $J = 311.0$  Hz), 116.5 (d,  $J = 22.0$  Hz);  $^{19}F$  NMR (376 MHz, Chloroform-*d*)  $\delta$  -36.5, -102.3; HRMS (ESI)  $m/z$  calcd for  $C_{22}H_{12}Cl_2F_4O_3S_2Na^+$   $[M+Na]^+$  556.9433, found 556.9429.

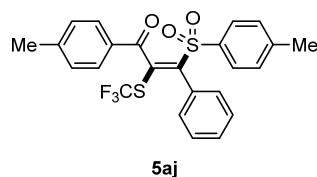

**(*E*)-3-phenyl-1-(p-tolyl)-3-tosyl-2-((trifluoromethyl)thio)prop-2-en-1-one (5aj):** white solid, 34.8 mg, 73% yield; m.p. 117.5-118.1 °C; IR ( $cm^{-1}$ ): 3062, 2920, 2852, 1680, 1584, 1485, 1442, 1399, 1326, 1244, 1153, 1108, 1082, 1060, 853, 749, 702, 681, 638, 595, 507;  $^1H$  NMR (400 MHz, Chloroform-*d*)  $\delta$  7.99 (d,  $J = 8.0$  Hz, 2H), 7.48 – 7.31 (m, 7H), 7.24 – 6.86 (m, 4H), 2.47 (s, 3H), 2.40 (s, 3H);  $^{13}C$  NMR (100 MHz, Chloroform-*d*)  $\delta$  188.7, 146.5, 145.5, 145.4, 137.9, 134.5, 132.9, 130.8, 130.4, 130.2, 129.7, 129.4, 128.8, 127.5 (q,  $J = 310.0$  Hz), 22.0, 21.9;  $^{19}F$  NMR (376 MHz, Chloroform-*d*)  $\delta$  -36.8; HRMS (ESI)  $m/z$  calcd for  $C_{24}H_{19}F_3O_3S_2Na^+$   $[M+Na]^+$  499.0619, found 499.0608.

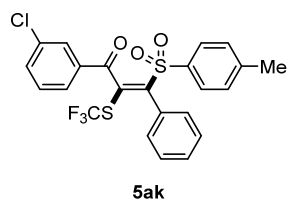

**(*E*)-1-(3-chlorophenyl)-3-phenyl-3-tosyl-2-((trifluoromethyl)thio)prop-2-en-1-one**

**(5ak):** white solid, 47.2 mg, 95% yield; m.p. 103.6-104.2 °C; IR (cm<sup>-1</sup>): 3195, 3067, 2918, 2855, 1676, 1591, 1485, 1453, 1421, 1331, 1241, 1156, 1103, 1082, 1012, 853, 757, 742, 689, 598, 577, 508; <sup>1</sup>H NMR (400 MHz, Chloroform-*d*) δ 8.06 (s, 1H), 7.96 (d, *J* = 7.6 Hz, 1H), 7.67 – 7.60 (m, 1H), 7.56 – 7.50 (m, 1H), 7.48 – 7.34 (m, 5H), 7.22 (d, *J* = 8.0 Hz, 2H), 7.18 – 6.92 (m, 2H), 2.41 (s, 3H); <sup>13</sup>C NMR (100 MHz, Chloroform-*d*) δ 187.9, 147.8, 145.8, 136.8, 136.7, 135.4, 134.1, 134.1, 130.4, 130.3, 129.9, 129.4, 129.2, 128.9, 127.9, 127.5 (q, *J* = 311.0 Hz), 21.9; <sup>19</sup>F NMR (376 MHz, Chloroform-*d*) δ -36.7; HRMS (ESI) *m/z* calcd for C<sub>23</sub>H<sub>16</sub>ClF<sub>3</sub>O<sub>3</sub>S<sub>2</sub>Na<sup>+</sup> [M+Na]<sup>+</sup> 519.0073, found 519.0066.

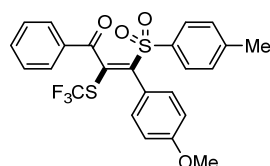

5al

**(*E*)-3-(4-methoxyphenyl)-1-phenyl-3-tosyl-2-((trifluoromethyl)thio)prop-2-en-1-one (5al):** yellow solid, 31.0 mg, 63% yield; m.p. 59.2-60.1 °C; IR (cm<sup>-1</sup>): 3074, 2958, 2842, 1678, 1602, 1506, 1450, 1324, 1293, 1253, 1152, 1106, 1086, 1025, 939, 843, 752, 722, 686, 641, 585, 514; <sup>1</sup>H NMR (400 MHz, Chloroform-*d*) δ 8.08 (d, *J* = 7.2 Hz, 2H), 7.69 – 7.63 (m, 1H), 7.61 – 7.53 (m, 2H), 7.42 (d, *J* = 8.0 Hz, 2H), 7.21 (d, *J* = 8.0 Hz, 2H), 7.13 – 6.96 (m, 2H), 6.87 (d, *J* = 8.4 Hz, 2H), 3.84 (s, 3H), 2.41 (s, 3H); <sup>13</sup>C NMR (100 MHz, Chloroform-*d*) δ 189.2, 161.1, 146.4, 145.5, 137.8, 135.3, 134.6, 134.2, 132.0, 129.8, 129.6, 129.4, 129.0, 127.6 (q, *J* = 310.0 Hz), 122.5, 55.5, 21.9; <sup>19</sup>F NMR (376 MHz, Chloroform-*d*) δ -36.8; HRMS (ESI) *m/z* calcd for C<sub>24</sub>H<sub>19</sub>F<sub>3</sub>O<sub>4</sub>S<sub>2</sub>Na<sup>+</sup> [M+Na]<sup>+</sup> 515.0569, found 515.0569.

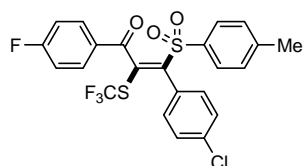

5am

**(*E*)-3-(4-chlorophenyl)-1-(4-fluorophenyl)-3-tosyl-2-((trifluoromethyl)thio)prop-2-en-1-one (5am):** white solid, 48.9 mg, 95% yield; m.p. 130.5-131.3 °C; IR (cm<sup>-1</sup>): 3455, 3065, 2924, 2854, 1681, 1595, 1484, 1413, 1327, 1241, 1150, 1105, 1085, 1060, 1014, 933, 837, 741, 711, 680, 640, 605, 579, 514; <sup>1</sup>H NMR (400 MHz, Chloroform-*d*) δ 8.20 – 8.03 (m, 2H), 7.48 – 7.42 (m, 2H), 7.35 (d, *J* = 7.2 Hz, 2H), 7.30 – 7.20 (m, 4H), 7.17 – 6.74 (m, 2H), 2.42 (s, 3H); <sup>13</sup>C NMR (100 MHz, Chloroform-*d*) δ 187.5, 166.4 (d, *J* = 255.0 Hz), 146.3, 146.0, 137.8, 136.8, 134.0, 132.3 (d, *J* = 10.0 Hz), 131.8,

131.6 (d,  $J = 3.0$  Hz), 130.0, 129.3, 129.3, 128.9, 127.4 (q,  $J = 311.0$  Hz), 116.4 (d,  $J = 22.0$  Hz), 21.9;  $^{19}\text{F}$  NMR (376 MHz, Chloroform-*d*)  $\delta$  -36.7, -102.7; HRMS (ESI)  $m/z$  calcd for  $\text{C}_{23}\text{H}_{15}\text{ClF}_4\text{O}_3\text{S}_2\text{Na}^+$   $[\text{M}+\text{Na}]^+$  536.9979, found 536.9972.

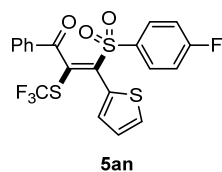

**(*E*)-3-((4-fluorophenyl)sulfonyl)-1-phenyl-3-(thiophen-2-yl)-2-**

**((trifluoromethyl)thio)prop-2-en-1-one (5an):** white solid, 40.2 mg, 85% yield; m.p. 104.1-105.0 °C; IR ( $\text{cm}^{-1}$ ): 3108, 2931, 2859, 1680, 1589, 1492, 1447, 1406, 1330, 1238, 1152, 1106, 1086, 1060, 979, 837, 786, 735, 690, 649, 573, 496;  $^1\text{H}$  NMR (400 MHz, Chloroform-*d*)  $\delta$  8.06 (d,  $J = 8.0$  Hz, 2H), 7.71 – 7.64 (m, 1H), 7.63 – 7.51 (m, 4H), 7.43 – 7.31 (m, 2H), 7.15 – 7.05 (m, 2H), 6.92 (d,  $J = 4.8$  Hz, 1H);  $^{13}\text{C}$  NMR (100 MHz, Chloroform-*d*)  $\delta$  189.0, 166.2 (d,  $J = 257.0$  Hz), 141.8, 138.8, 135.1, 134.4, 133.6 (d,  $J = 2.0$  Hz), 132.0 (d,  $J = 9.0$  Hz), 129.6, 129.6, 129.5, 129.0, 128.7, 127.5 (q,  $J = 311.0$  Hz), 126.9, 116.6 (d,  $J = 22.0$  Hz);  $^{19}\text{F}$  NMR (376 MHz, Chloroform-*d*)  $\delta$  -36.7, -101.9; HRMS (ESI)  $m/z$  calcd for  $\text{C}_{20}\text{H}_{12}\text{F}_4\text{O}_3\text{S}_3\text{Na}^+$   $[\text{M}+\text{Na}]^+$  494.9776, found 494.9773.

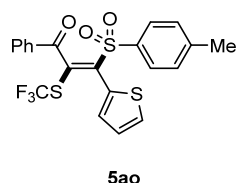

**(*E*)-1-phenyl-3-(thiophen-2-yl)-3-tosyl-2-((trifluoromethyl)thio)prop-2-en-1-one**

**(5ao):** brown oil liquid, 44.0 mg, 94% yield; IR ( $\text{cm}^{-1}$ ): 3105, 3060, 2925, 1681, 1597, 1450, 1326, 1231, 1152, 1107, 1084, 1056, 904, 848, 814, 747, 690, 583, 504;  $^1\text{H}$  NMR (400 MHz, Chloroform-*d*)  $\delta$  8.06 (d,  $J = 8.4$  Hz, 2H), 7.69 – 7.64 (m, 1H), 7.60 – 7.54 (m, 2H), 7.53 – 7.44 (m, 3H), 7.22 (d,  $J = 8.0$  Hz, 2H), 7.08 – 6.99 (m, 2H), 2.40 (s, 3H);  $^{13}\text{C}$  NMR (100 MHz, Chloroform-*d*)  $\delta$  188.6, 145.7, 140.7, 140.0, 135.2, 134.30, 134.28, 132.6, 130.7, 129.8, 129.6, 129.5, 129.2, 129.0, 127.5, 127.4 (q,  $J = 311.0$  Hz), 21.9;  $^{19}\text{F}$  NMR (376 MHz, Chloroform-*d*)  $\delta$  -36.6; HRMS (ESI)  $m/z$  calcd for  $\text{C}_{21}\text{H}_{15}\text{F}_3\text{O}_3\text{S}_3\text{Na}^+$   $[\text{M}+\text{Na}]^+$  491.0027, found 491.0020.

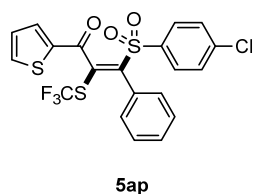

**(E)-3-((4-chlorophenyl)sulfonyl)-3-phenyl-1-(thiophen-2-yl)-2-**

**((trifluoromethyl)thio)prop-2-en-1-one (5ap):** white solid, 40.6 mg, 83% yield; m.p. 121.0-121.9 °C; IR (cm<sup>-1</sup>): 3393, 3066, 2922, 2858, 1679, 1583, 1476, 1444, 1396, 1331, 1262, 1155, 1101, 1085, 1016, 957, 828, 786, 759, 700, 609, 577, 470; <sup>1</sup>H NMR (400 MHz, Chloroform-*d*) δ 7.92 – 7.77 (m, 2H), 7.54 – 7.33 (m, 7H), 7.27 – 7.23 (m, 1H), 7.21 – 6.76 (m, 2H); <sup>13</sup>C NMR (100 MHz, Chloroform-*d*) δ 181.0, 146.2, 142.4, 141.3, 138.1, 136.0, 135.9, 135.1, 130.8, 130.5, 130.3, 129.5, 129.0, 128.6, 127.5 (q, *J* = 307.0 Hz); <sup>19</sup>F NMR (376 MHz, Chloroform-*d*) δ -36.9; HRMS (ESI) *m/z* calcd for C<sub>20</sub>H<sub>12</sub>ClF<sub>3</sub>O<sub>3</sub>S<sub>3</sub>Na<sup>+</sup> [M+Na]<sup>+</sup> 510.9481, found 510.9475.

**10. General procedure for synthesis of products 7a**

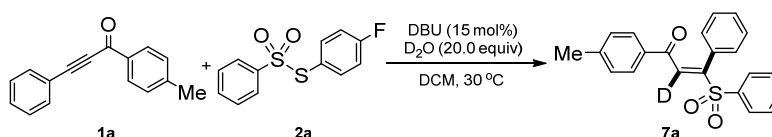

To an oven-dried 10 mL Schlenk tube equipped with a stir bar was added ynone **1a** (0.2 mmol), thiosulfonate **2a** (0.3 mmol), 2.0 mL of DCM, D<sub>2</sub>O (20.0 equiv) and DBU (15 mol%). Then the reaction mixture was stirred at room temperature until the substrate was consumed completely which was monitored by TLC. The solvent was evaporated, then the crude product was purified by column chromatography on silica gel (200~300 mesh) using ethyl acetate in petroleum ether (v/v = 40:1~10:1) as the eluent to afford the corresponding product **7a** in 92% yield.

**11. Characterization of products 7a**

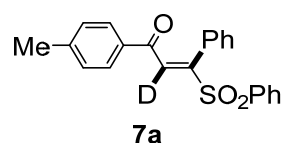

**(E)-3-phenyl-3-(phenylsulfonyl)-1-(p-tolyl)prop-2-en-1-one-2-d (7a):** yellow solid, 66.9 mg, 92% yield; m.p. 93.2-93.8 °C; IR (cm<sup>-1</sup>): 3063, 2921, 2251, 1669, 1602, 1490, 1444, 1406, 1315, 1278, 1228, 1177, 1153, 1086, 1065, 1028, 966, 895, 828, 762, 732, 695, 645, 604, 570, 520, 474; <sup>1</sup>H NMR (400 MHz, Chloroform-*d*) δ 7.75 (d, *J* = 8.4 Hz, 2H), 7.64 (d, *J* = 7.2 Hz, 2H), 7.59 – 7.52 (m, 1H), 7.45 – 7.39 (m, 2H), 7.25 – 7.17 (m, 3H), 7.17 – 7.11 (m, 2H), 7.11 – 7.04 (m, 2H), 2.37 (s, 3H); <sup>13</sup>C NMR (100 MHz, Chloroform-*d*) δ 190.7, 150.2, 145.4, 137.3, 133.9, 133.5, 130.3, 129.6, 129.6, 129.5,

129.3, 129.1, 128.9, 128.1, 21.9; HRMS (ESI)  $m/z$  calcd for  $C_{22}H_{18}DO_3S^+$   $[M+H]^+$  364.1111, found, 364.1114.

## 12. Copies of NMR spectra of products

3a

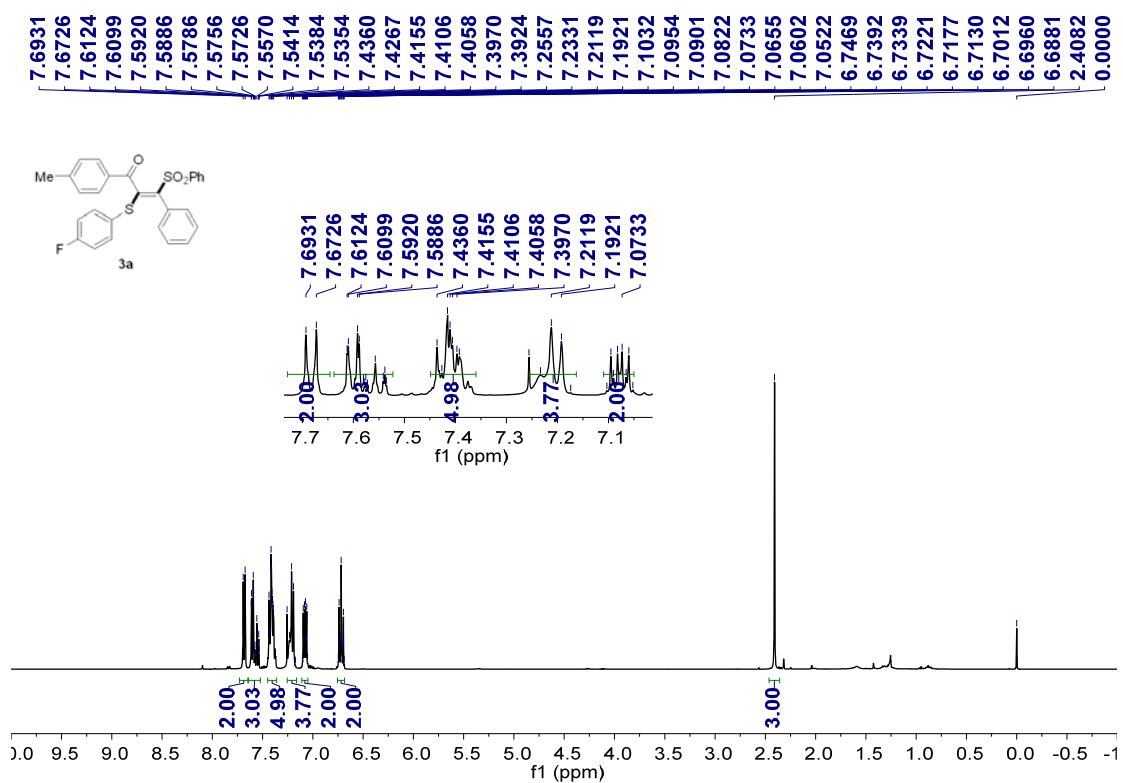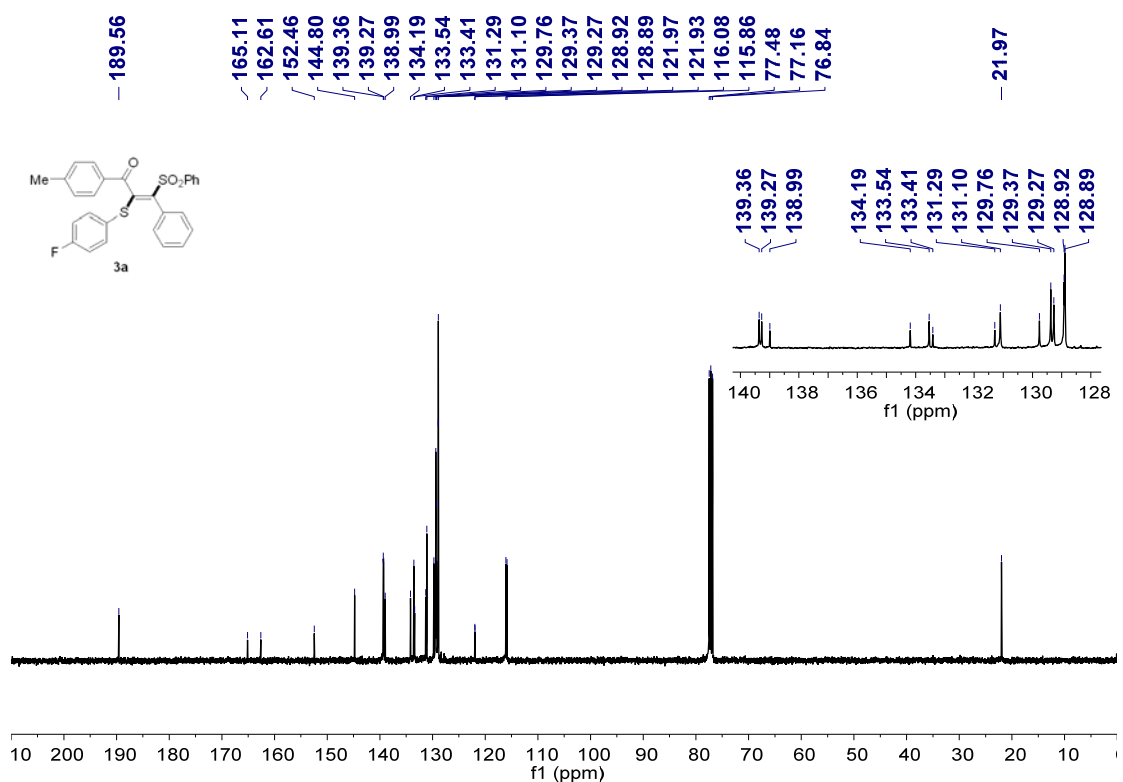

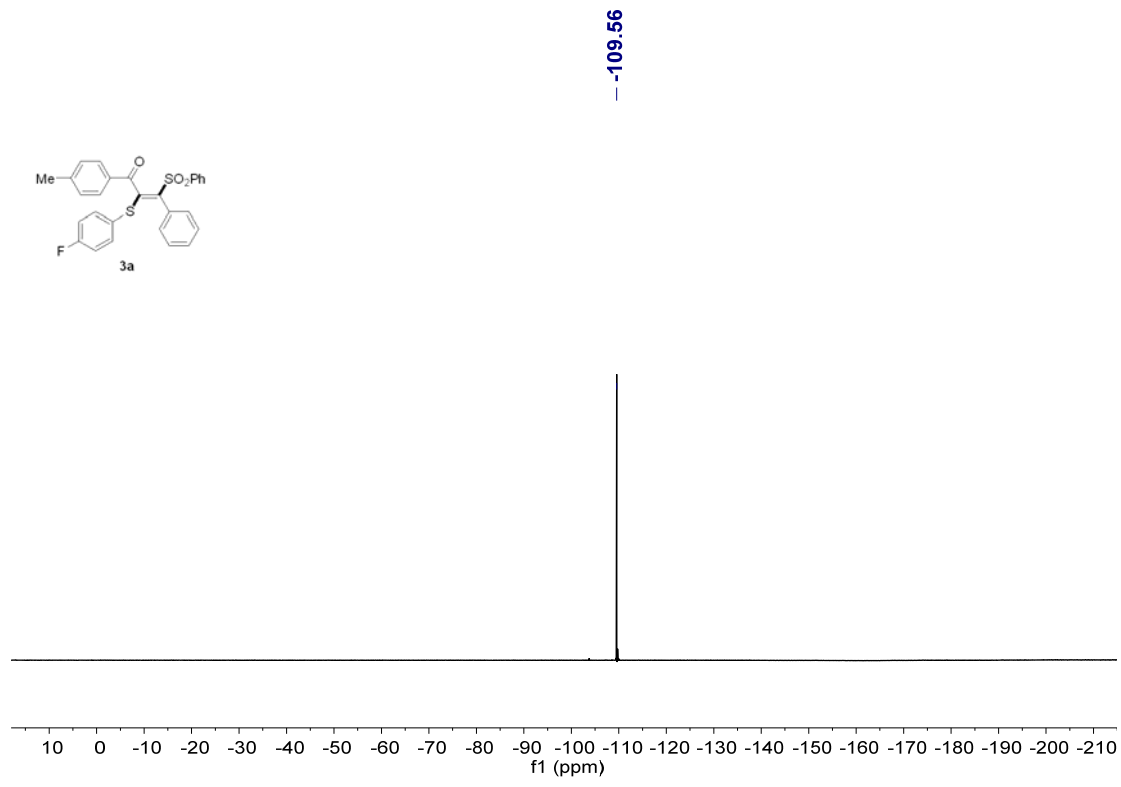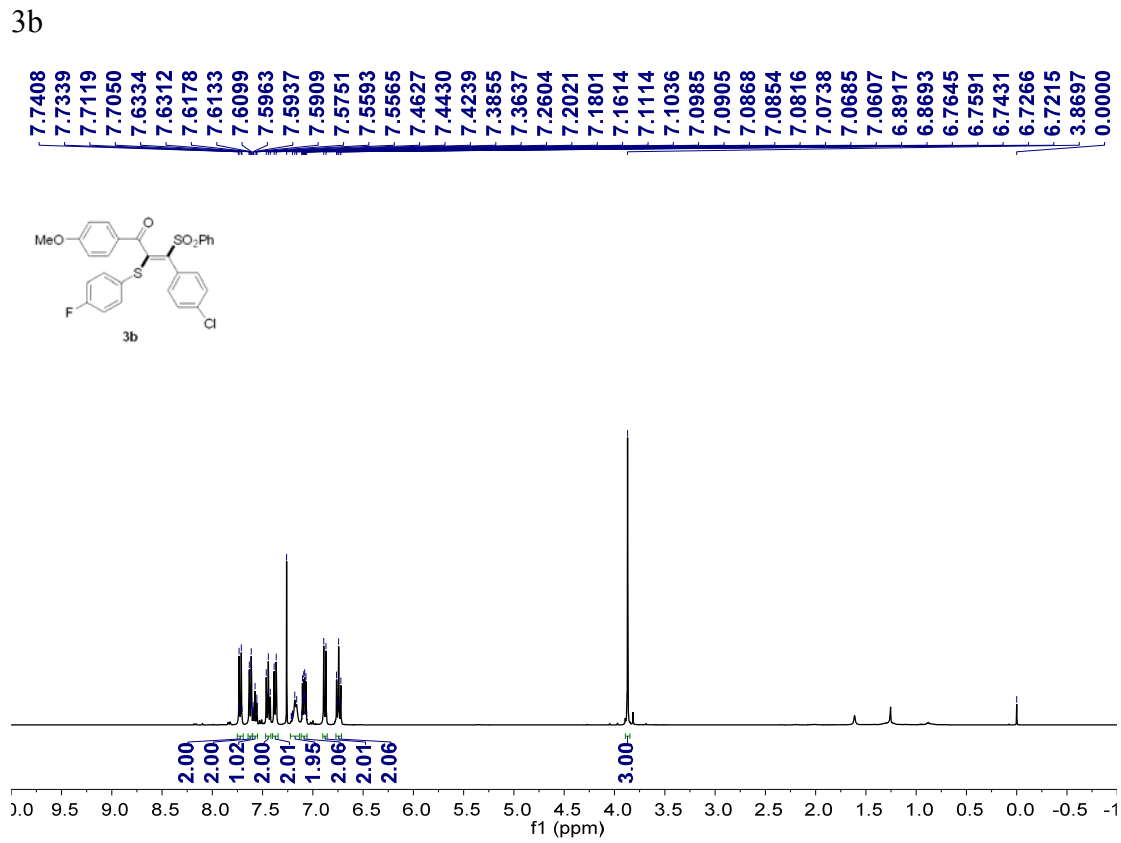



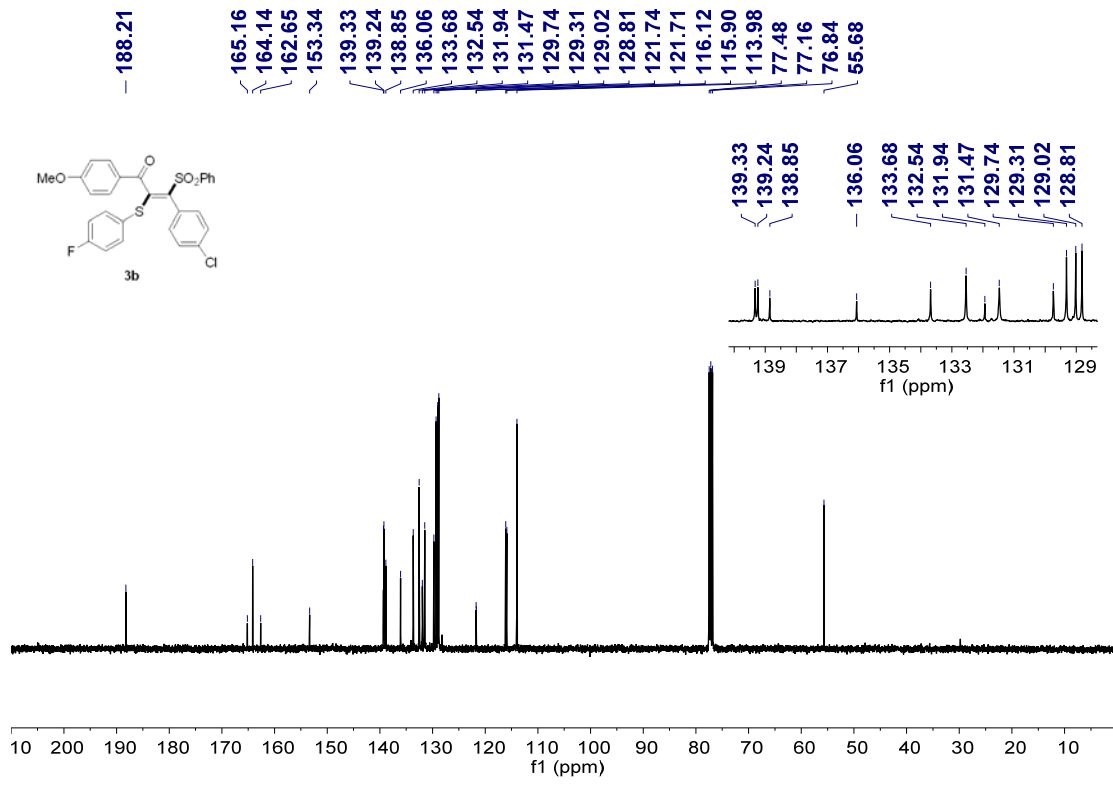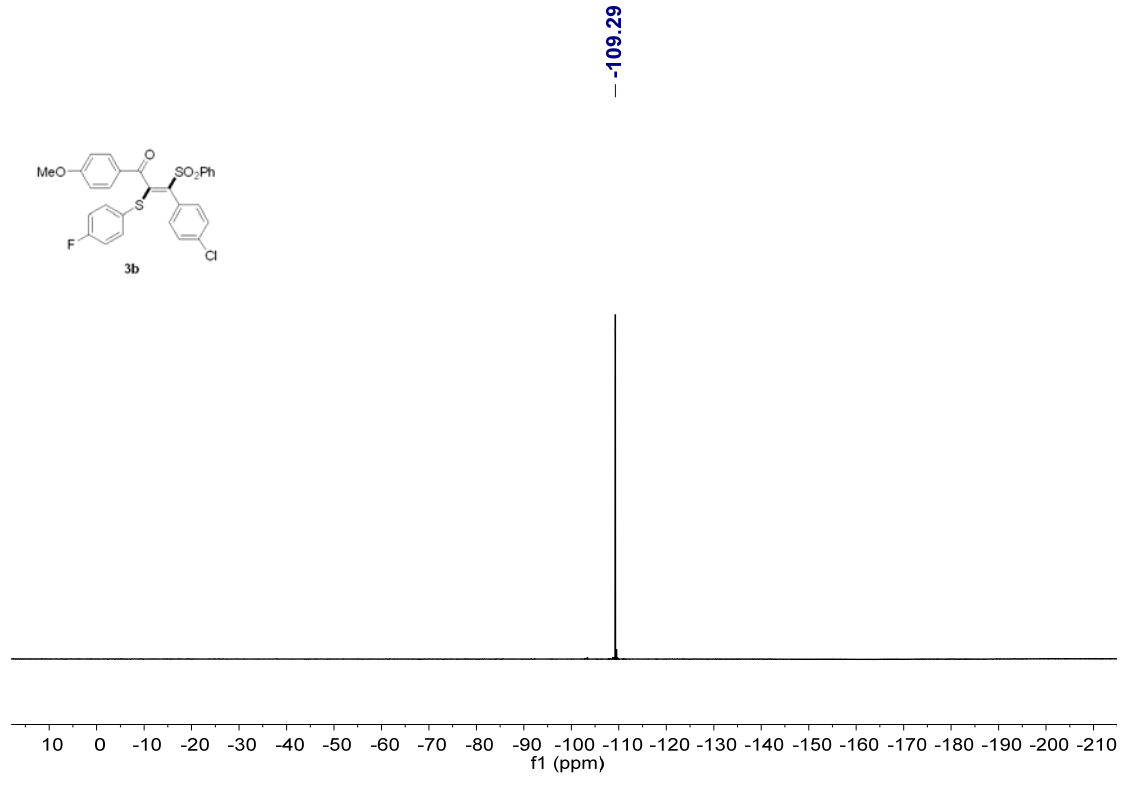

3c

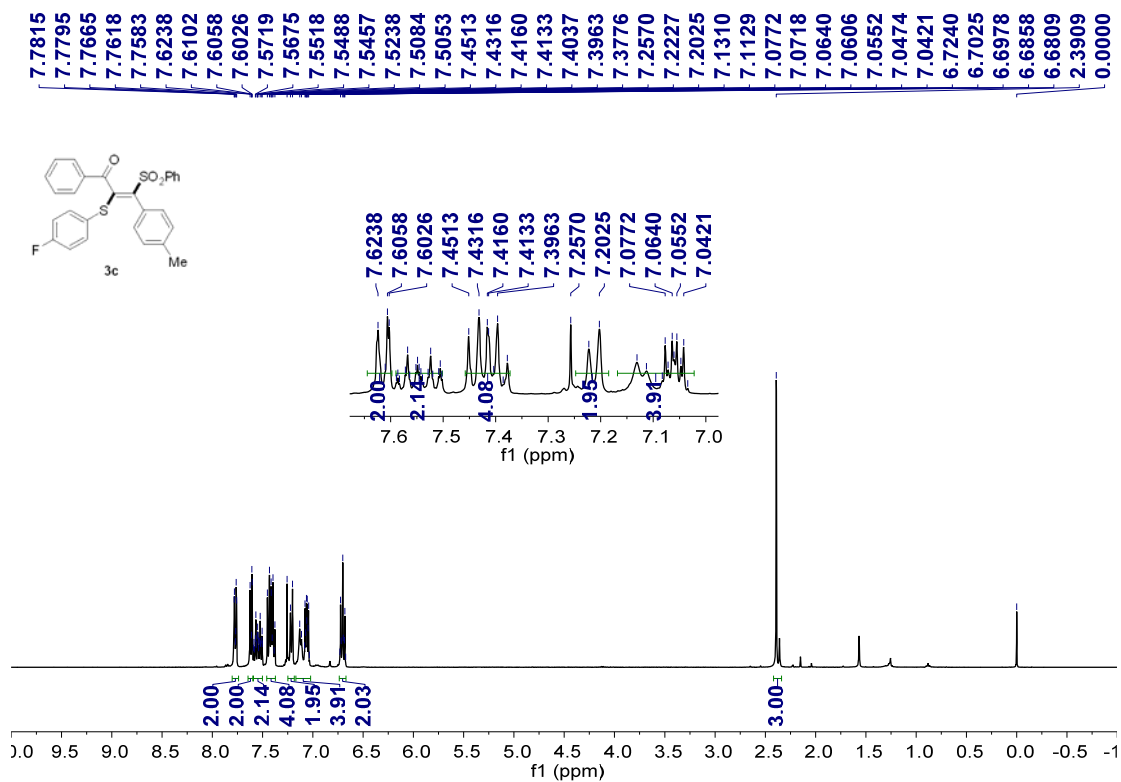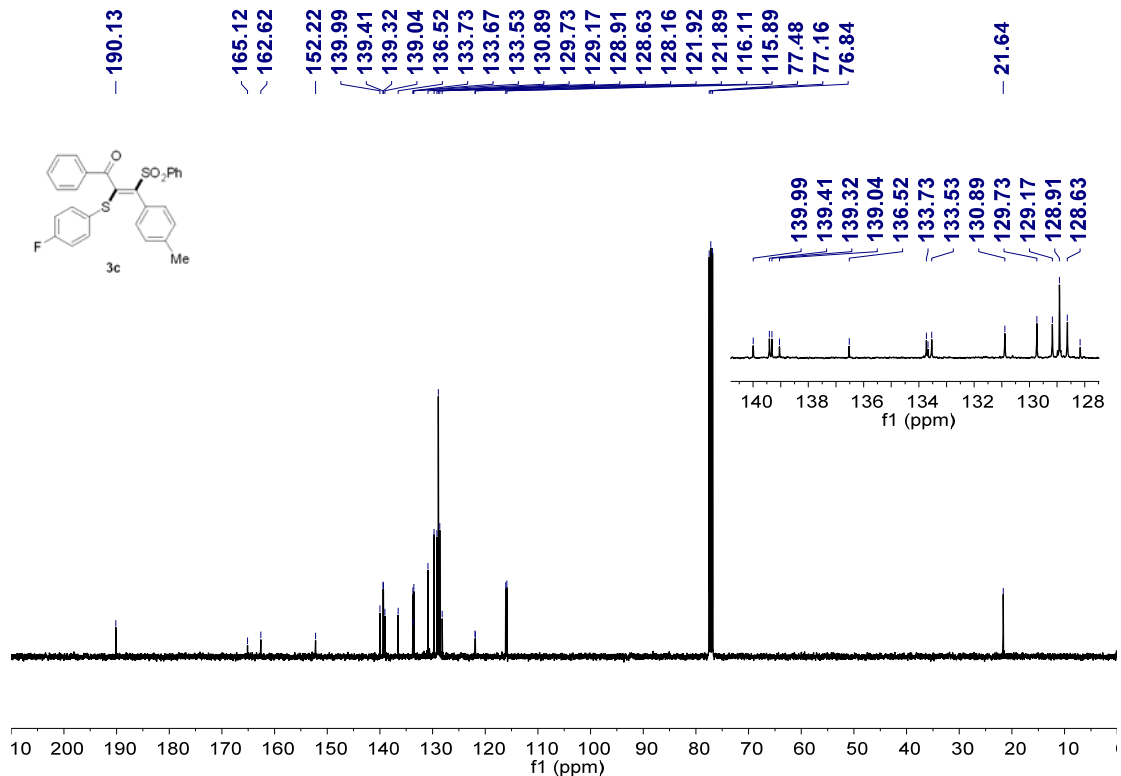

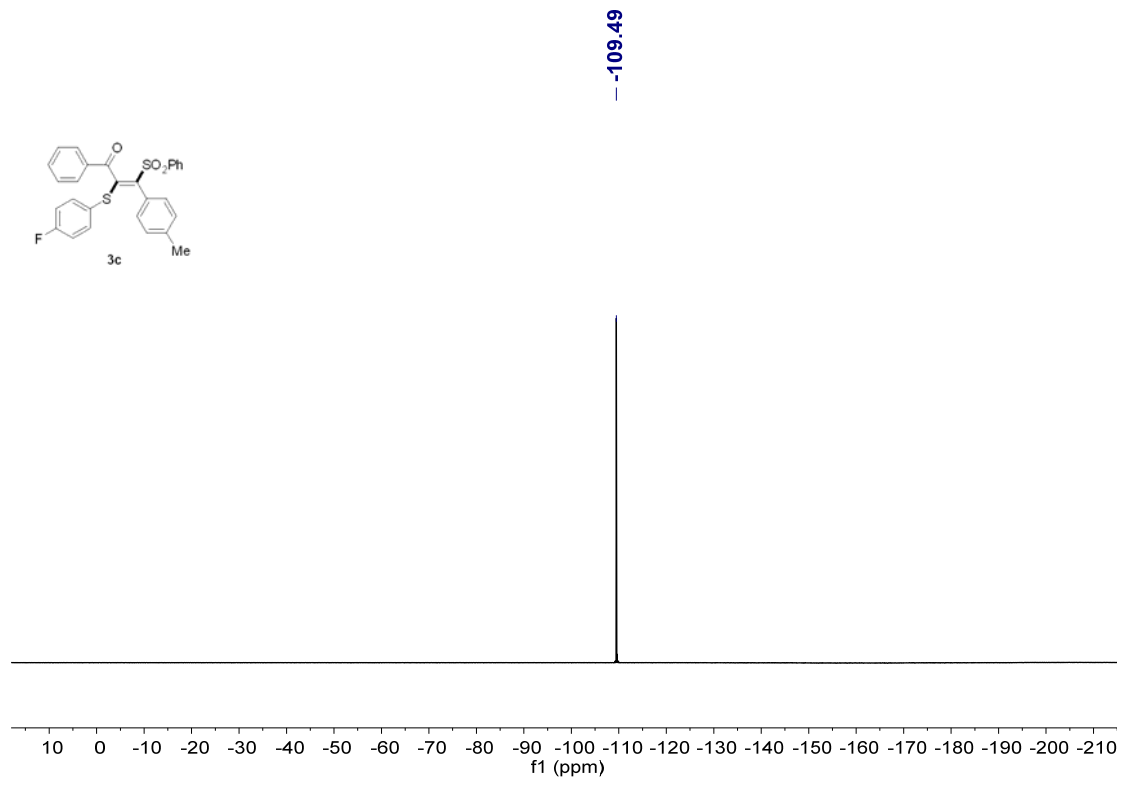

**3d**

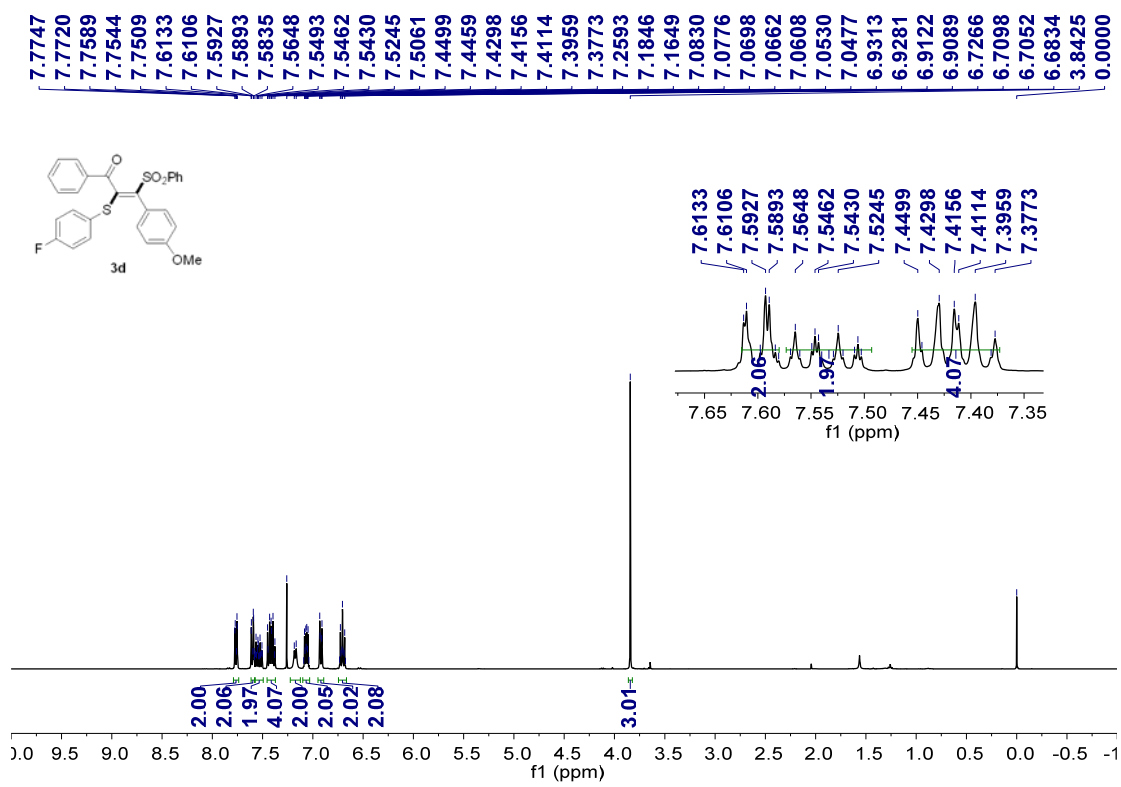

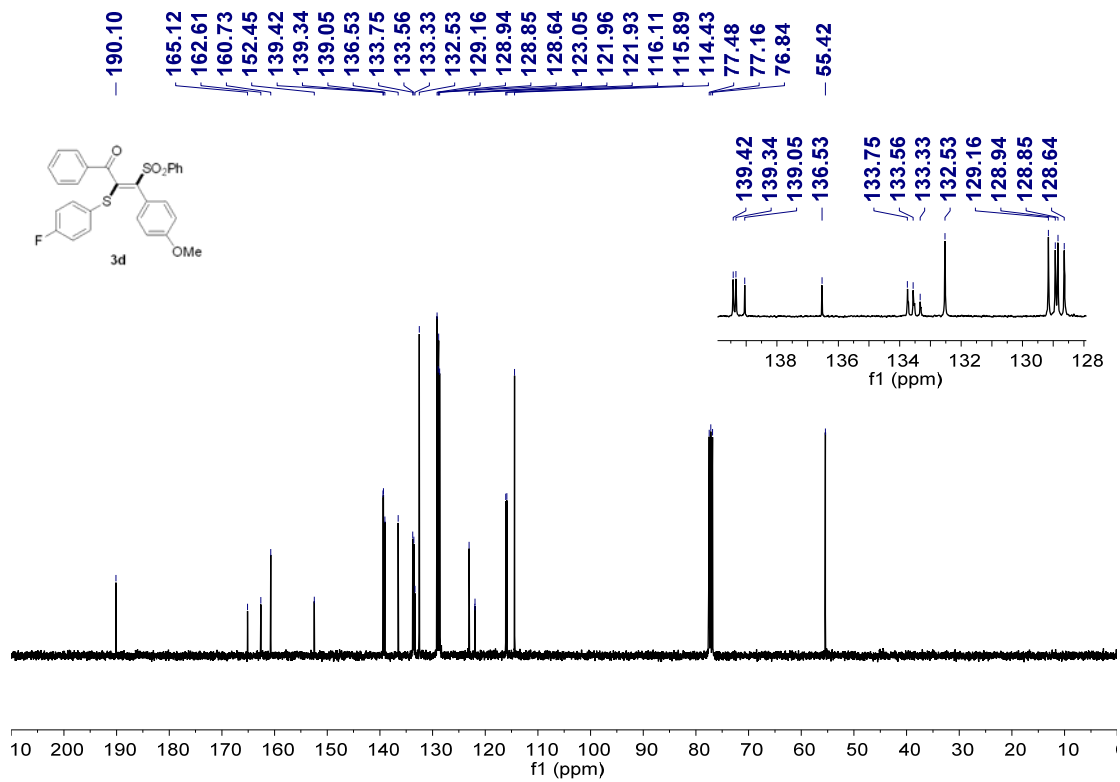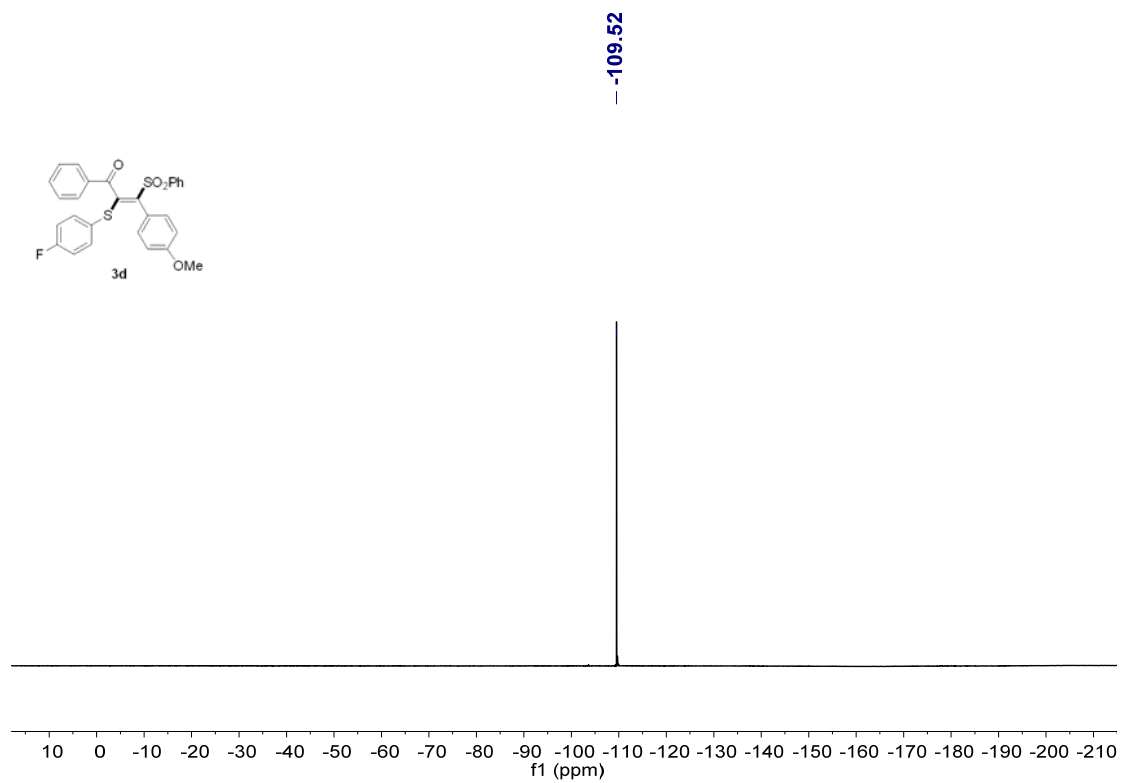

3e

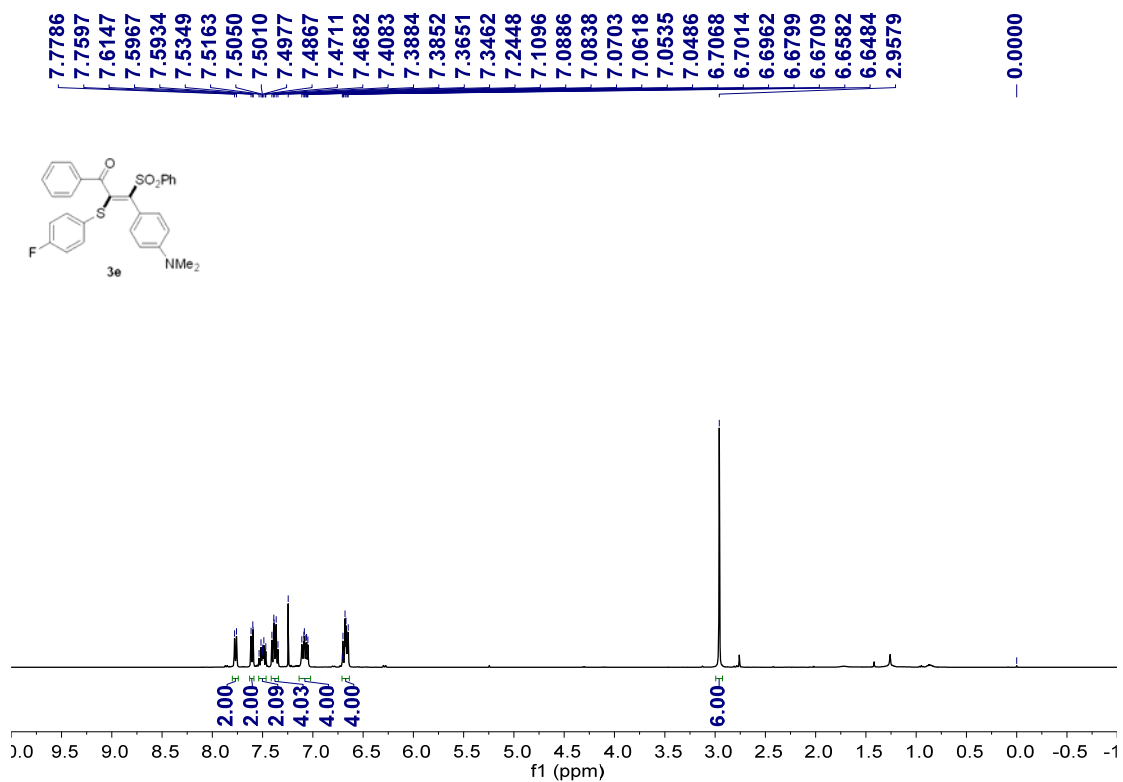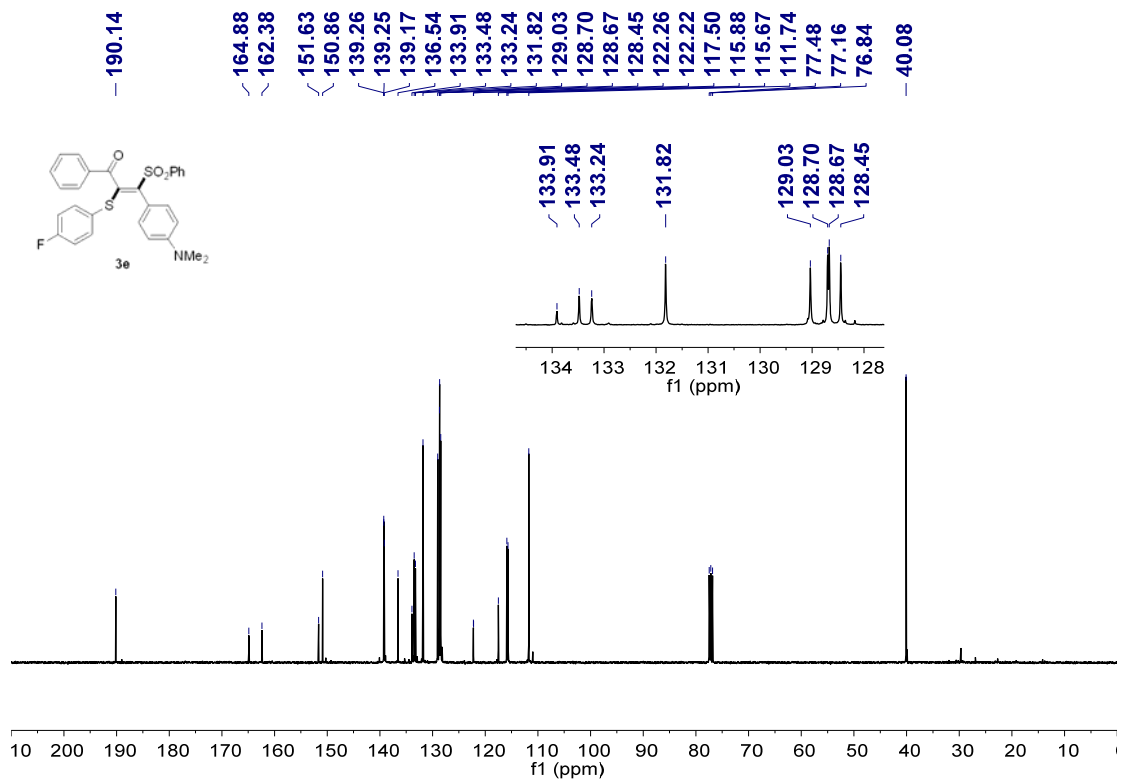

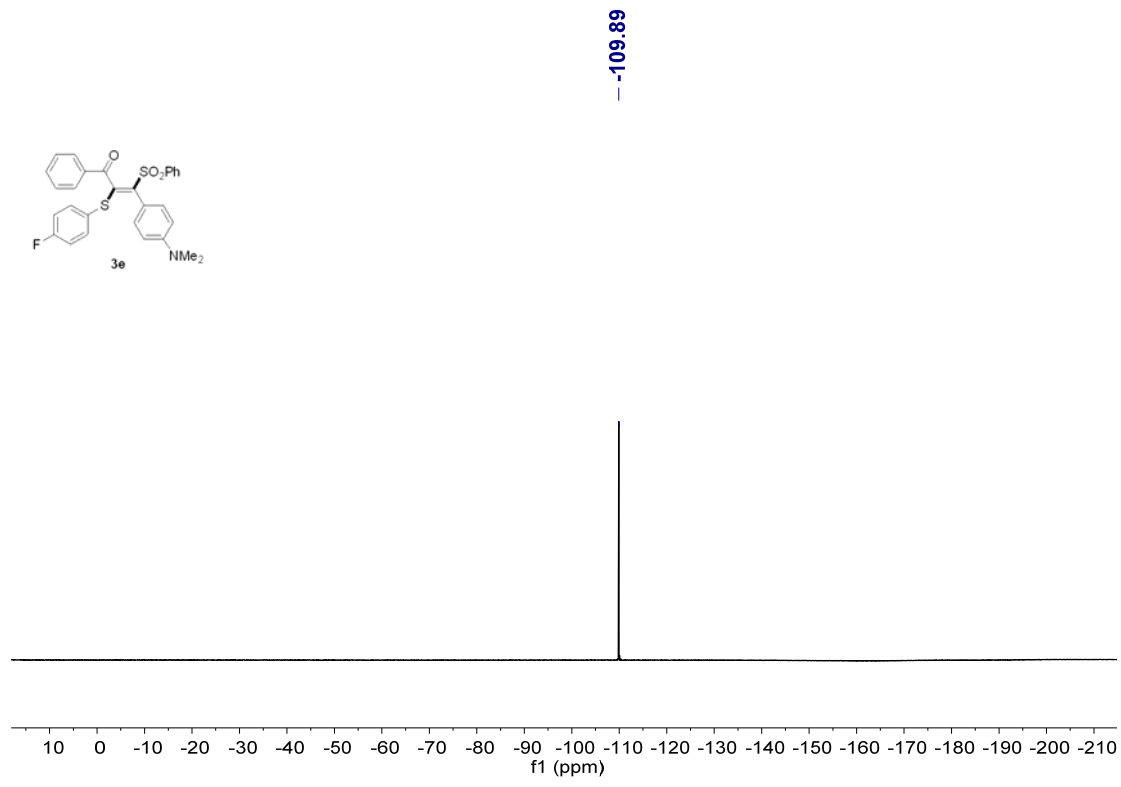

3f

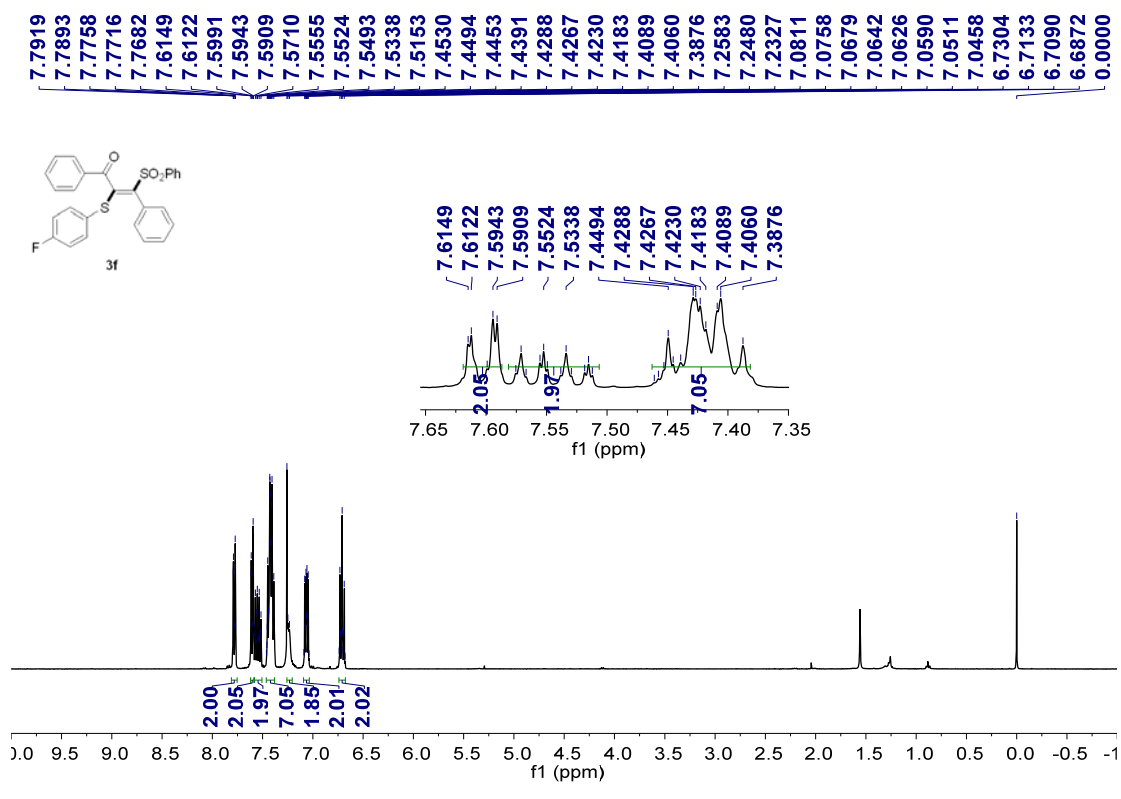

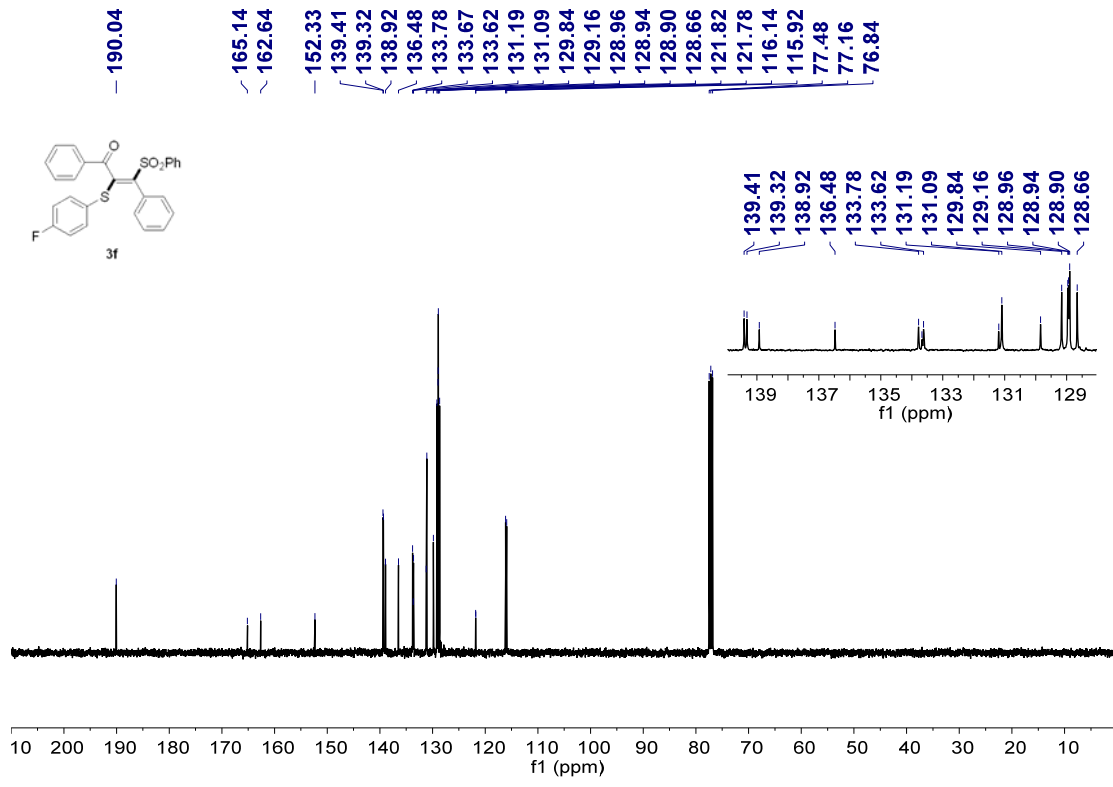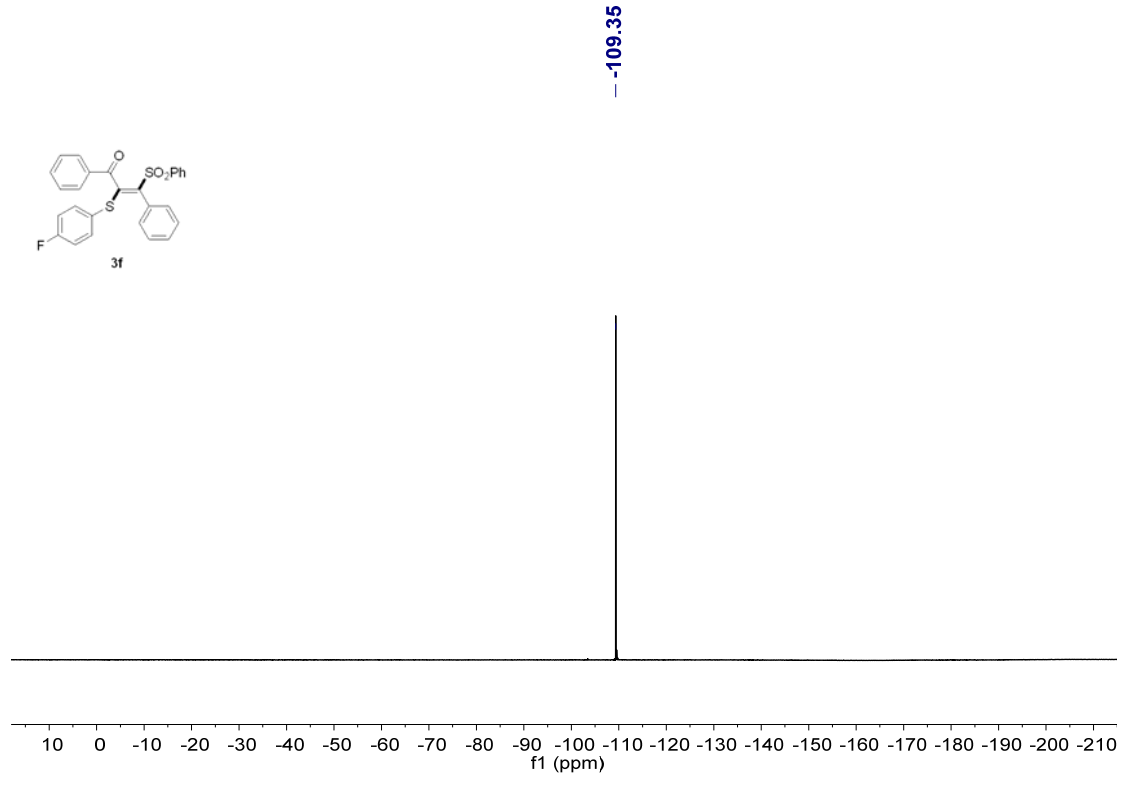

3g

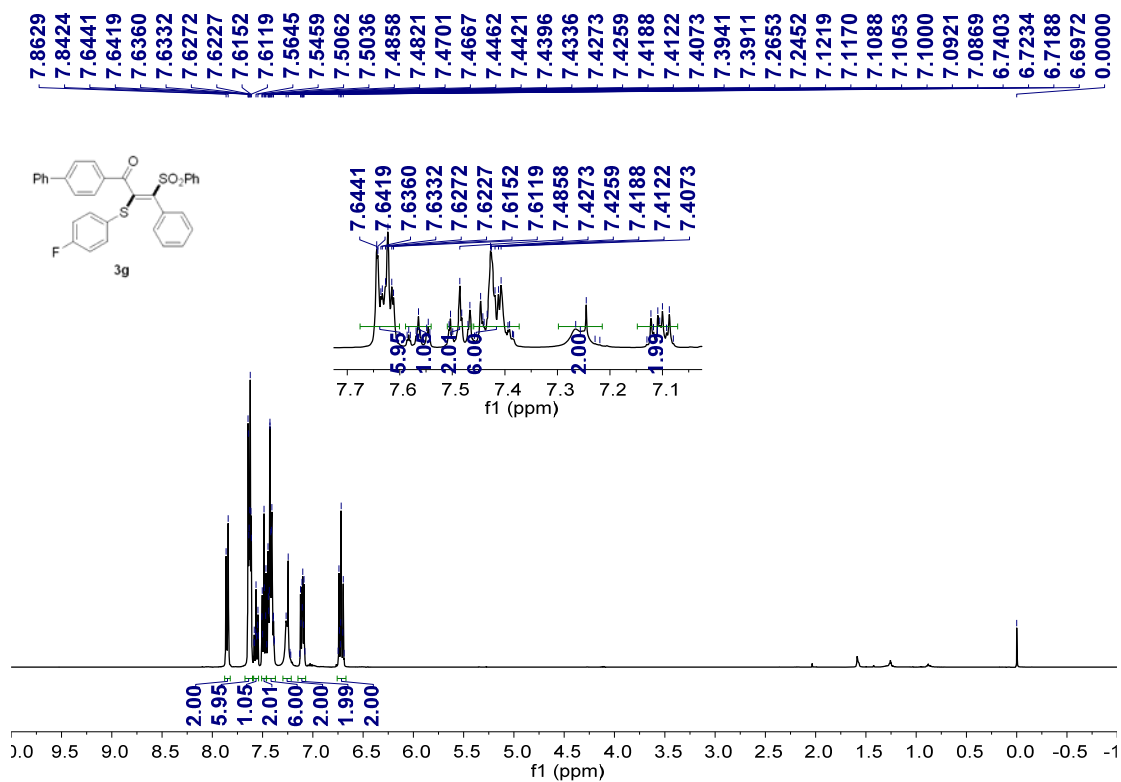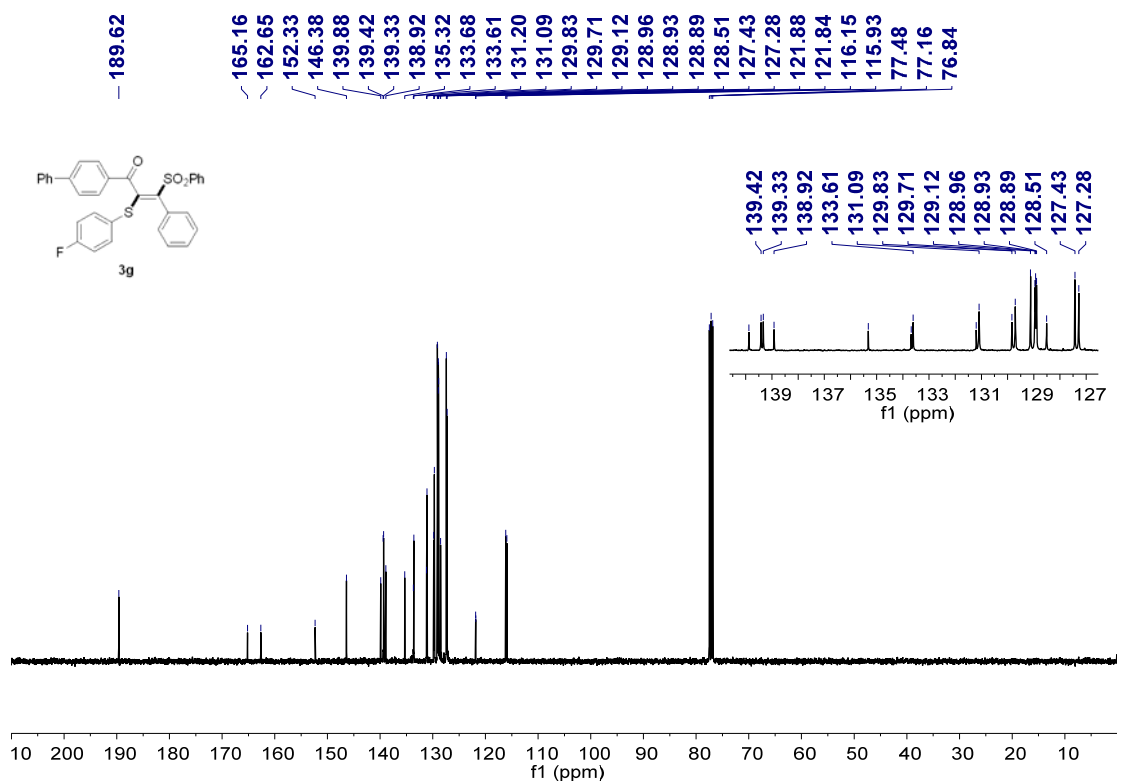



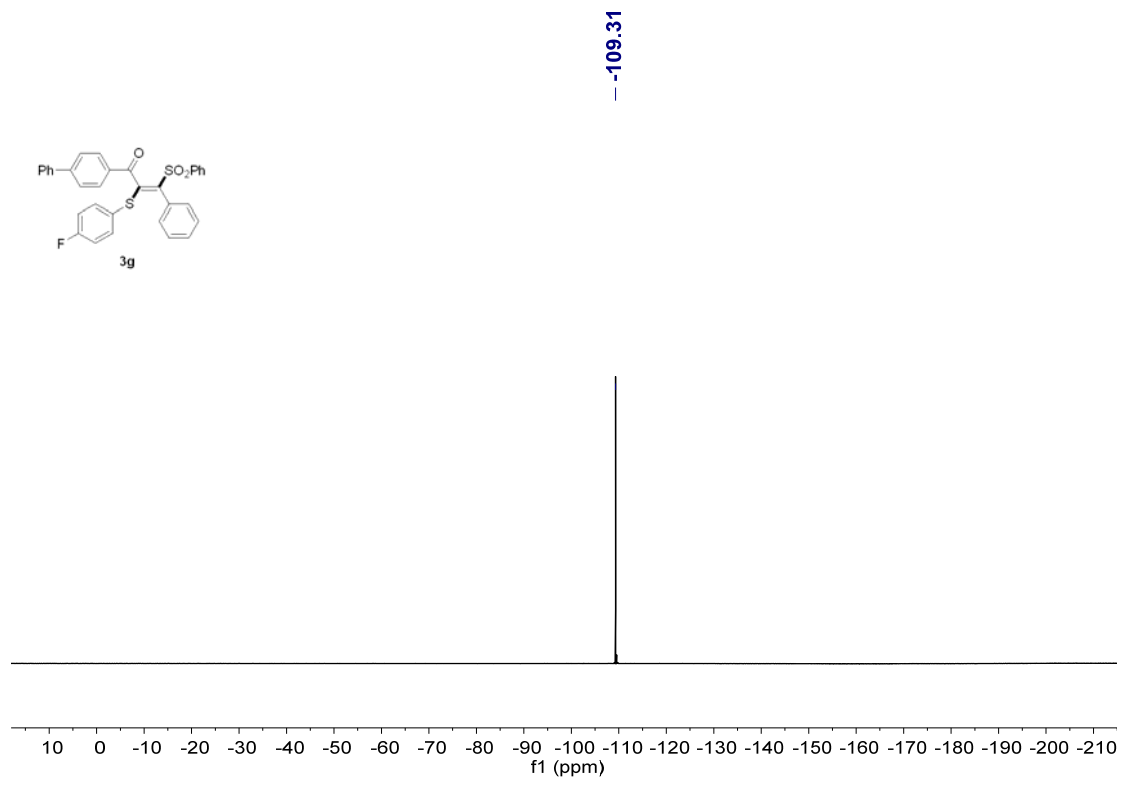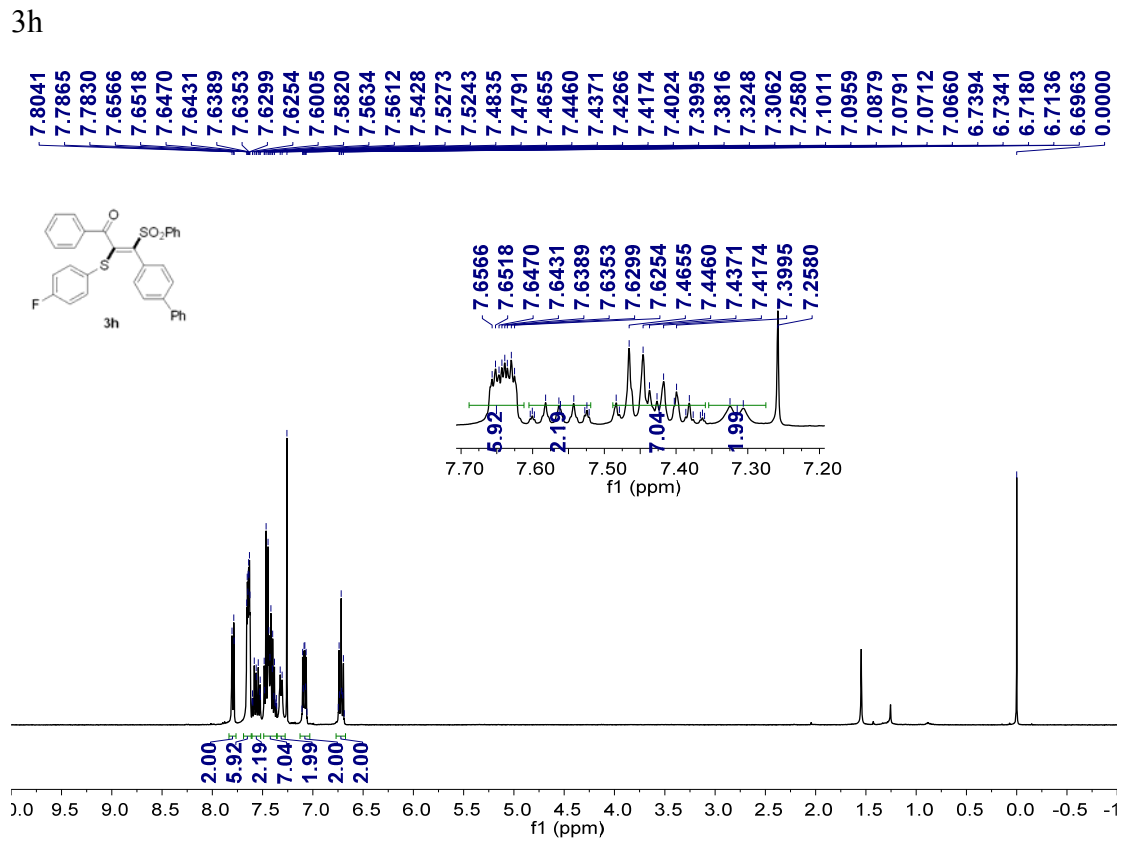

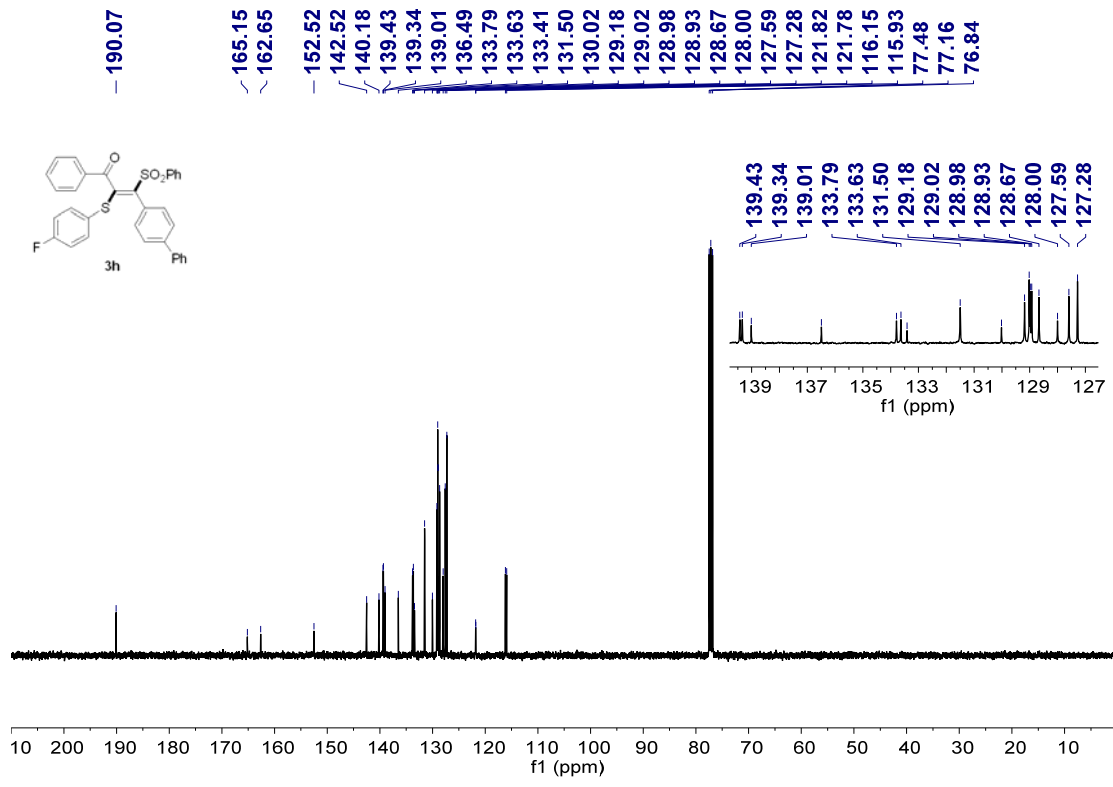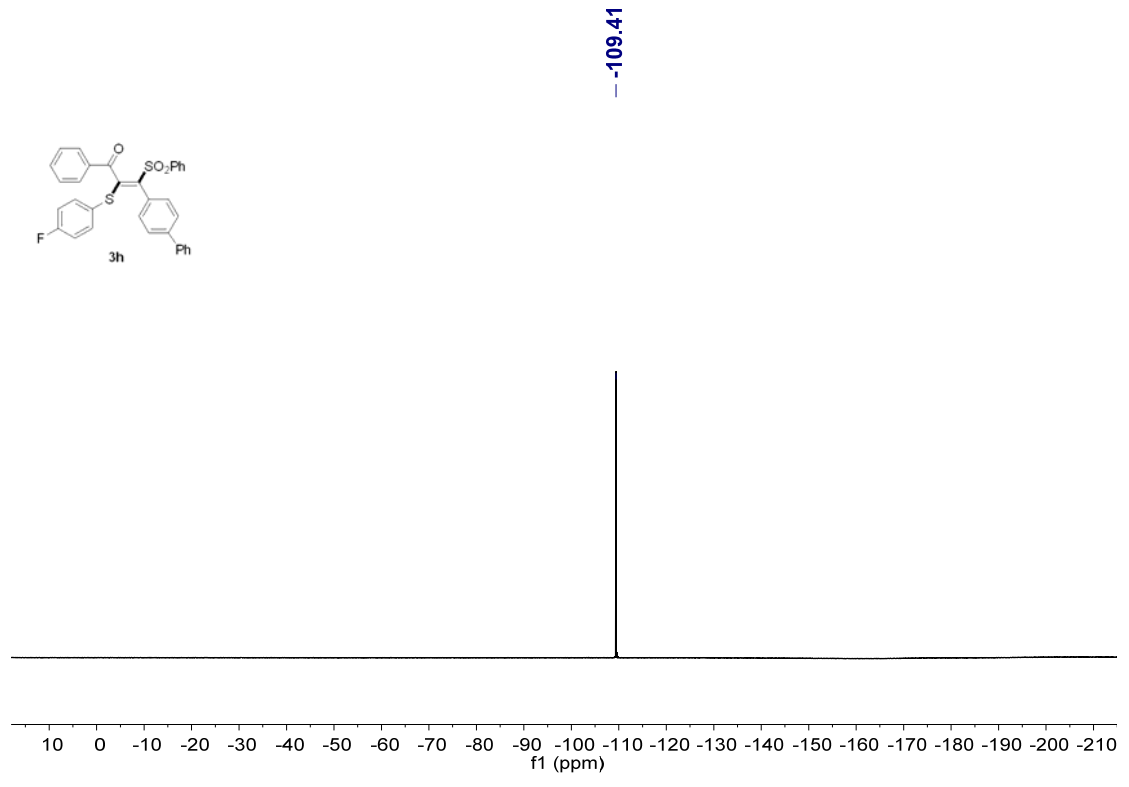

3i

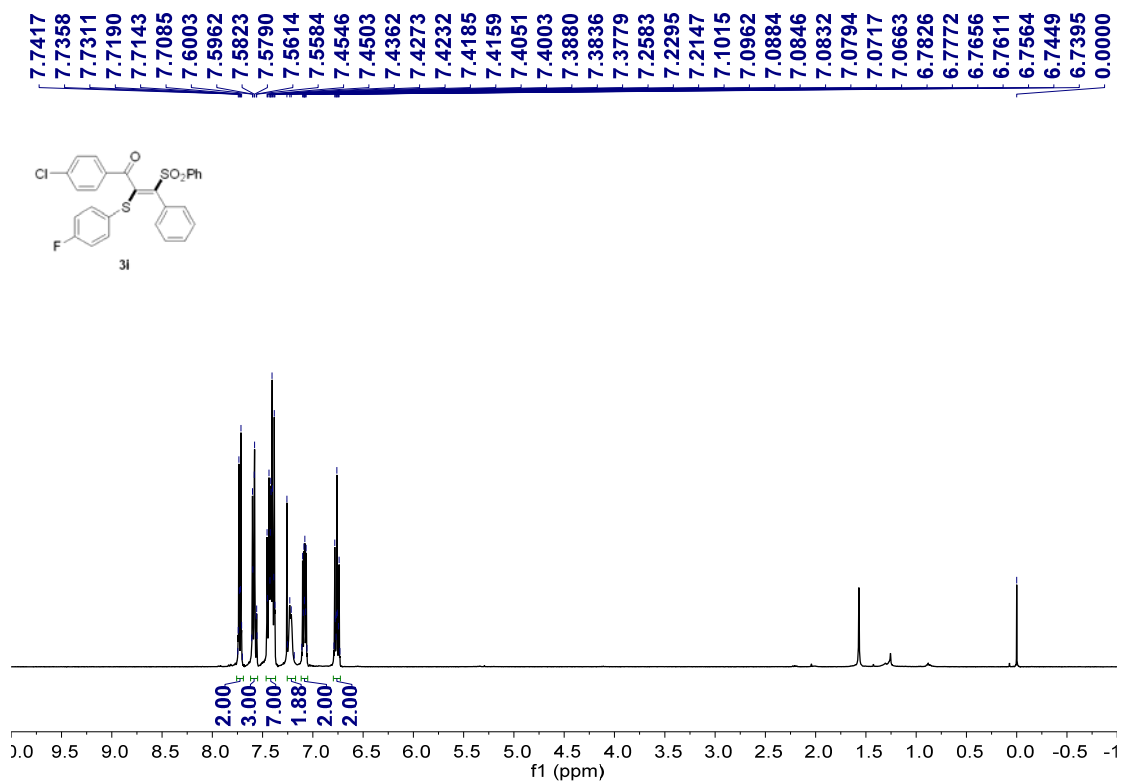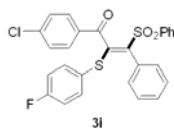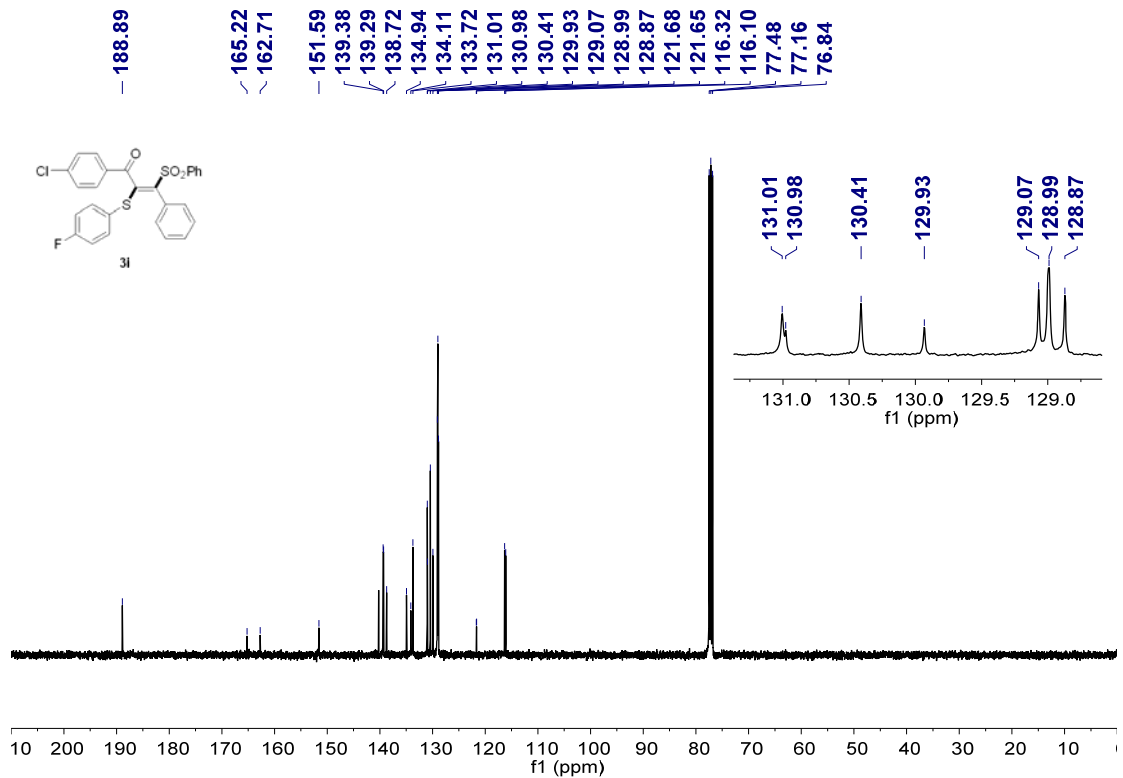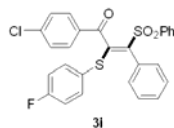

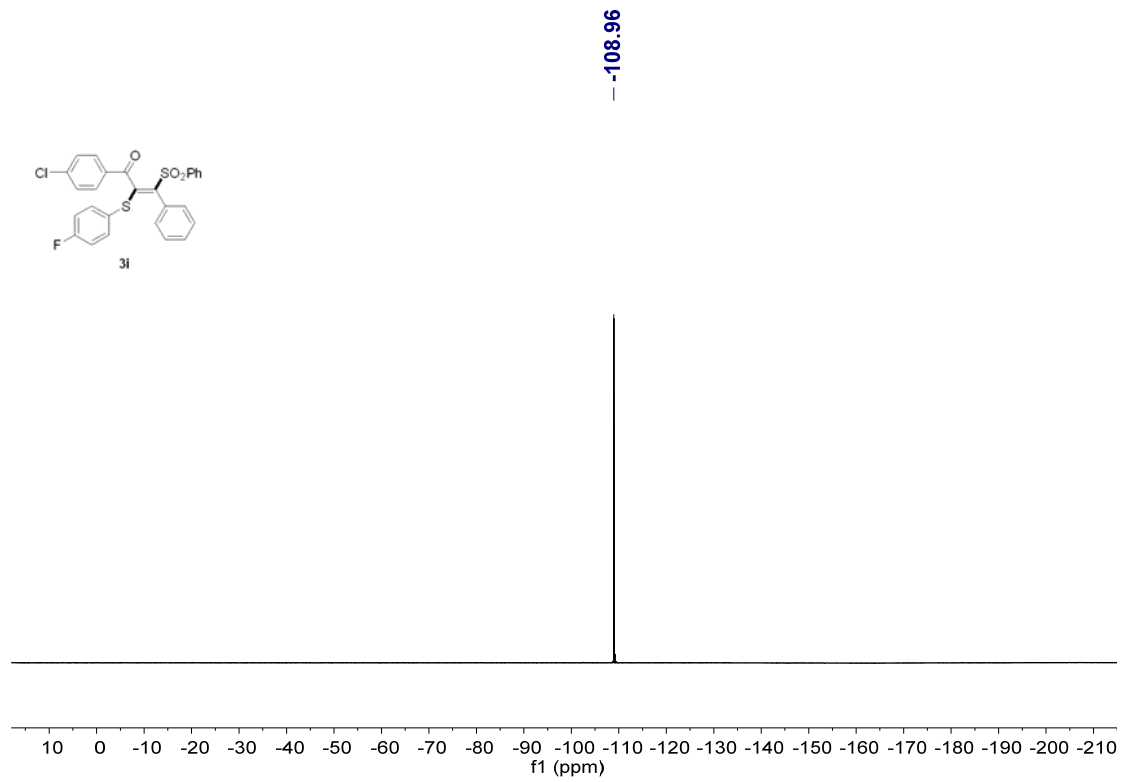

3j

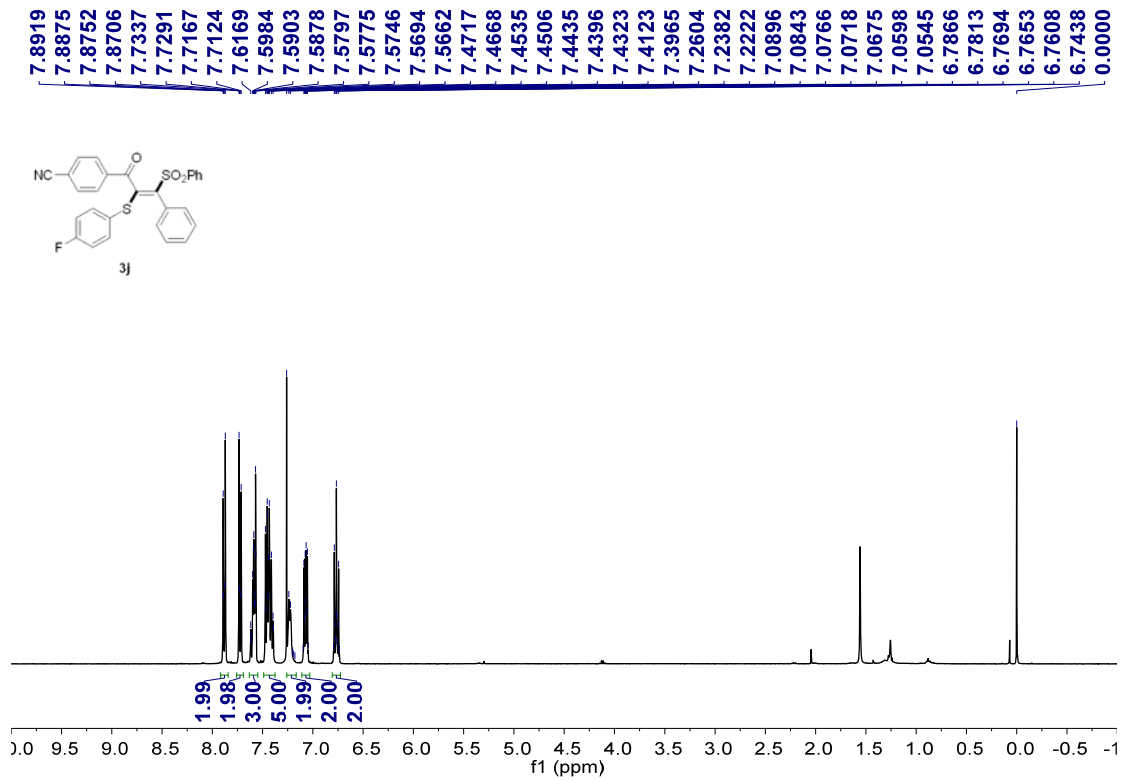

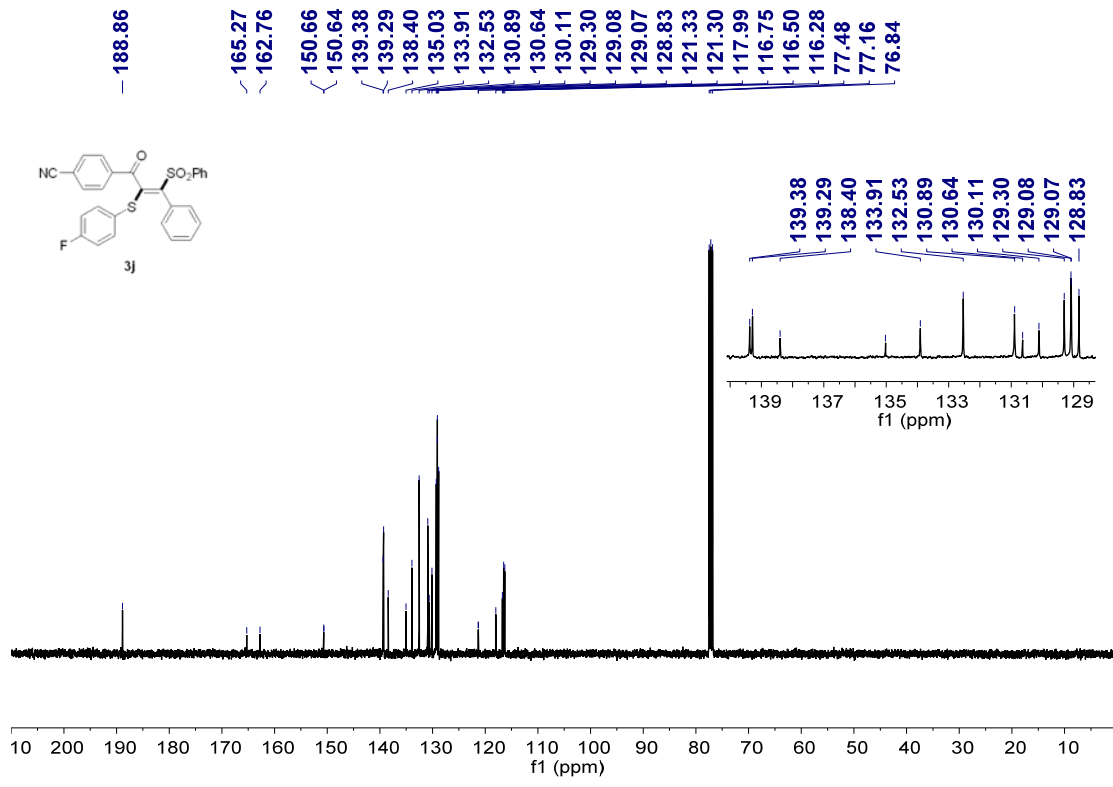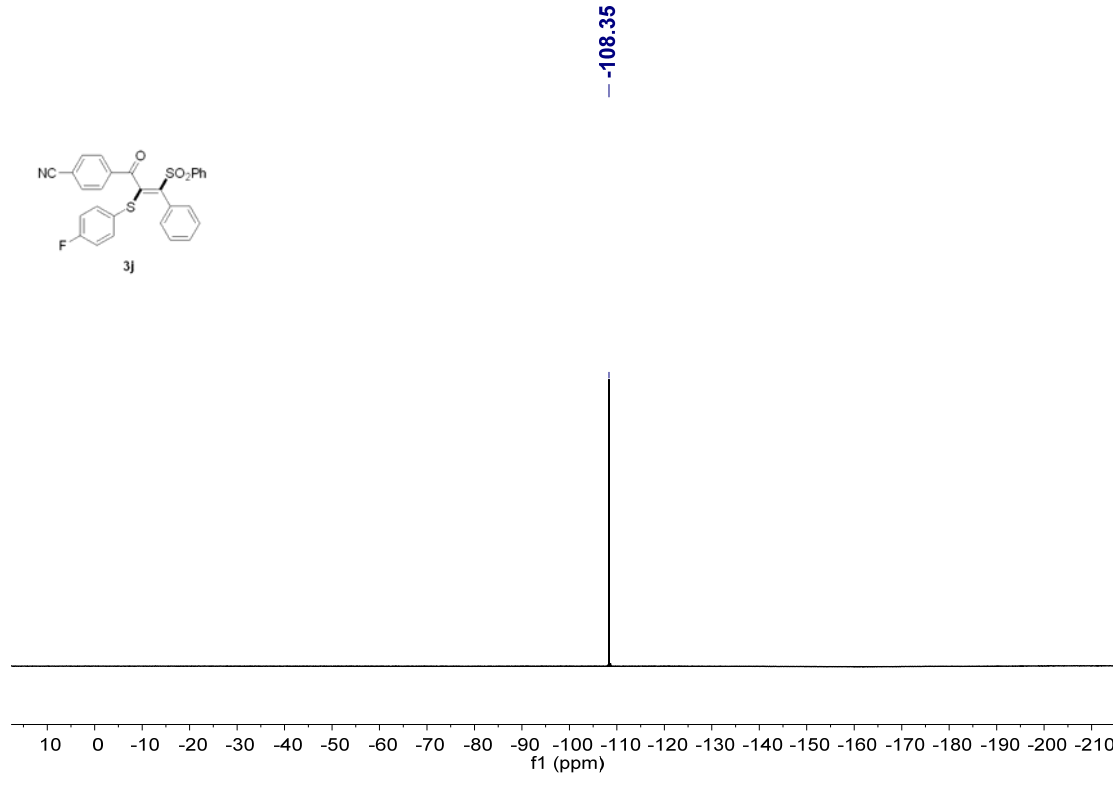

3k

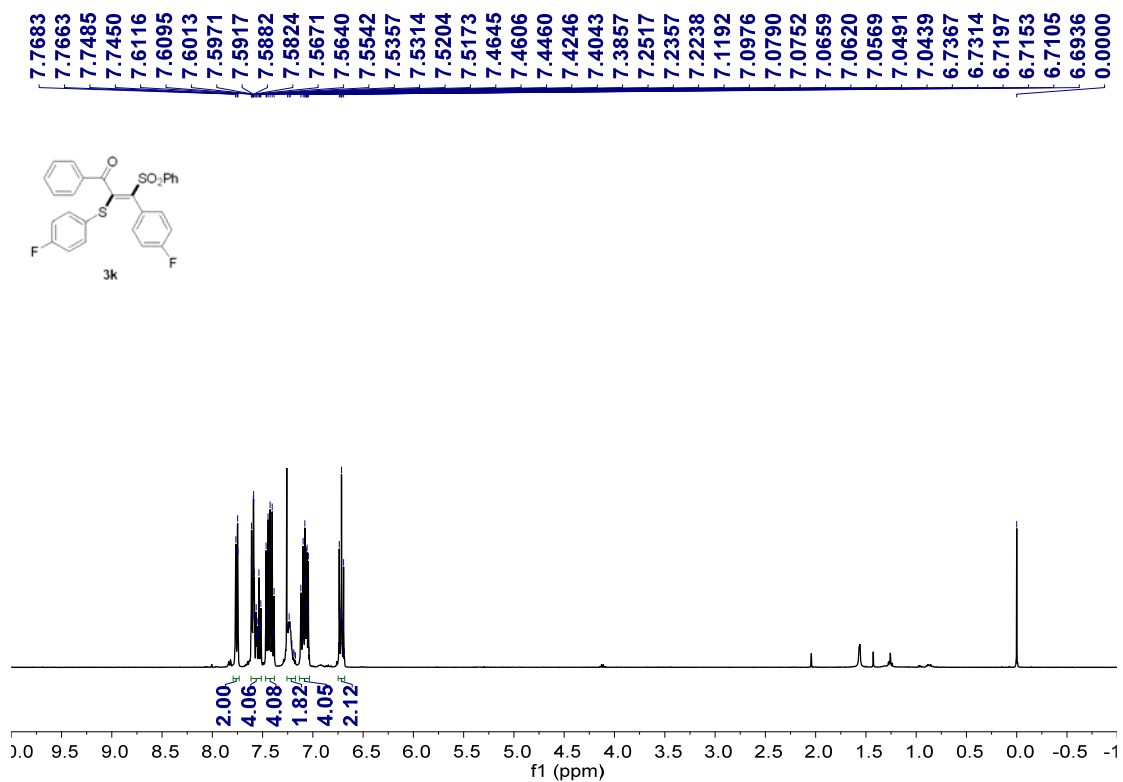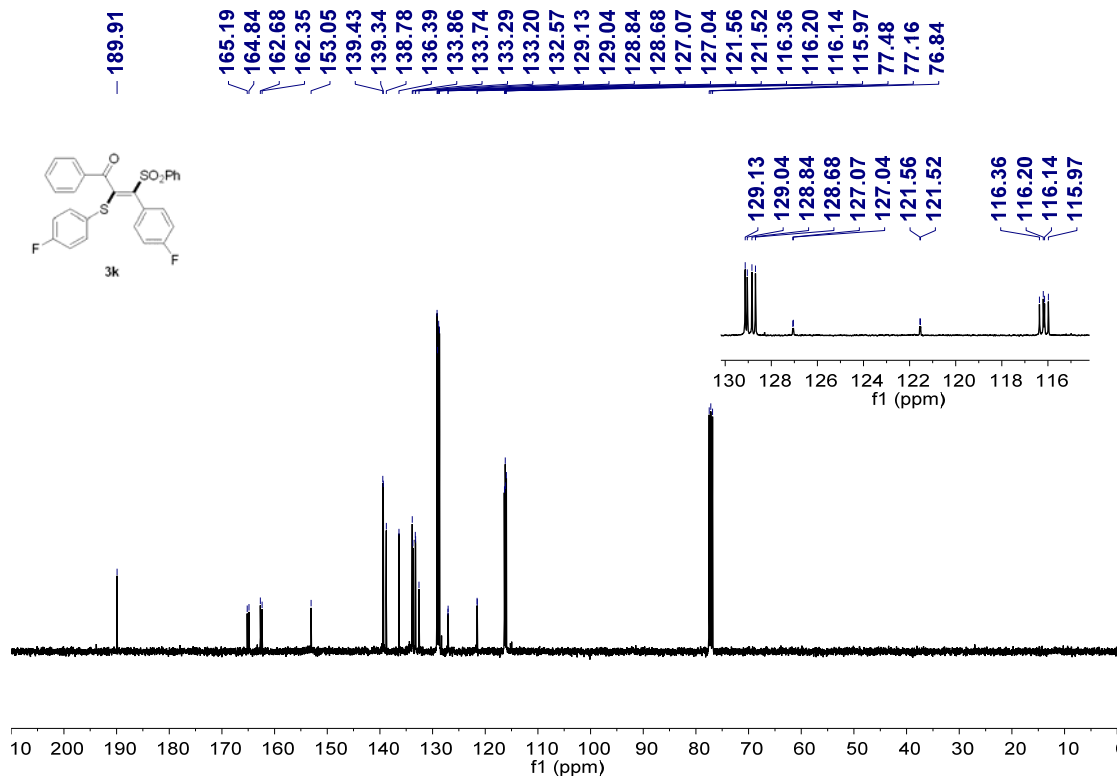

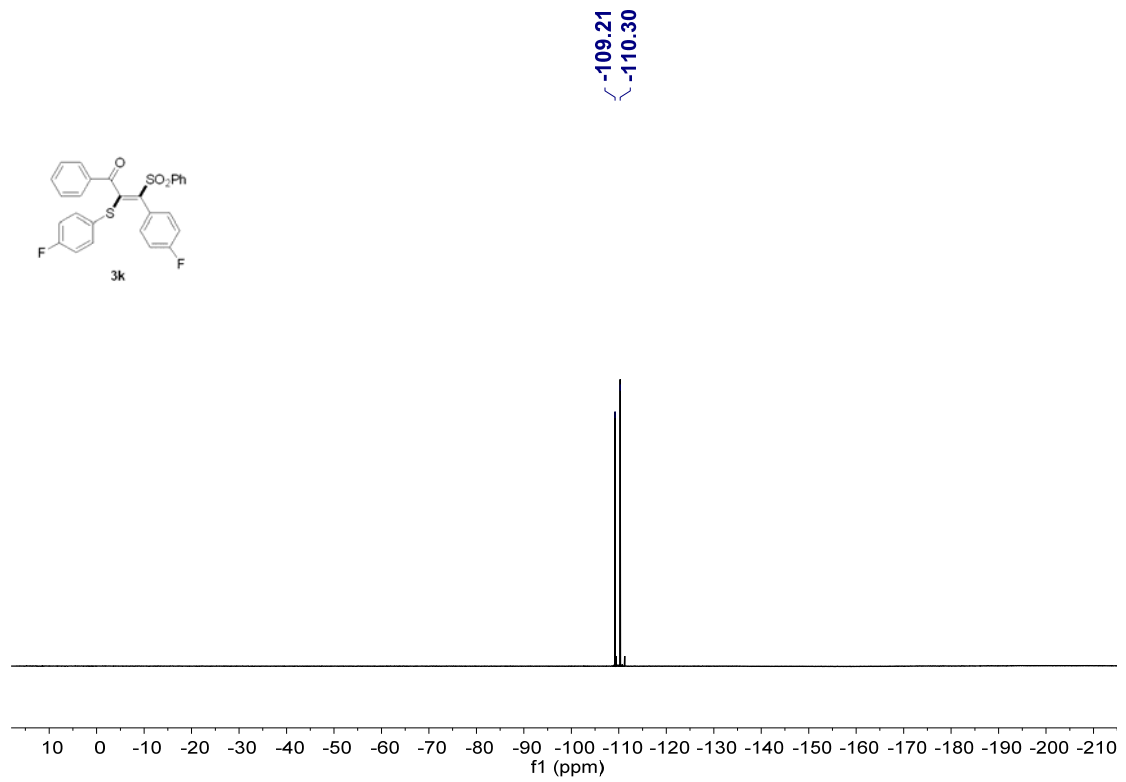

3l

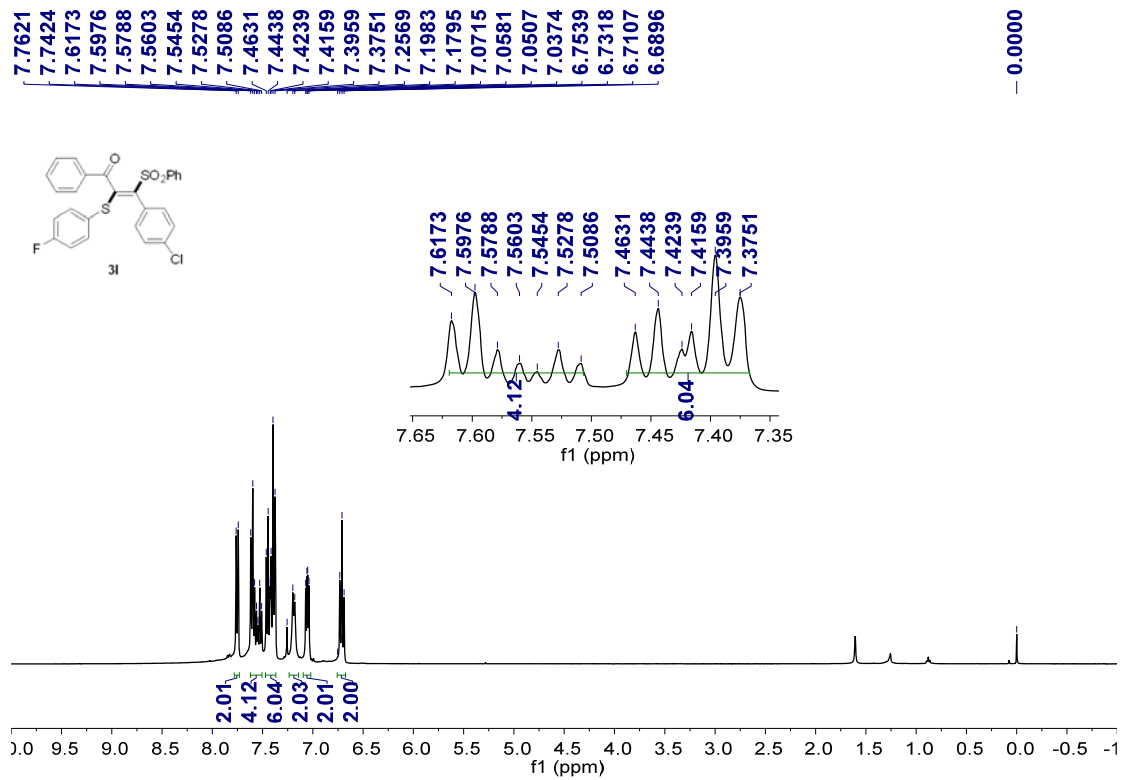

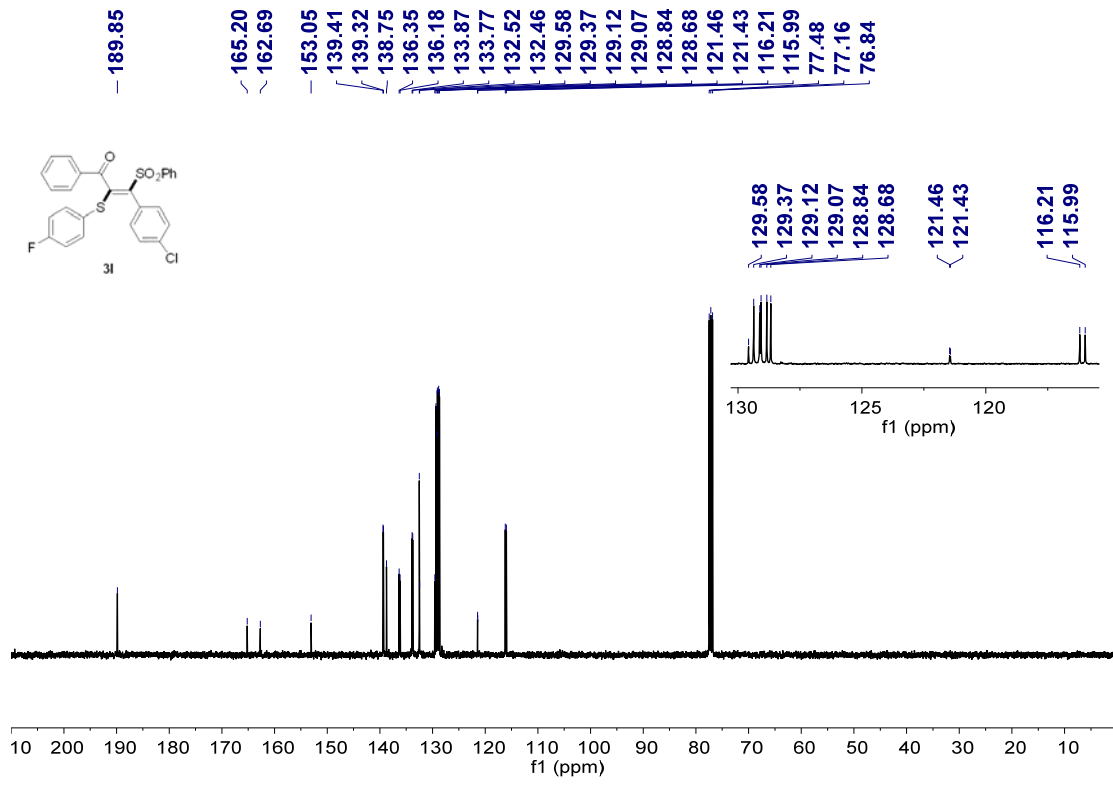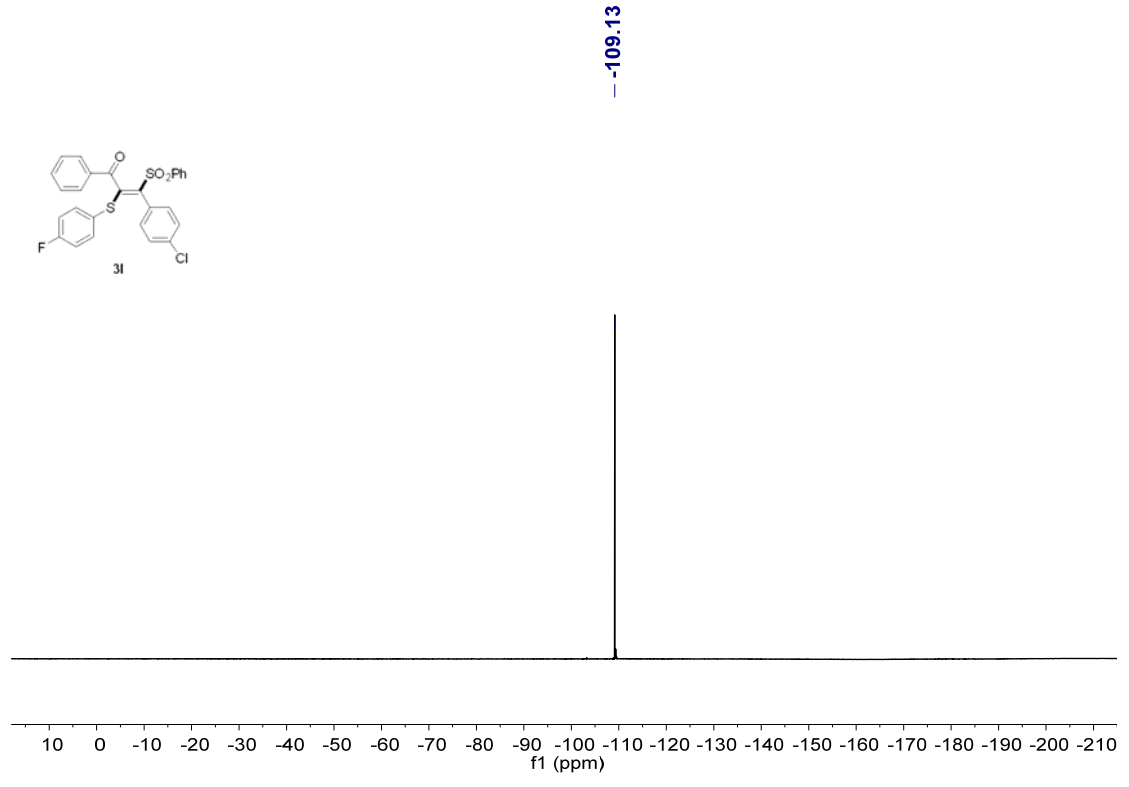



3m

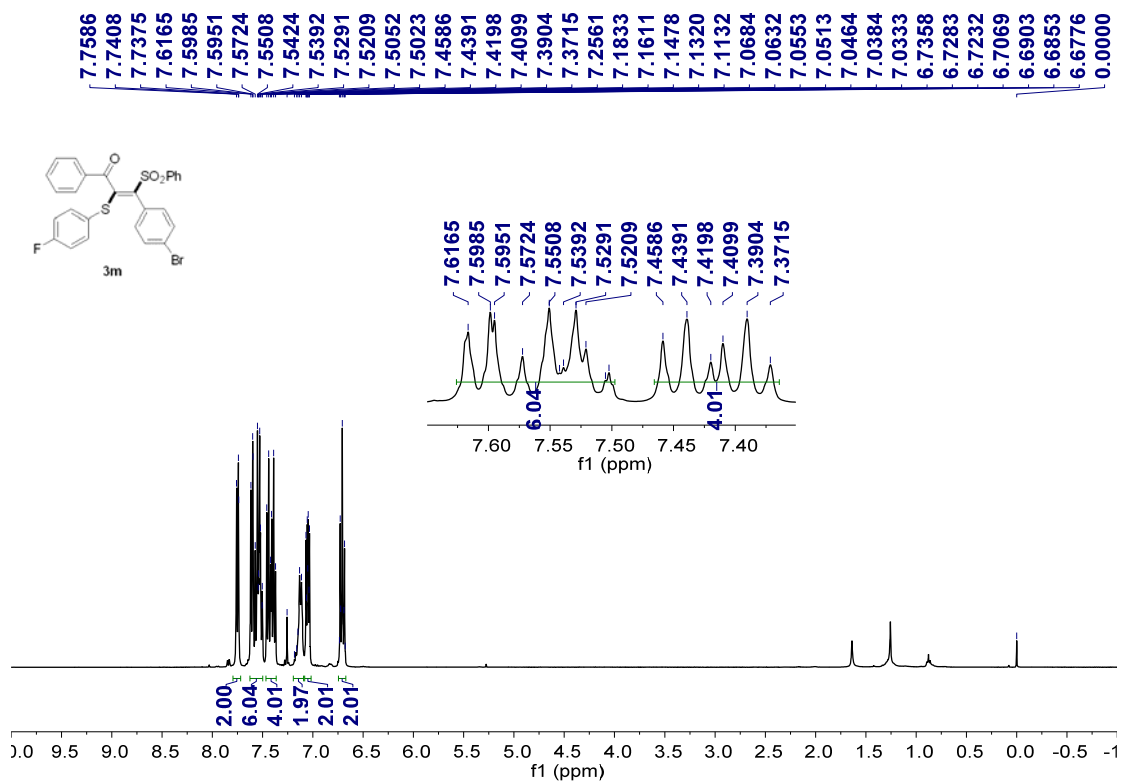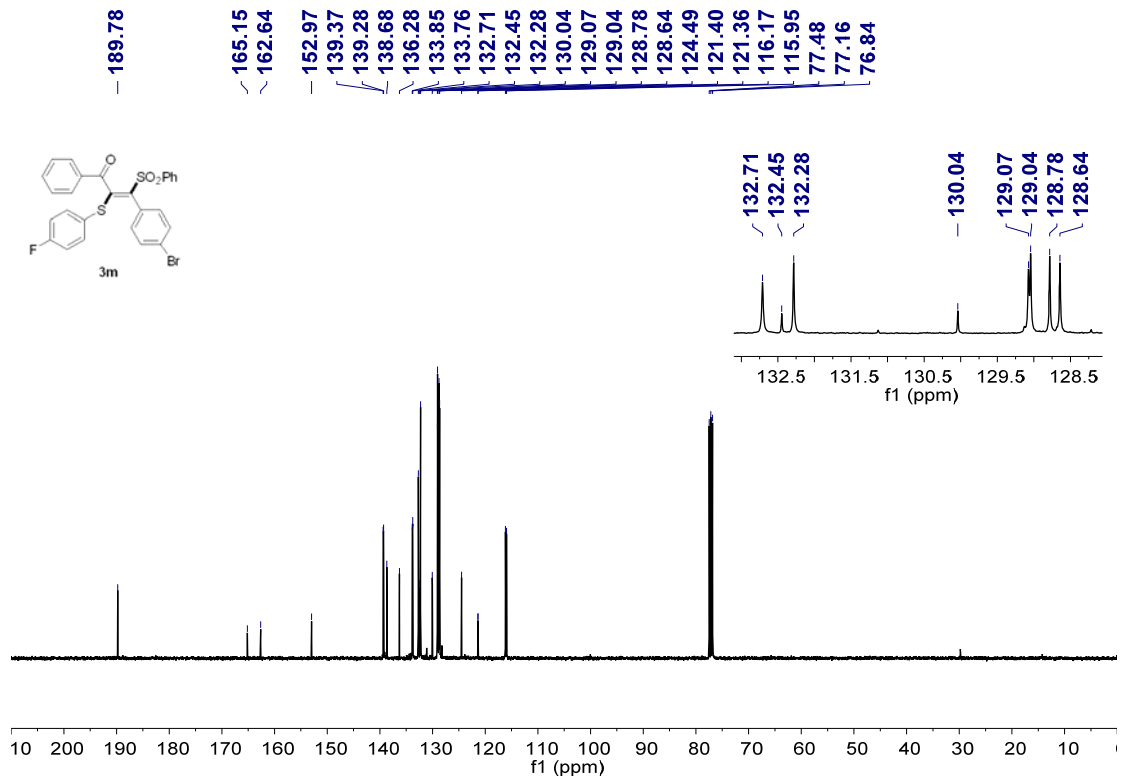

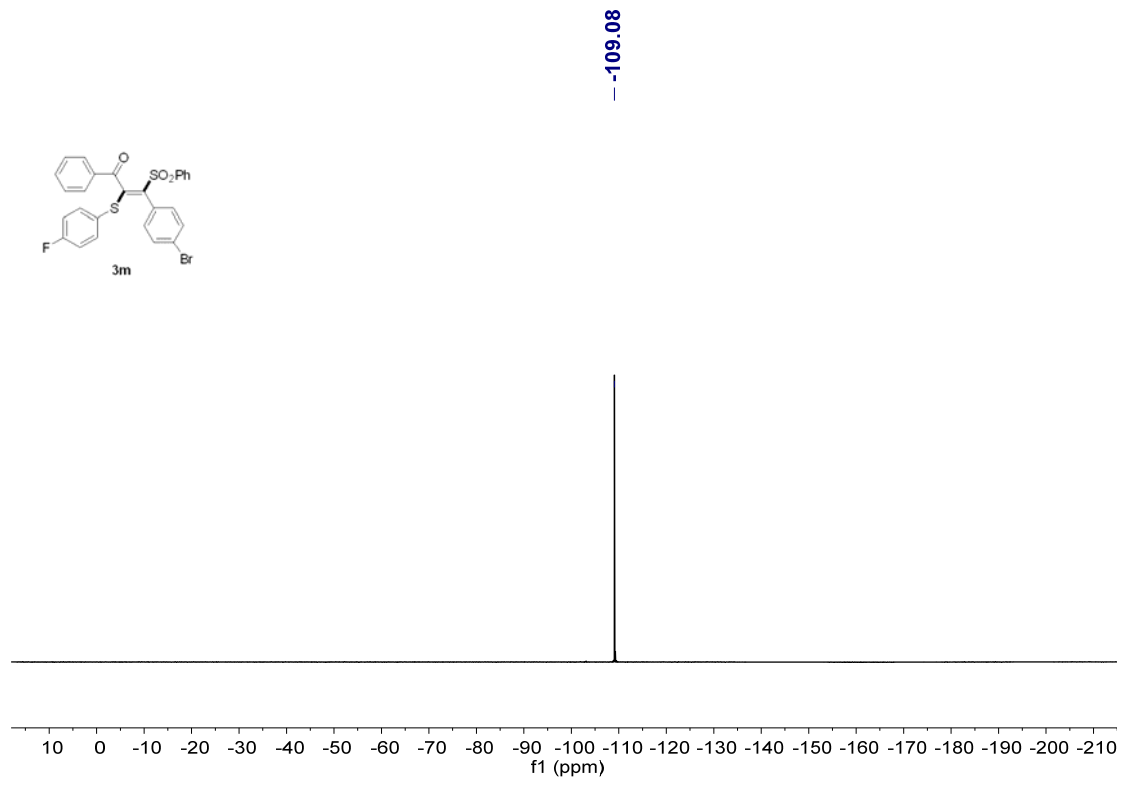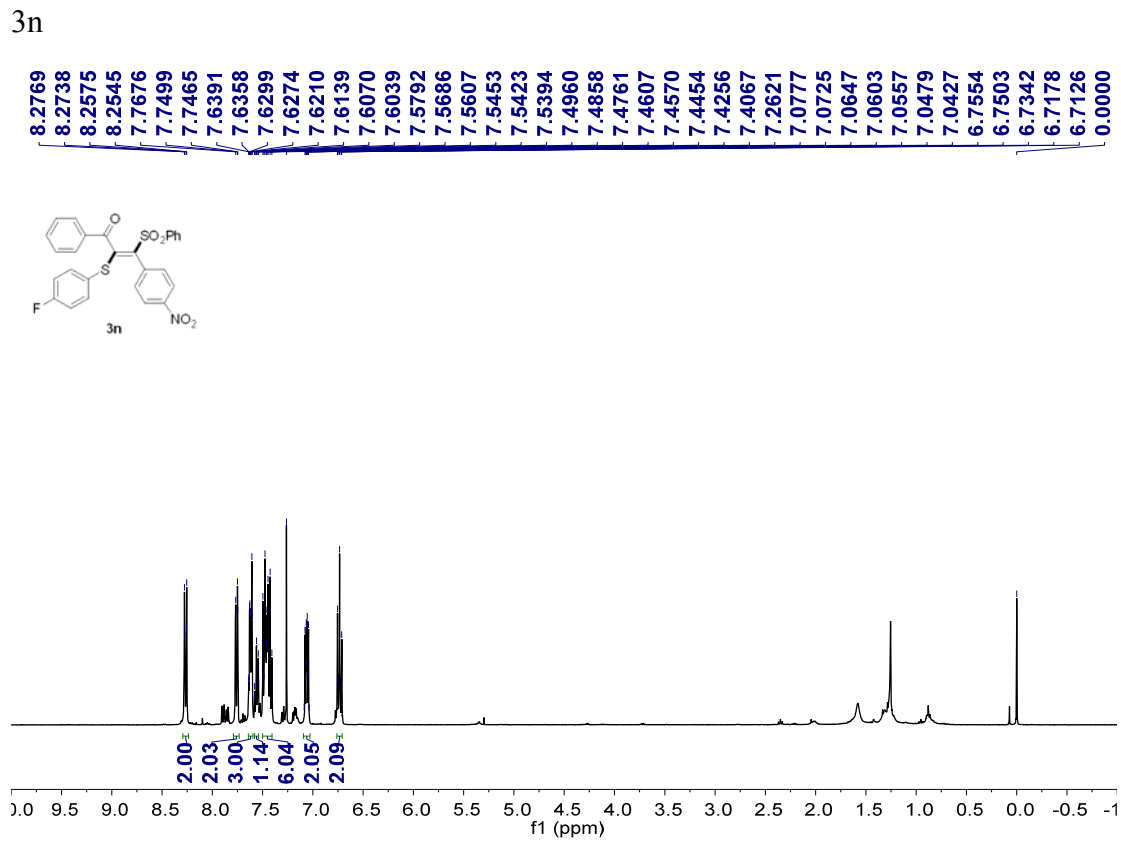

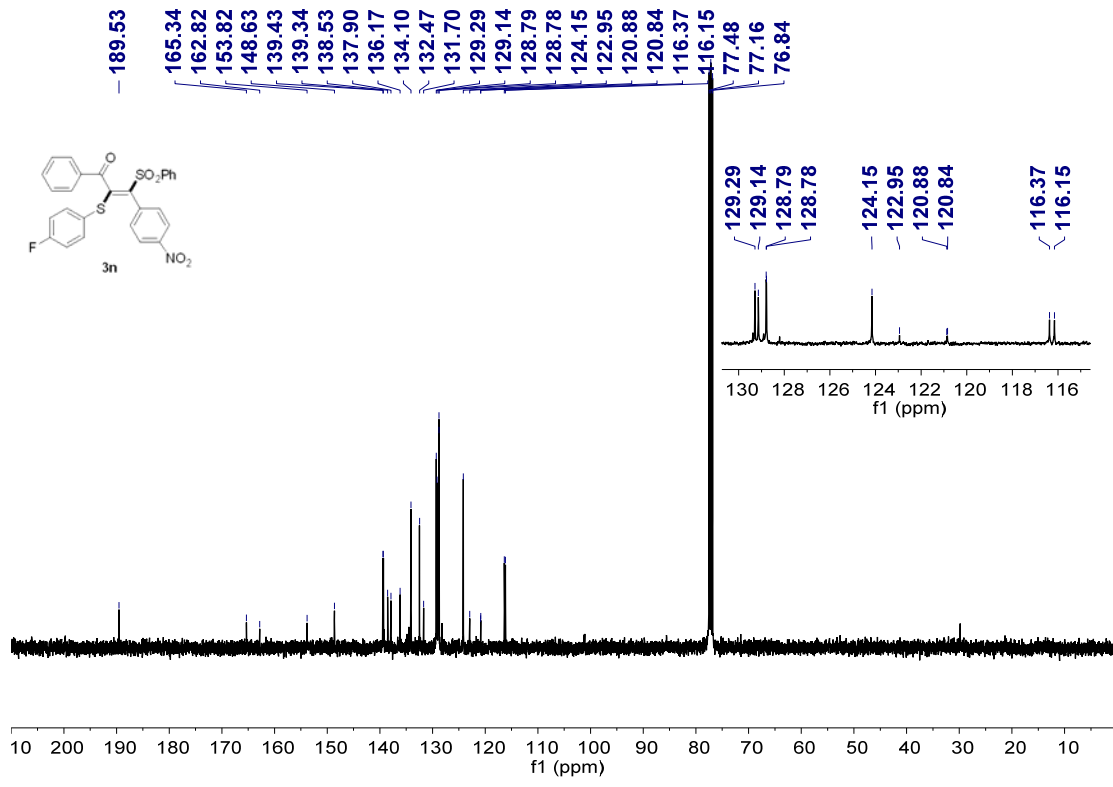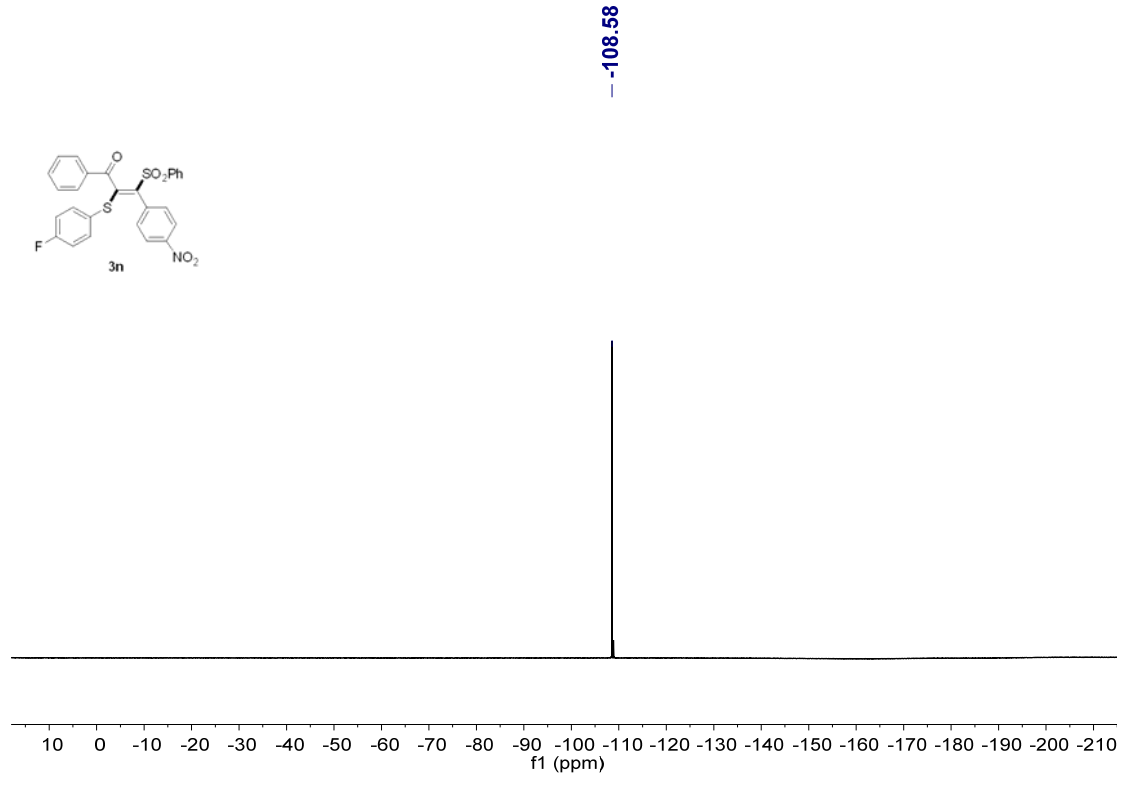

30

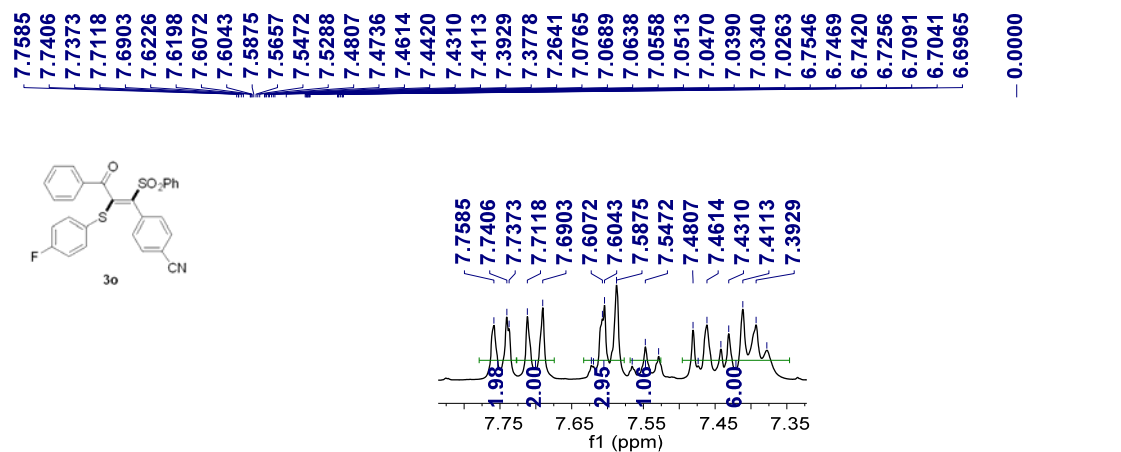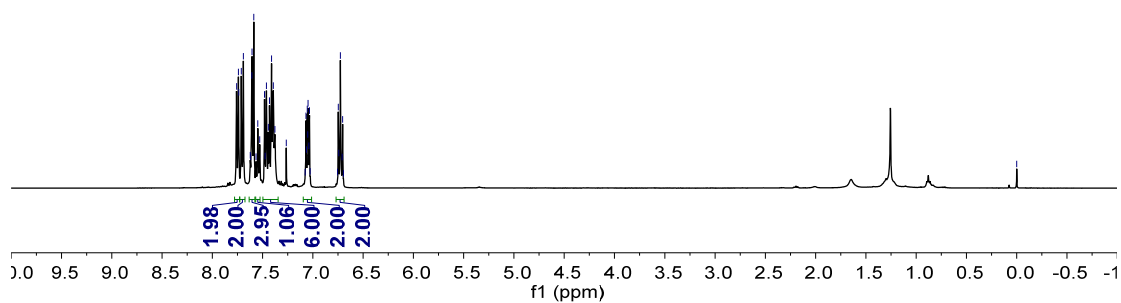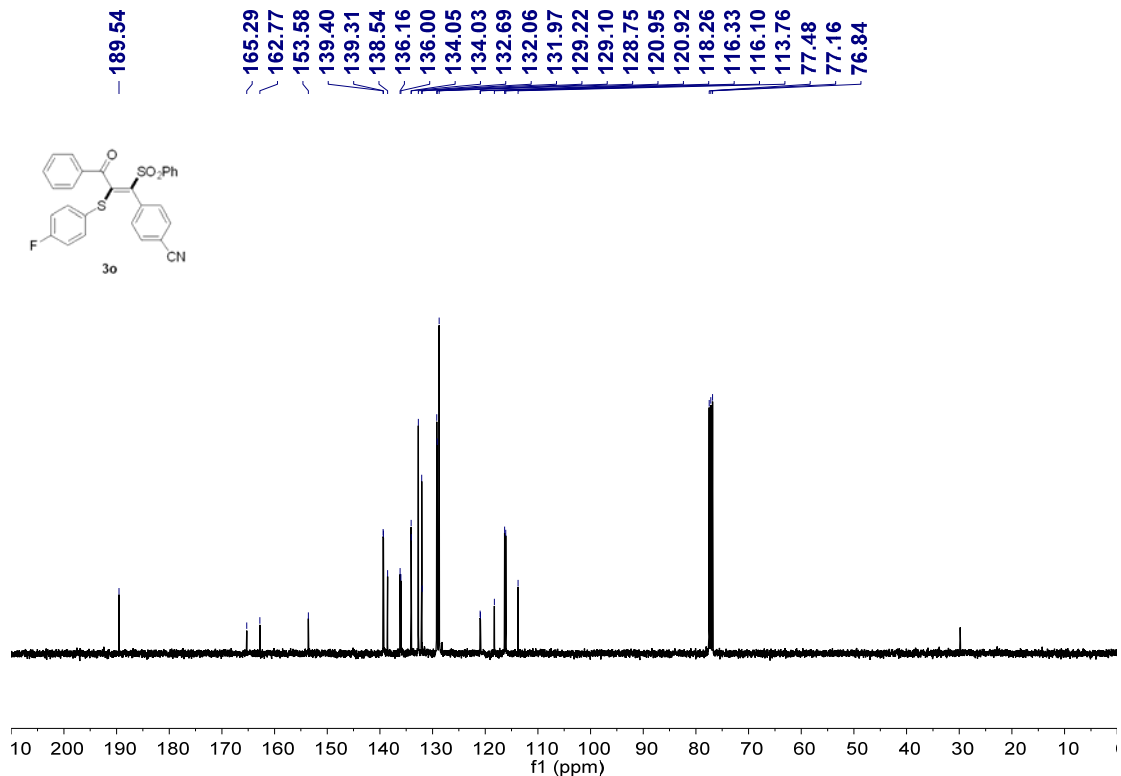

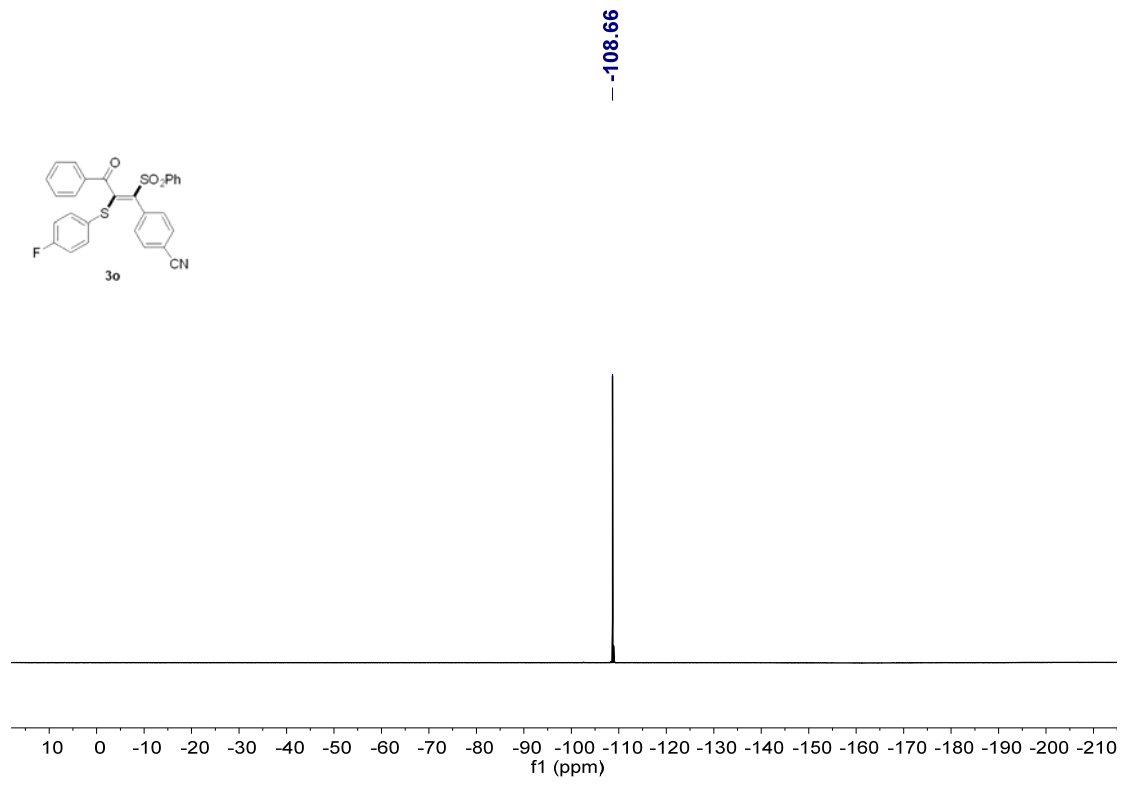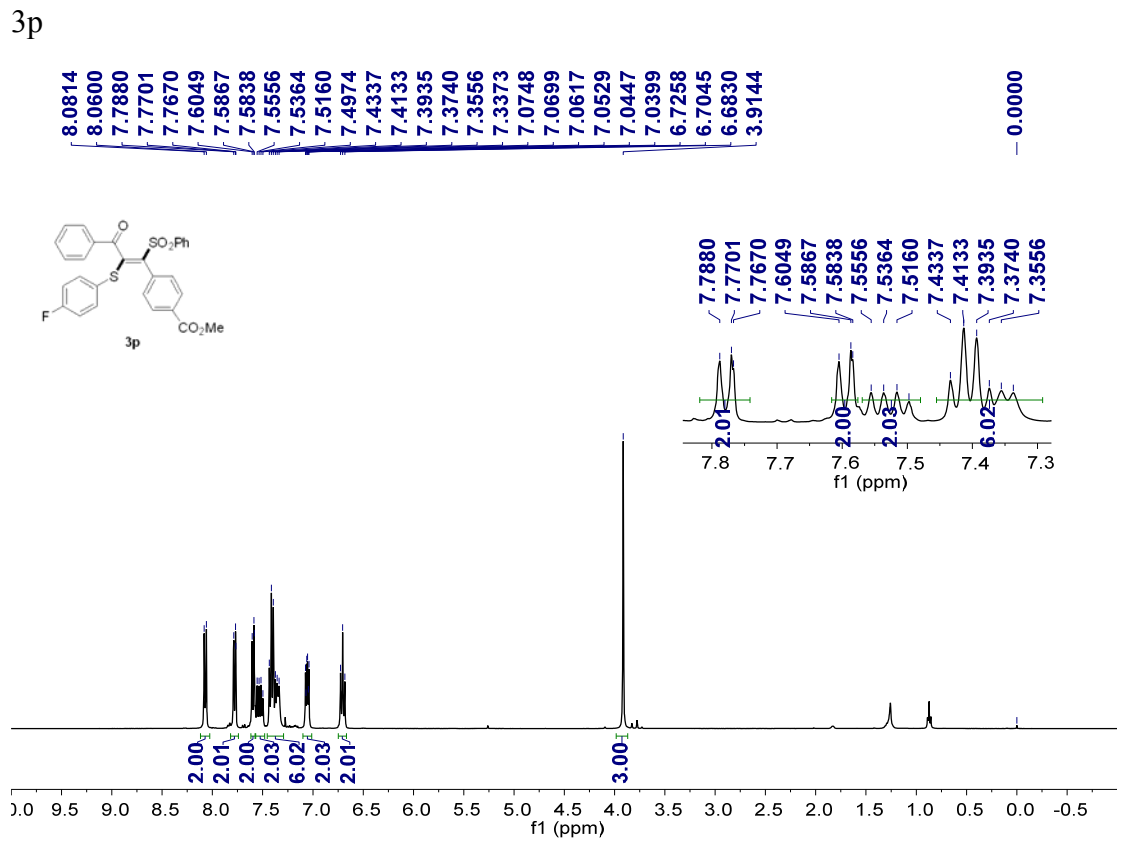

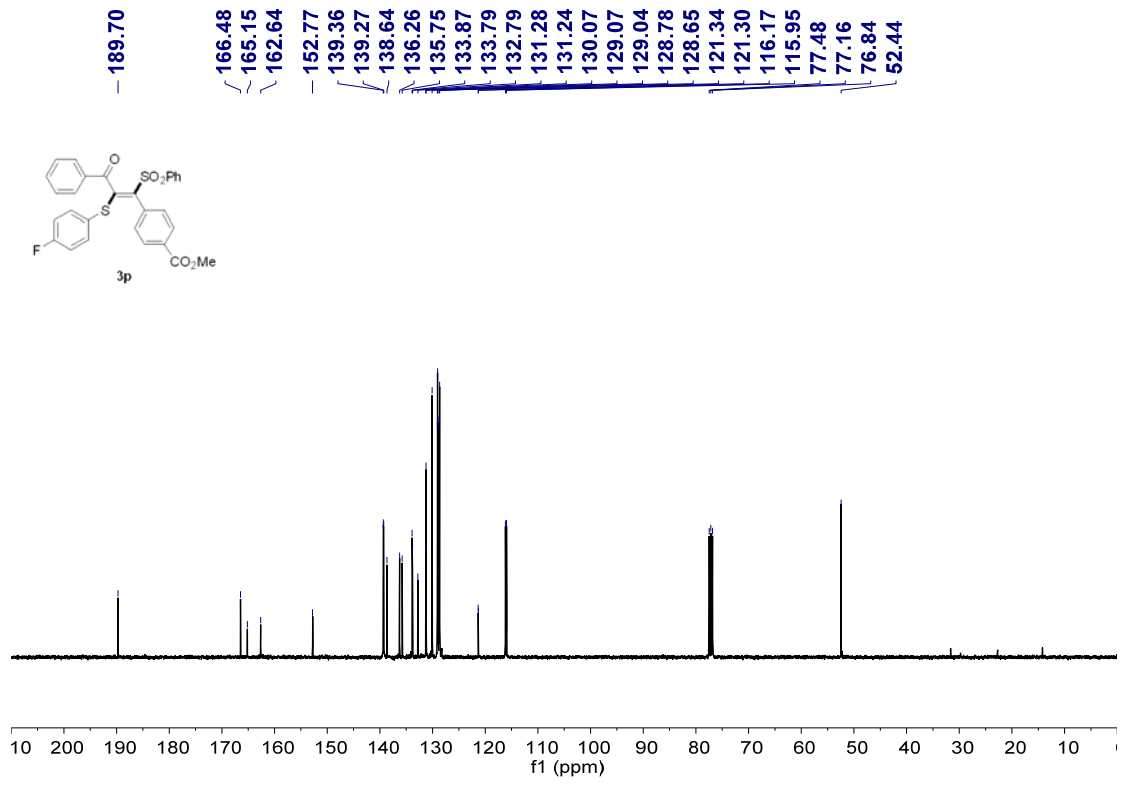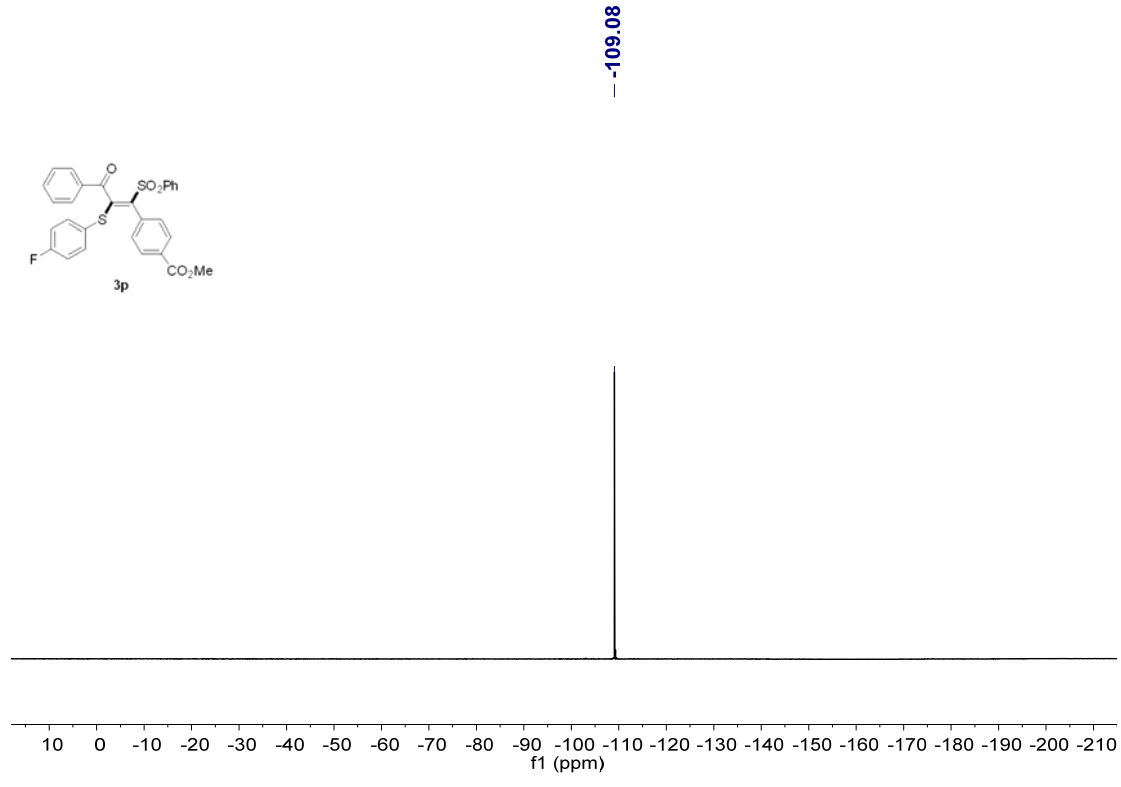

3q

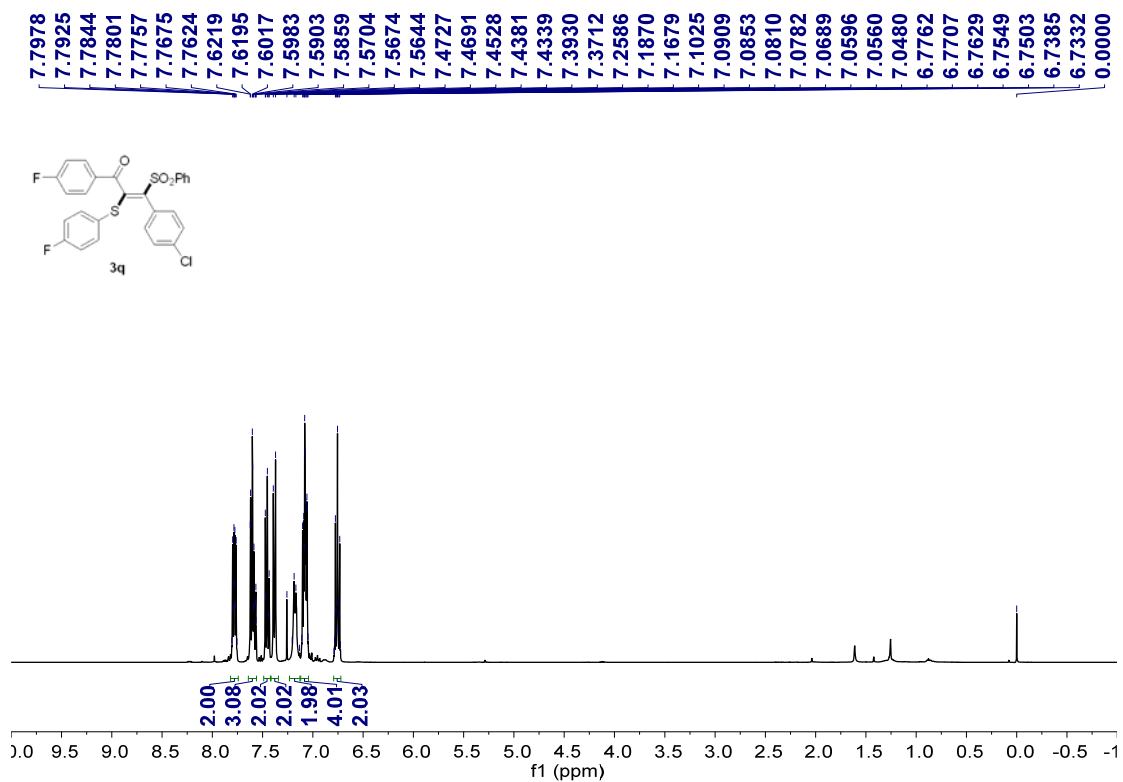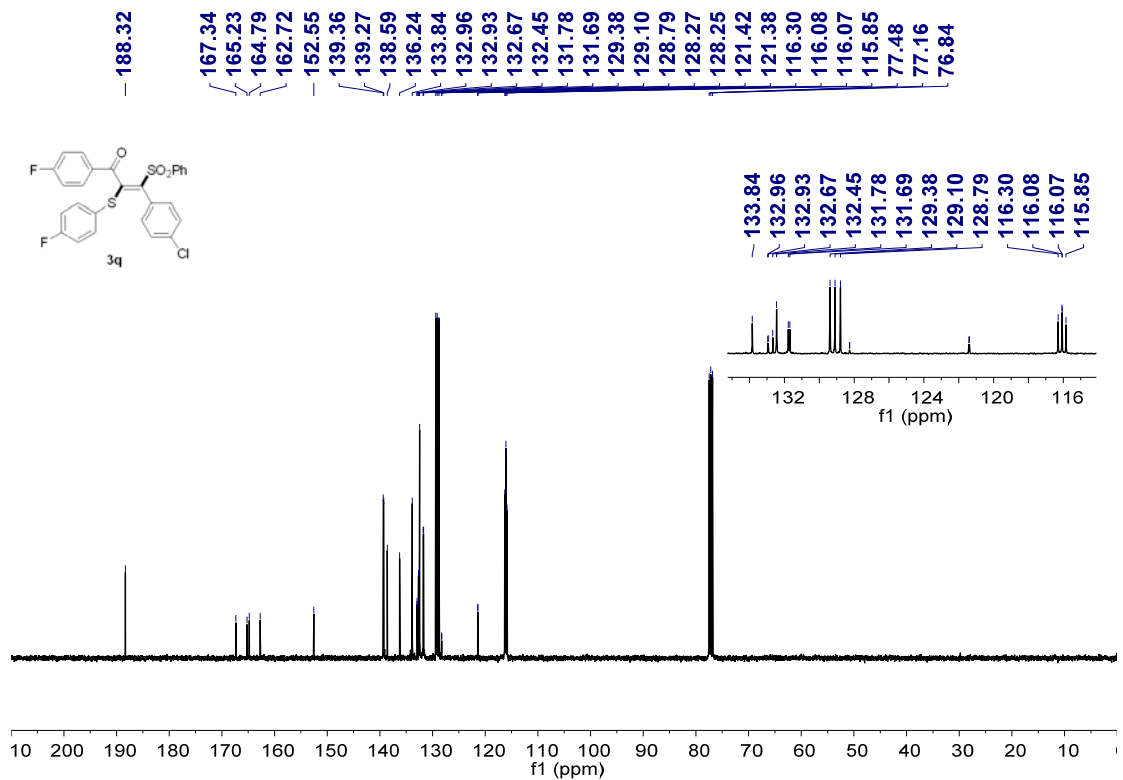

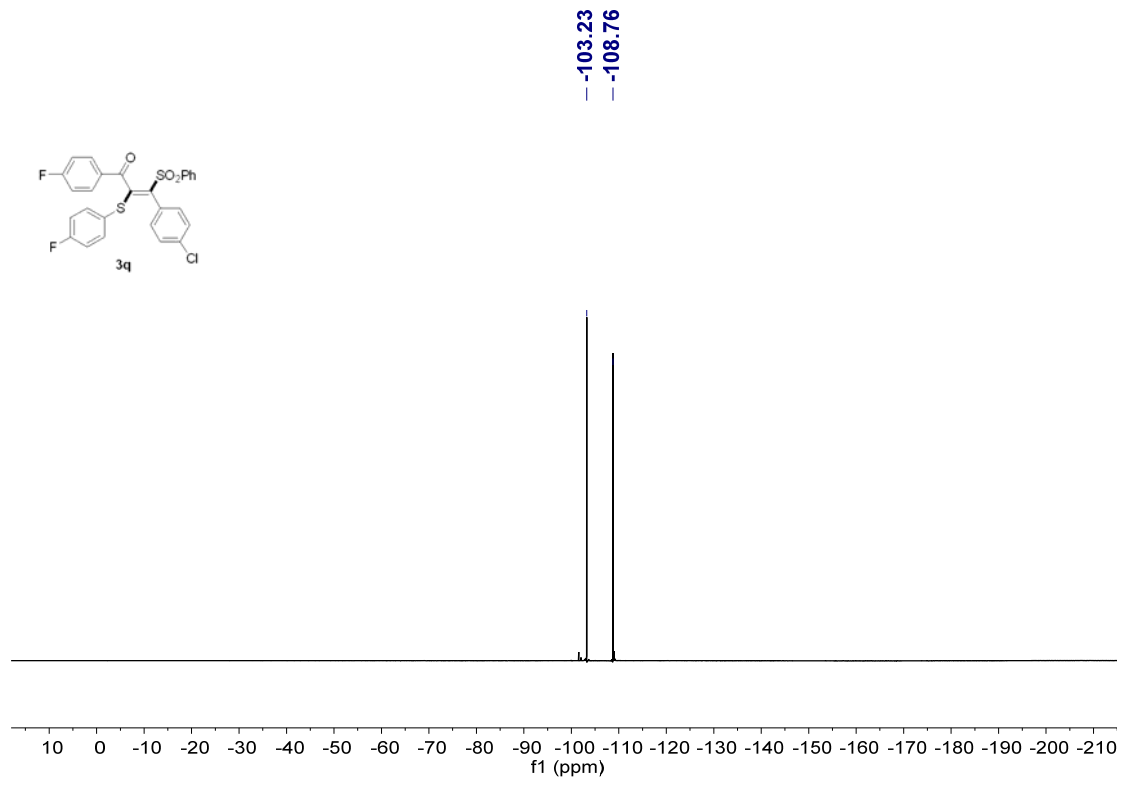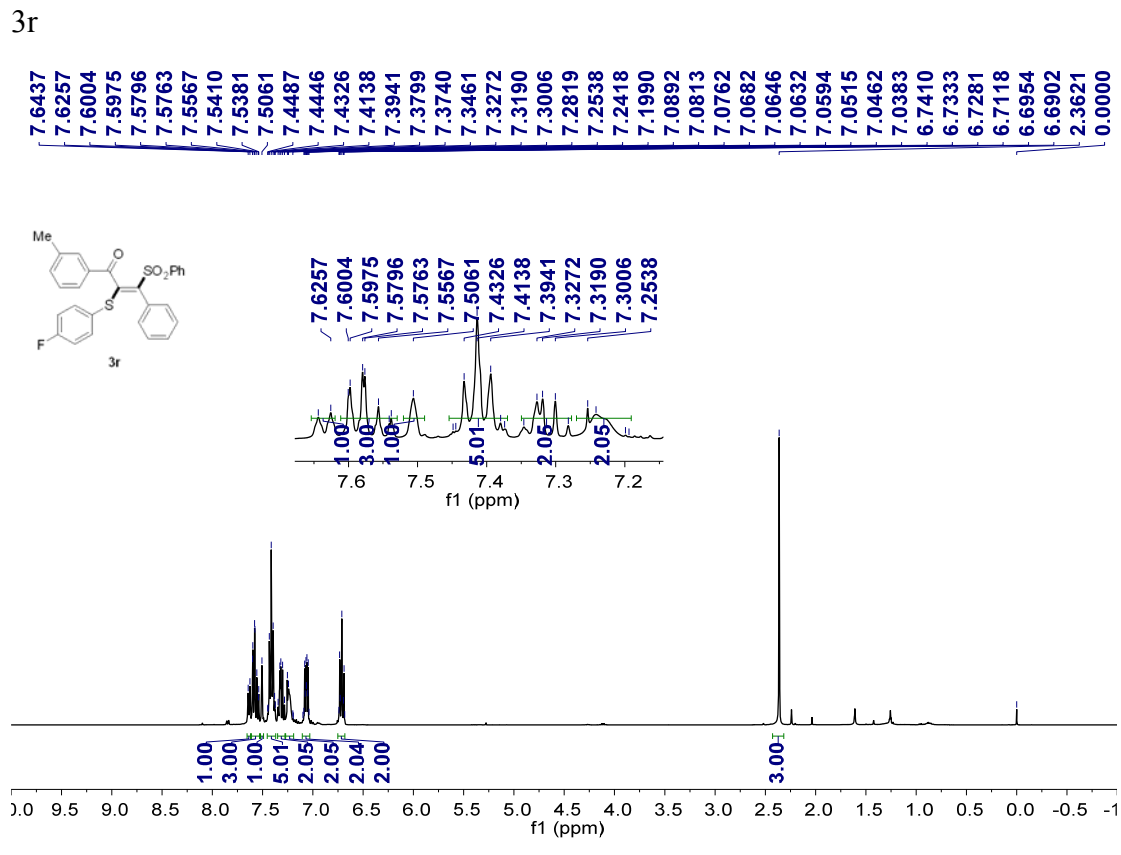



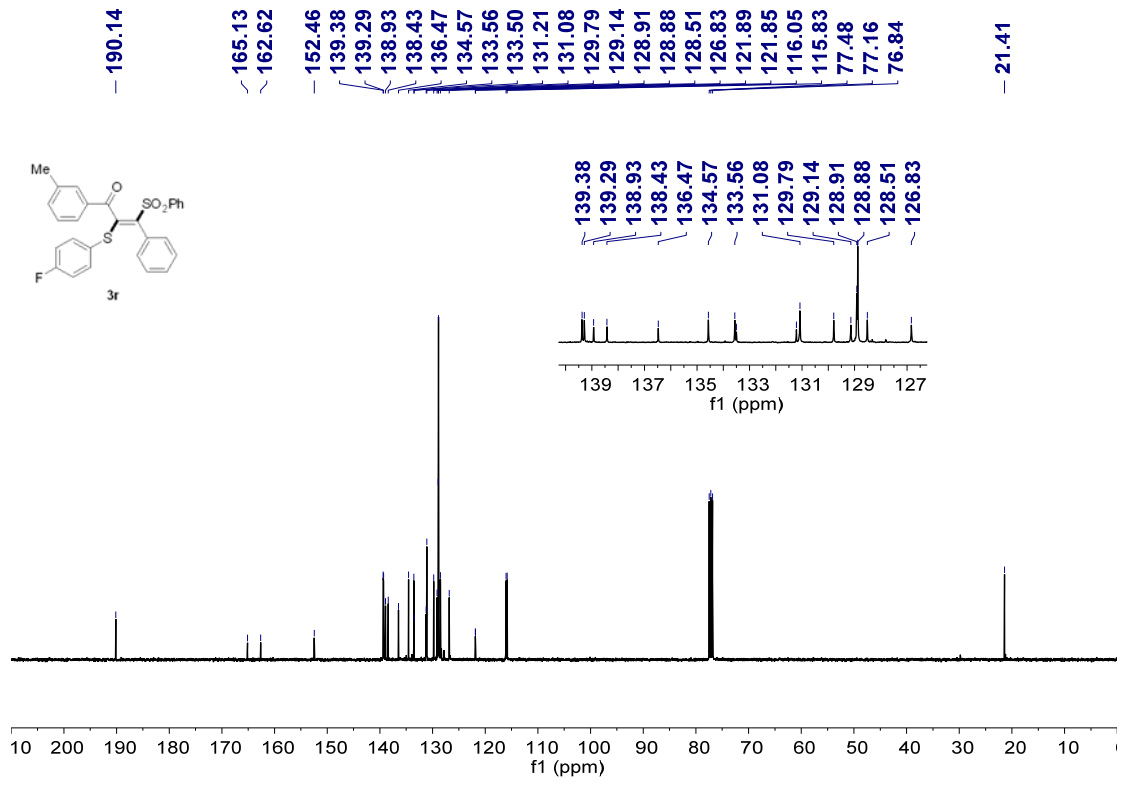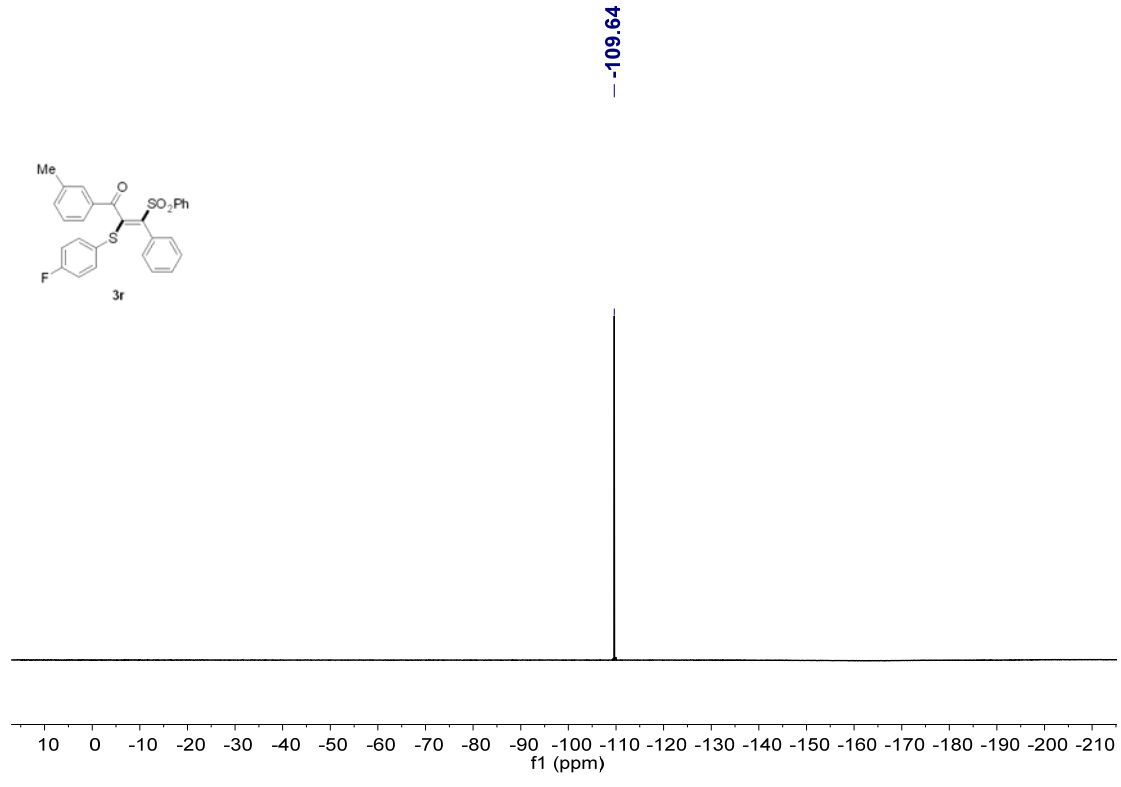

3s

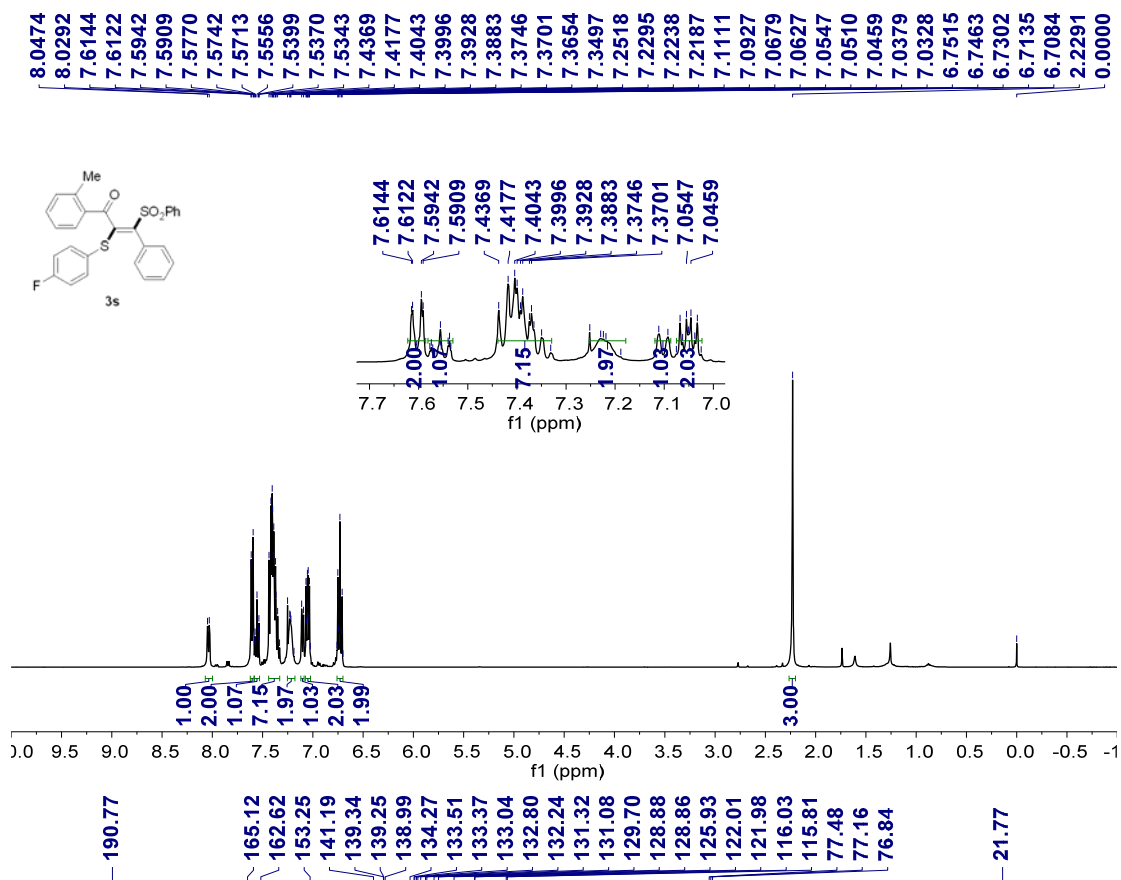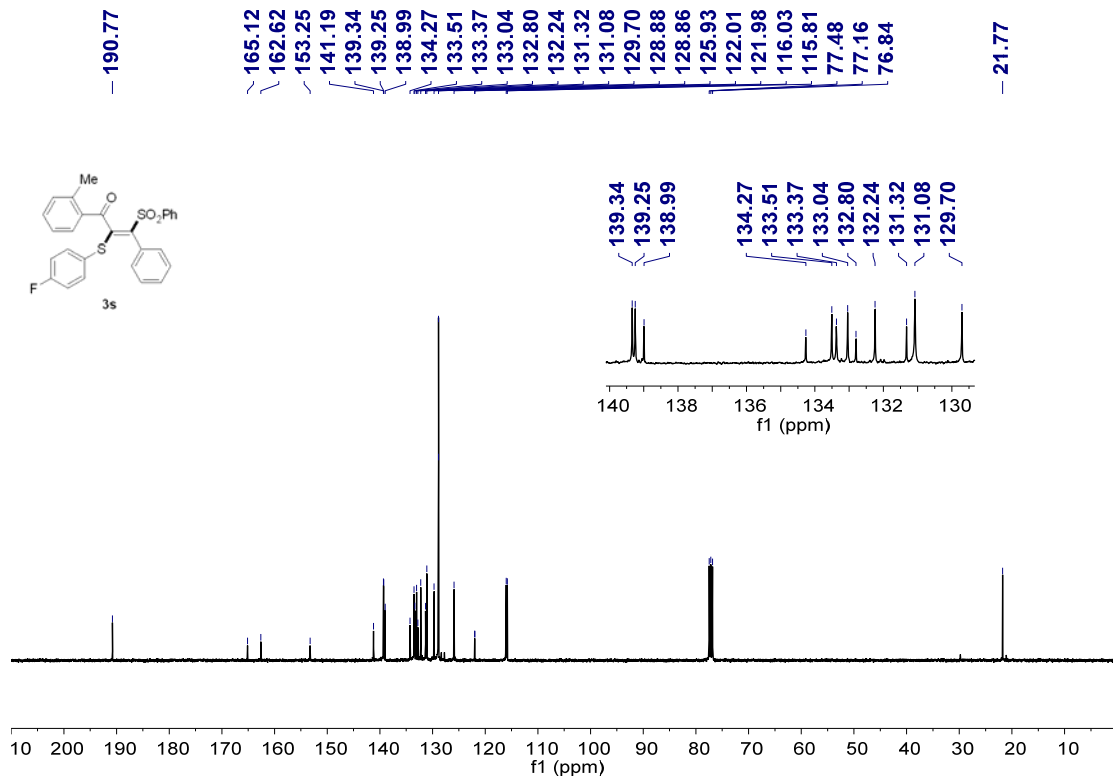

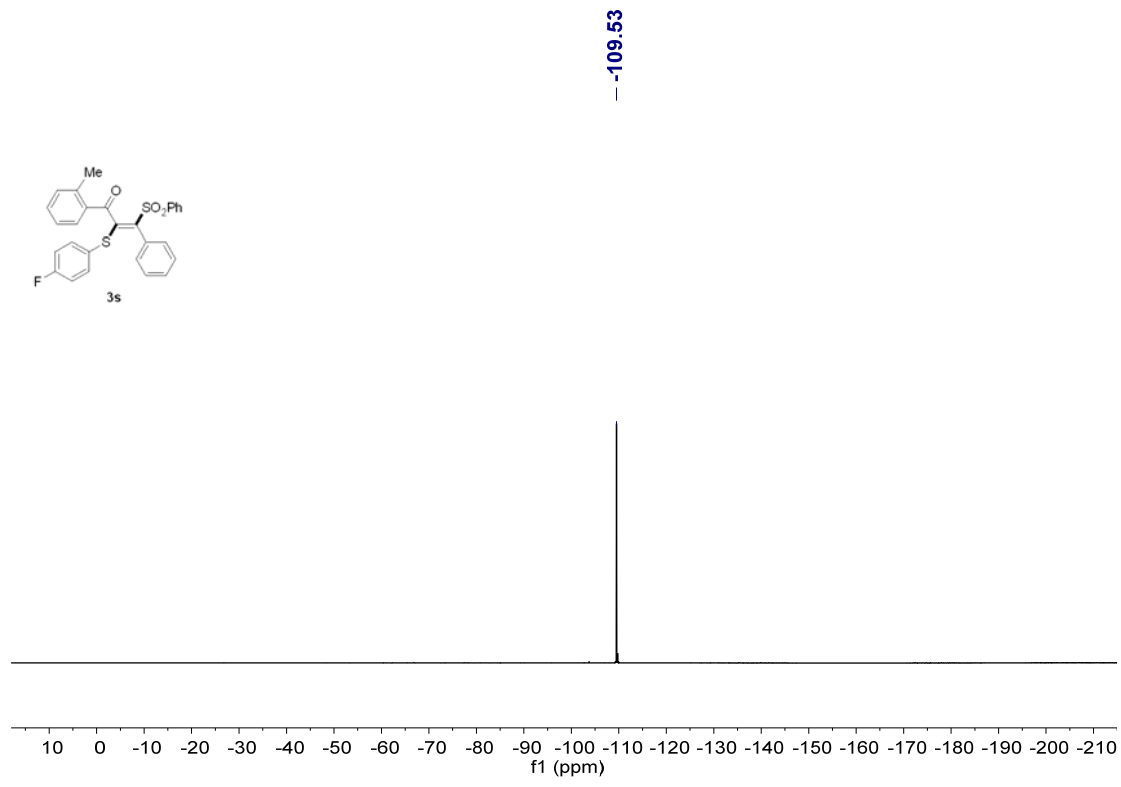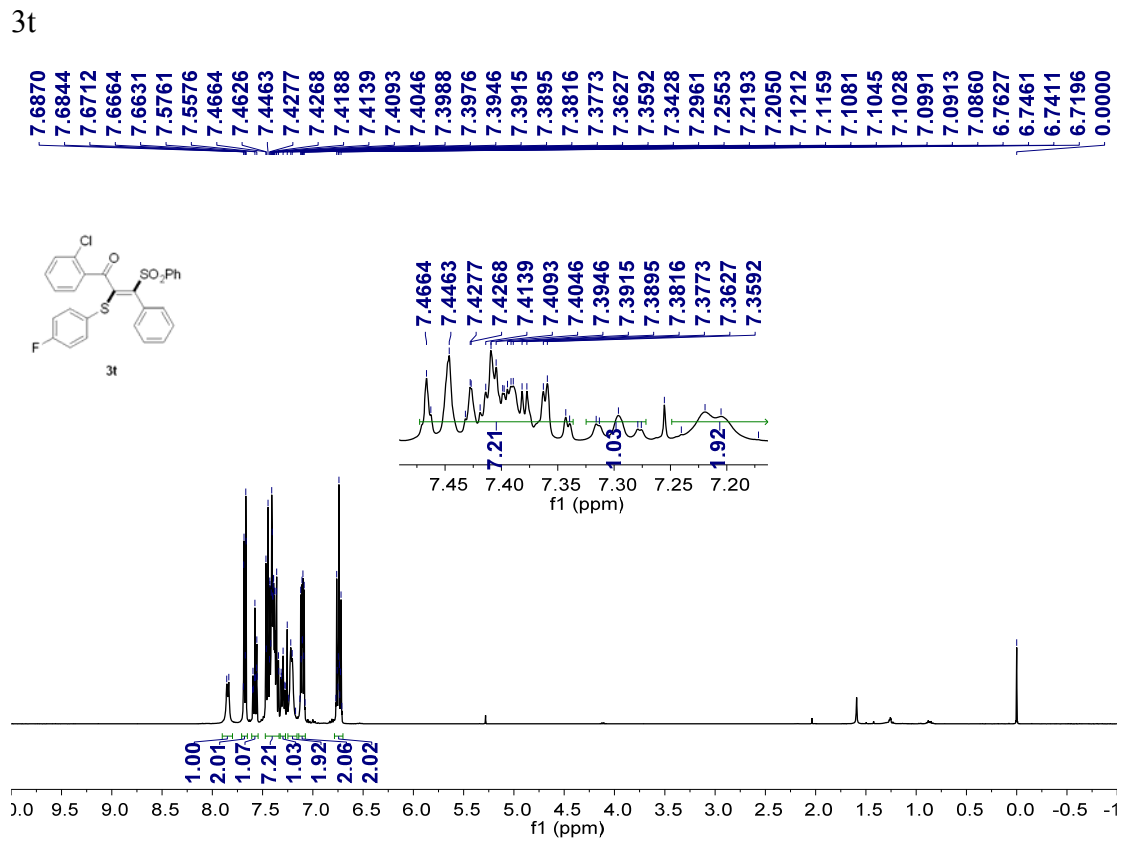

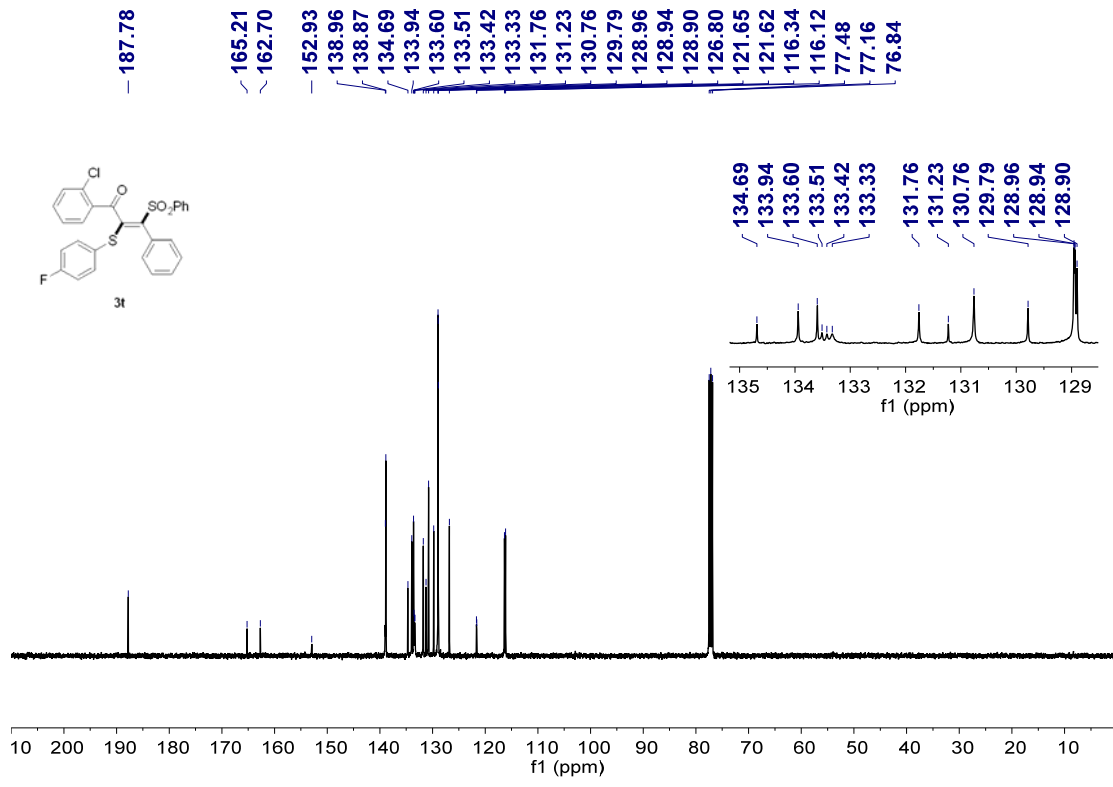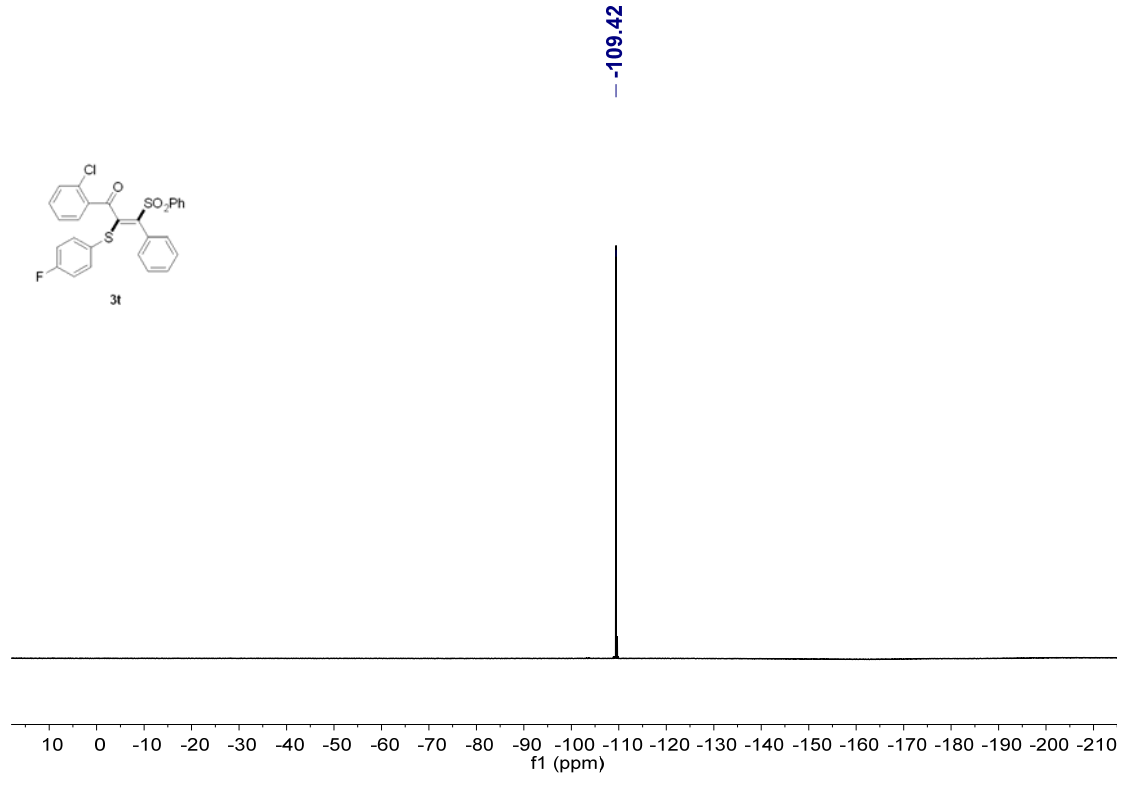

3u

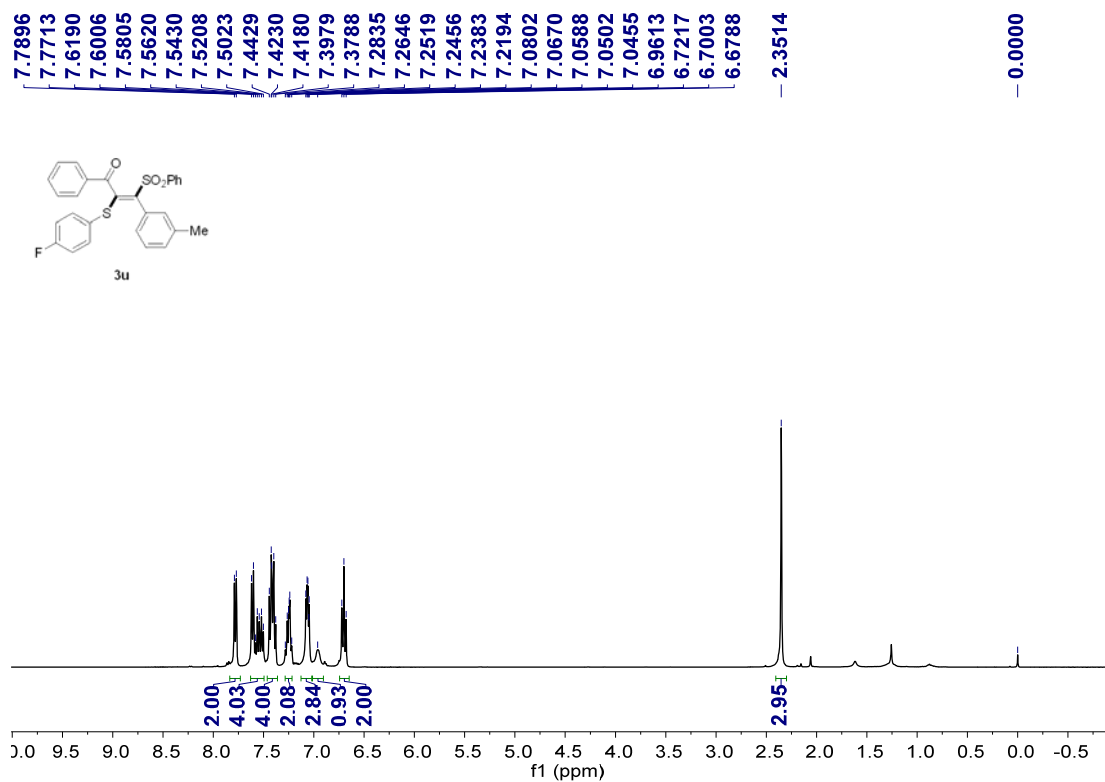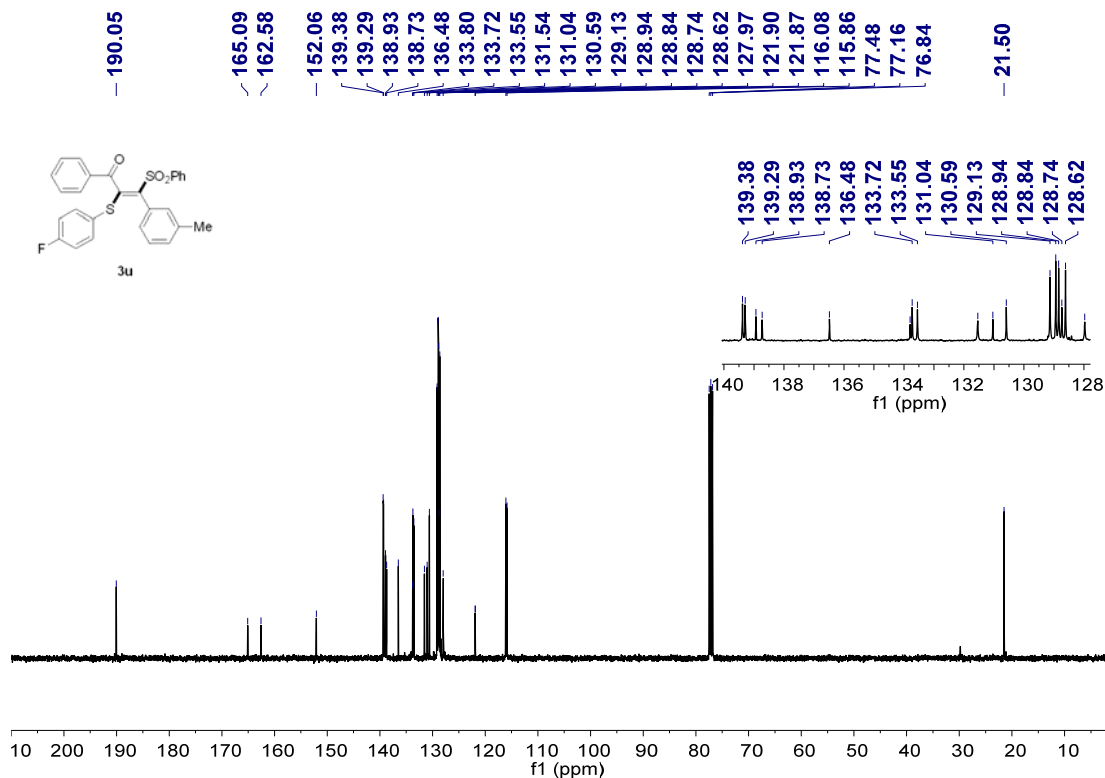

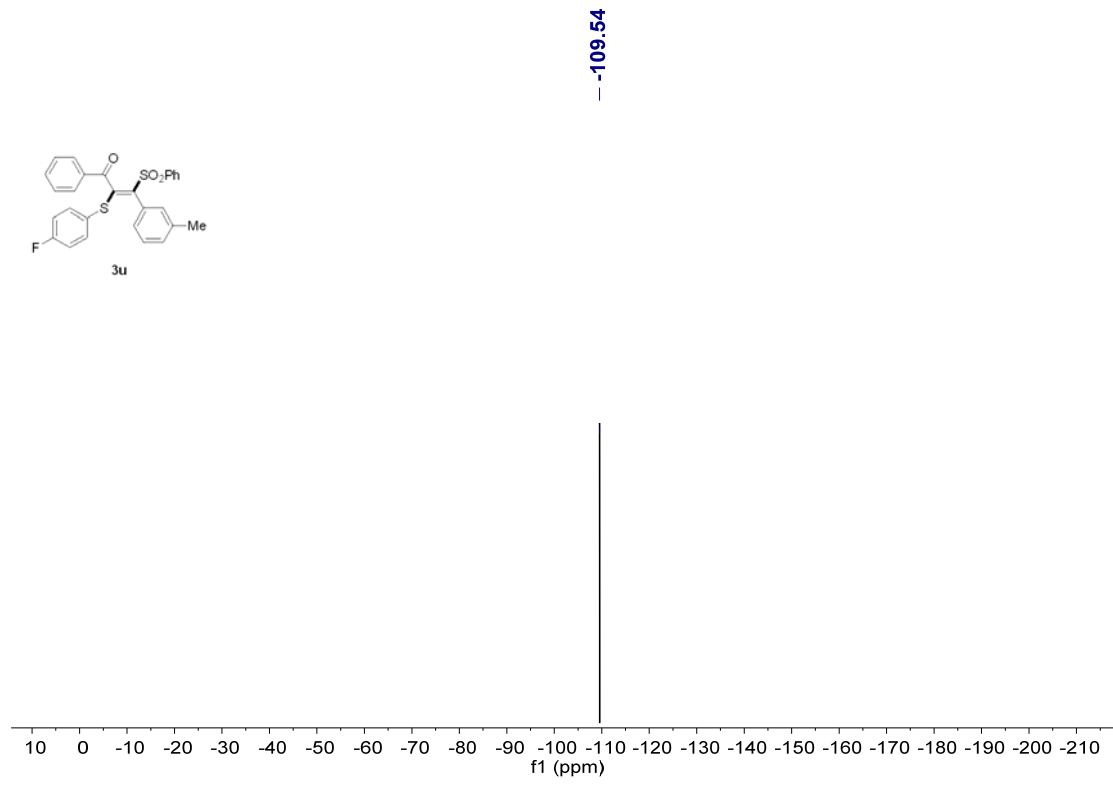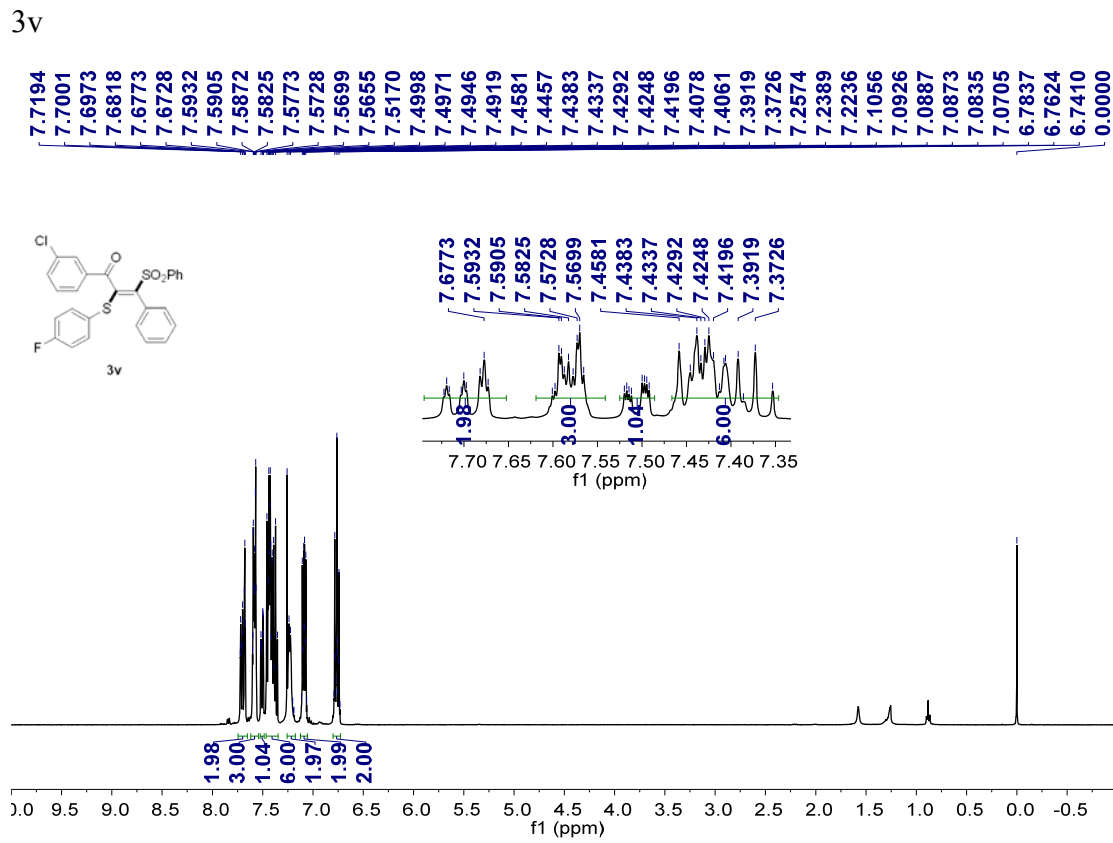

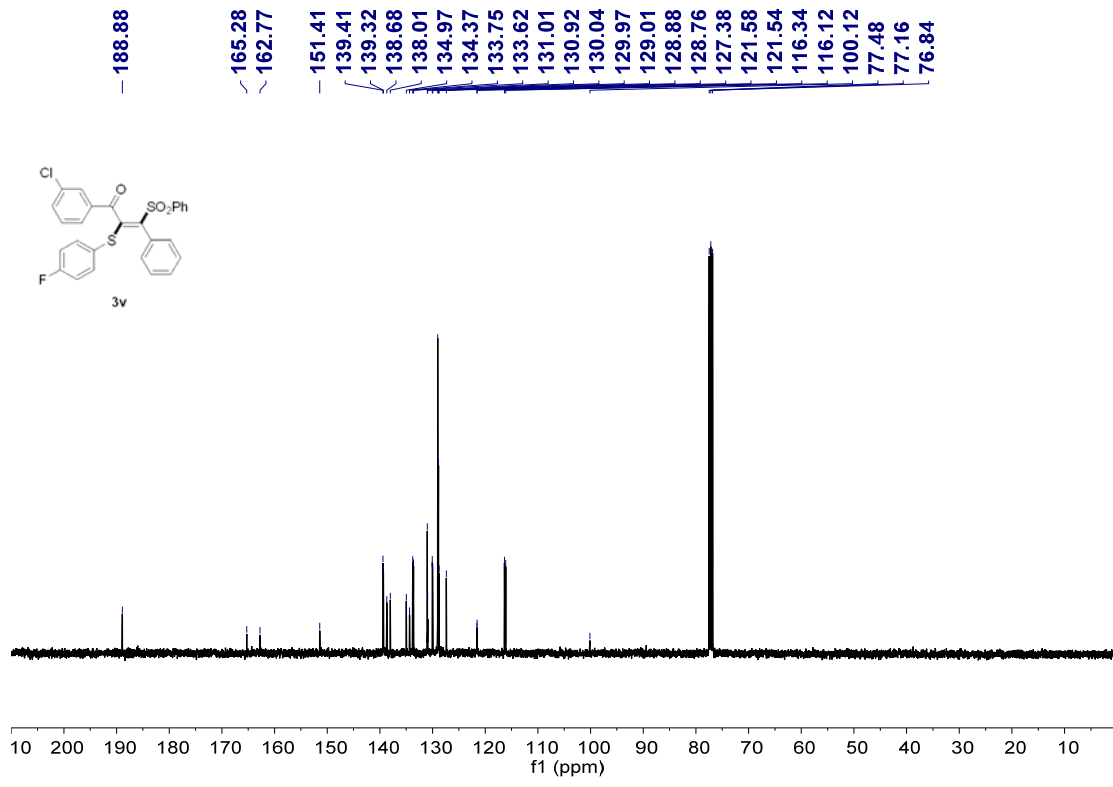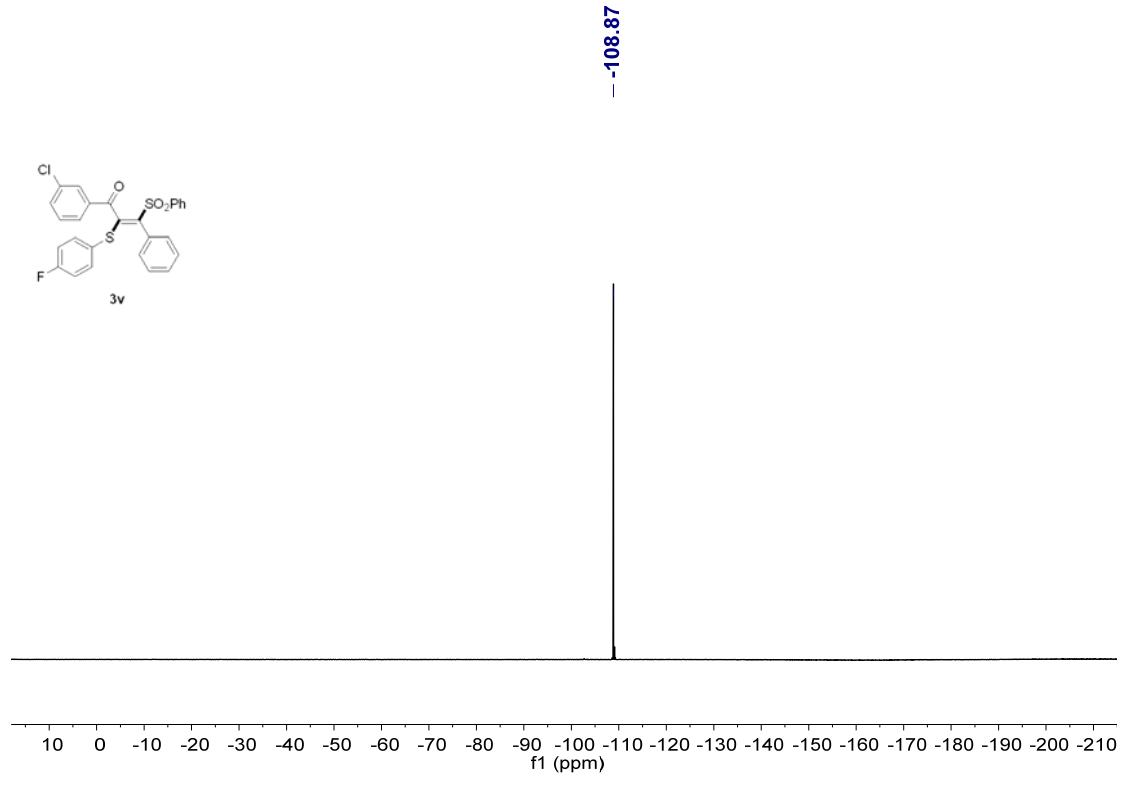

3w

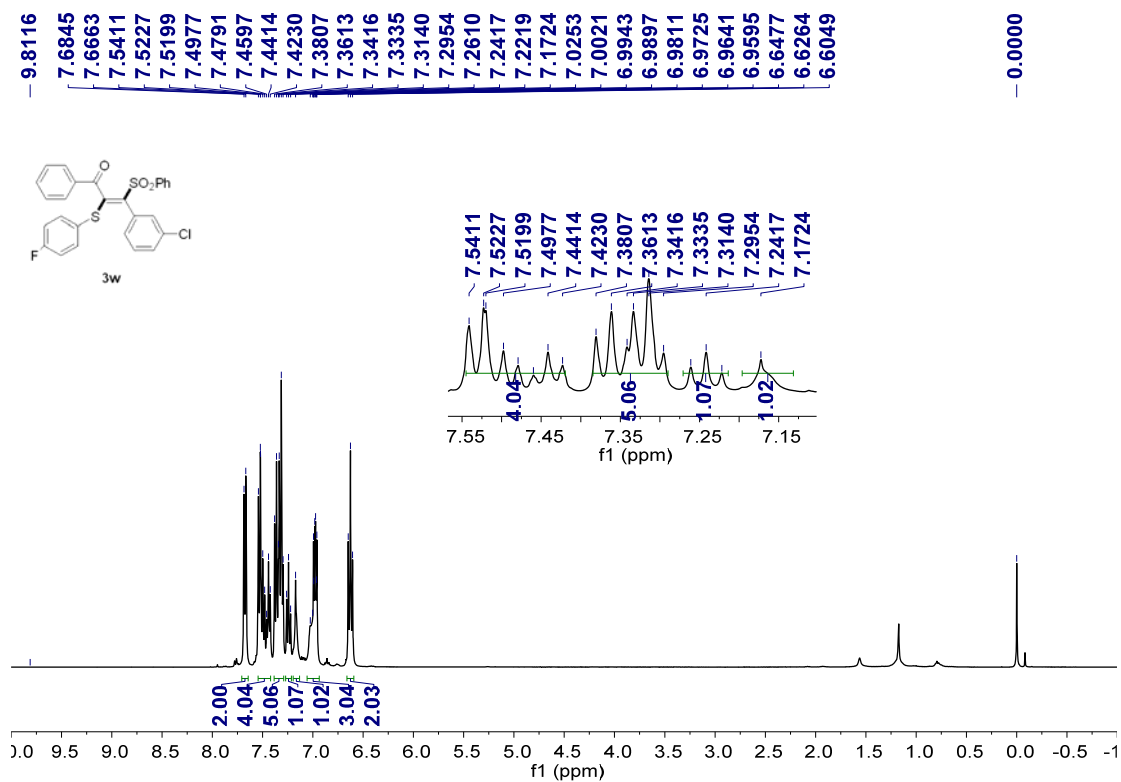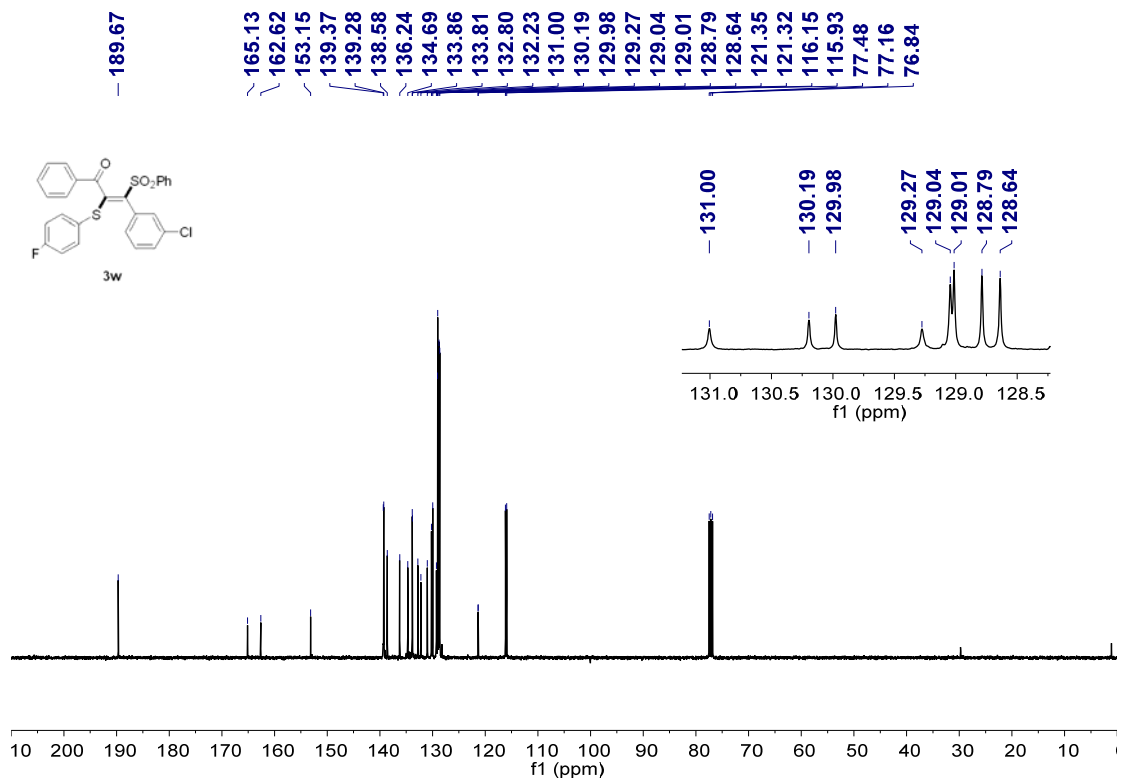



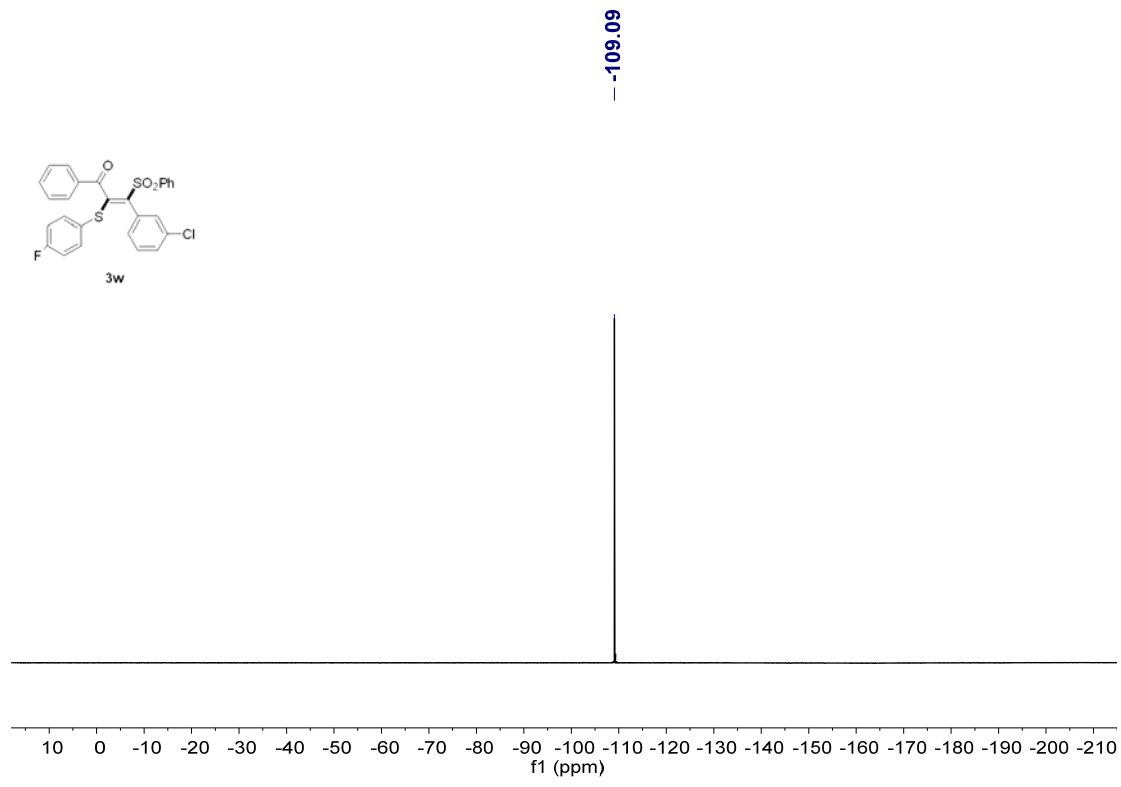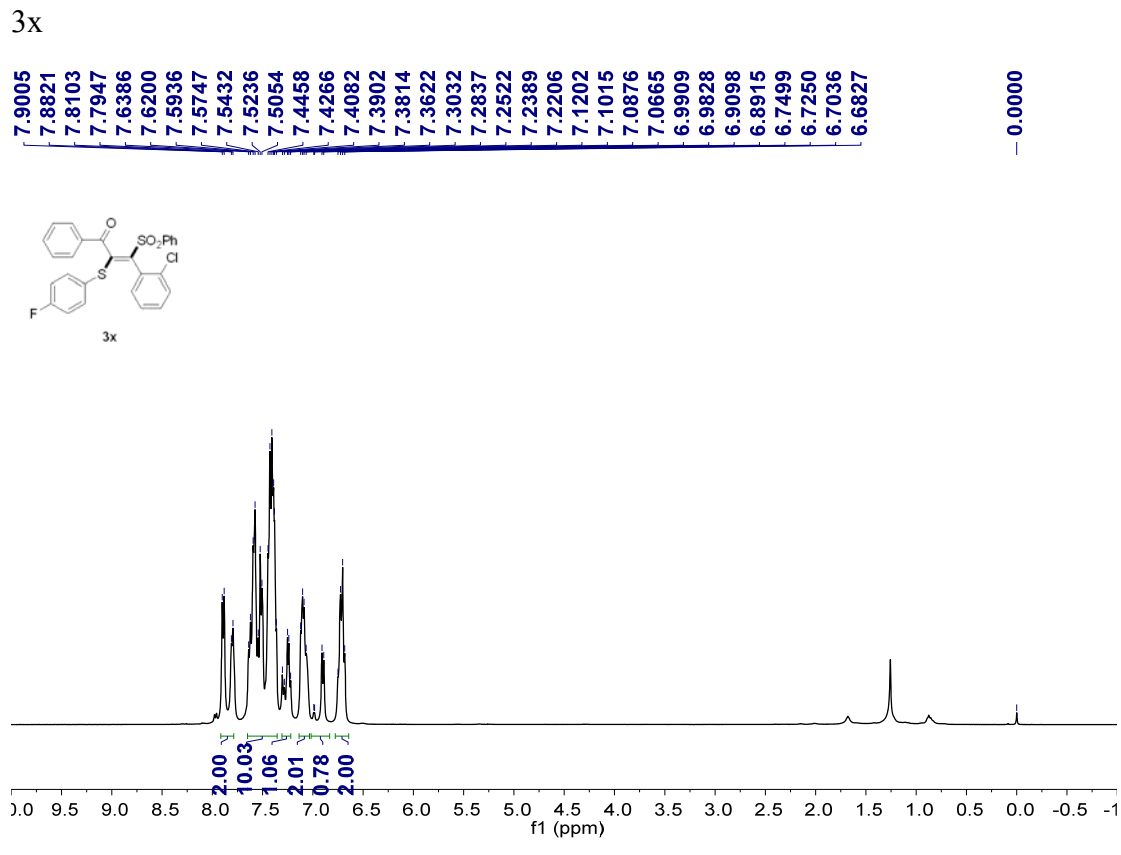

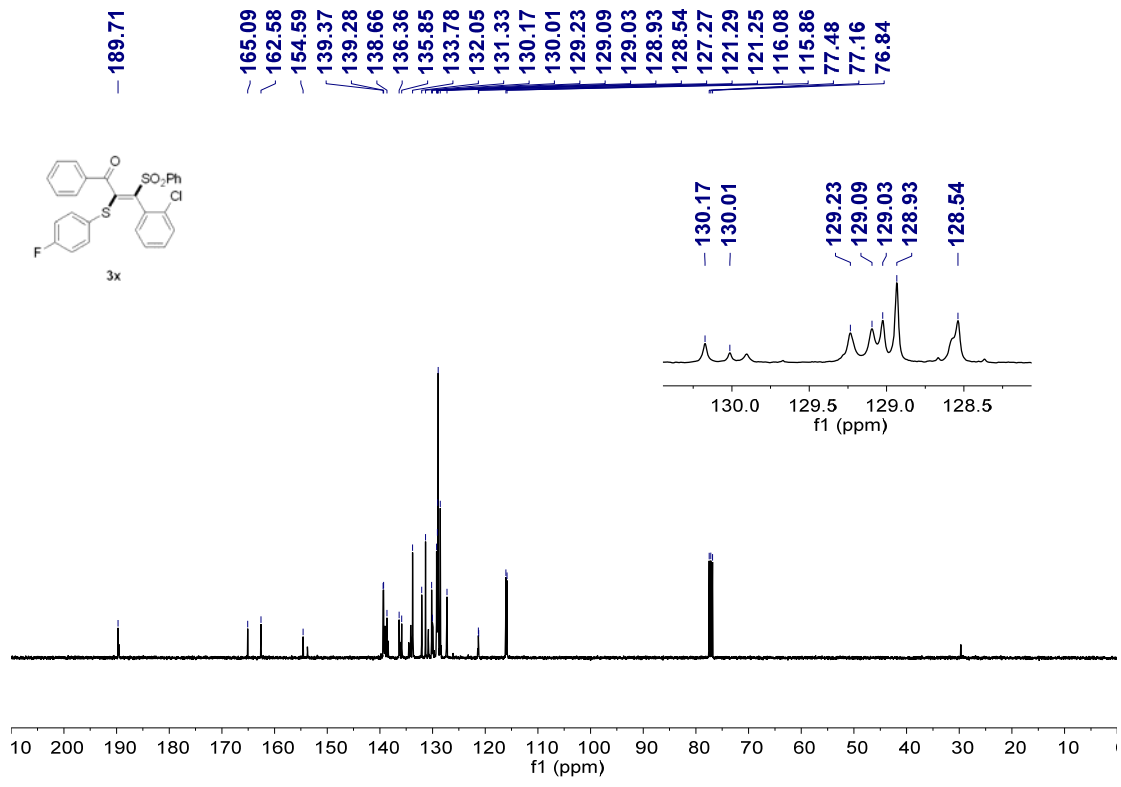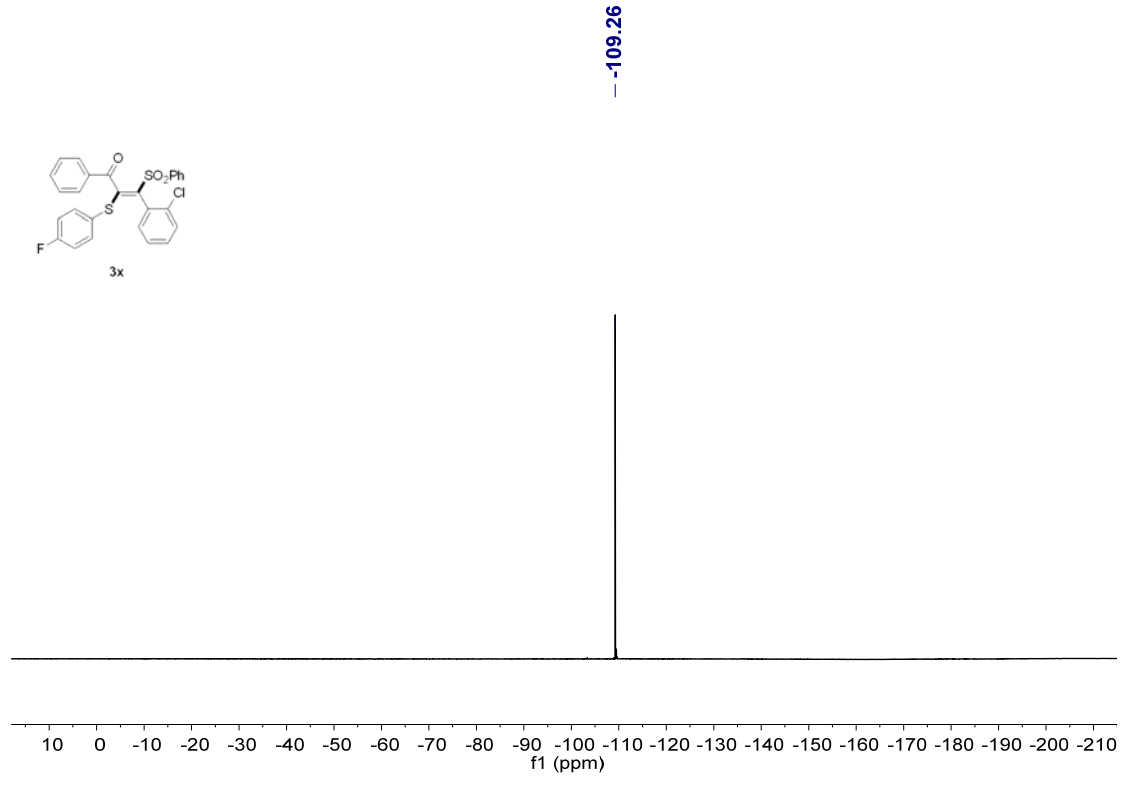

3y

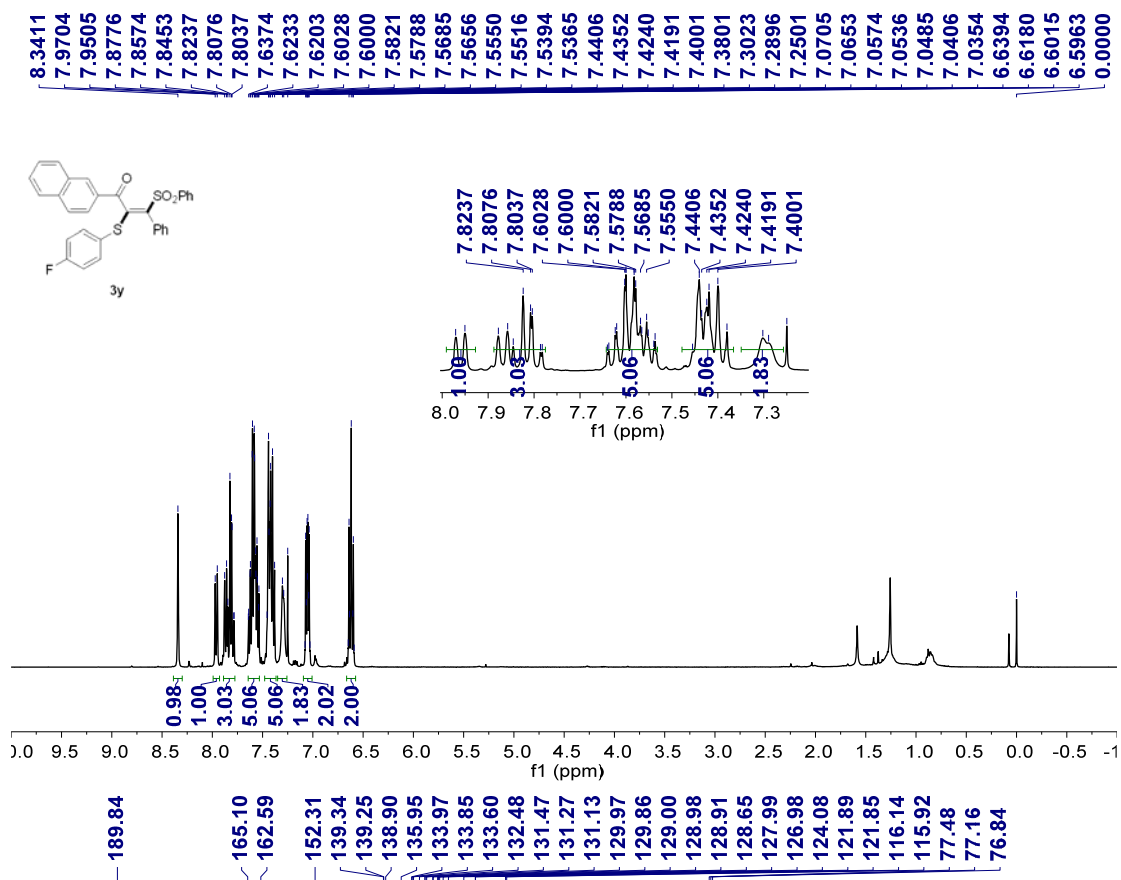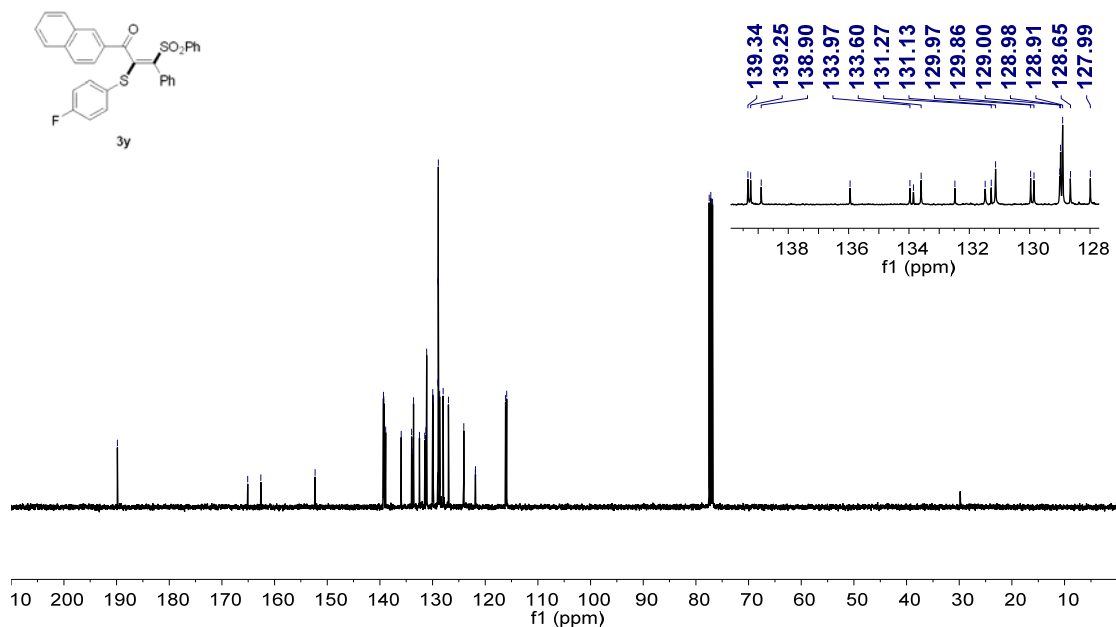

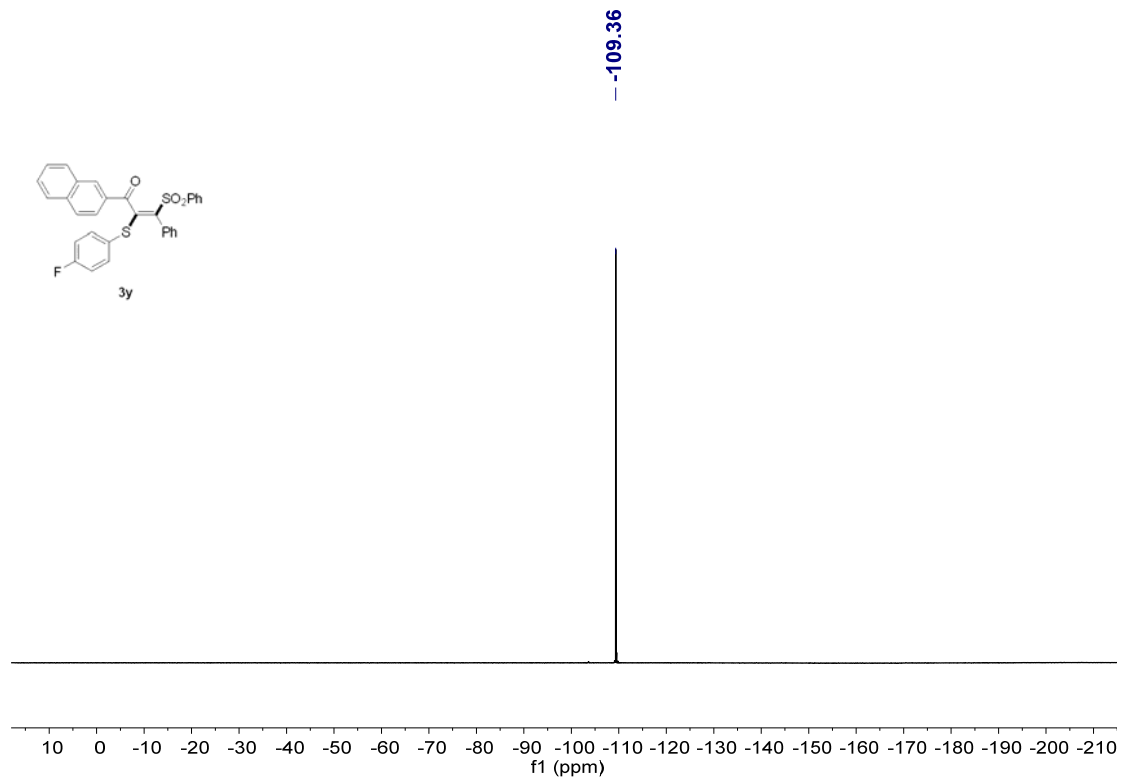

**3z**

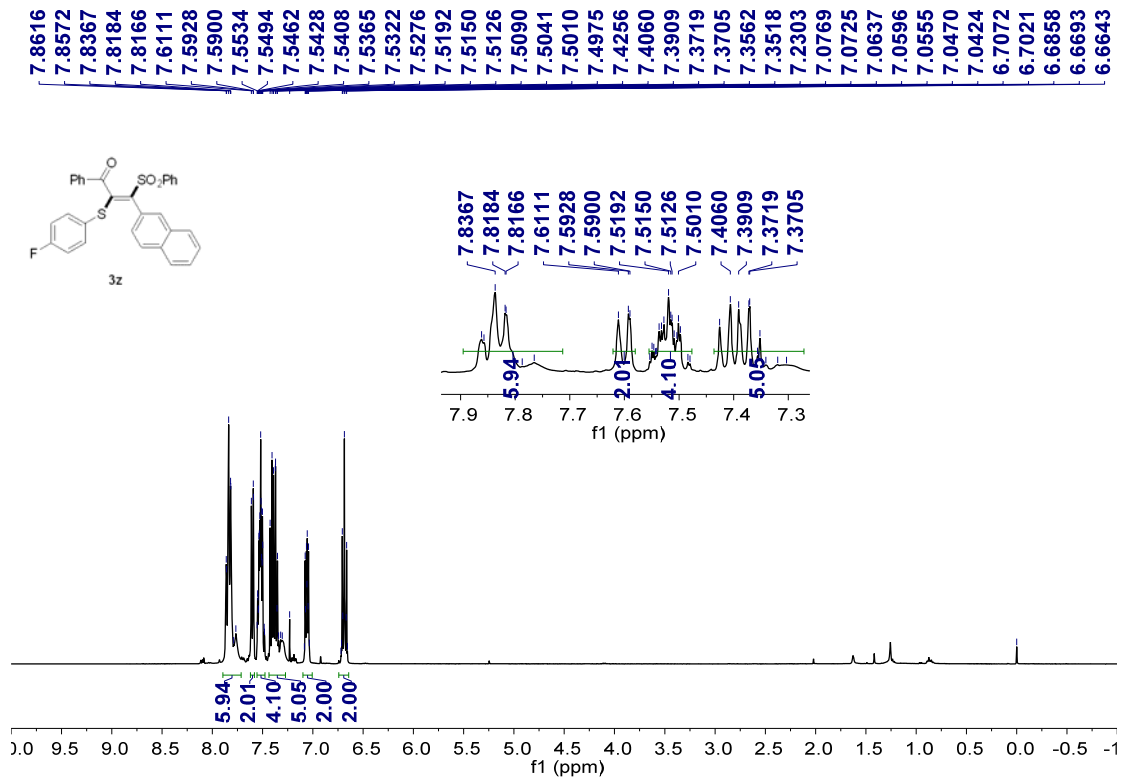

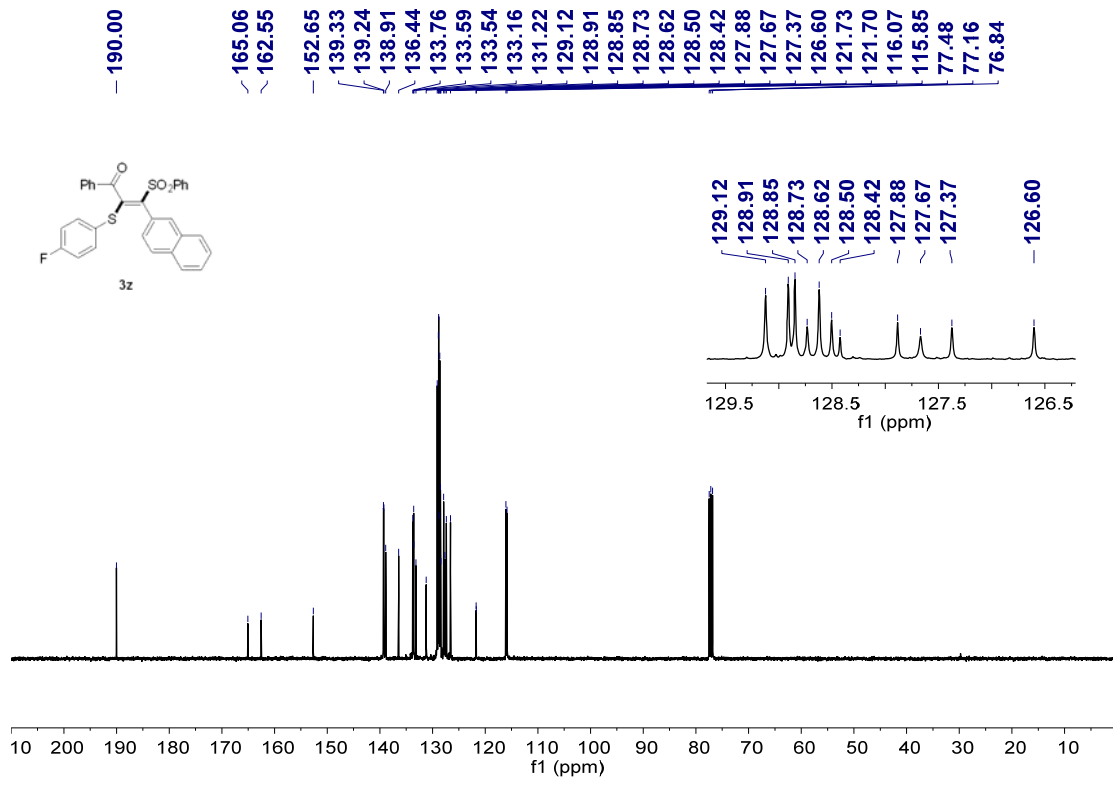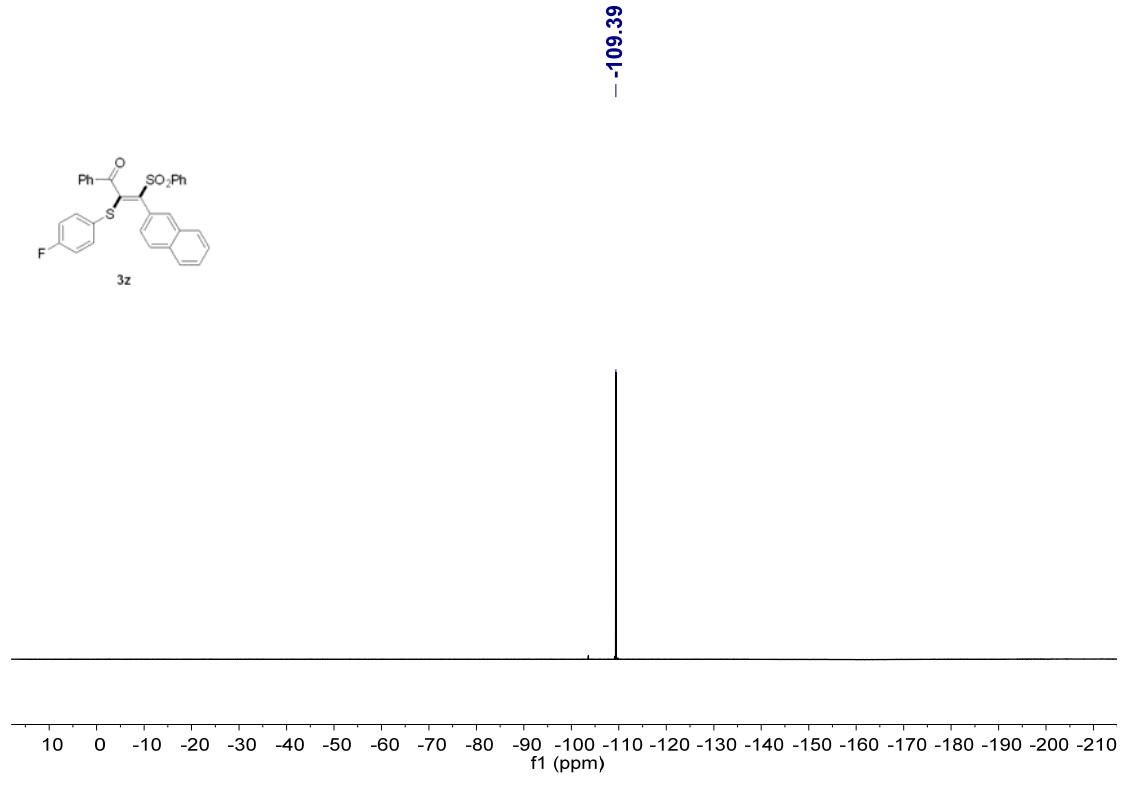

3aa

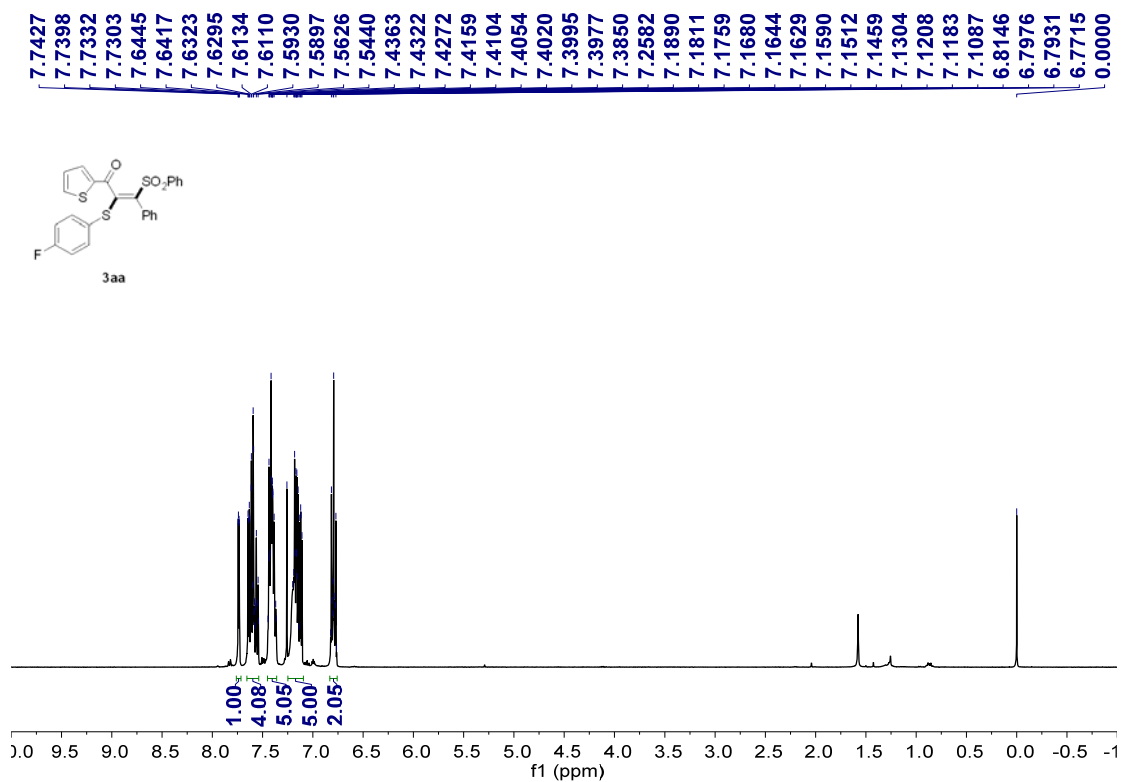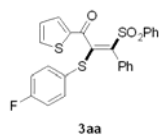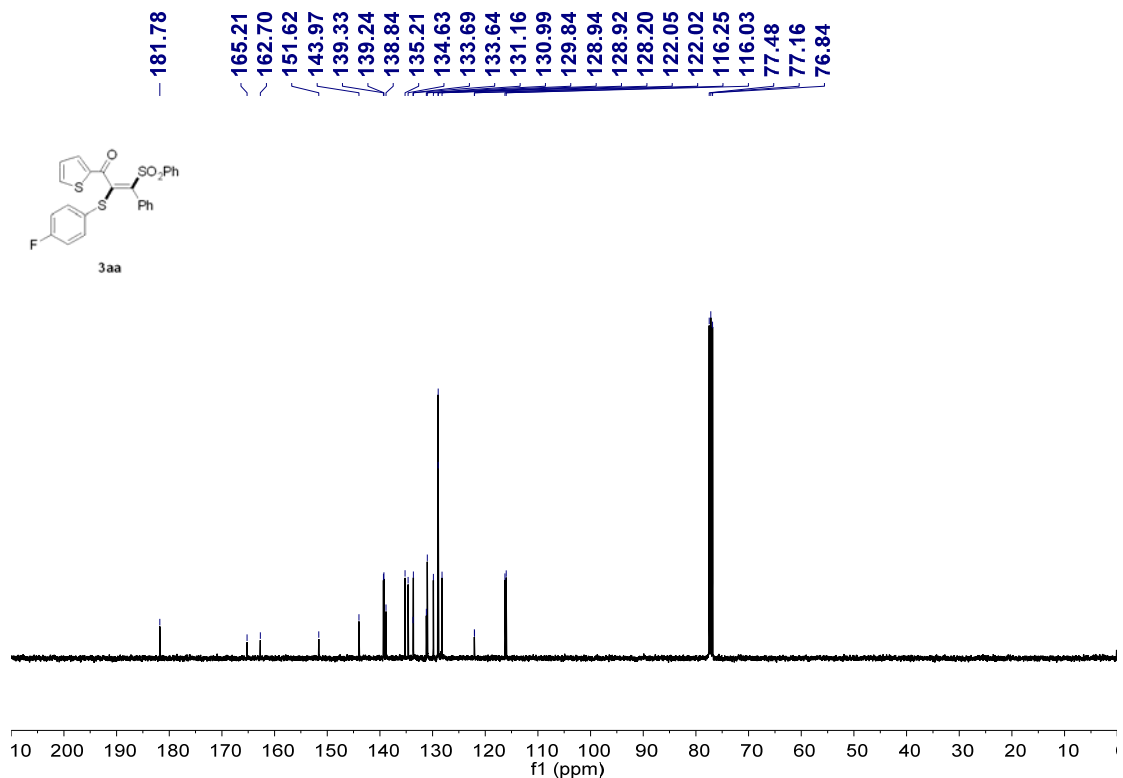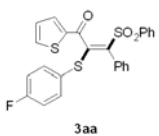

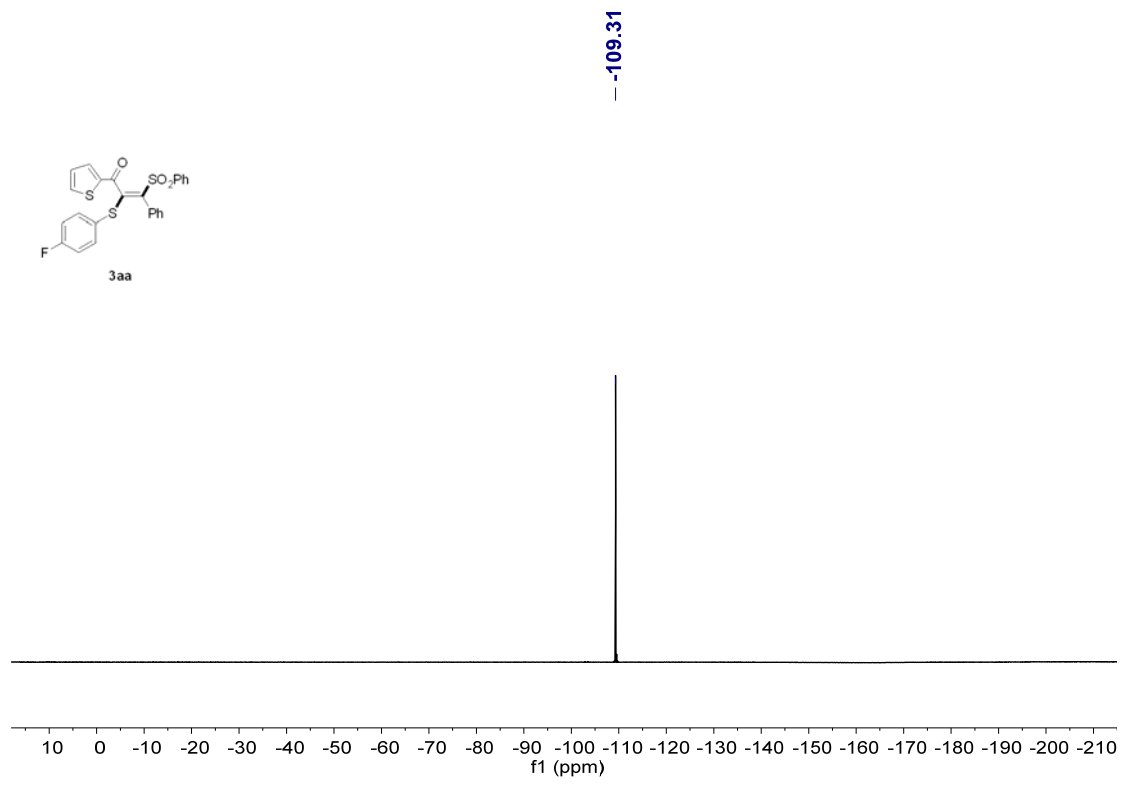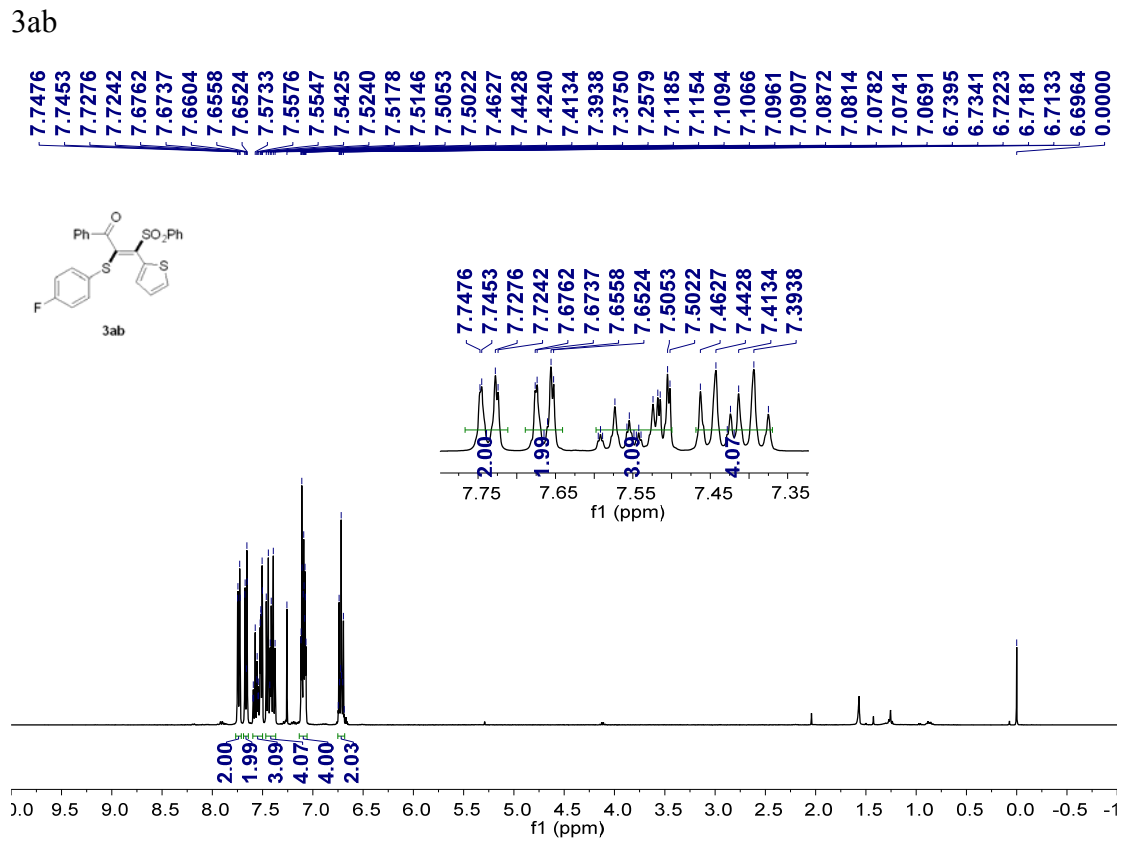

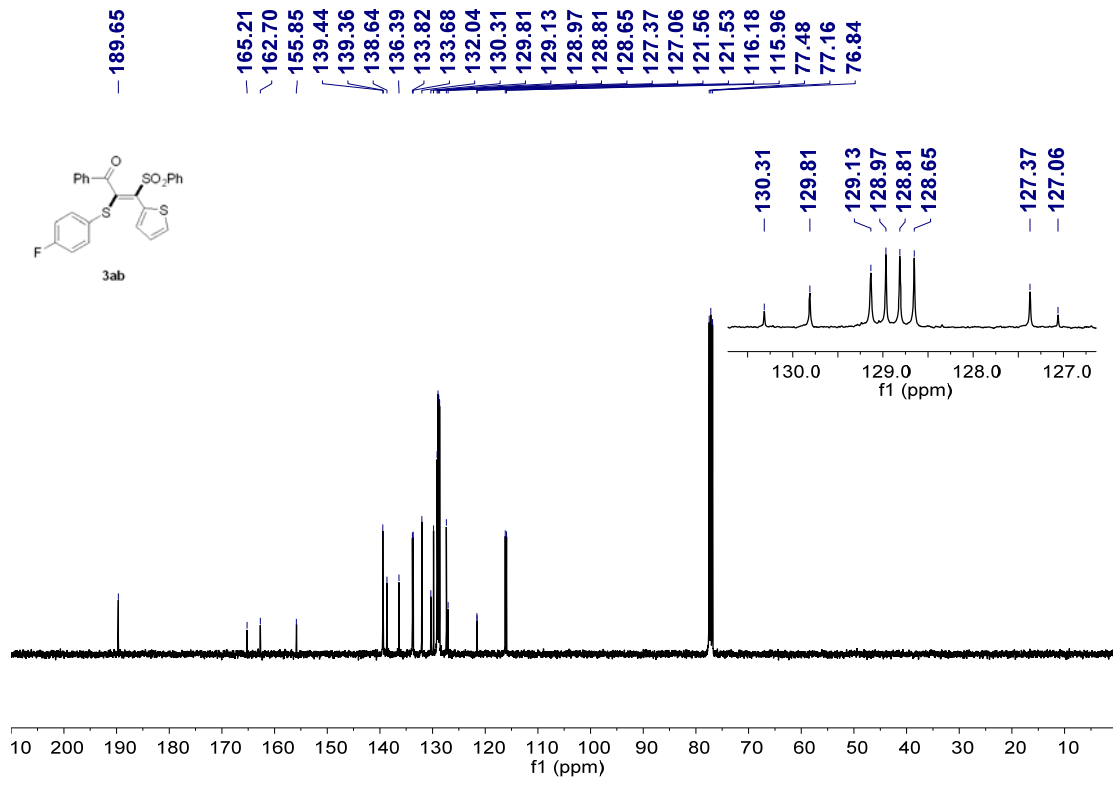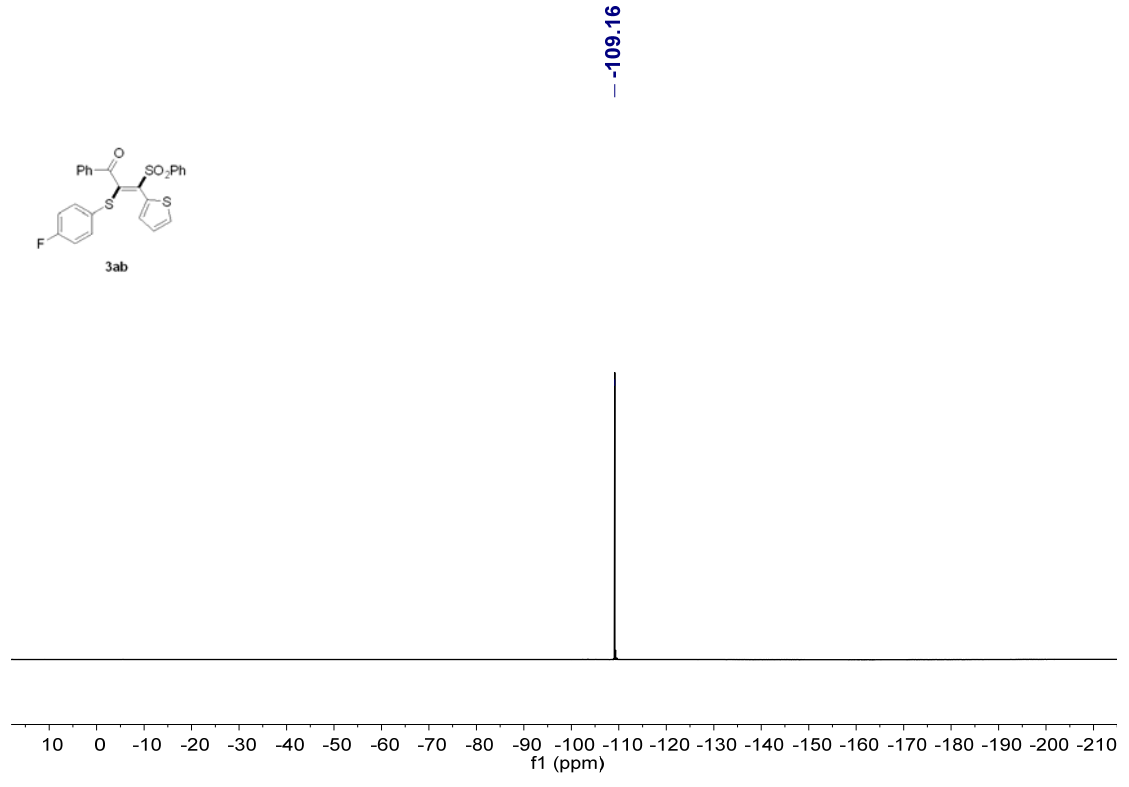



3ac

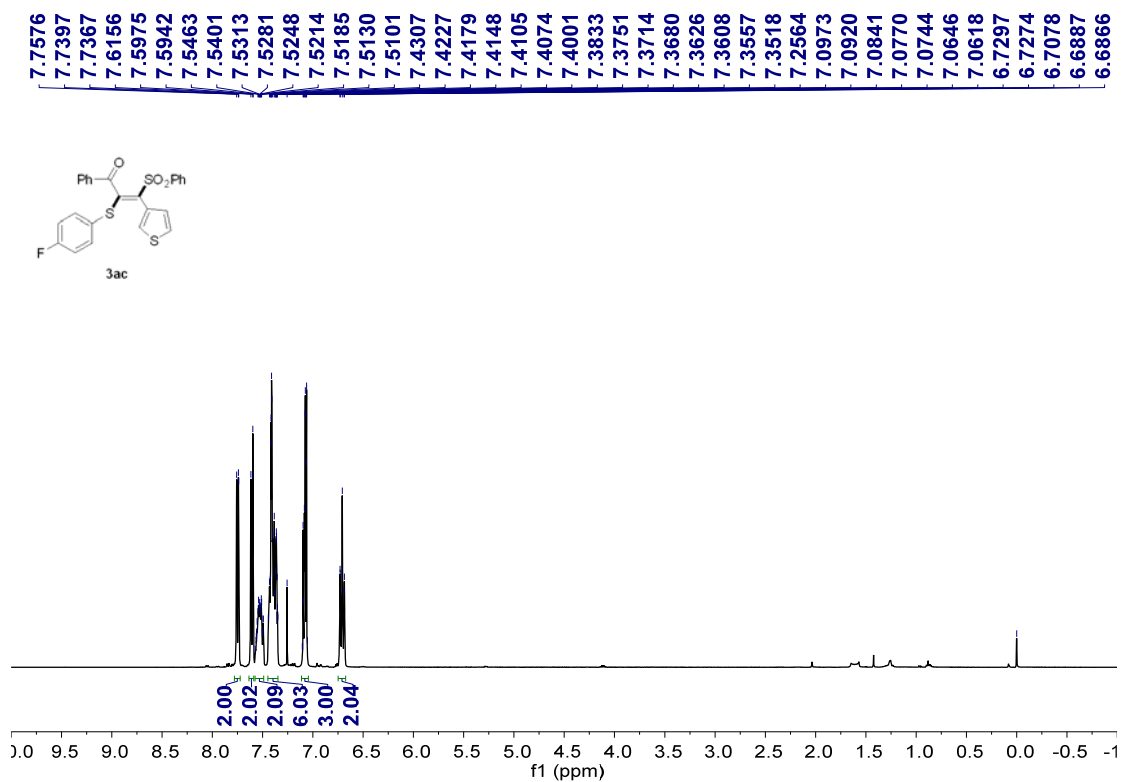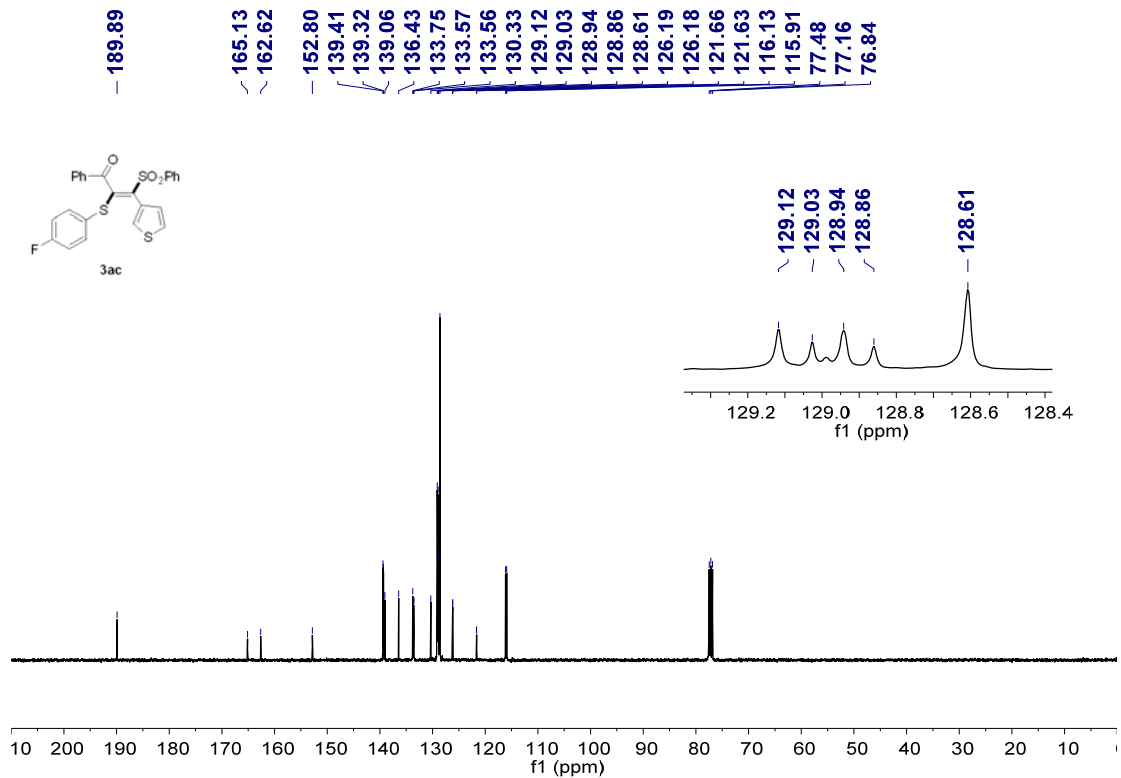

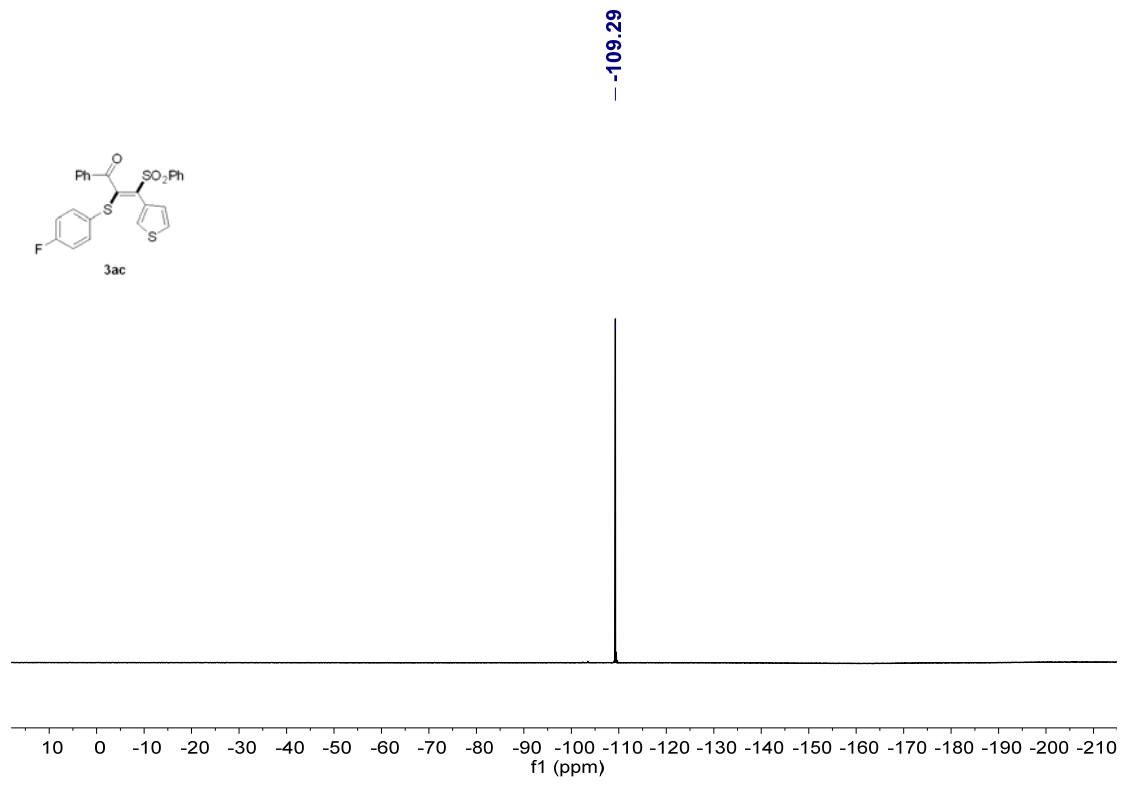

**3ad**

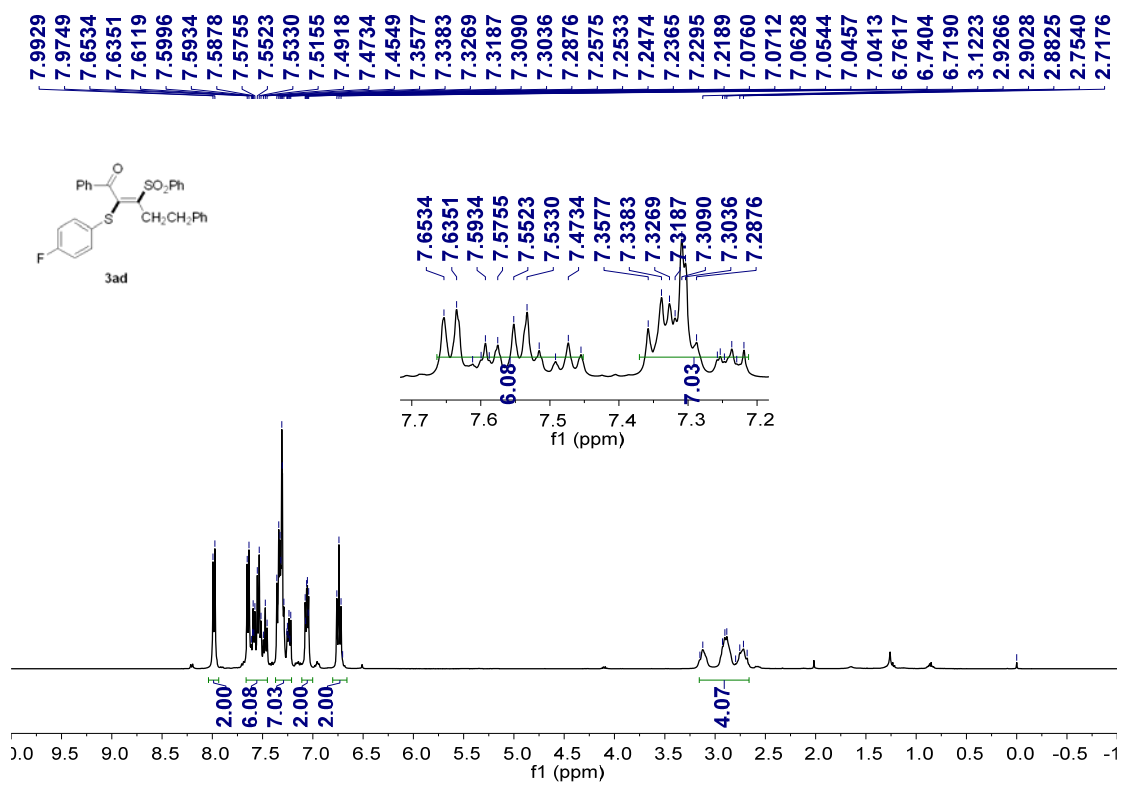

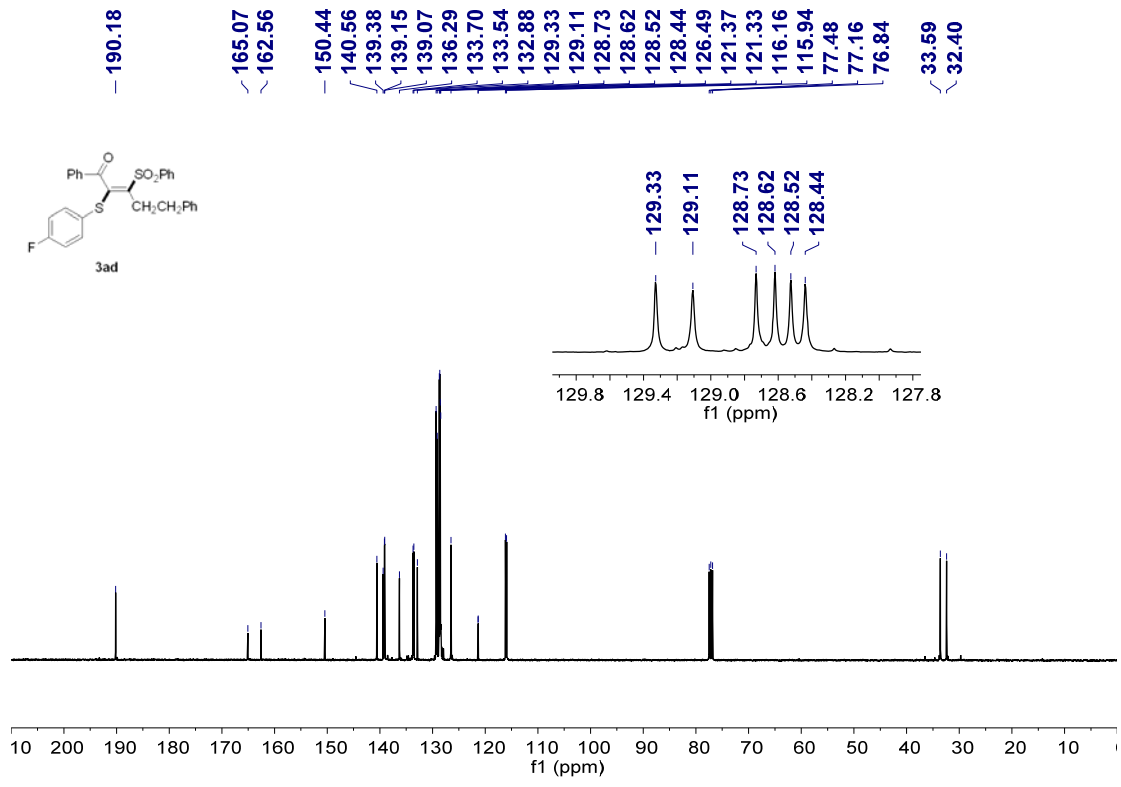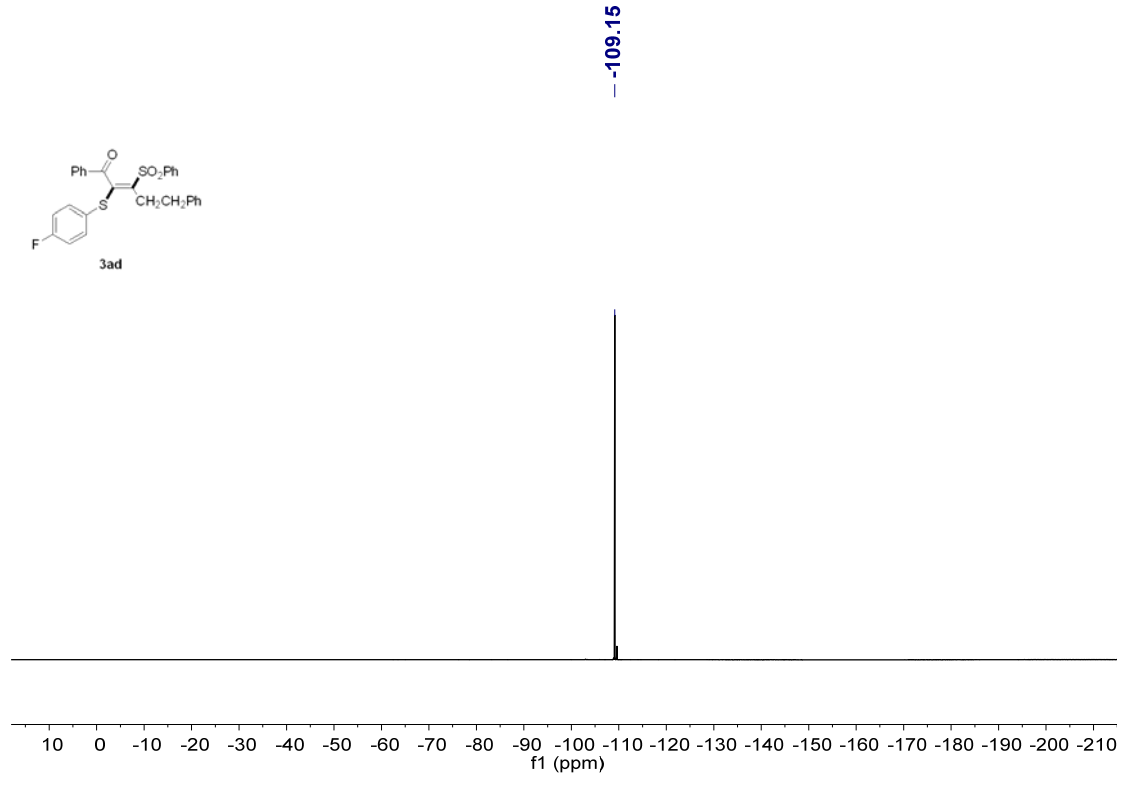

3ae

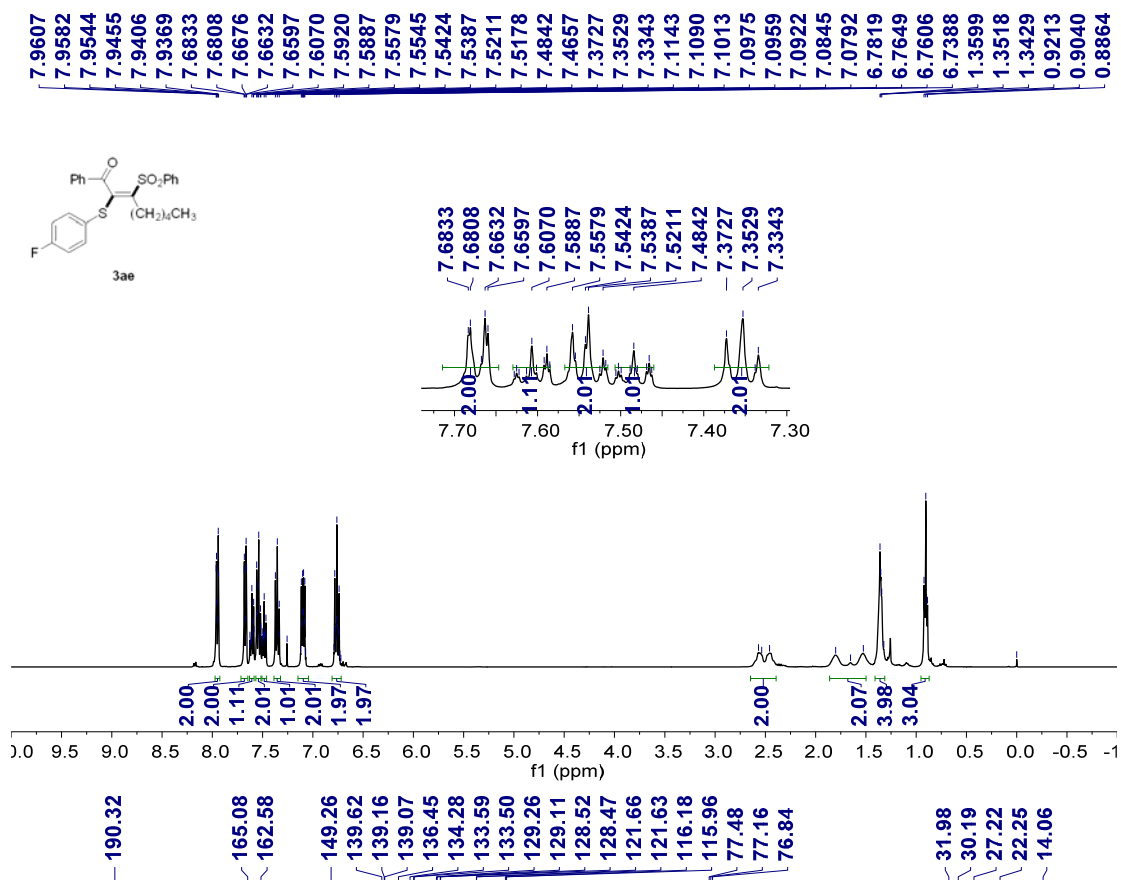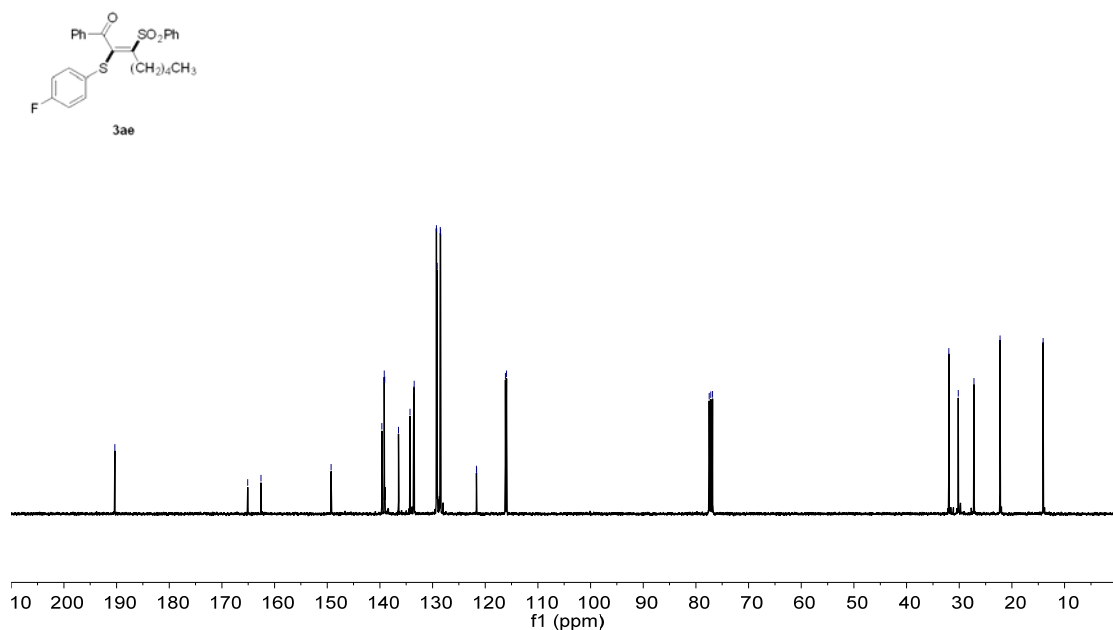

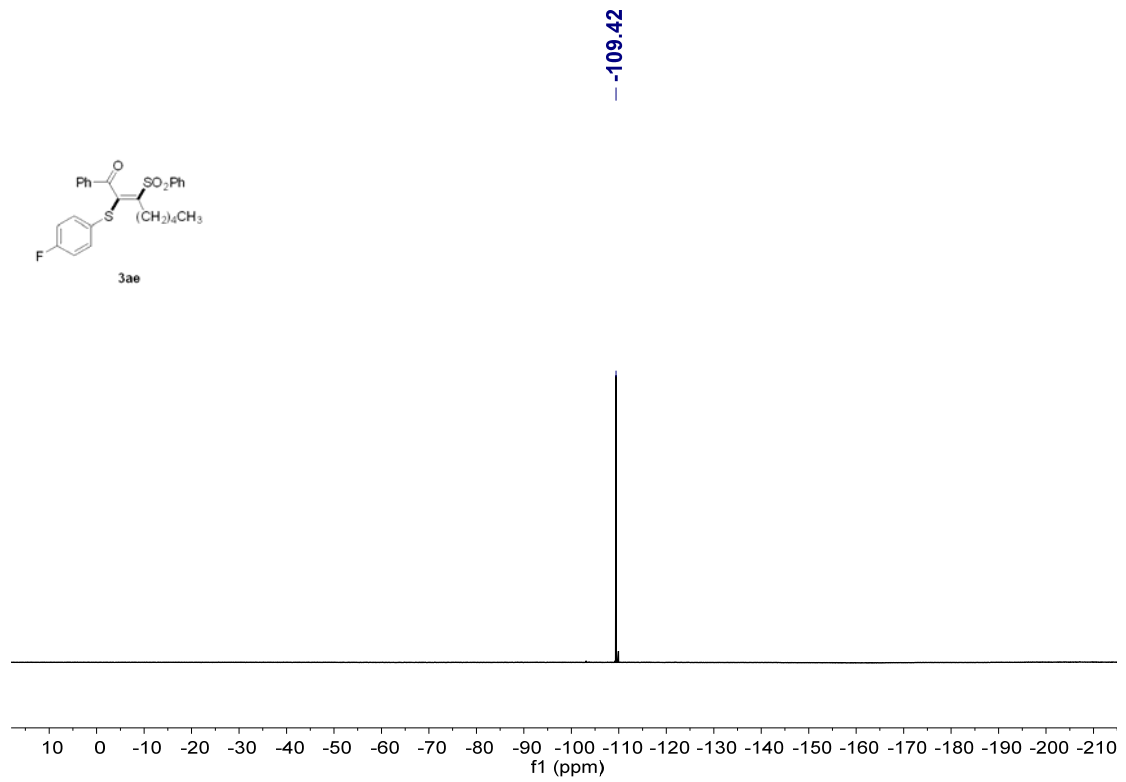

**3af**

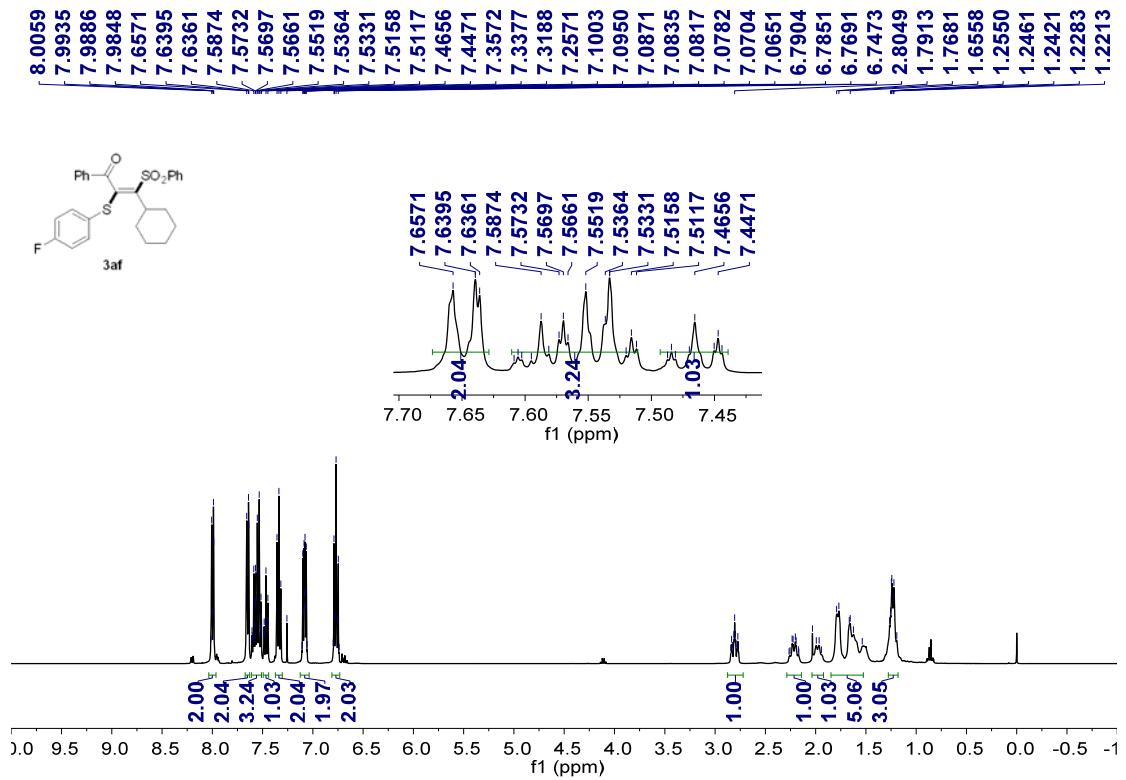

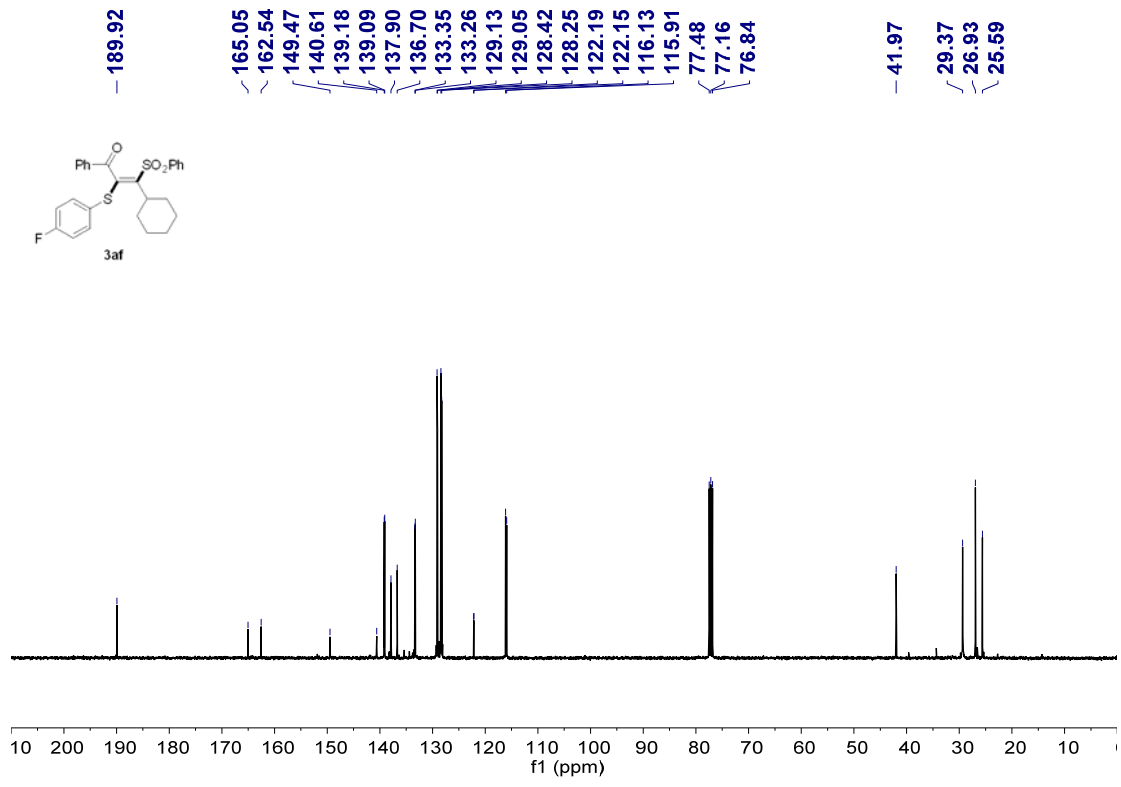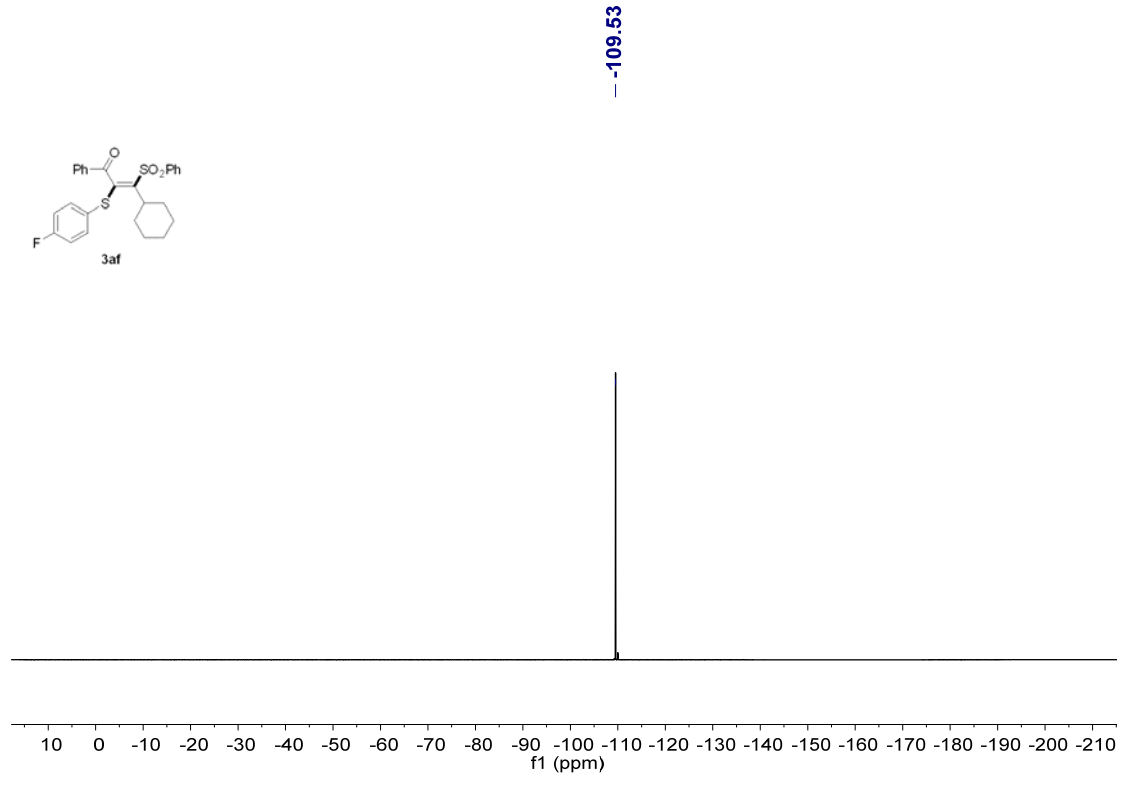

3ag

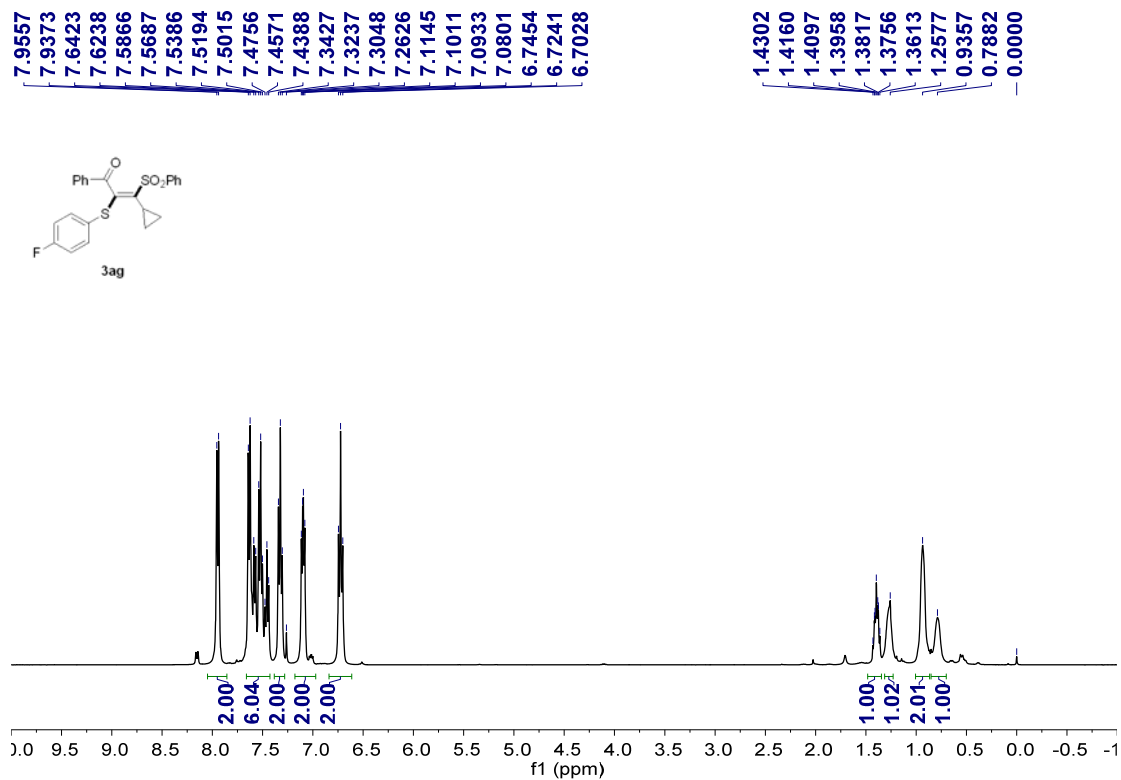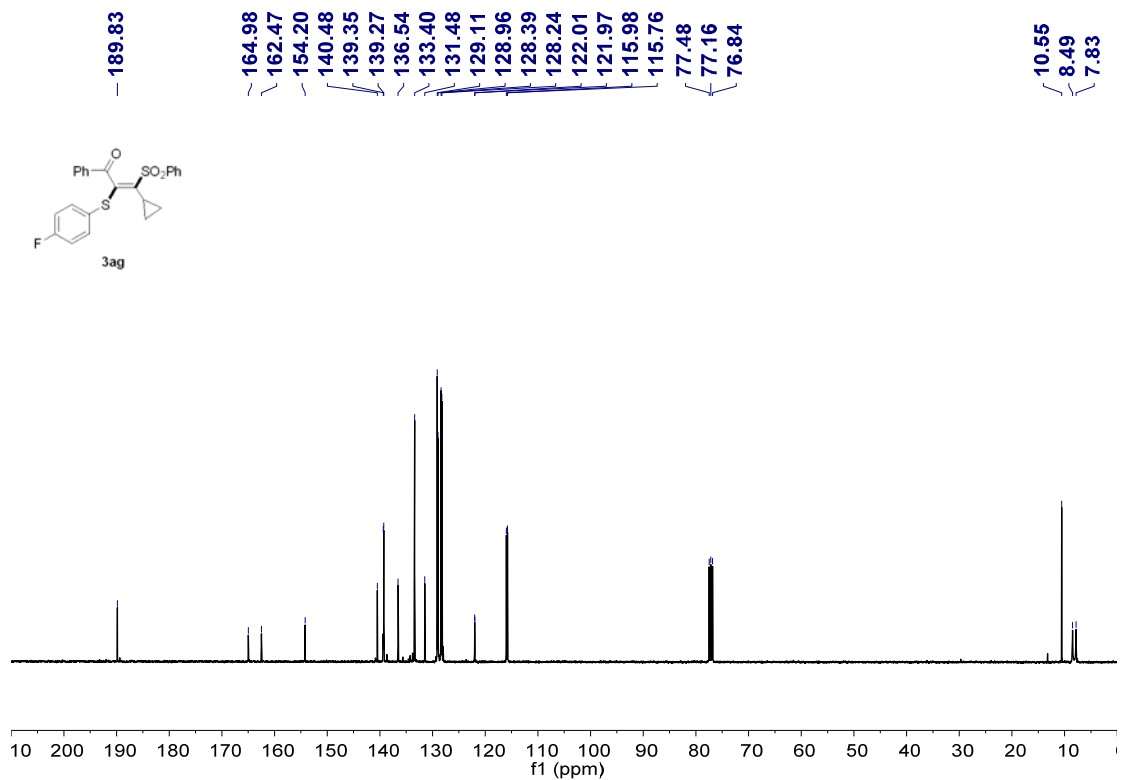

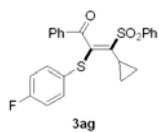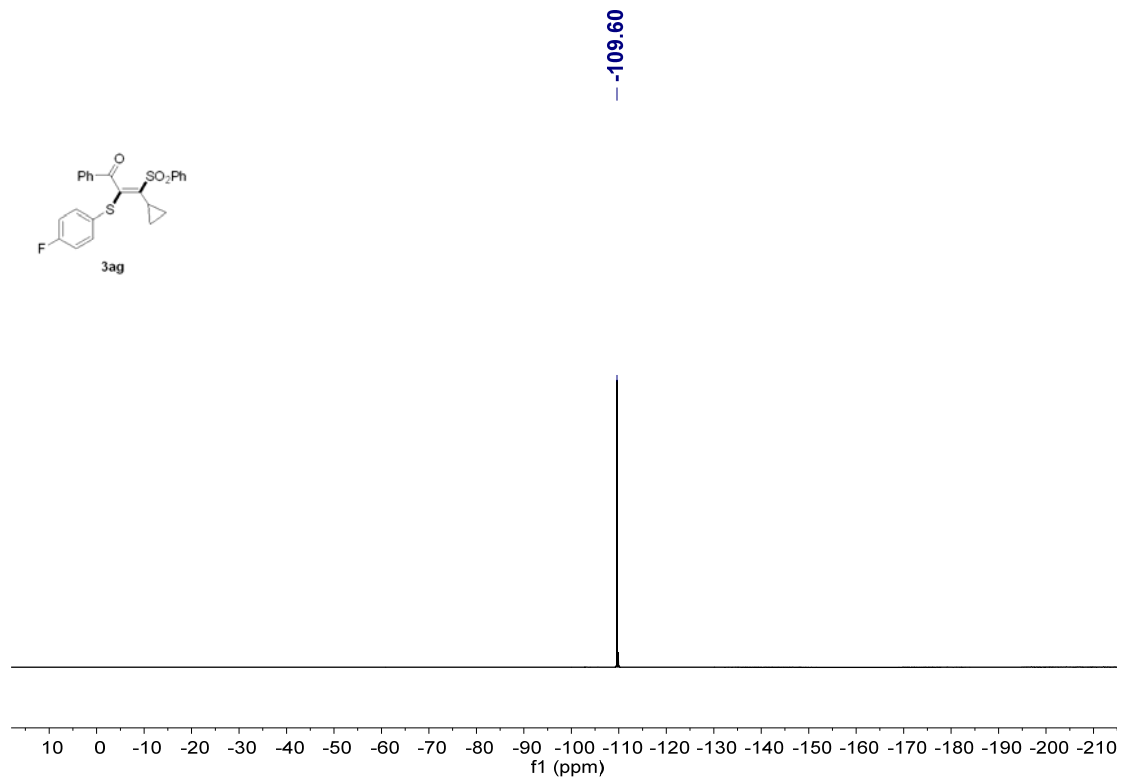

3ah

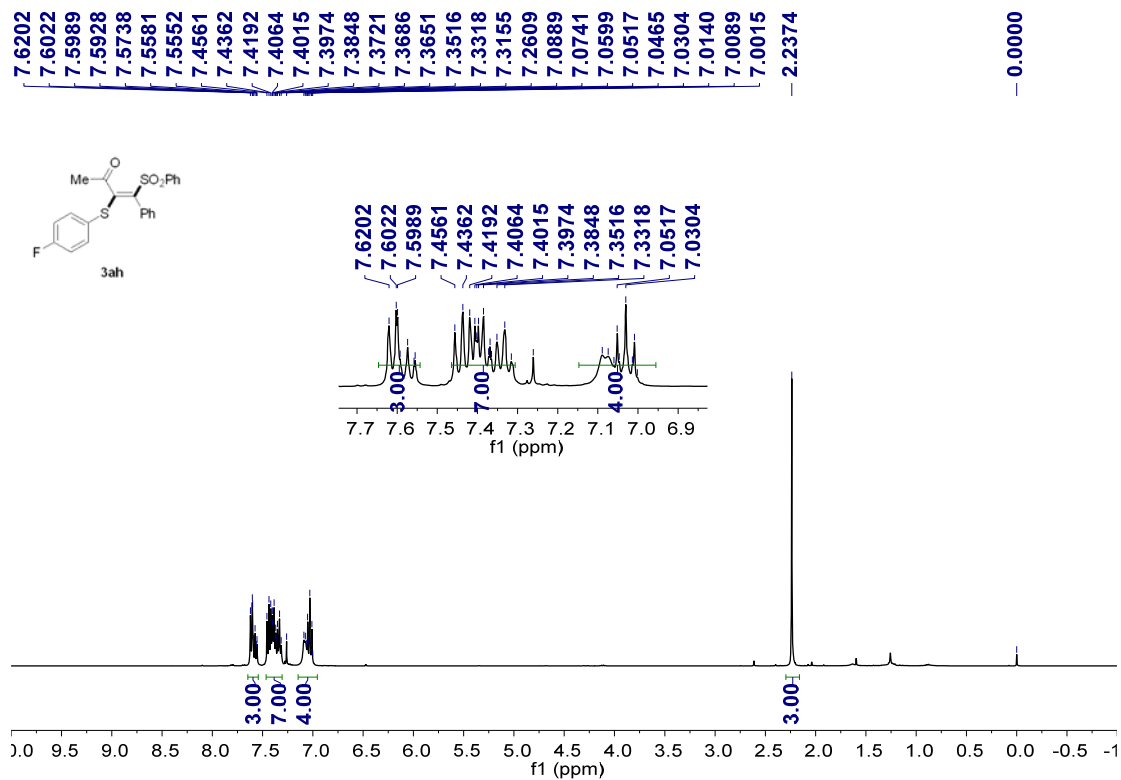



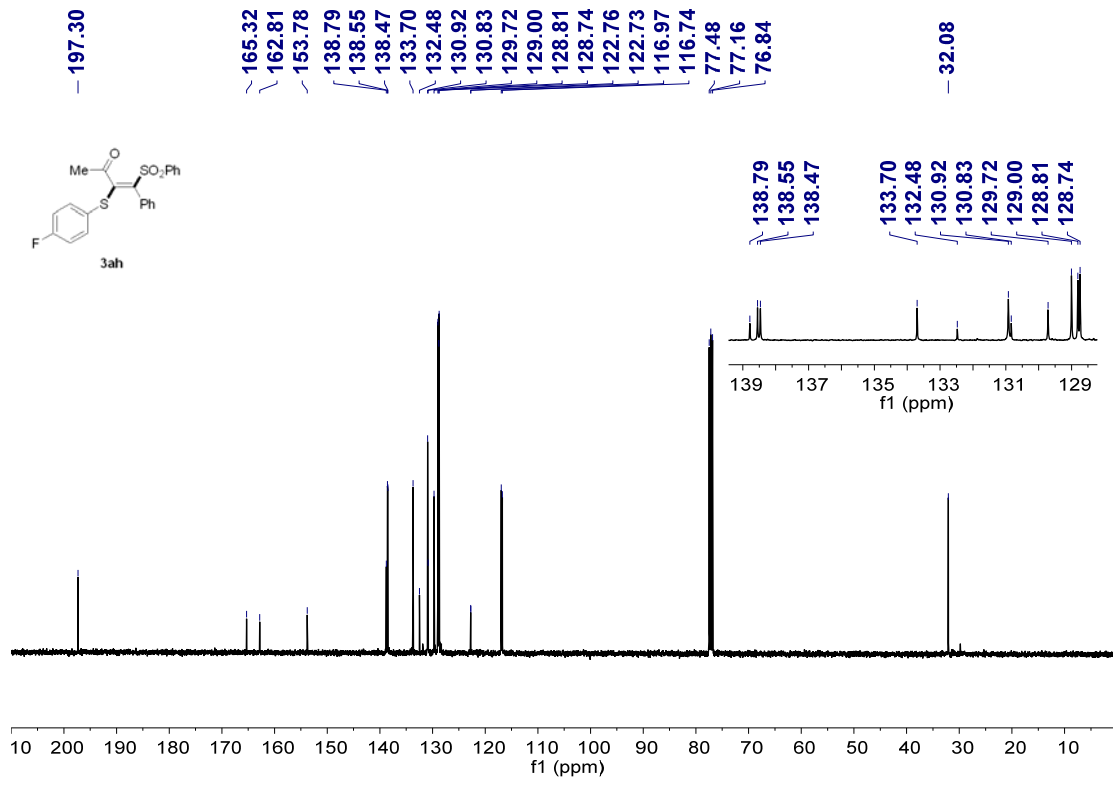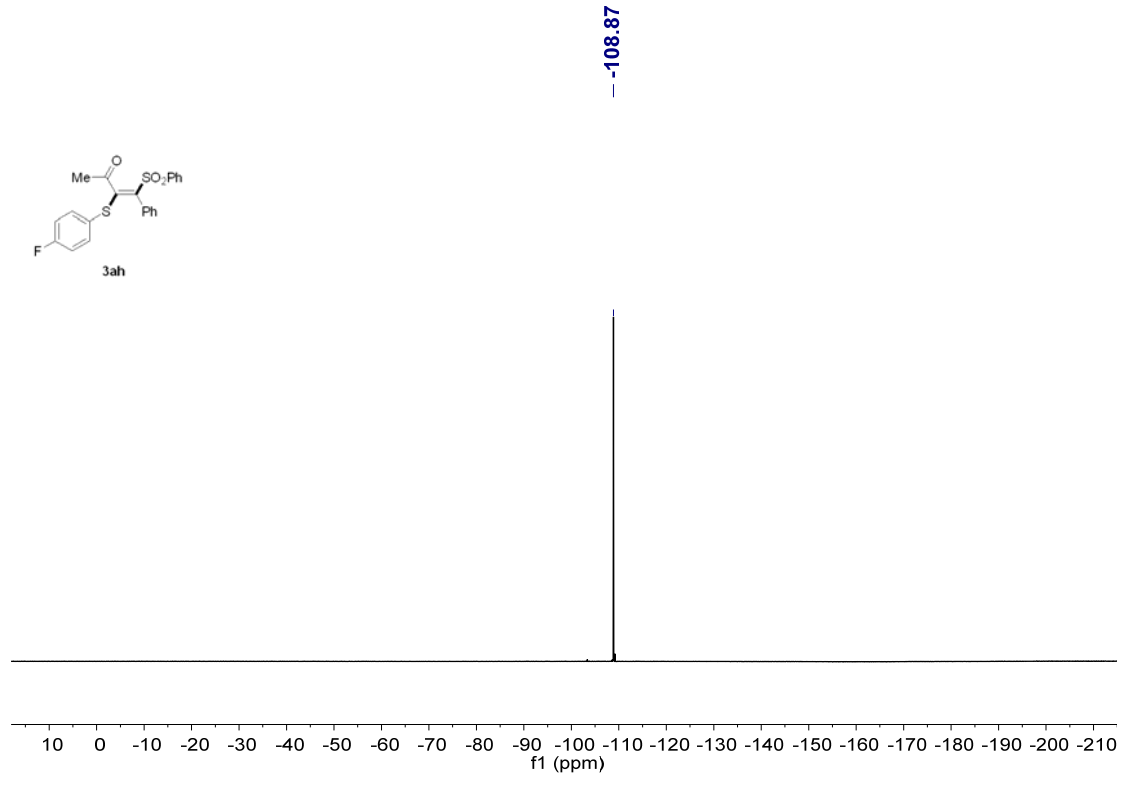

3ai

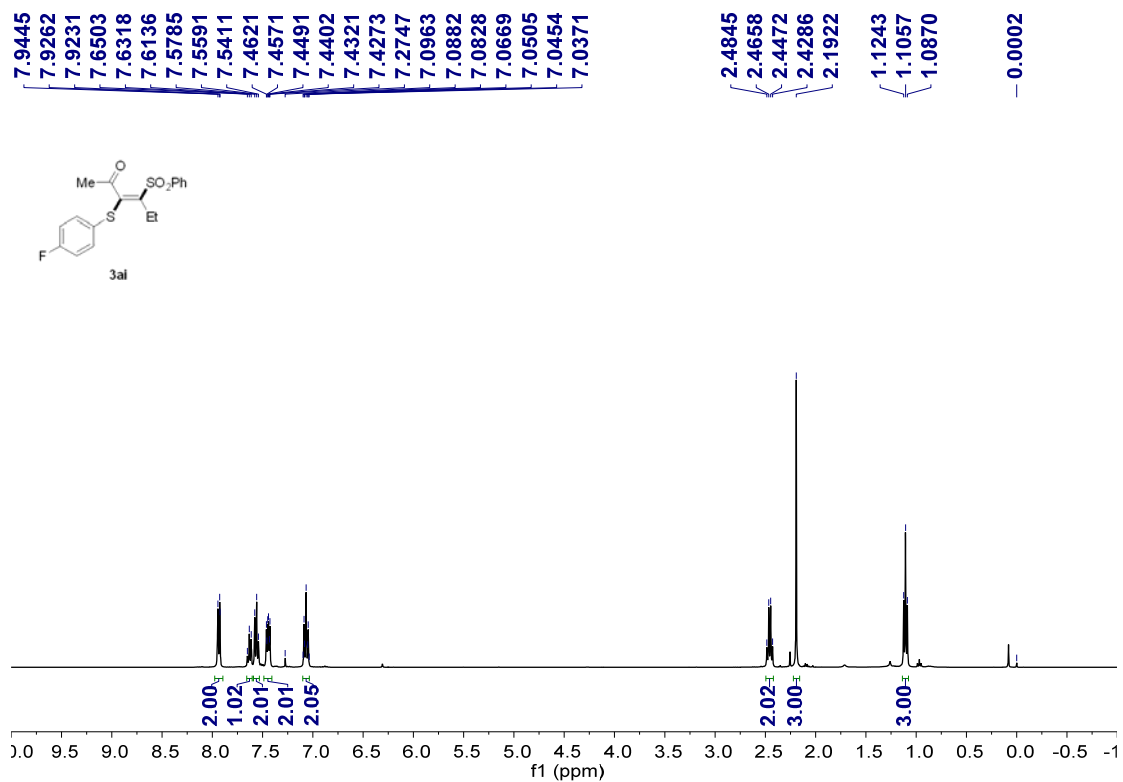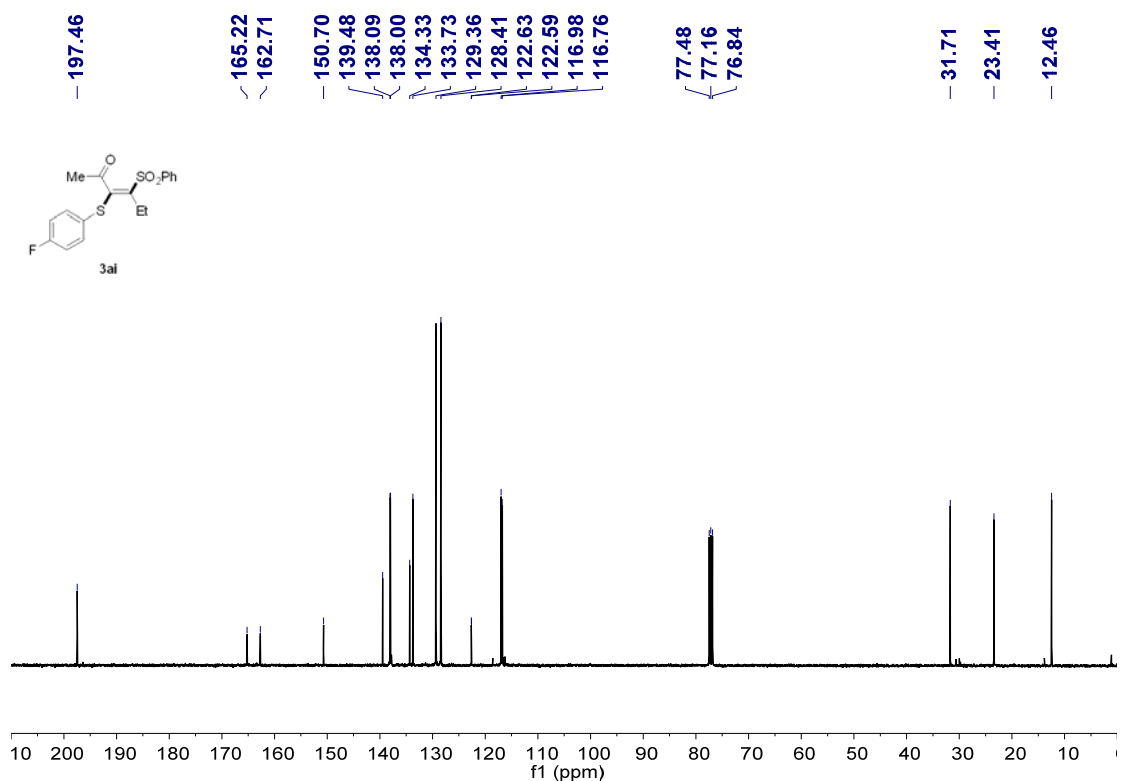

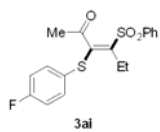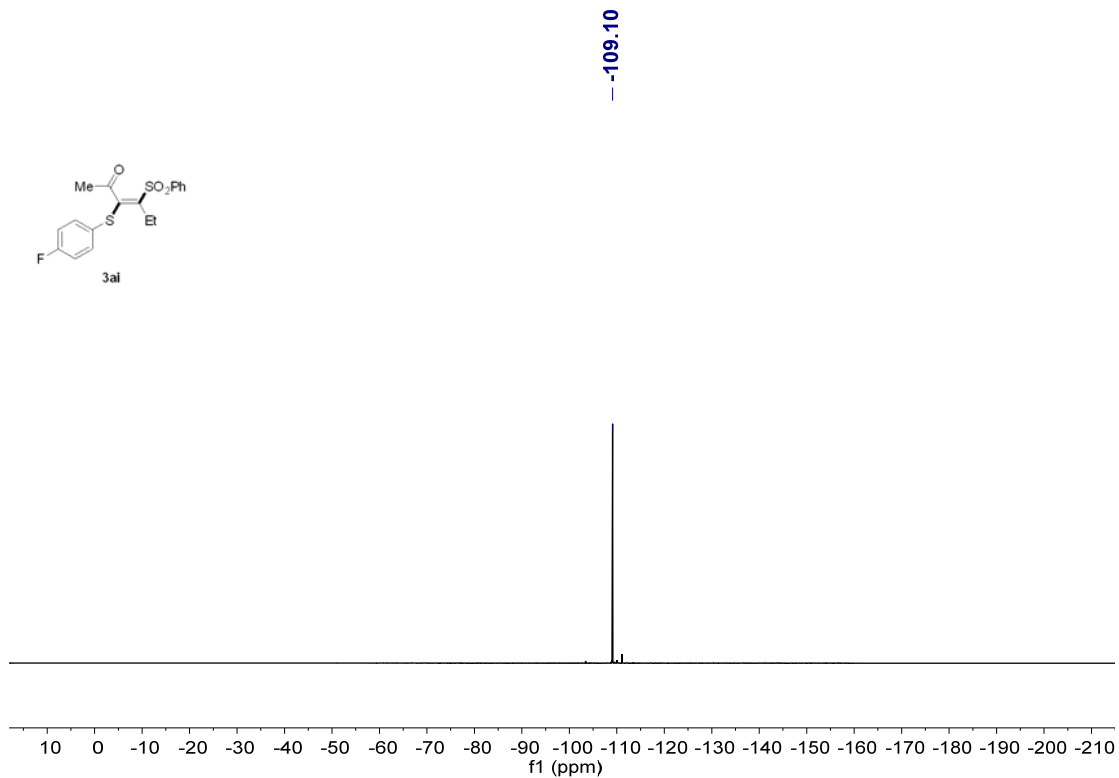

3aj

7.7729  
7.7704  
7.7527  
7.7493  
7.6270  
7.6244  
7.6112  
7.6065  
7.6032  
7.5654  
7.5499  
7.5468  
7.5027  
7.4873  
7.4842  
7.4466  
7.4427  
7.4264  
7.4233  
7.4191  
7.4147  
7.4079  
7.4032  
7.4010  
7.3902  
7.3706  
7.3519  
7.2560  
7.2450  
7.2423  
7.1834  
7.1651  
7.1468  
7.0976  
7.0945  
7.0822  
7.0773  
7.0736  
7.0321  
7.0277  
7.0137  
6.9942  
0.0000

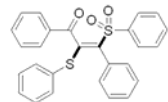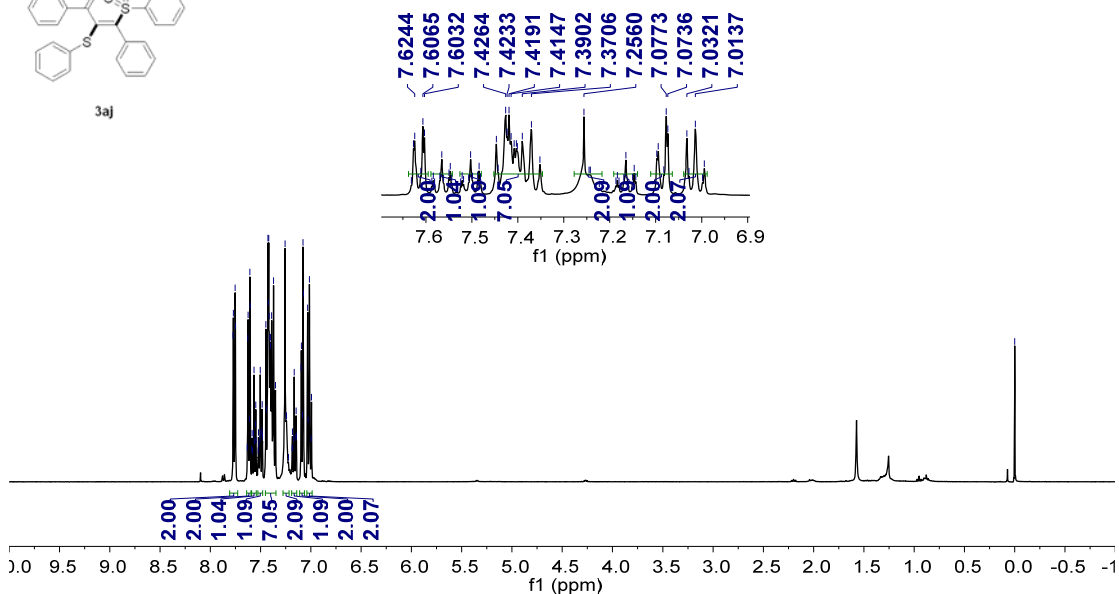

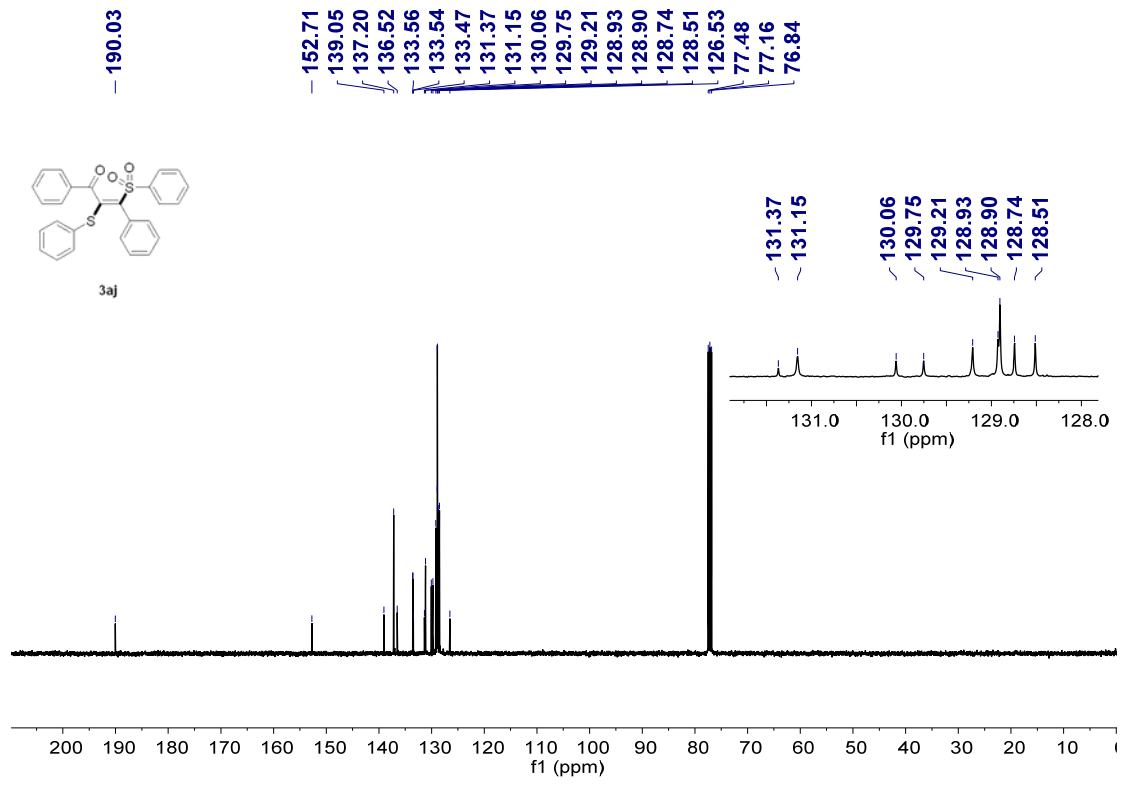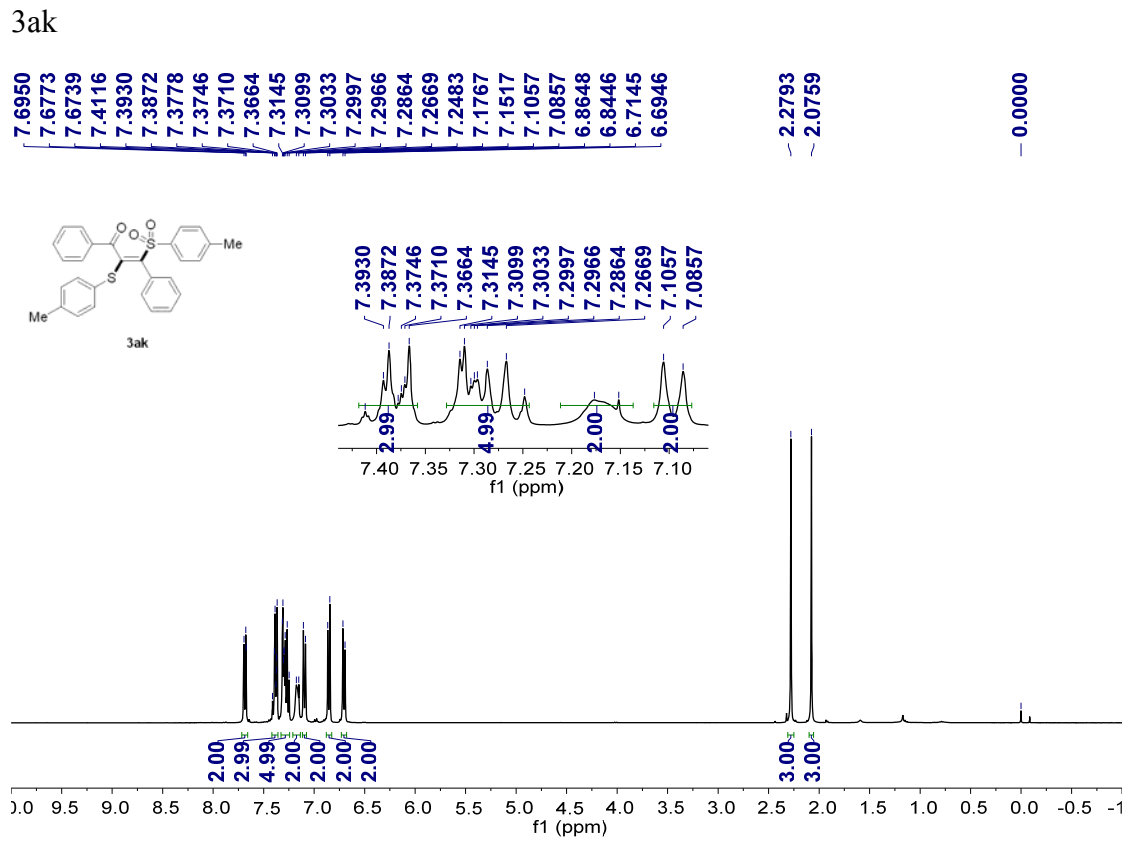

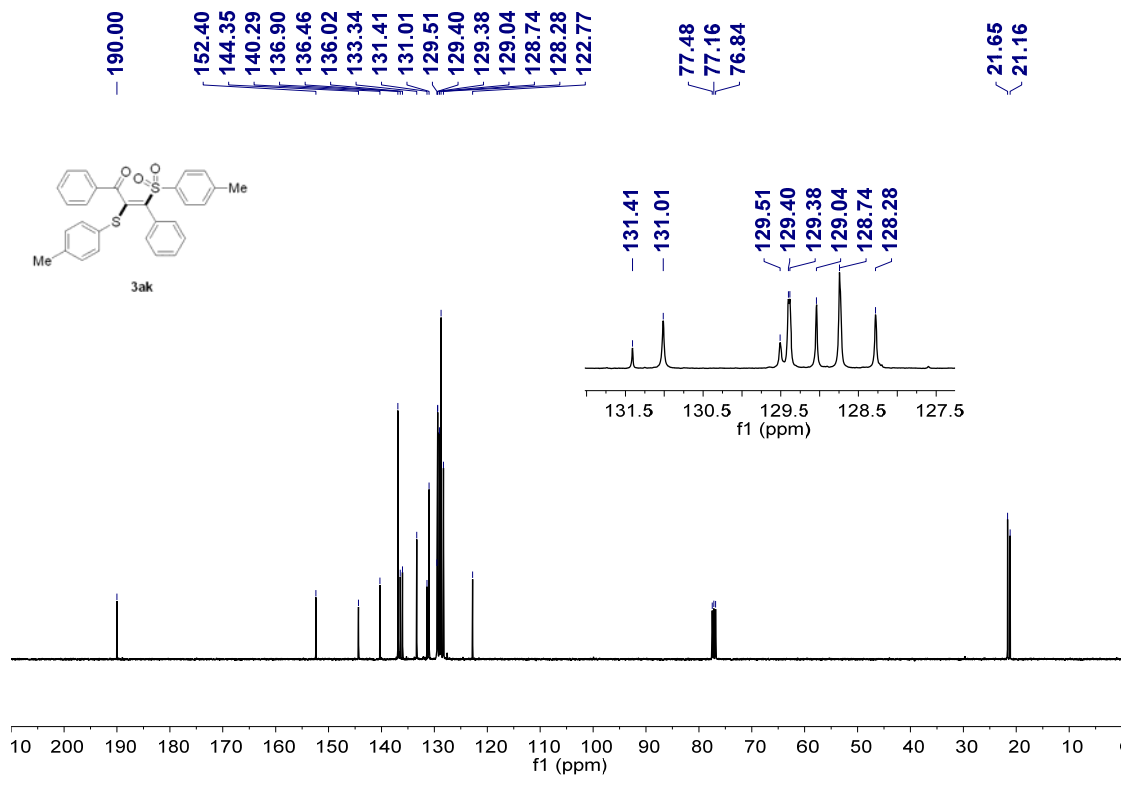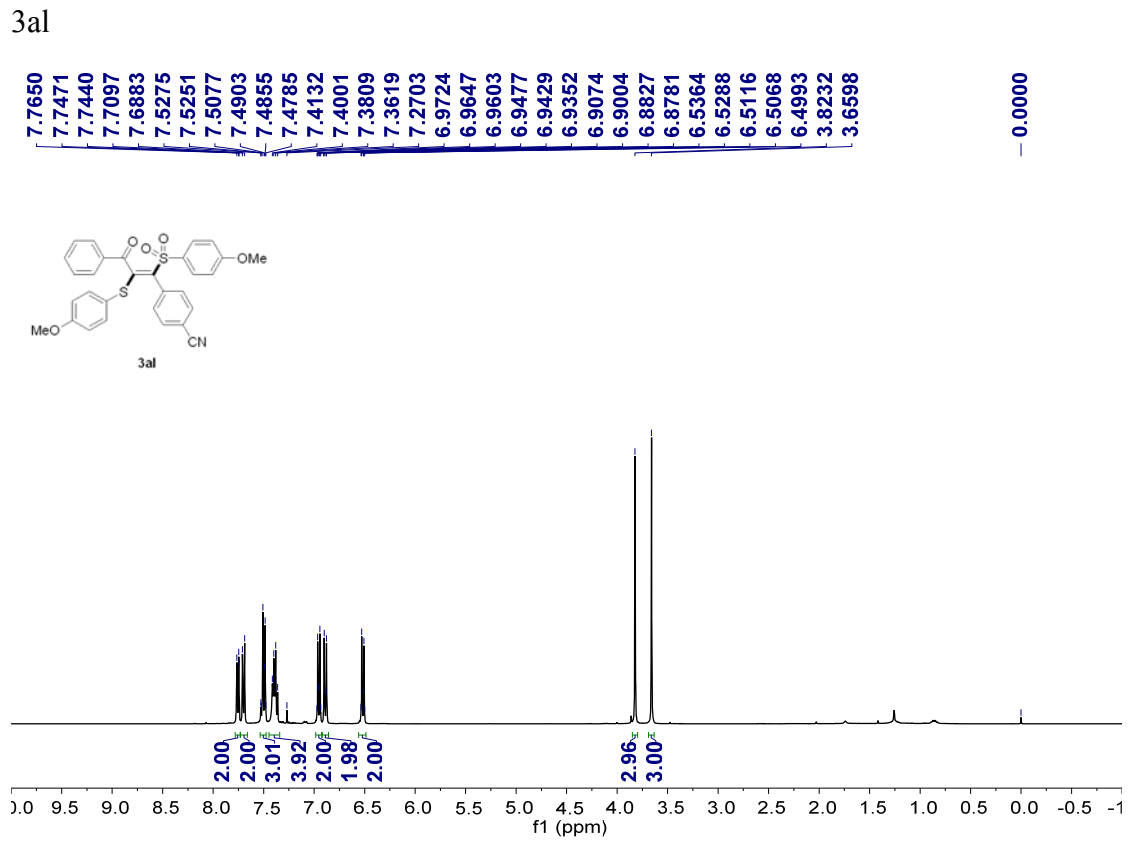

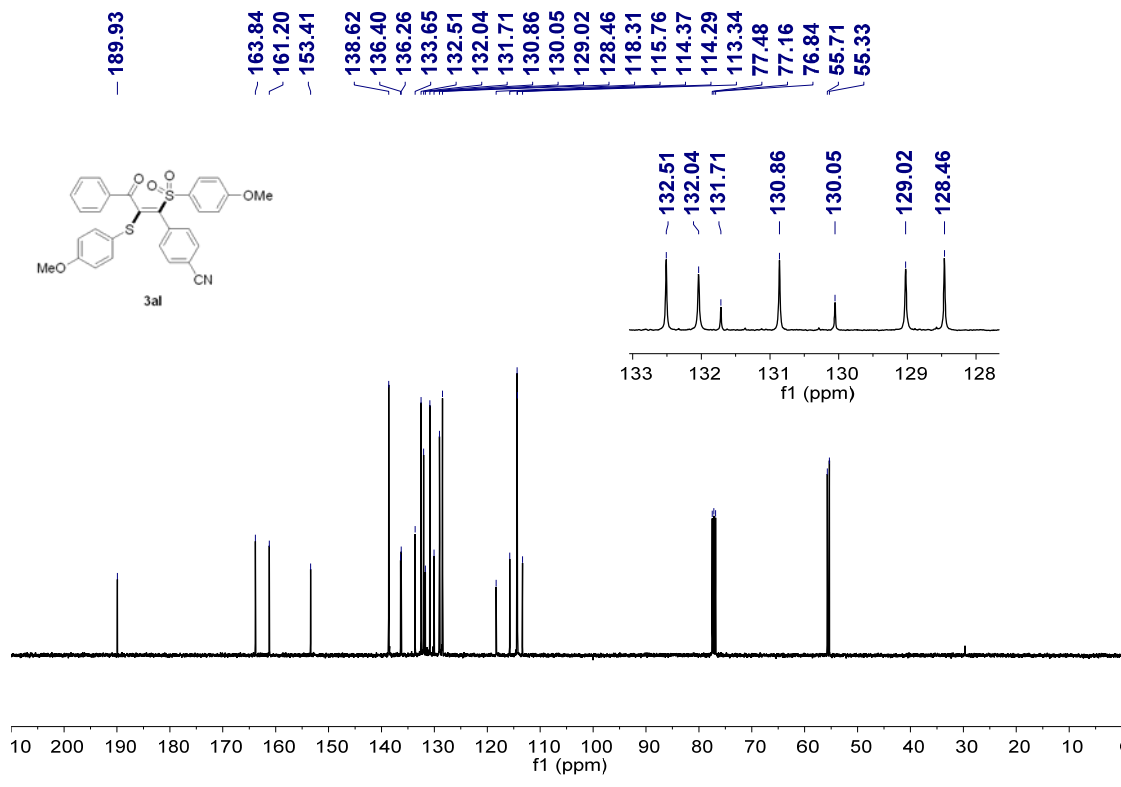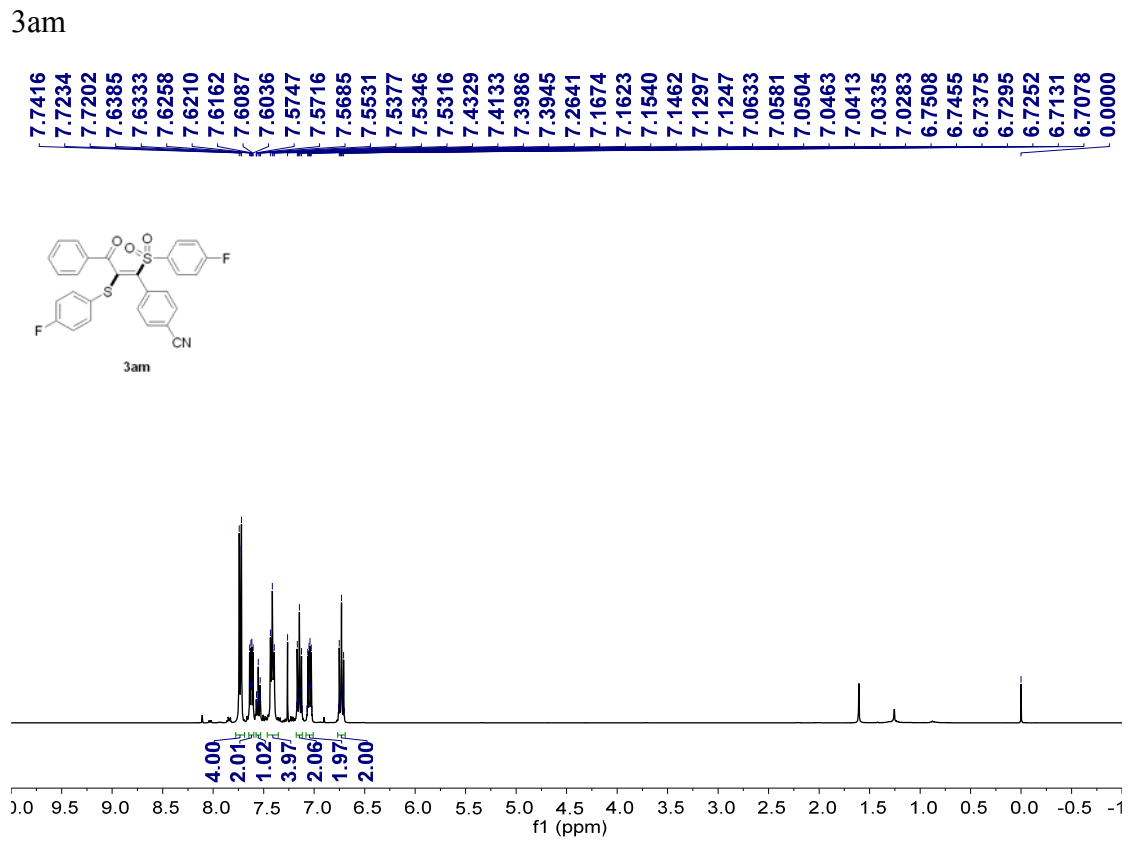

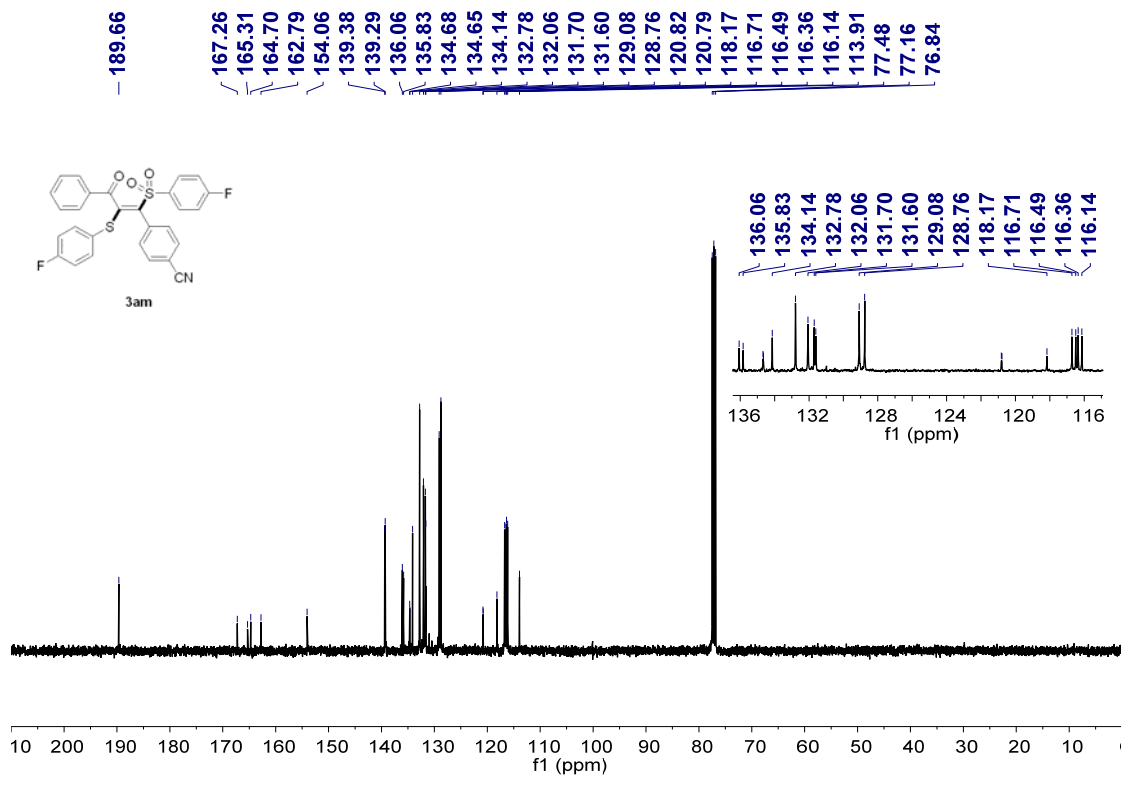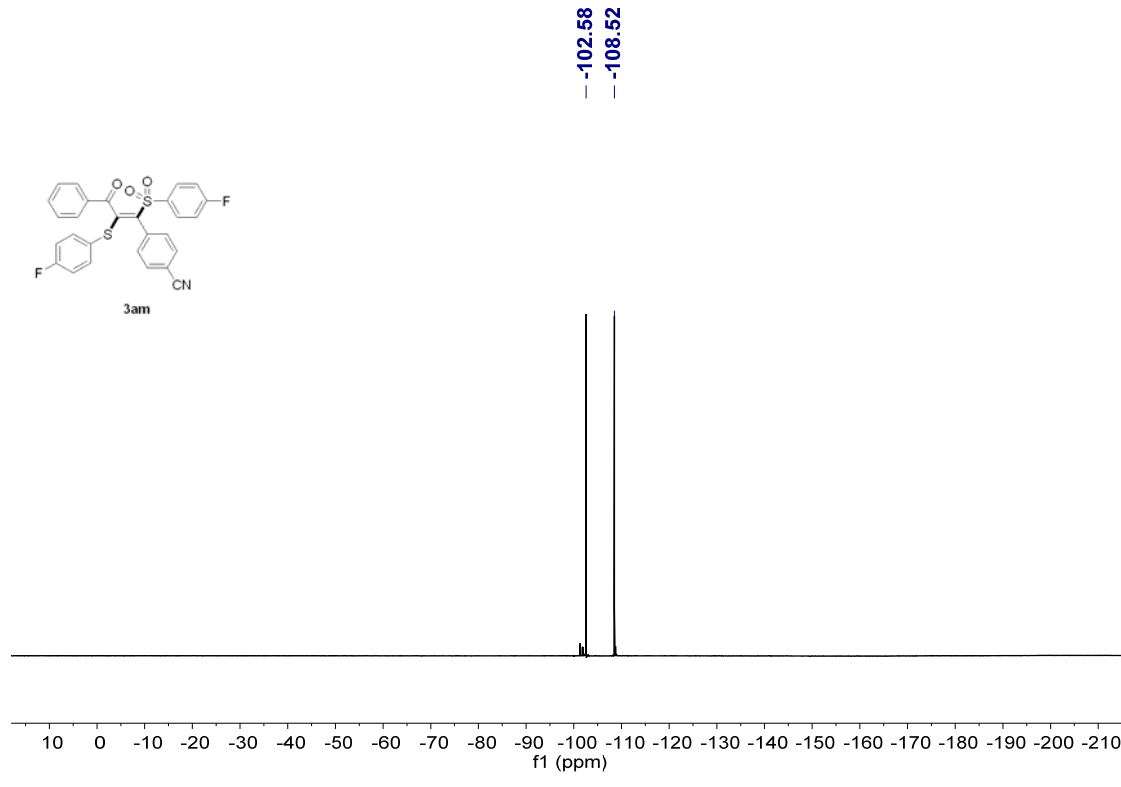

3an

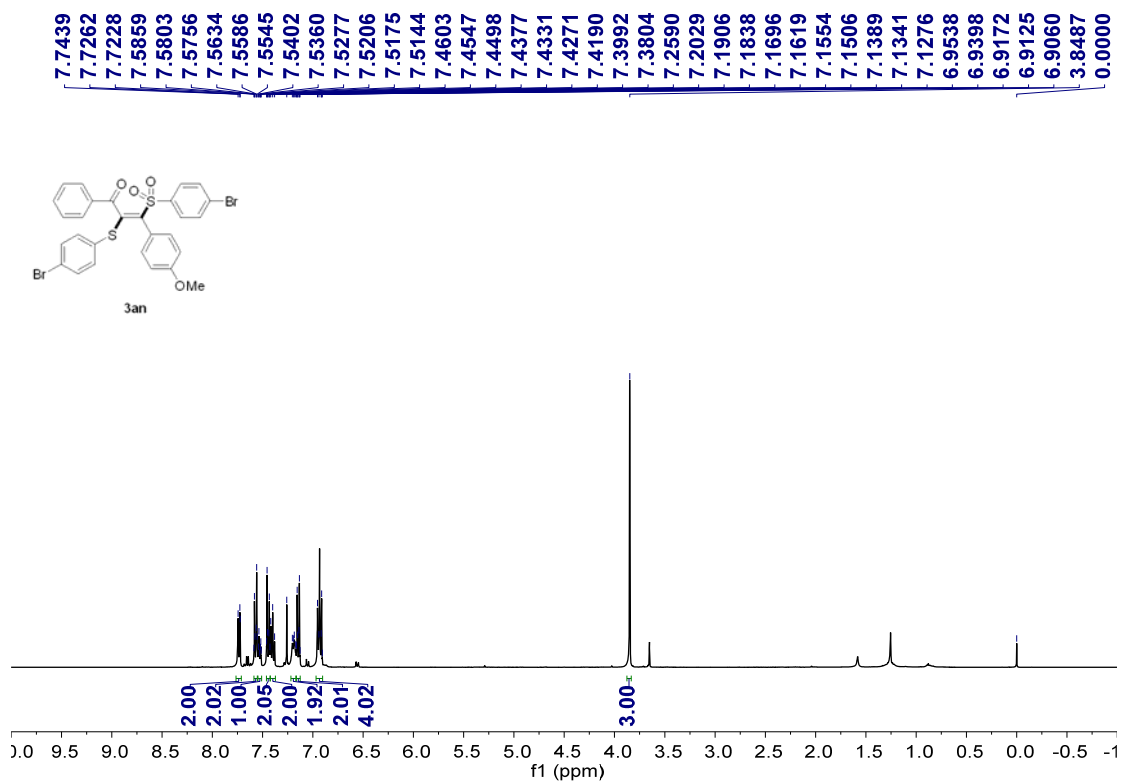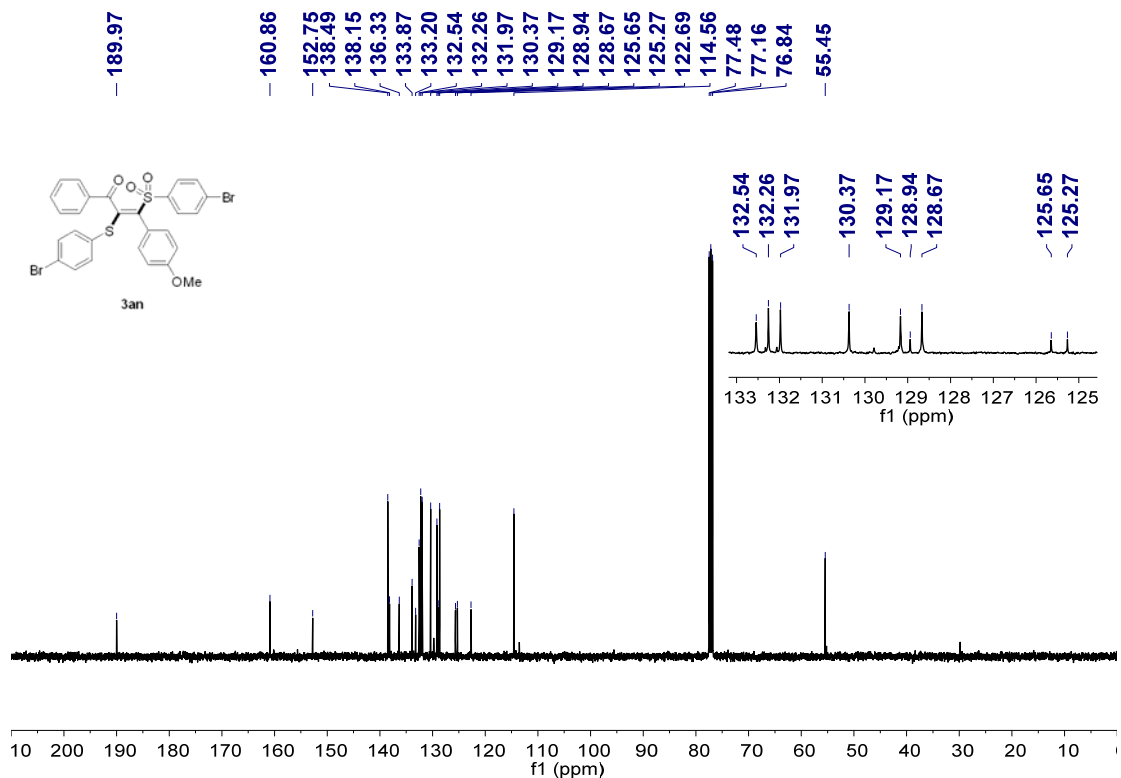



3ao

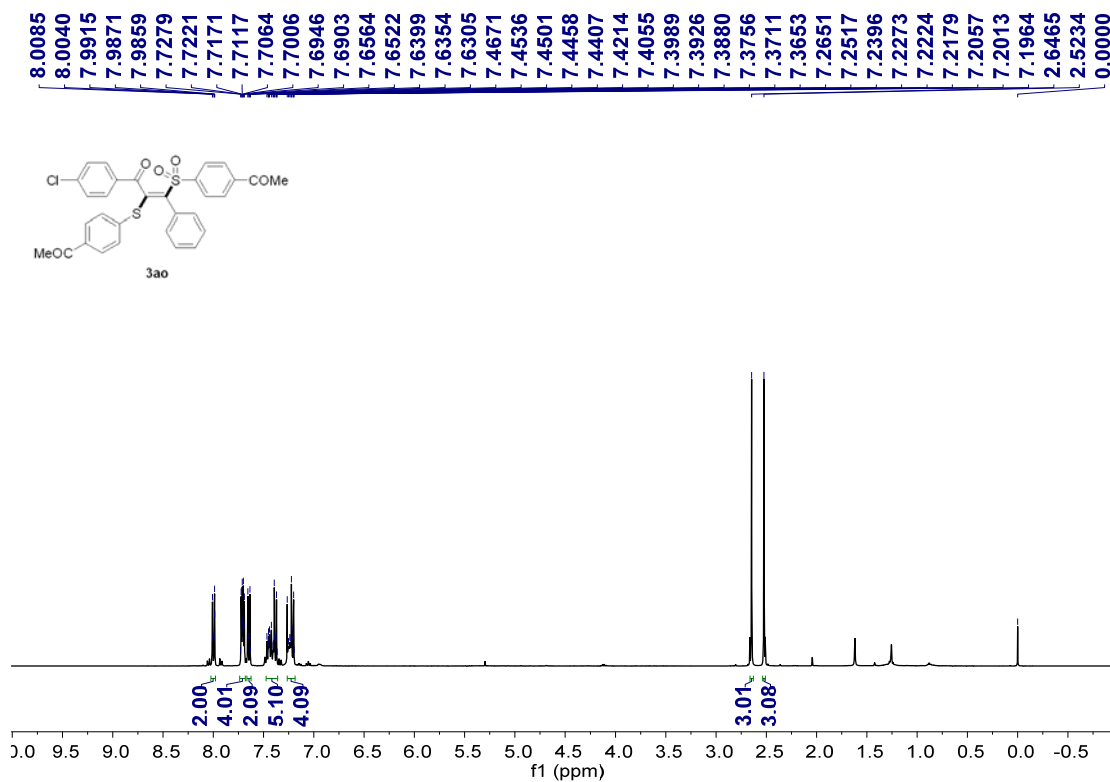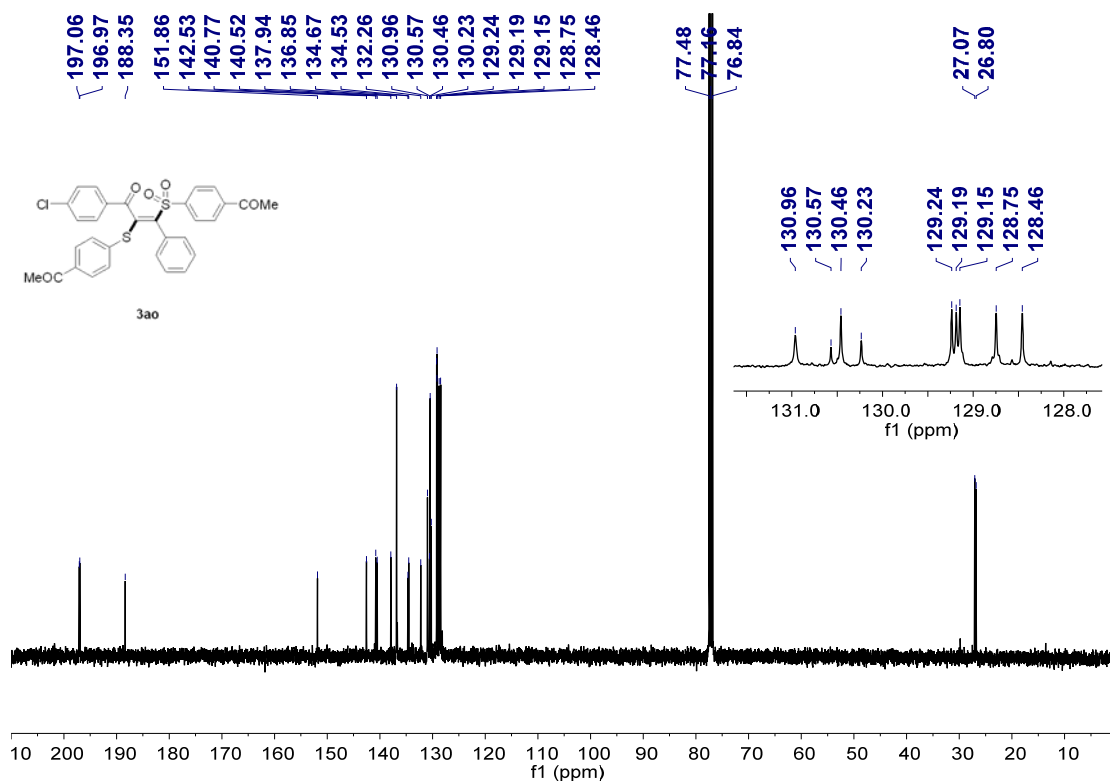

3ap

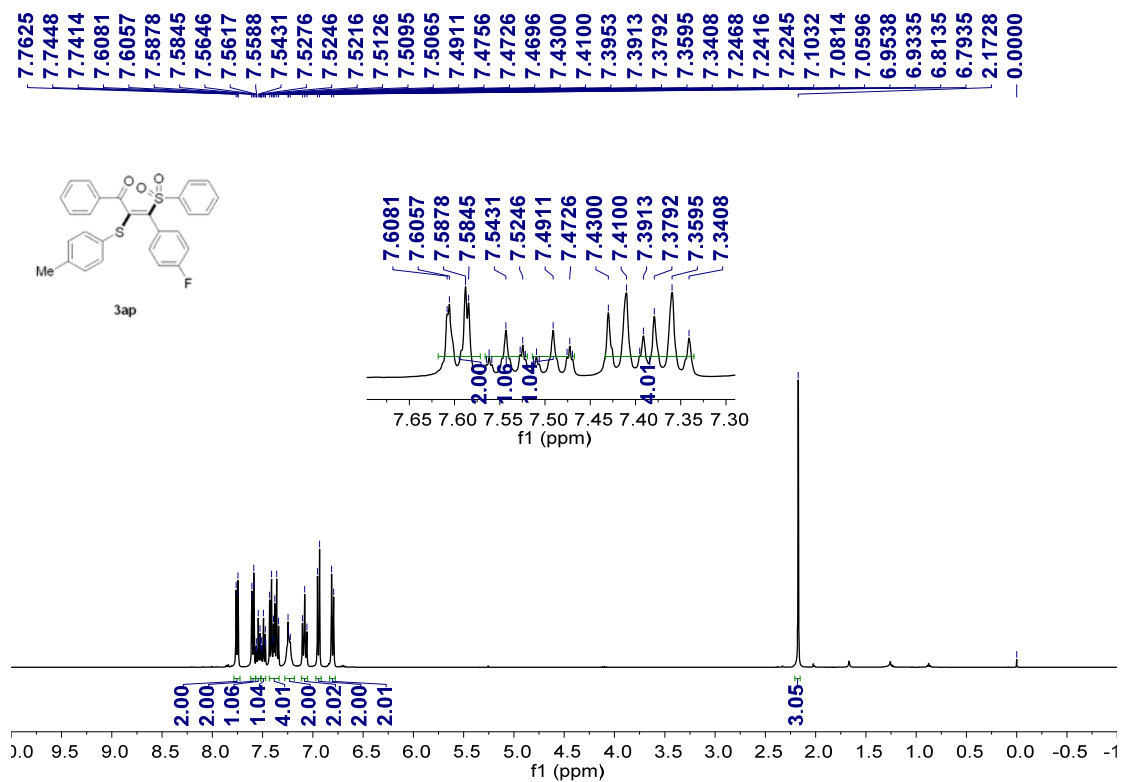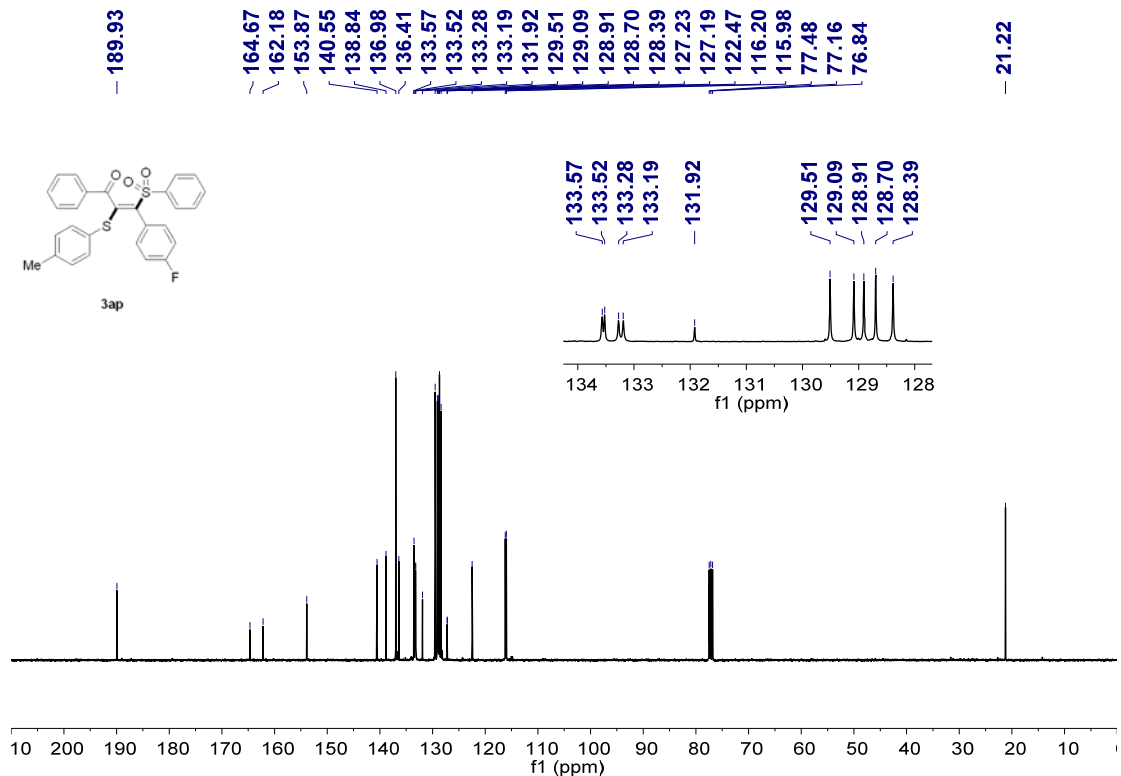

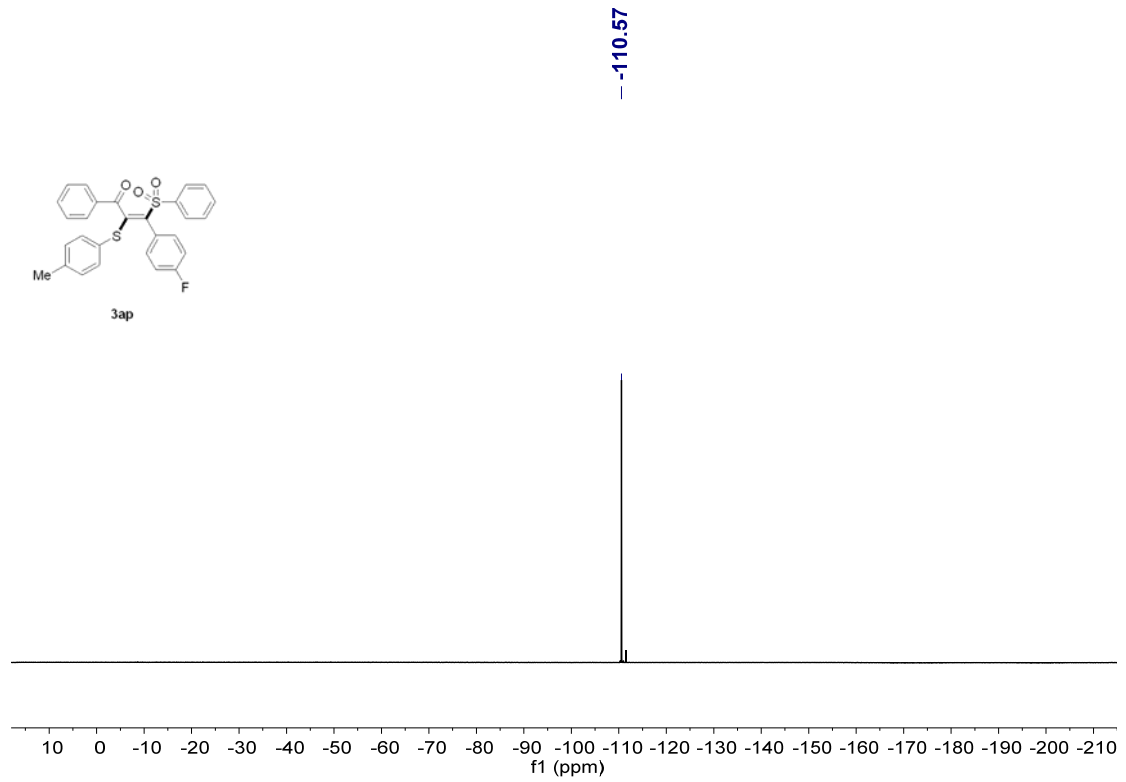

**3aq**

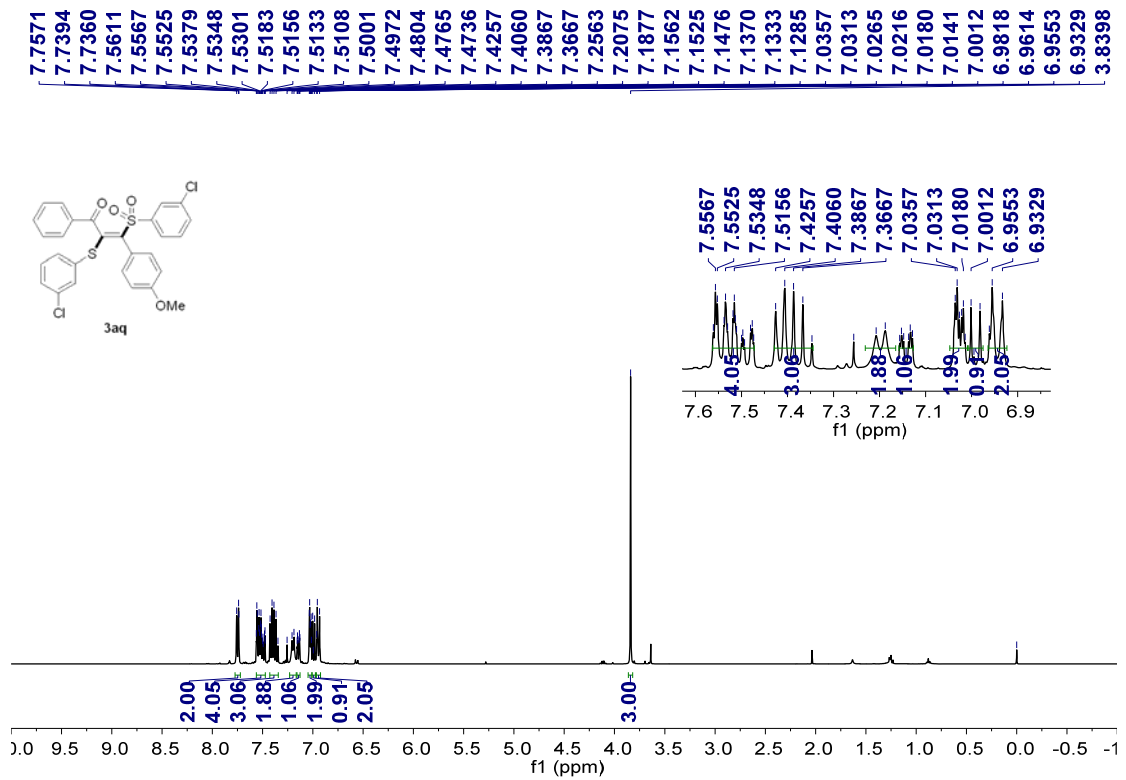

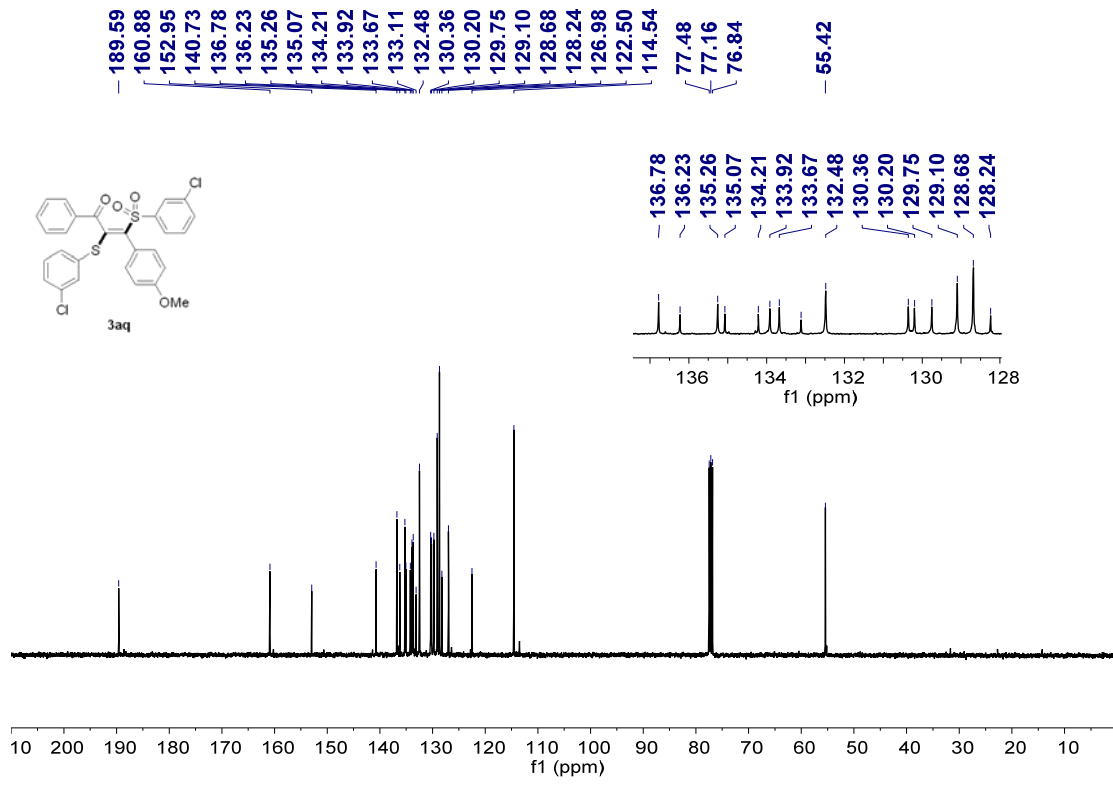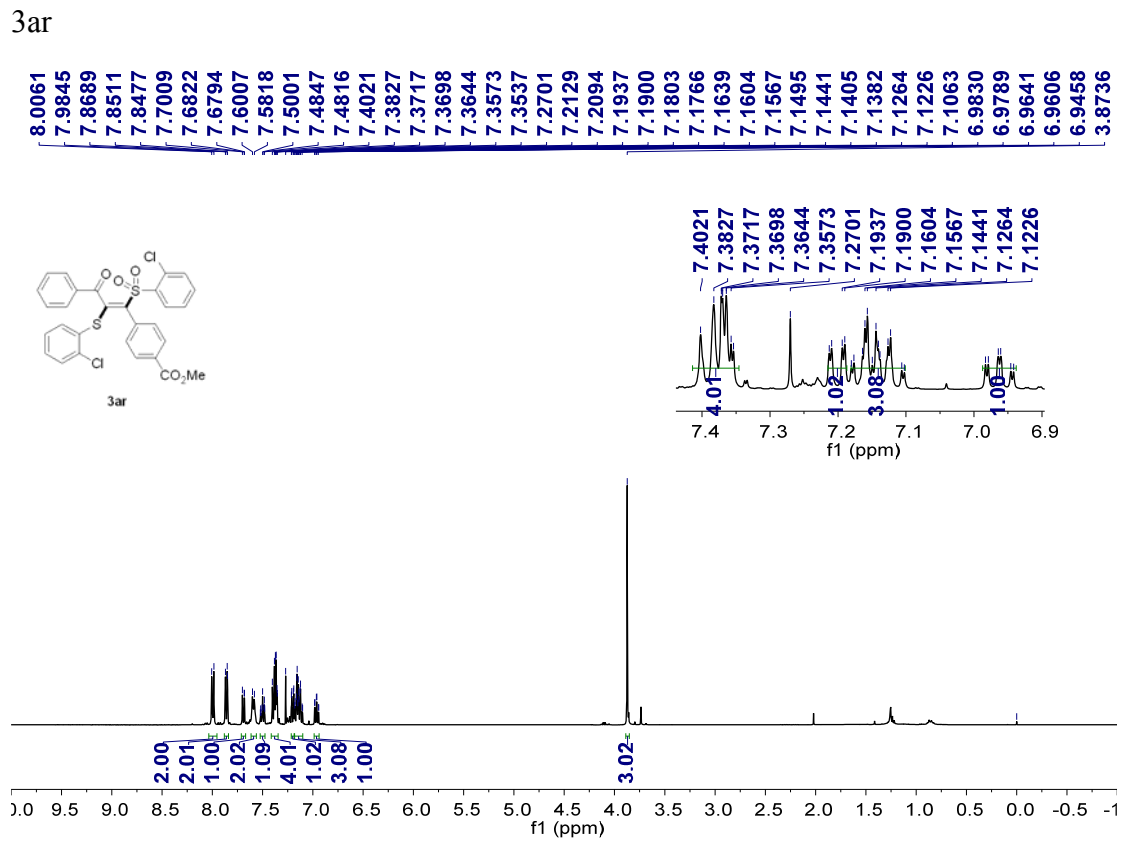

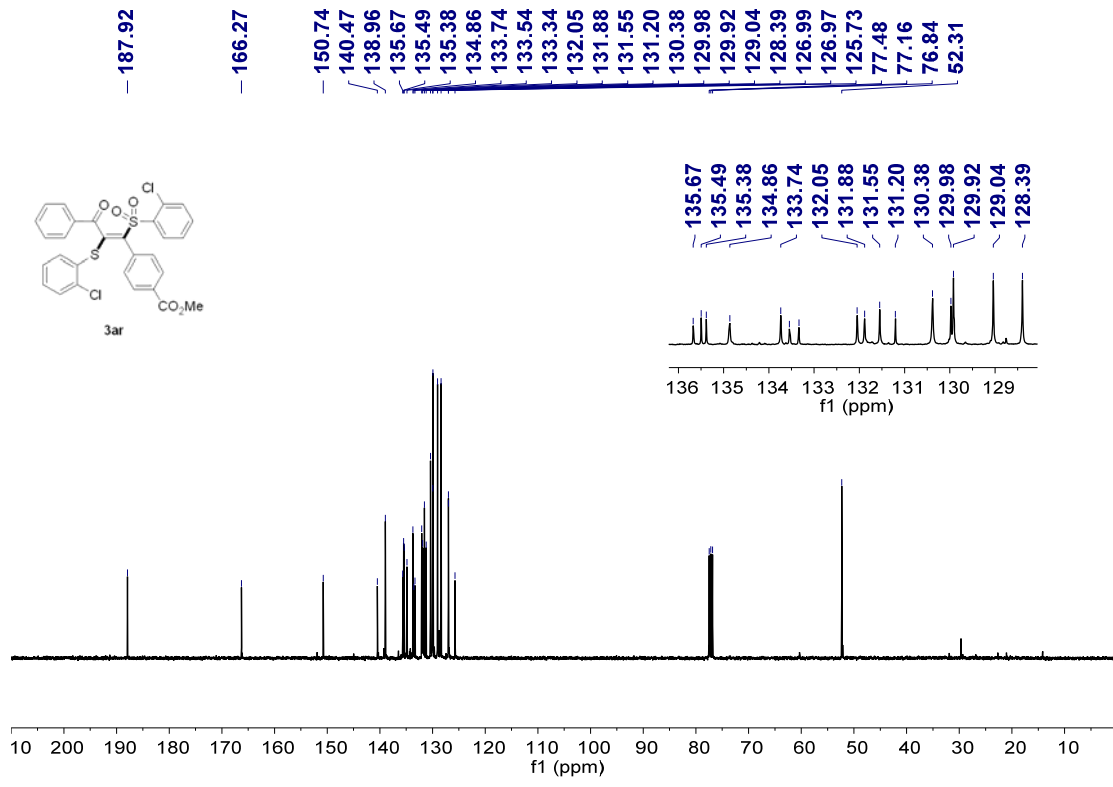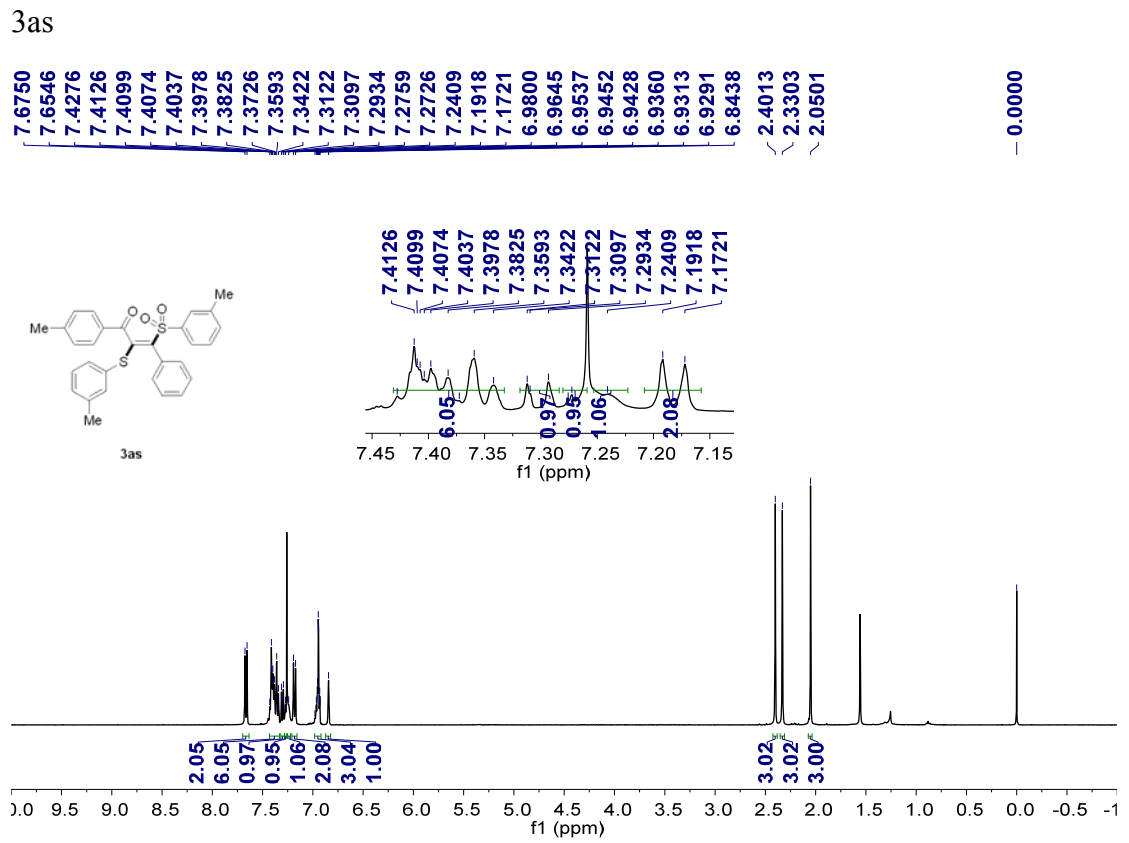

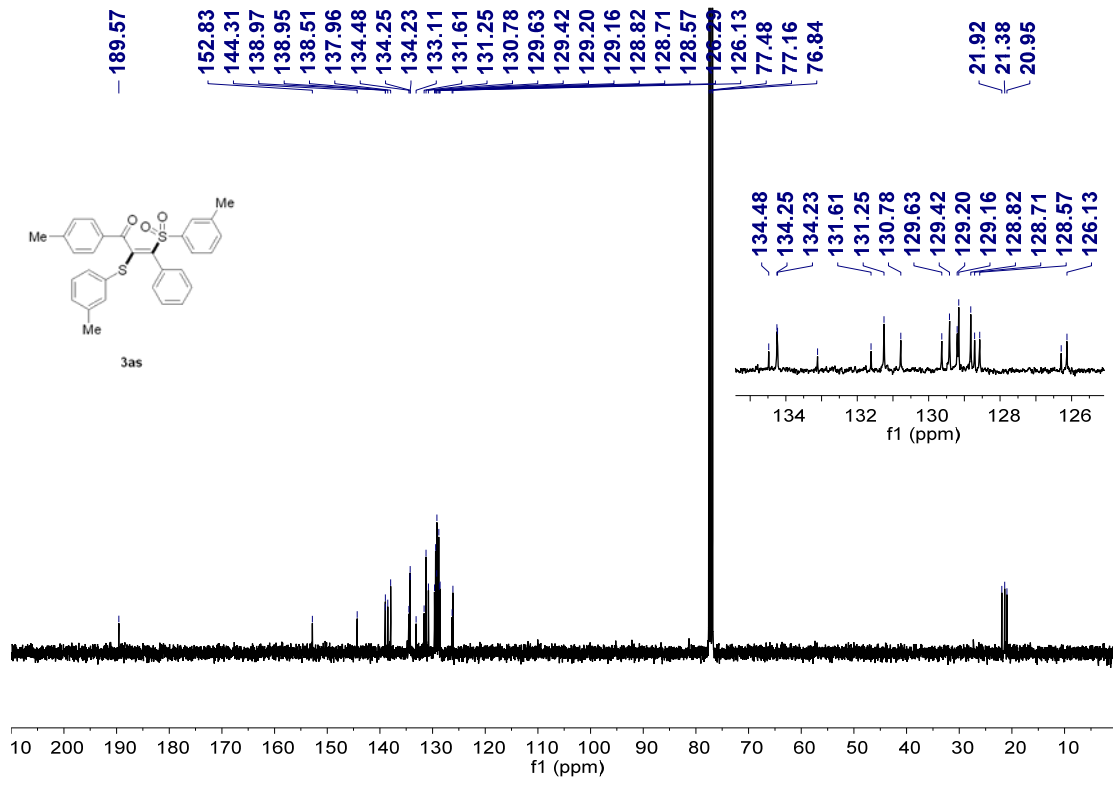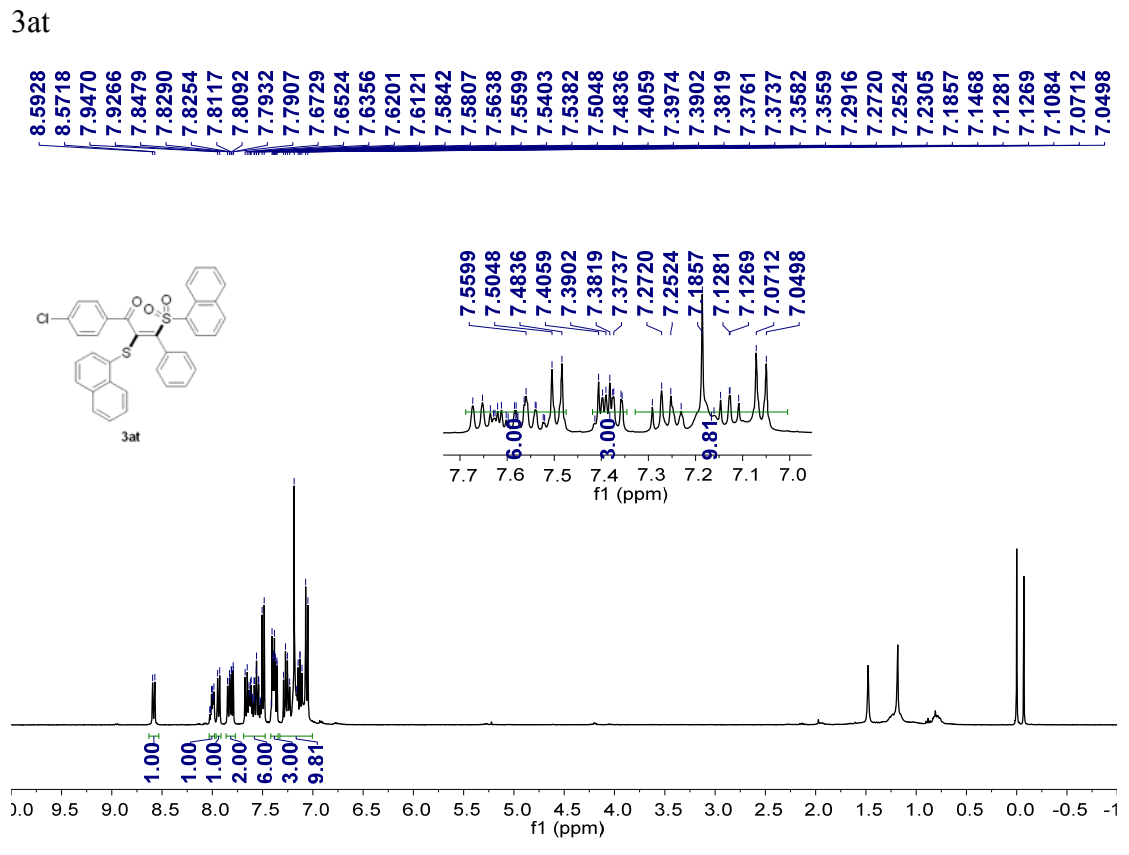

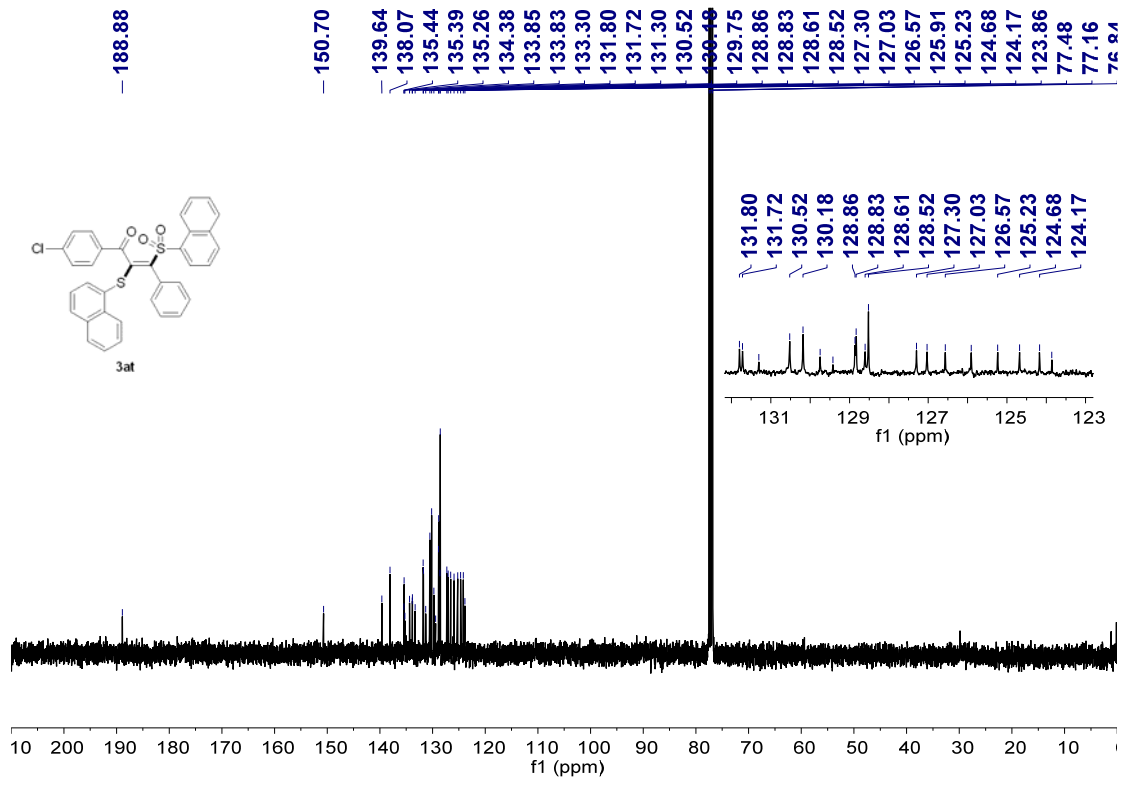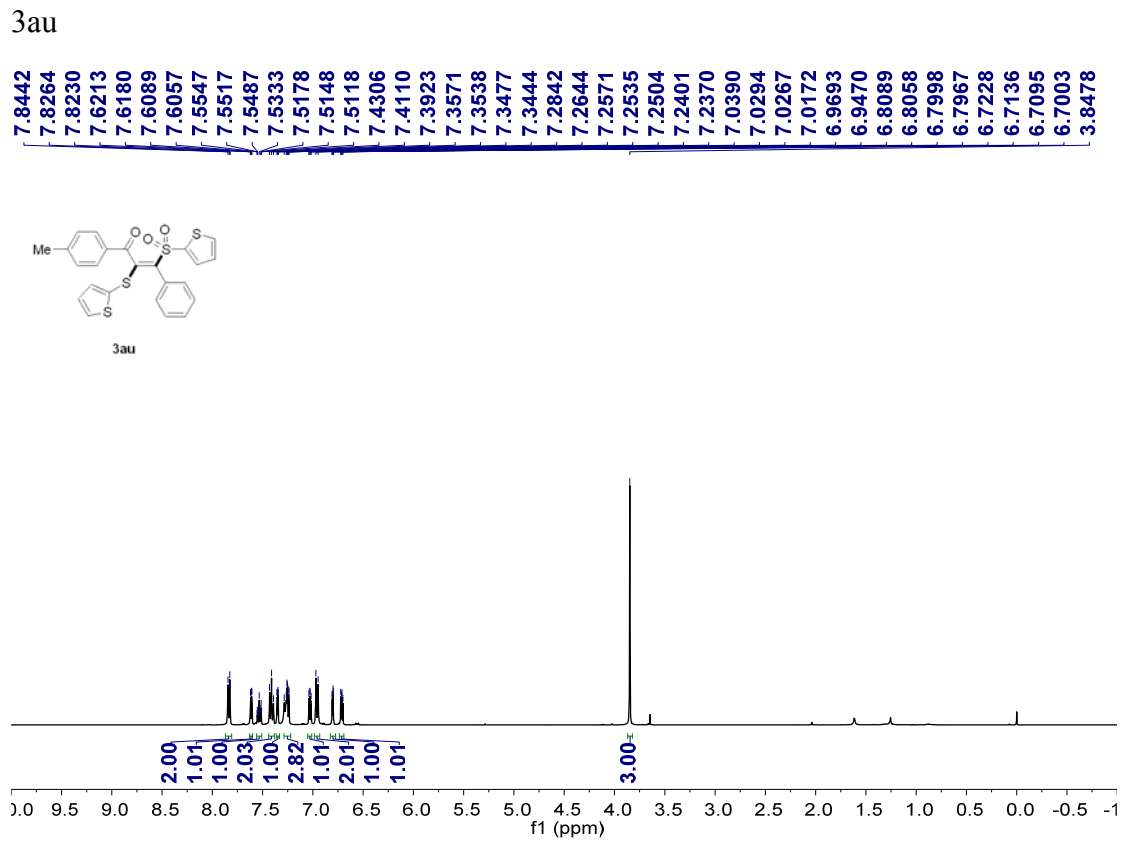

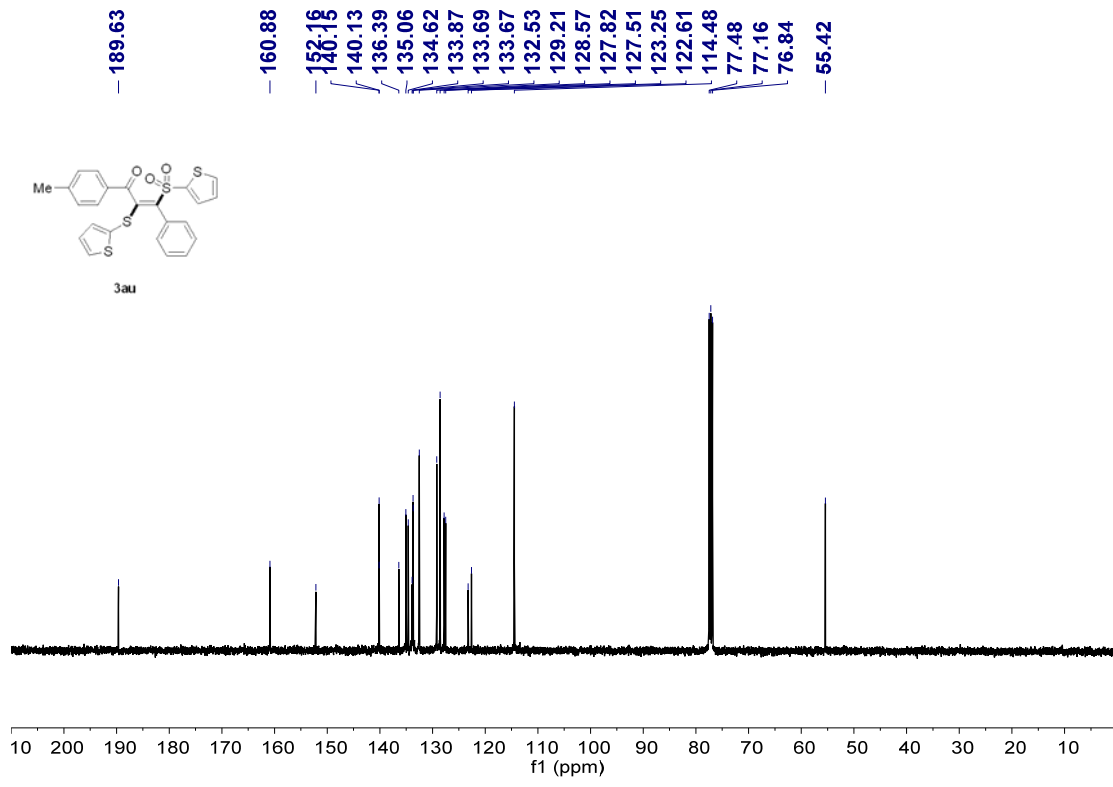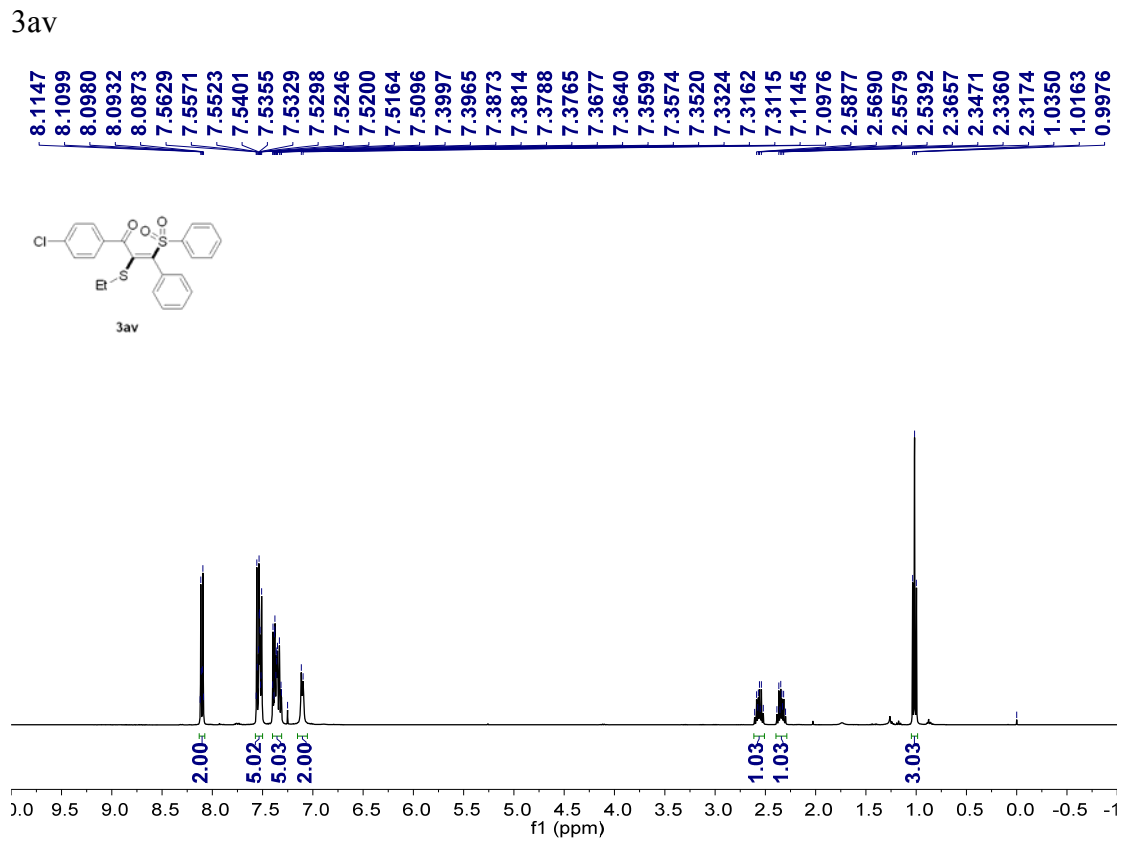



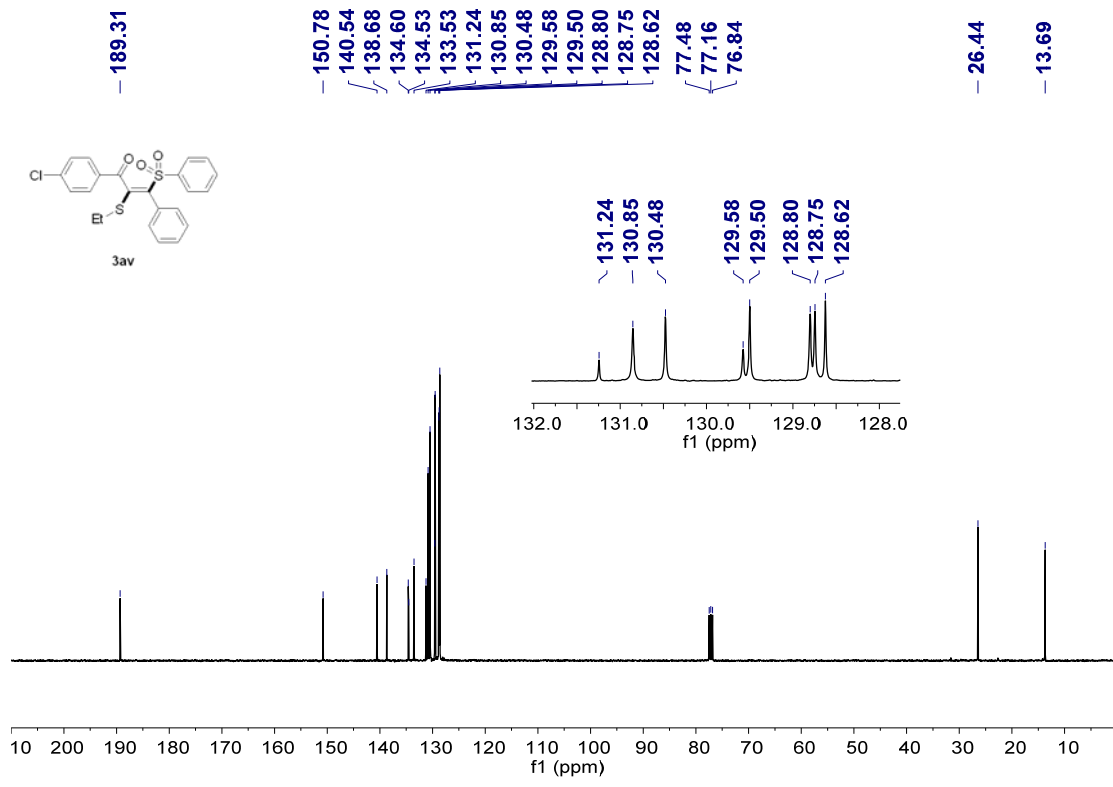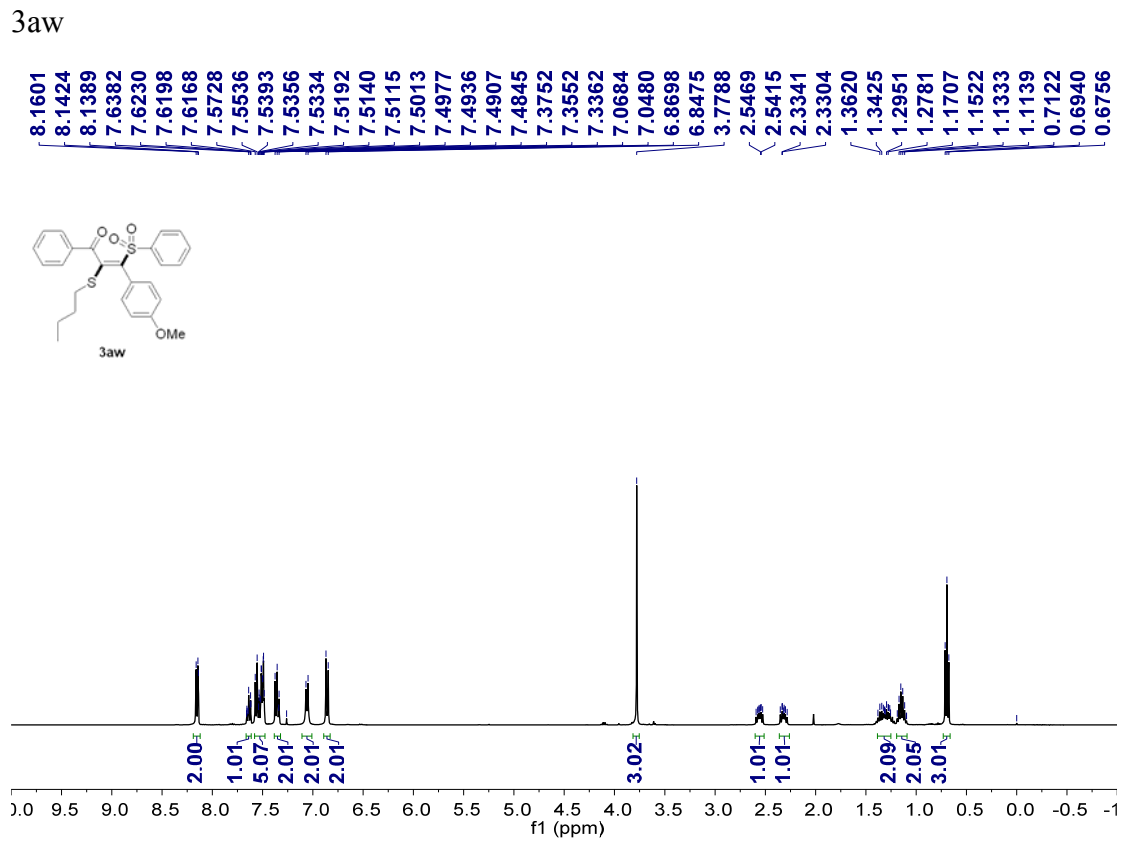

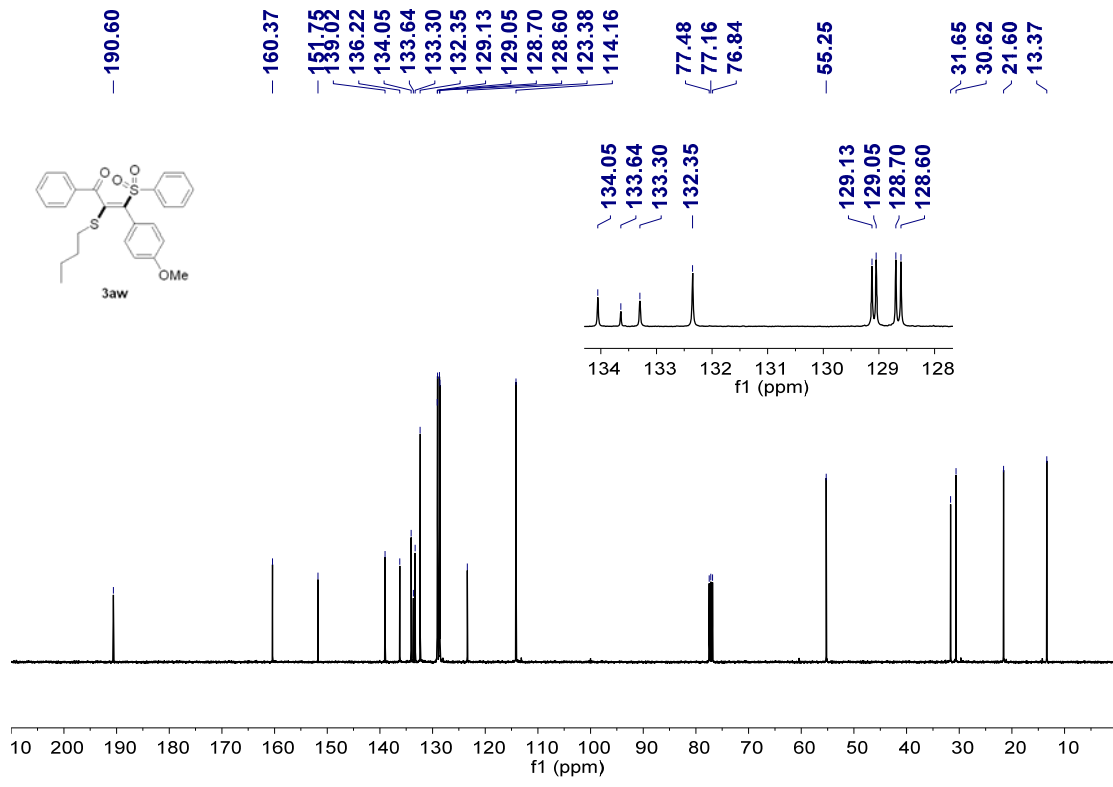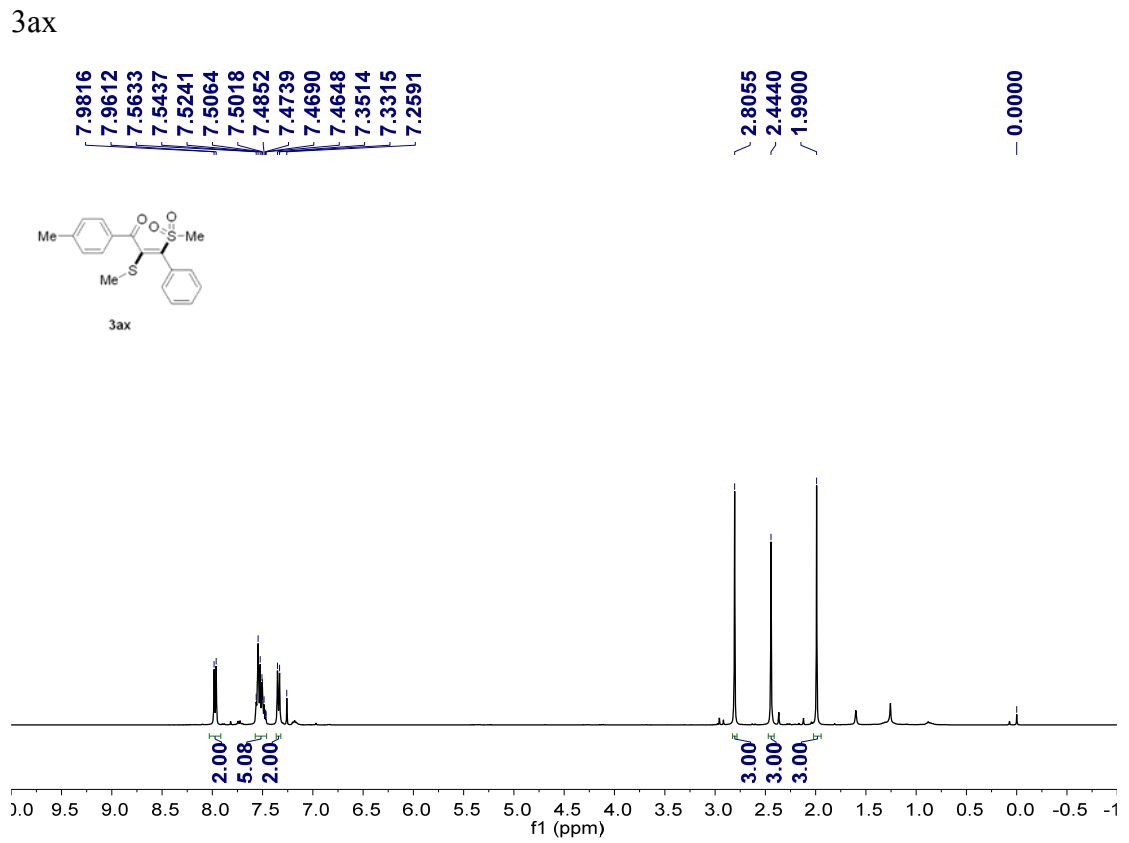

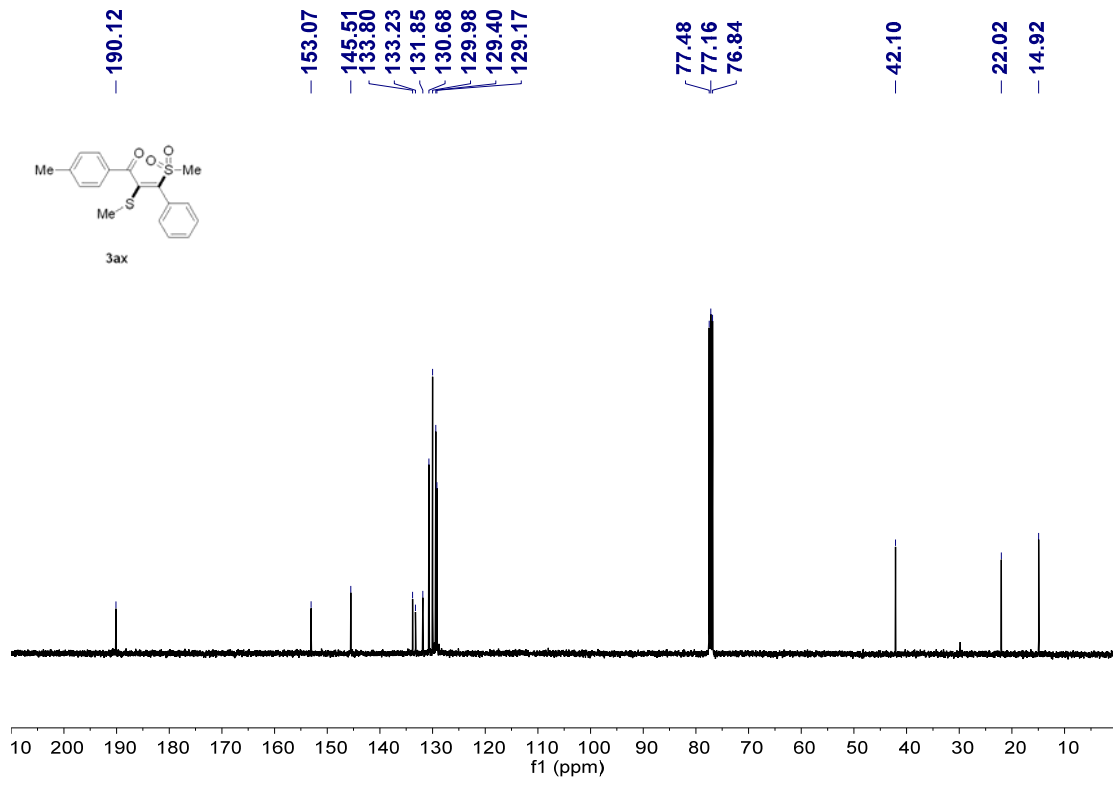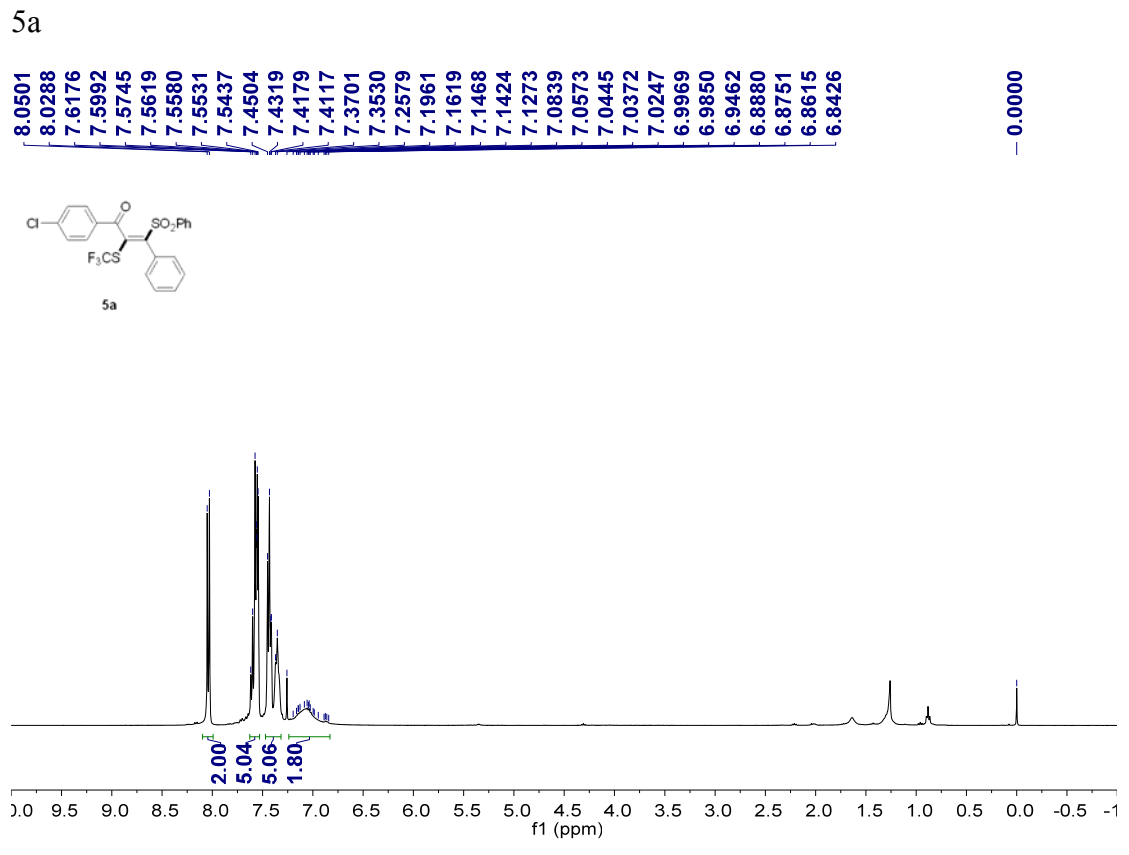

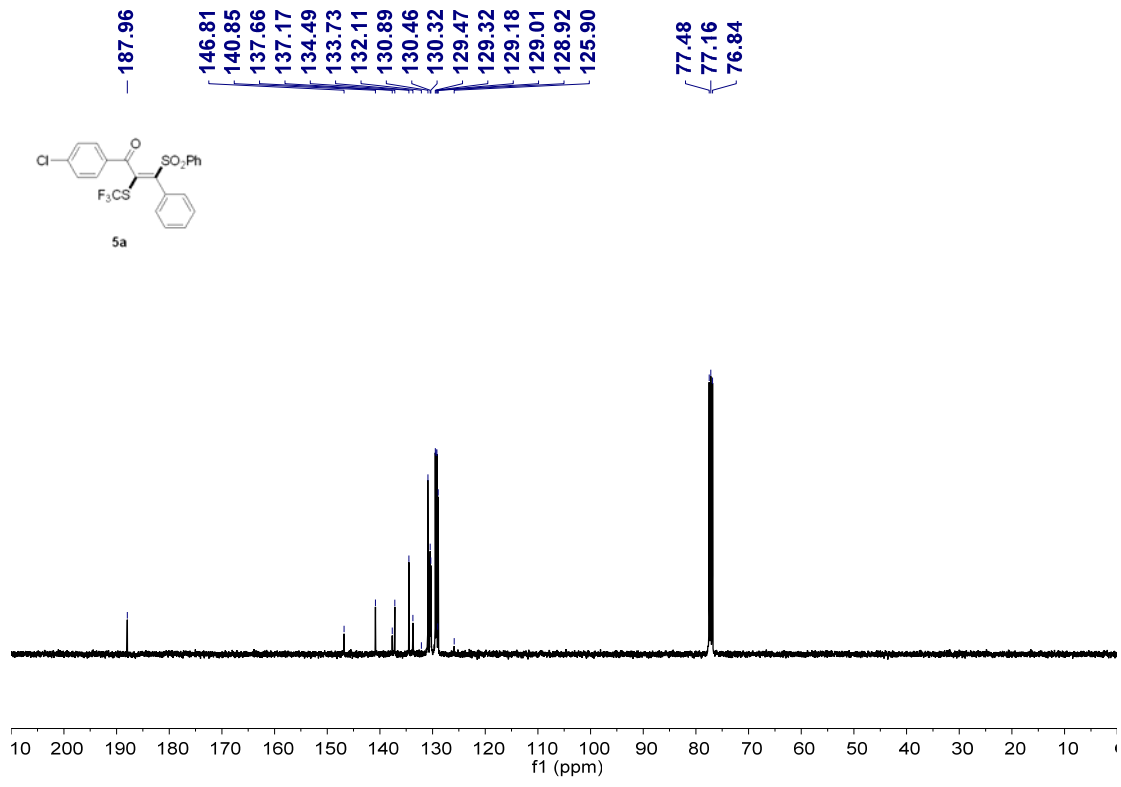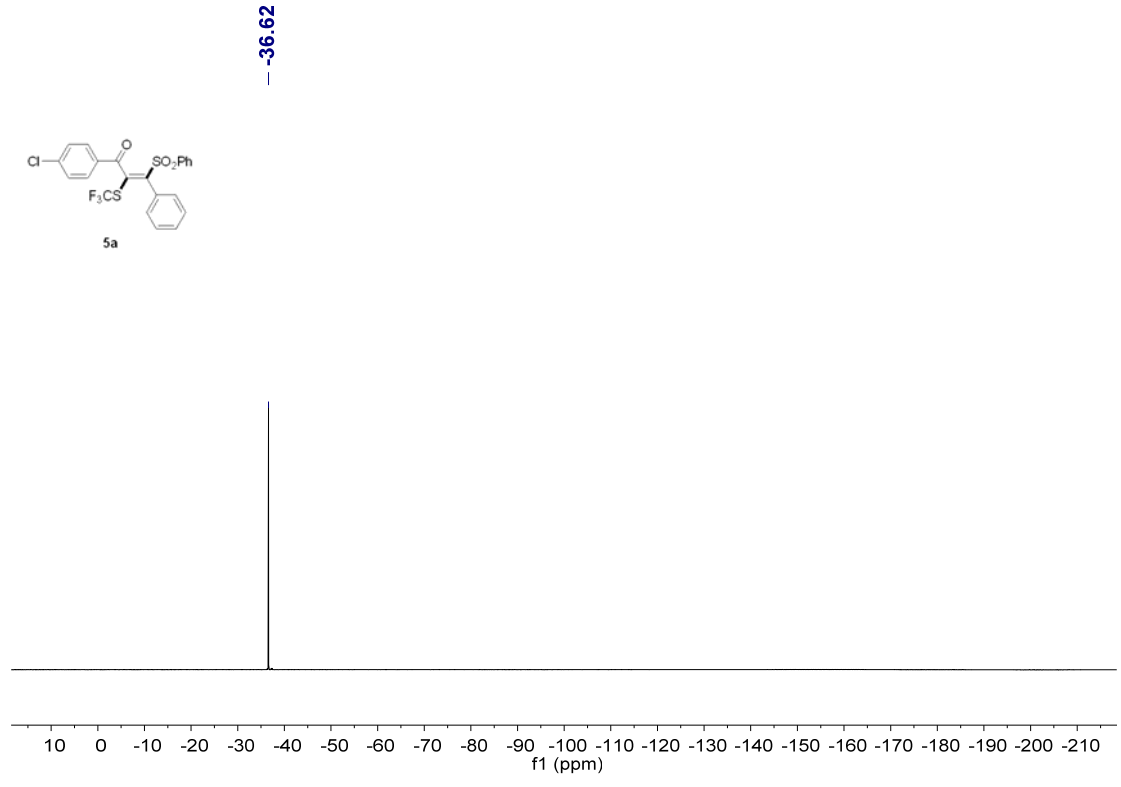

5b

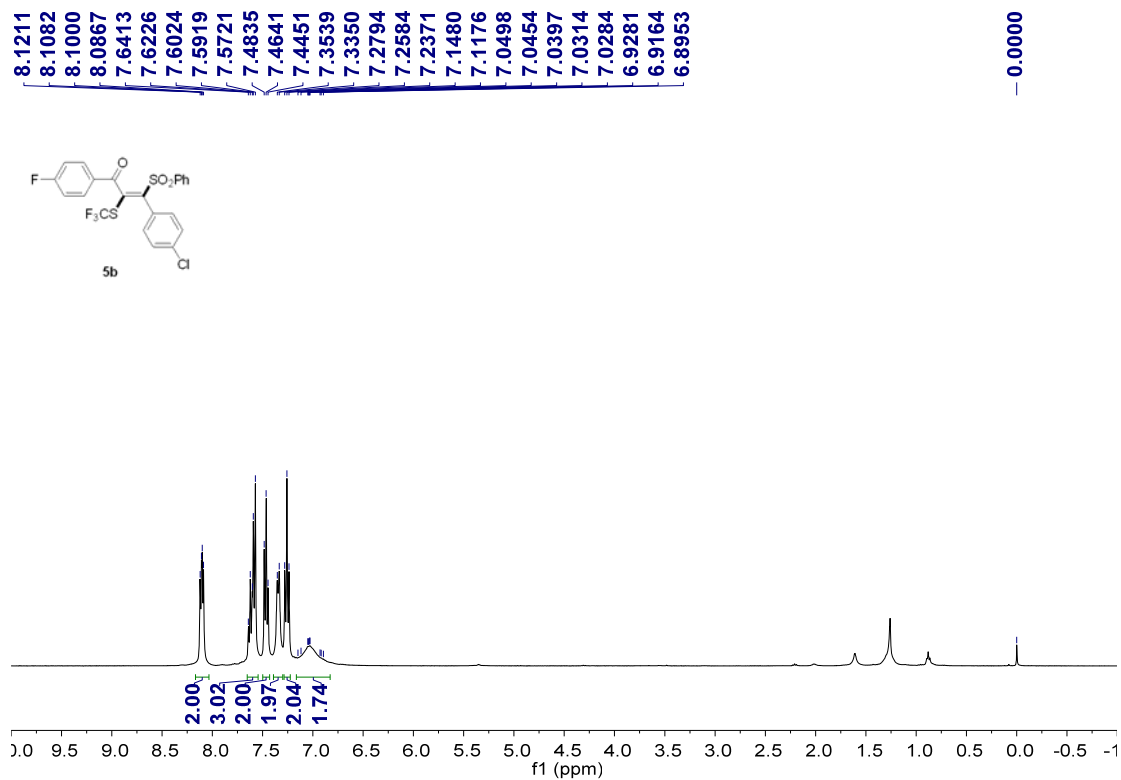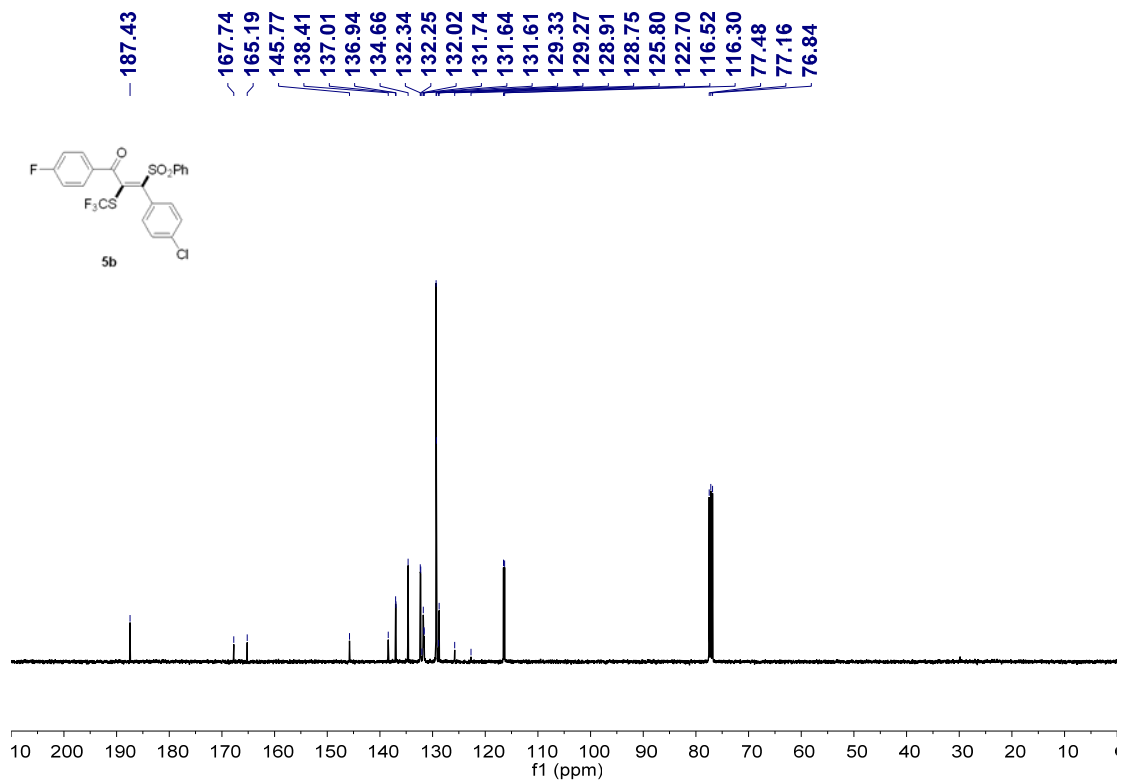

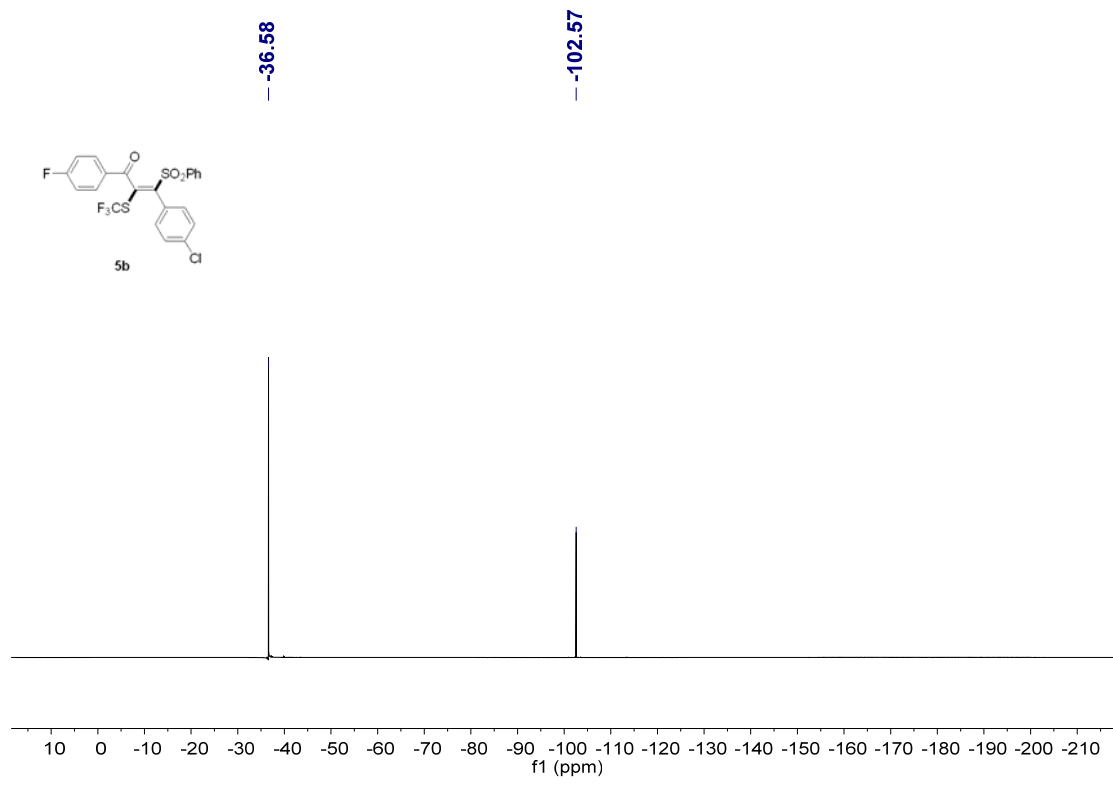

**5c**

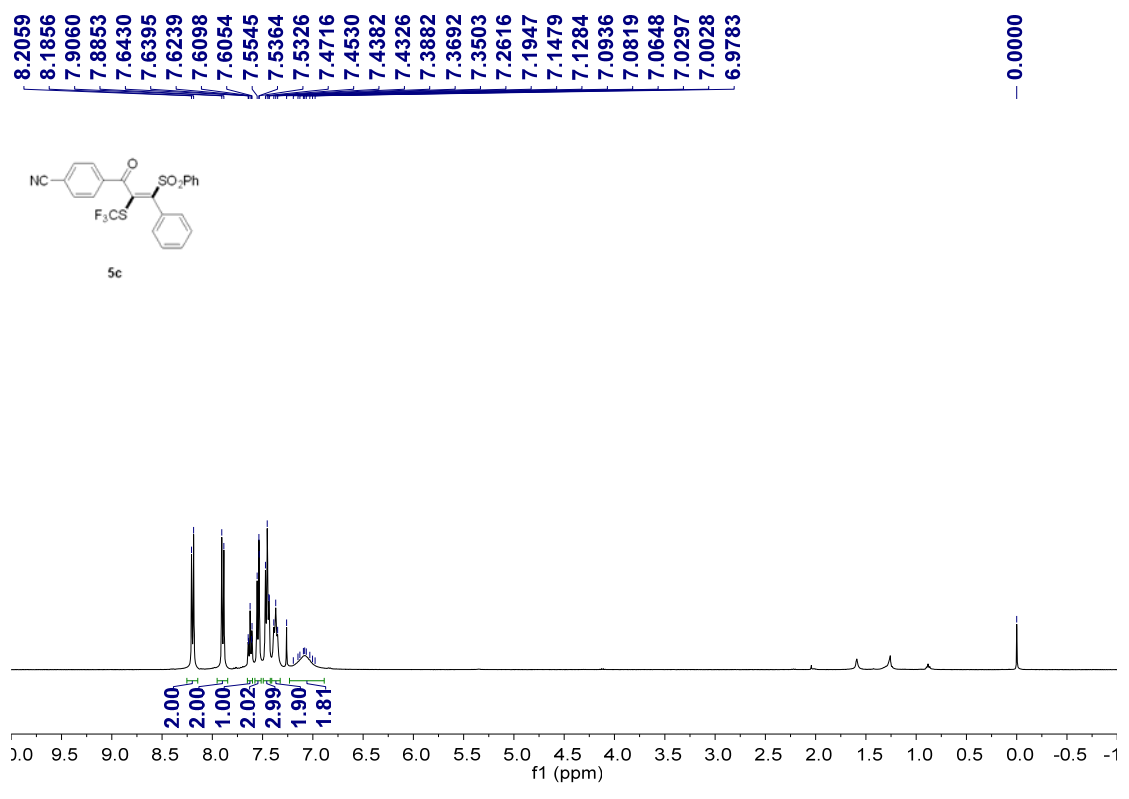

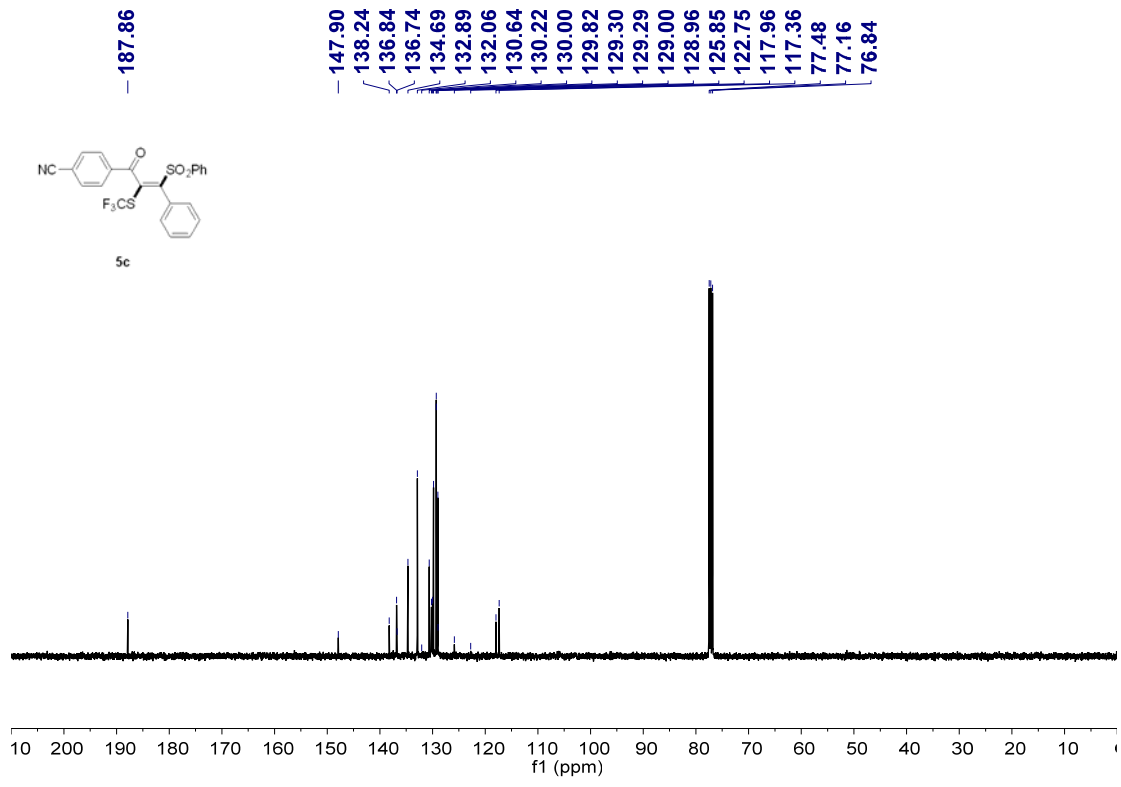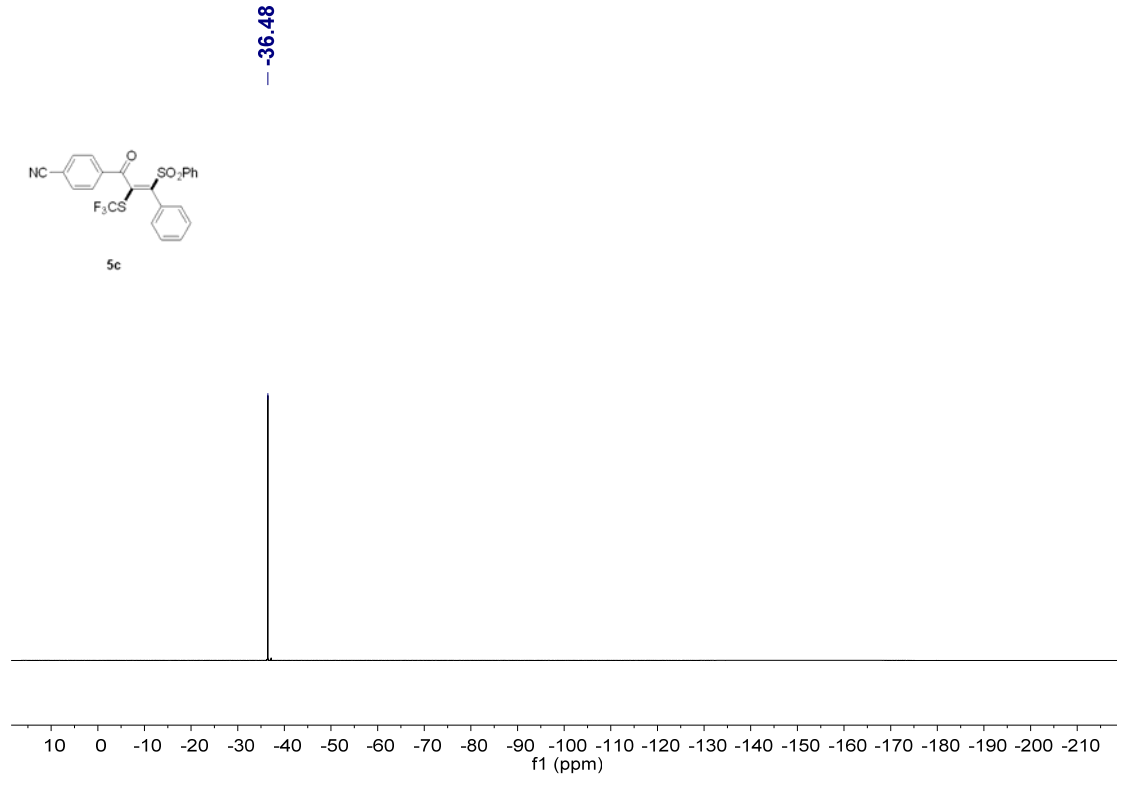

5d

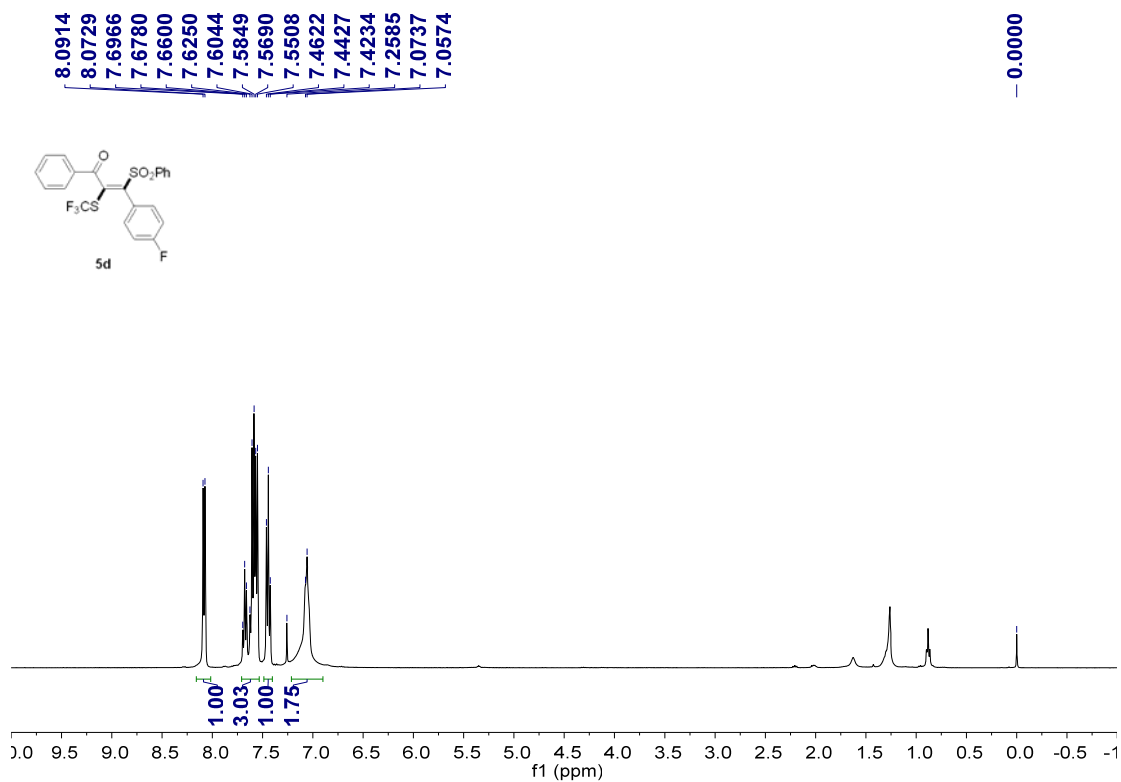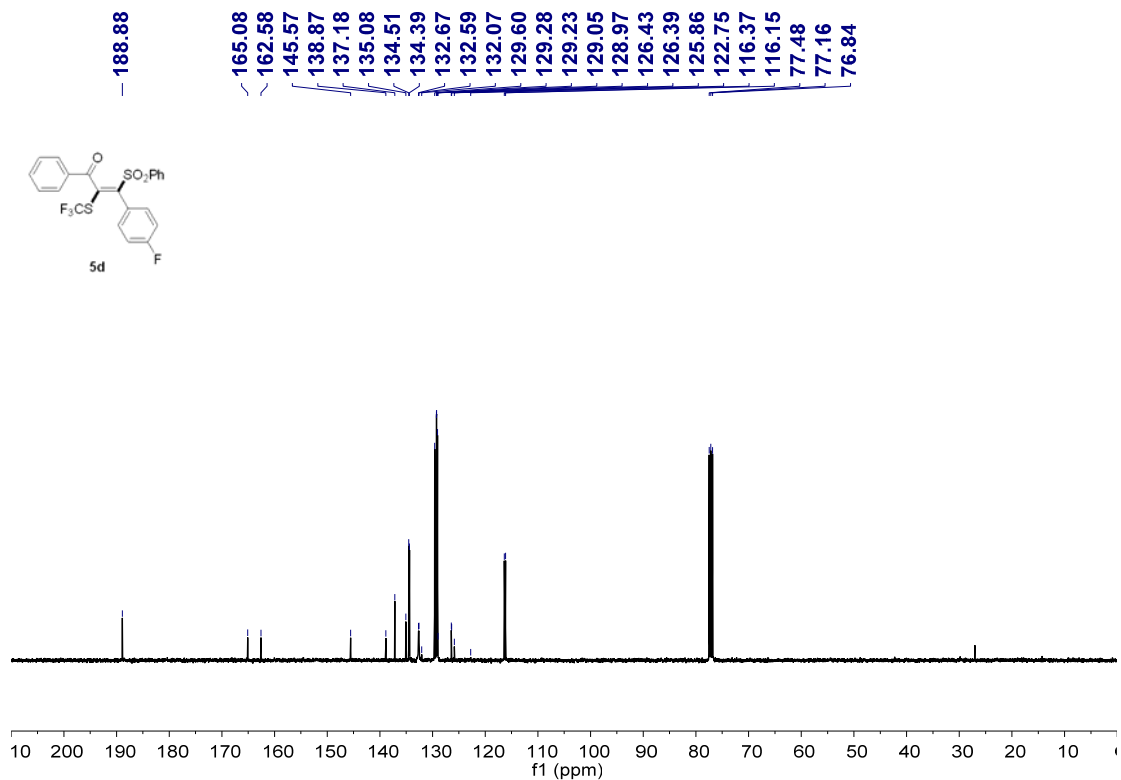



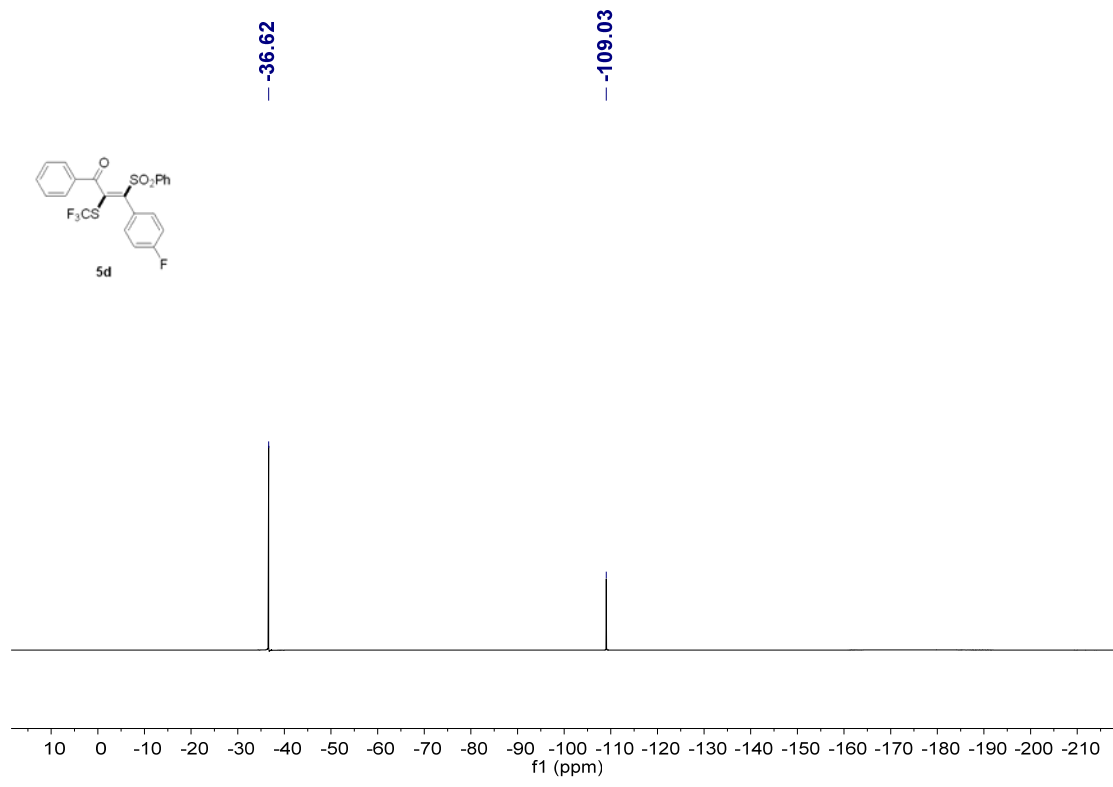

**5e**

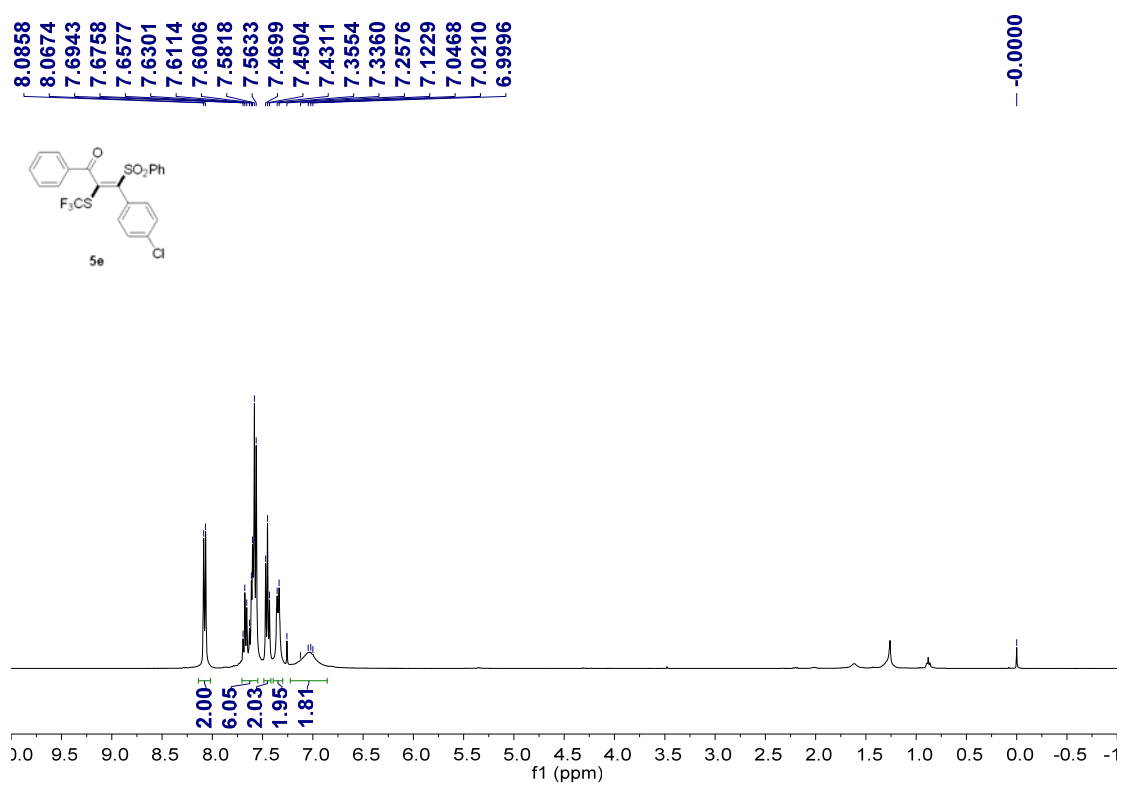

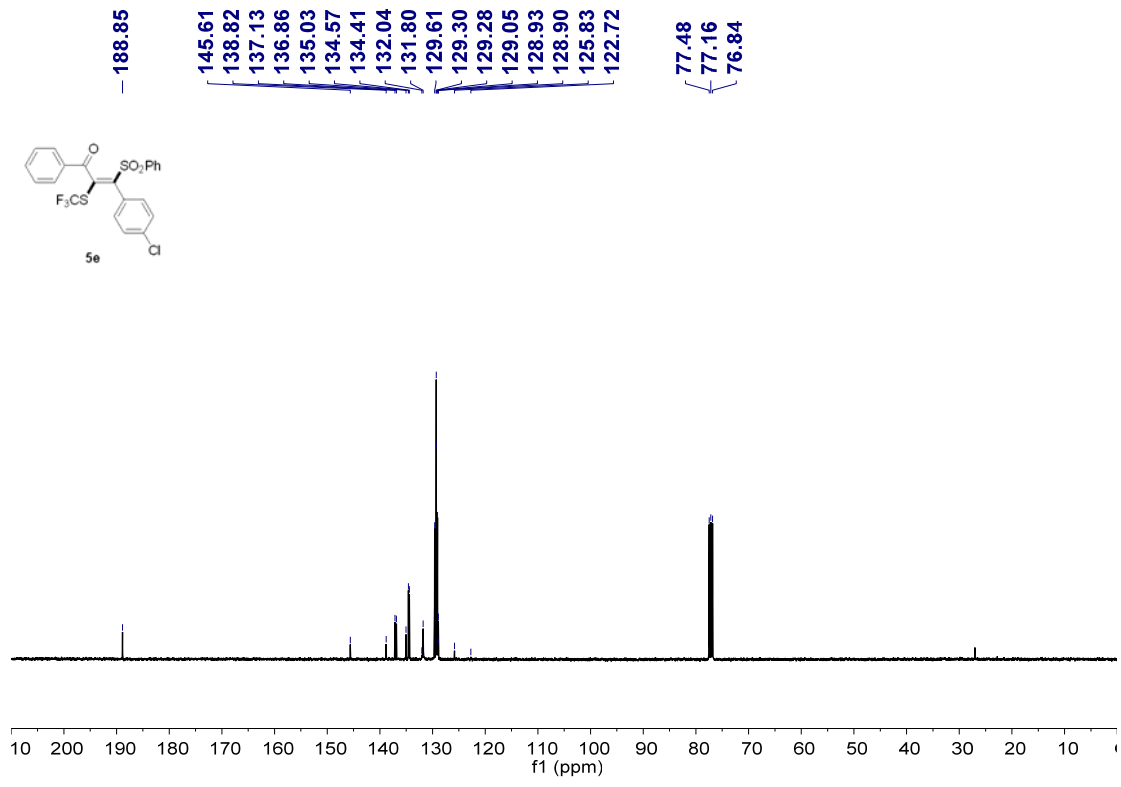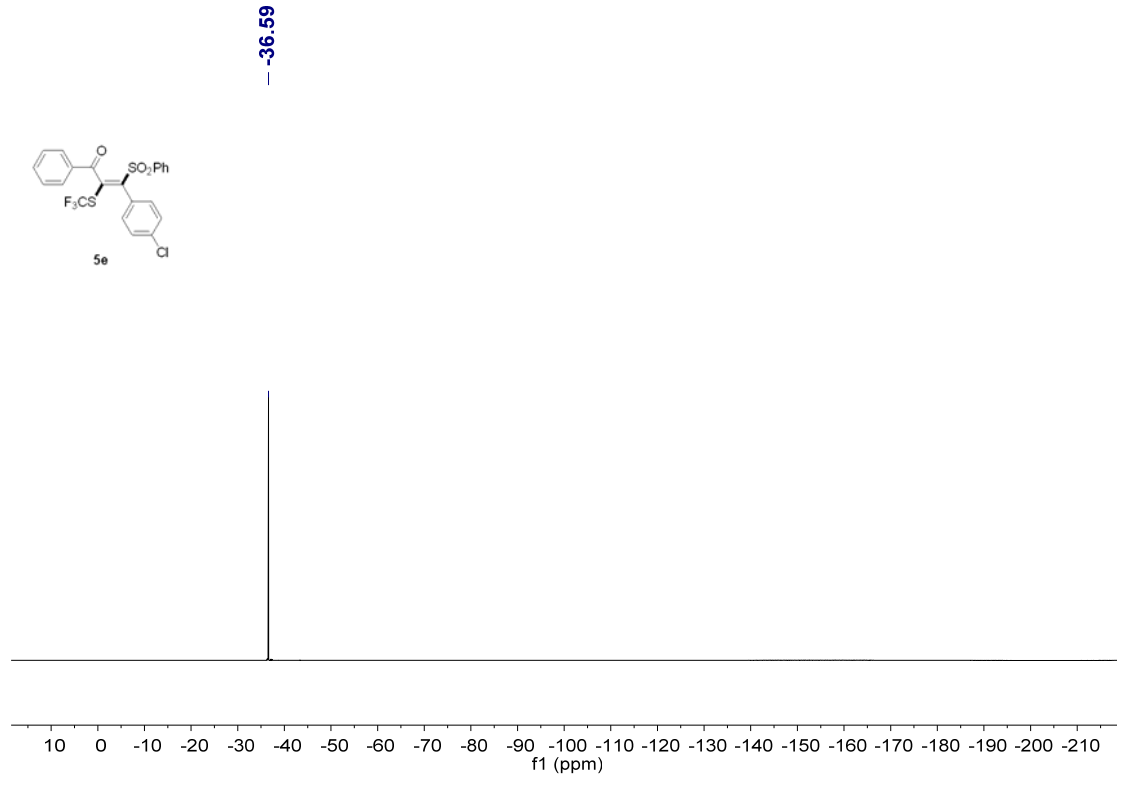

5f

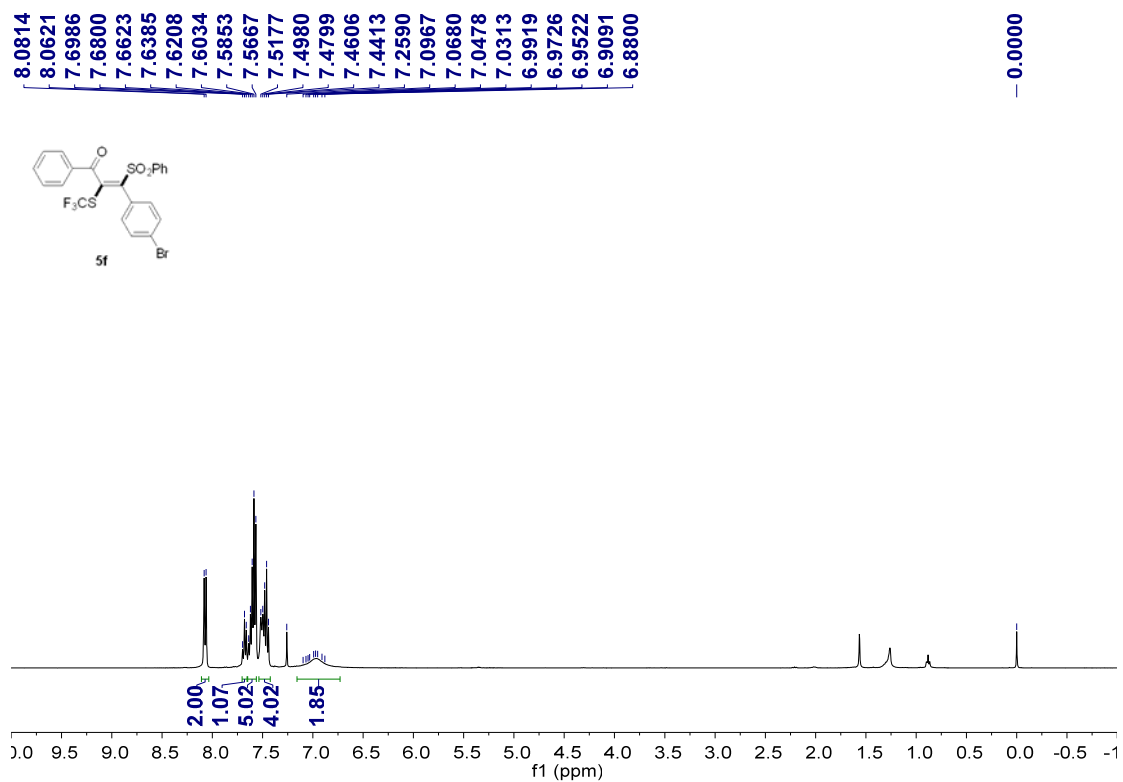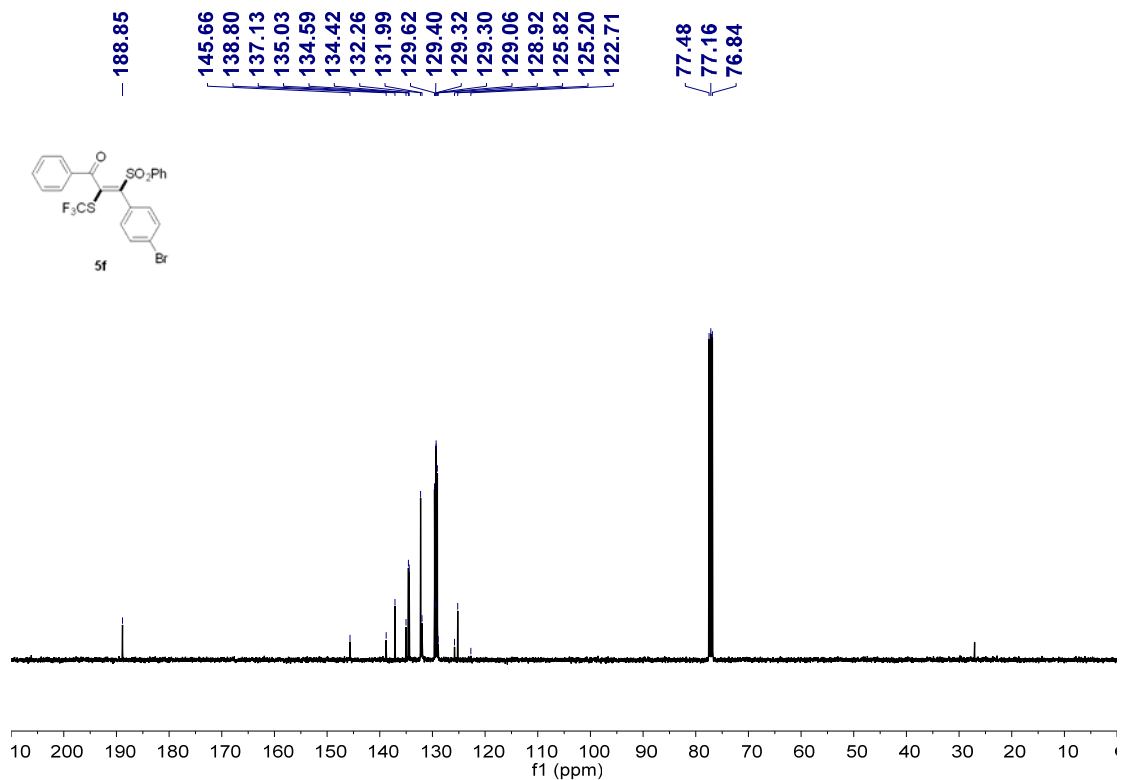

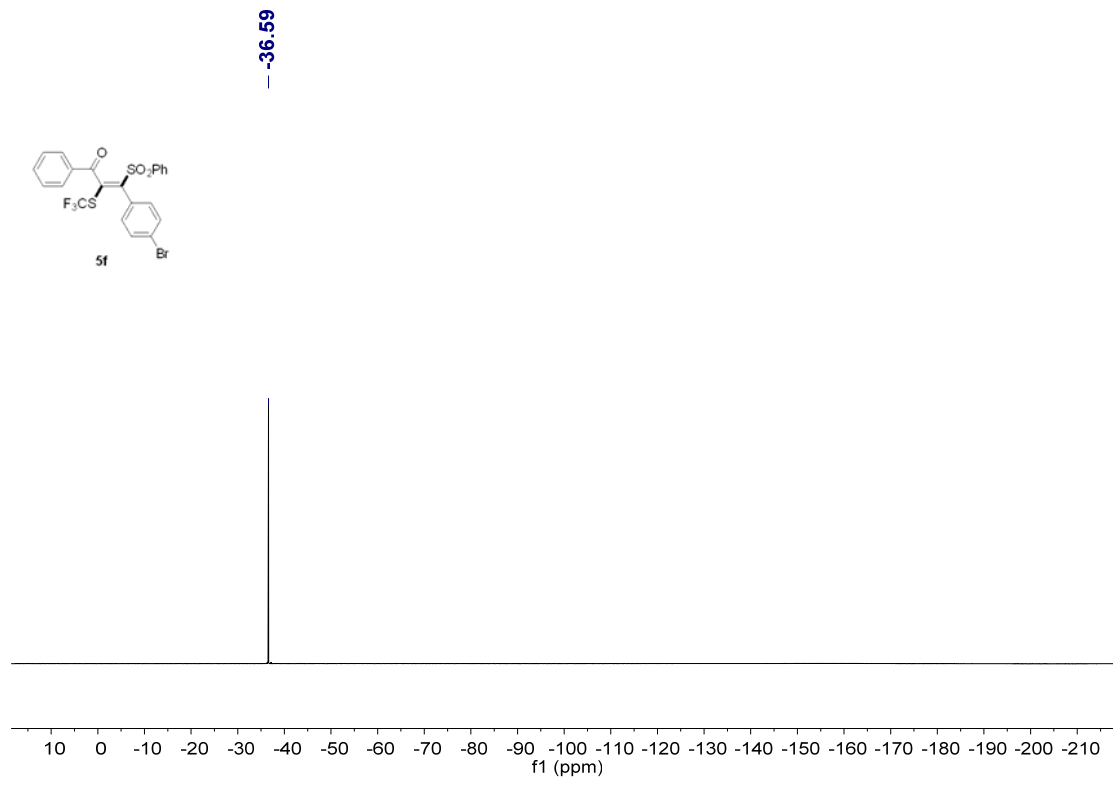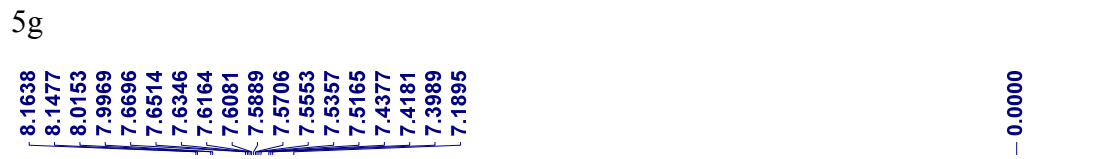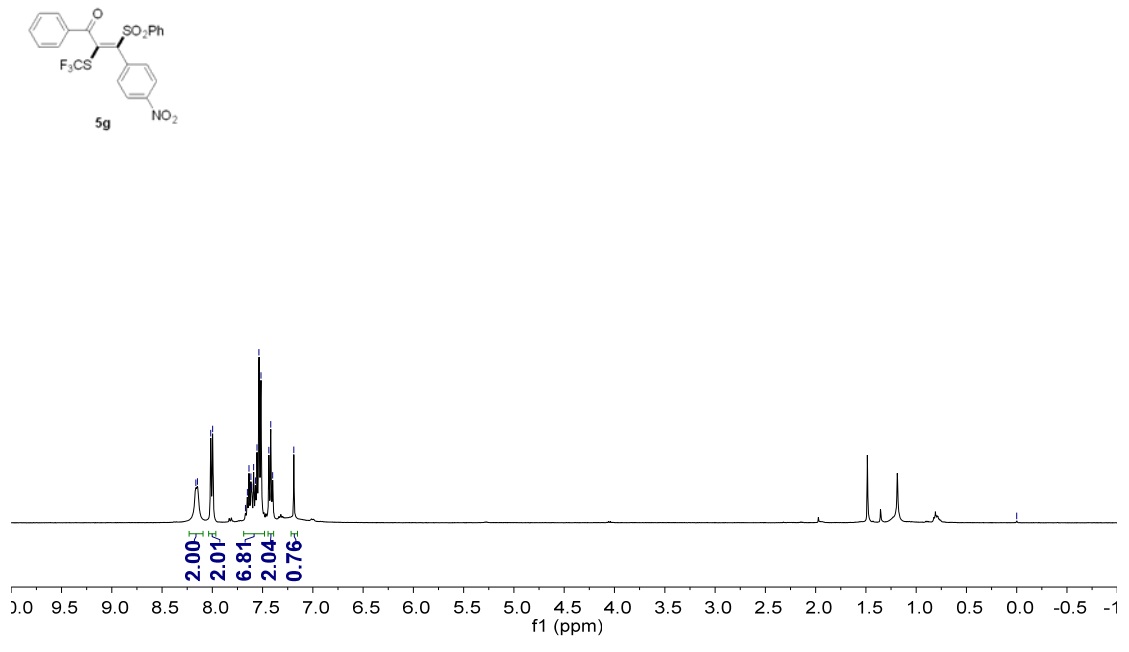

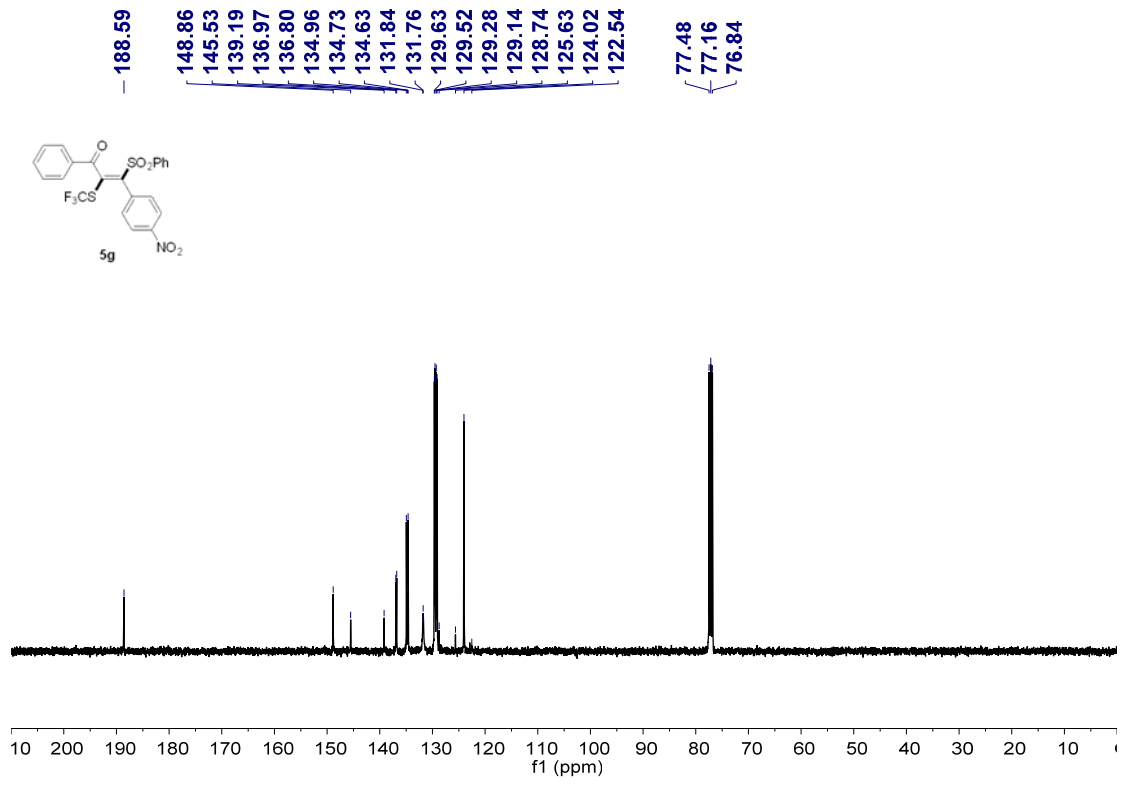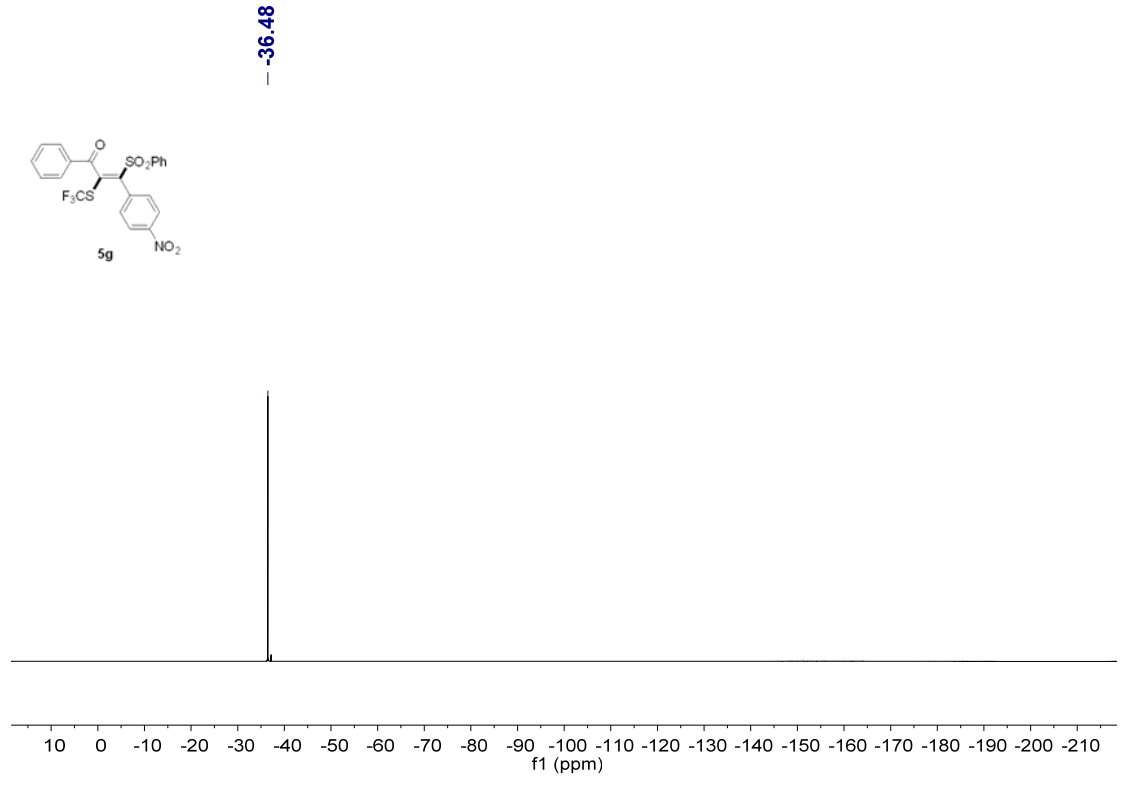

5h

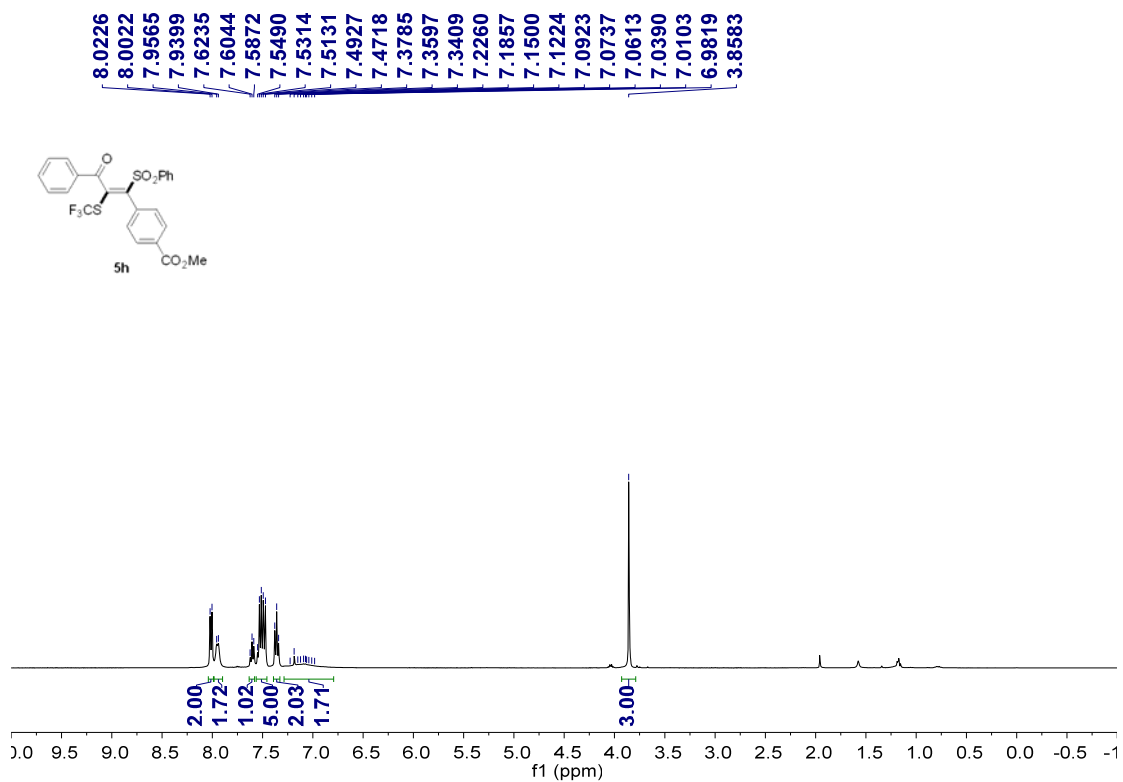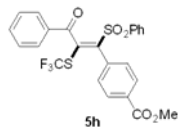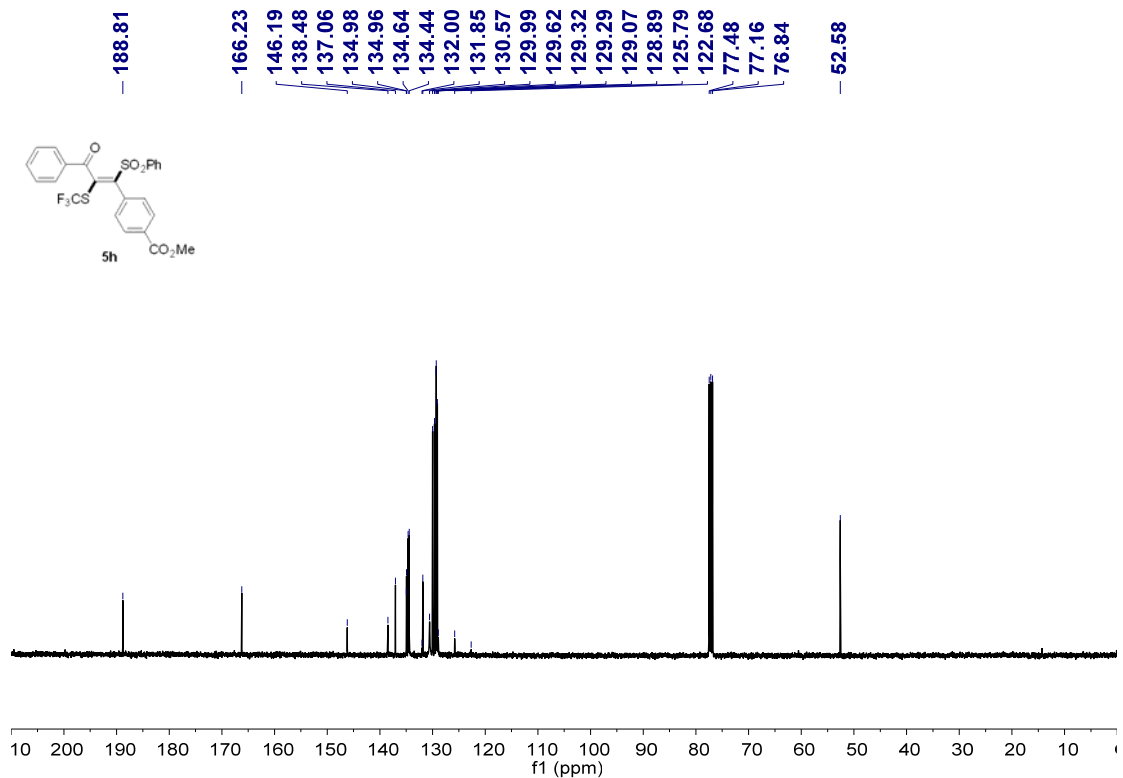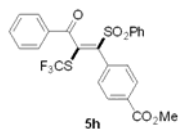

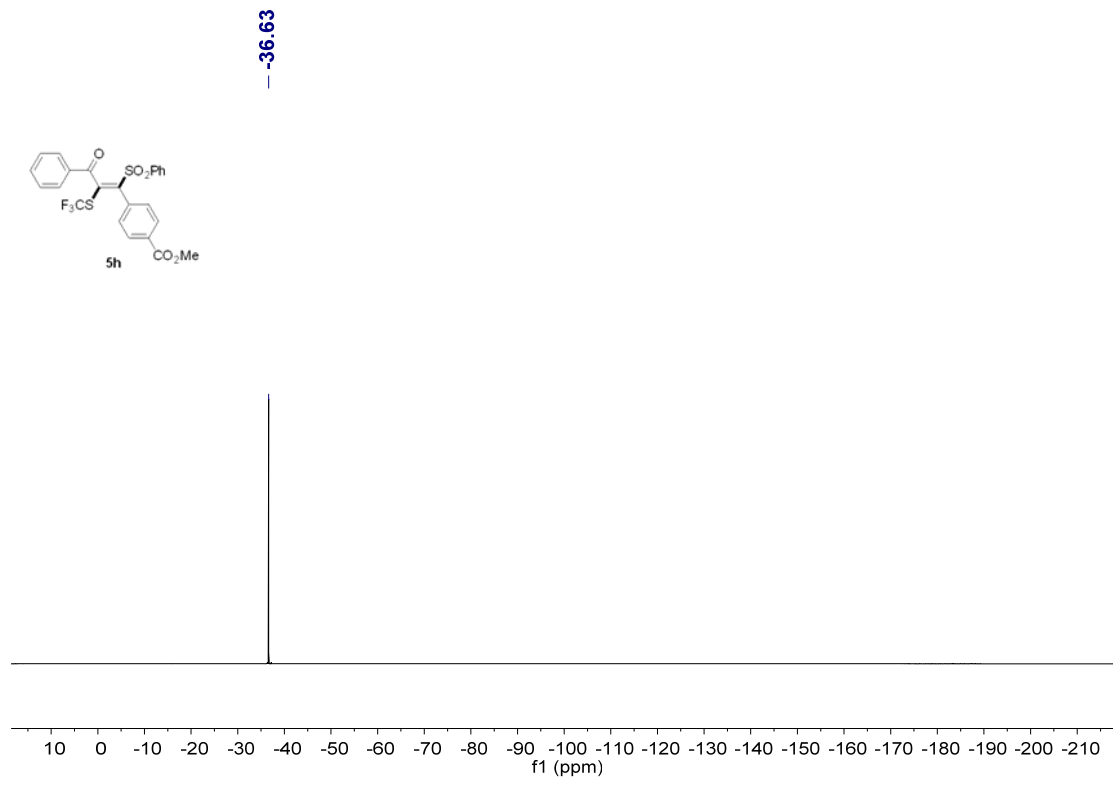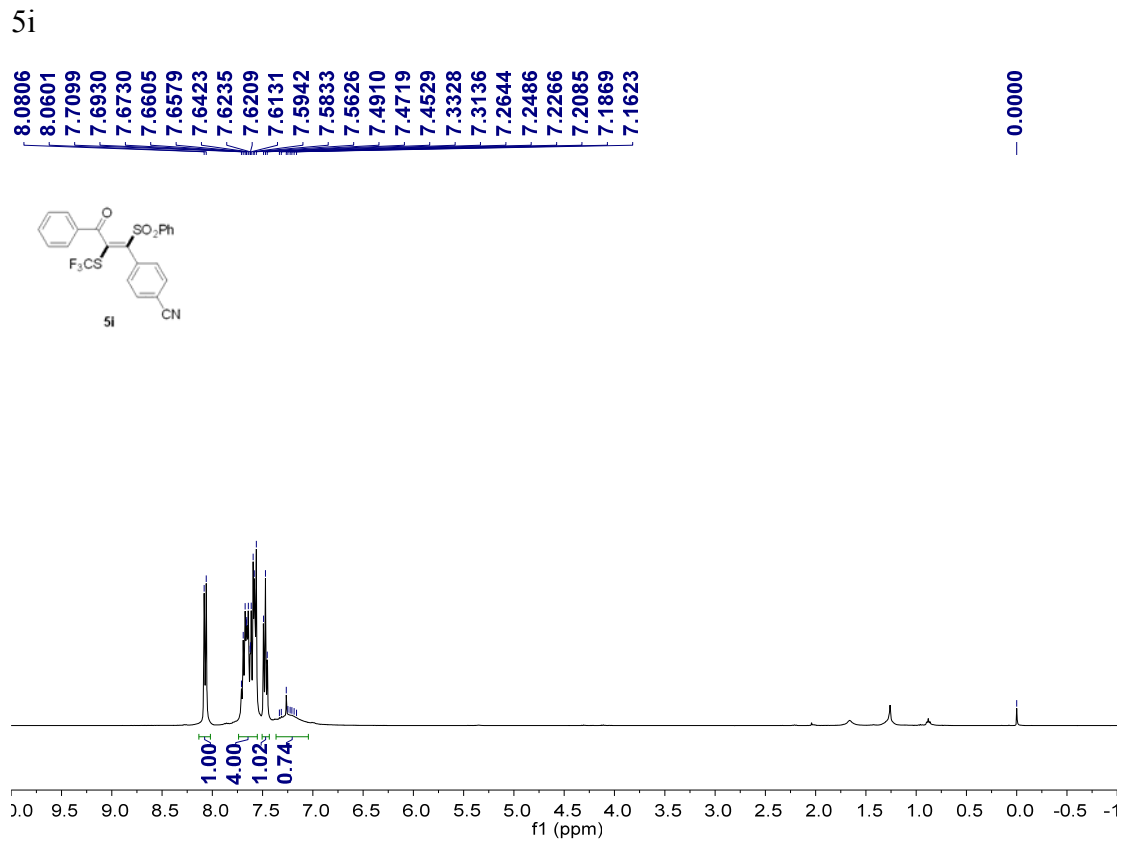

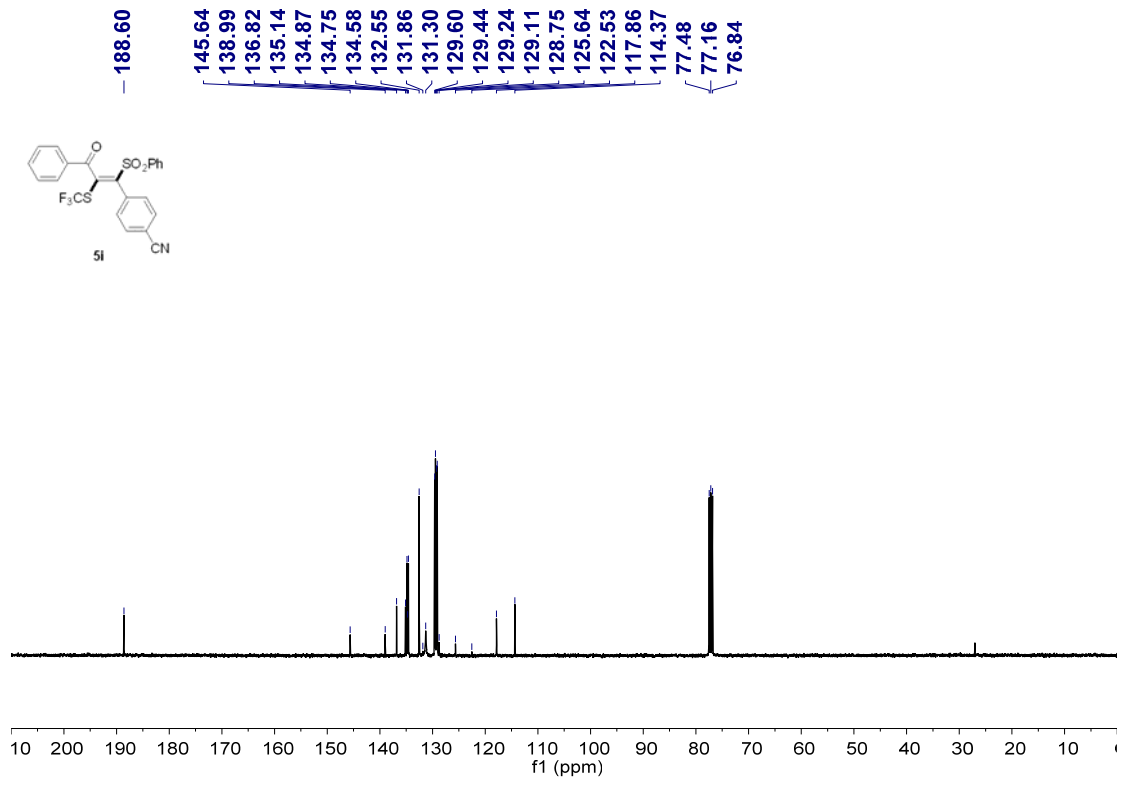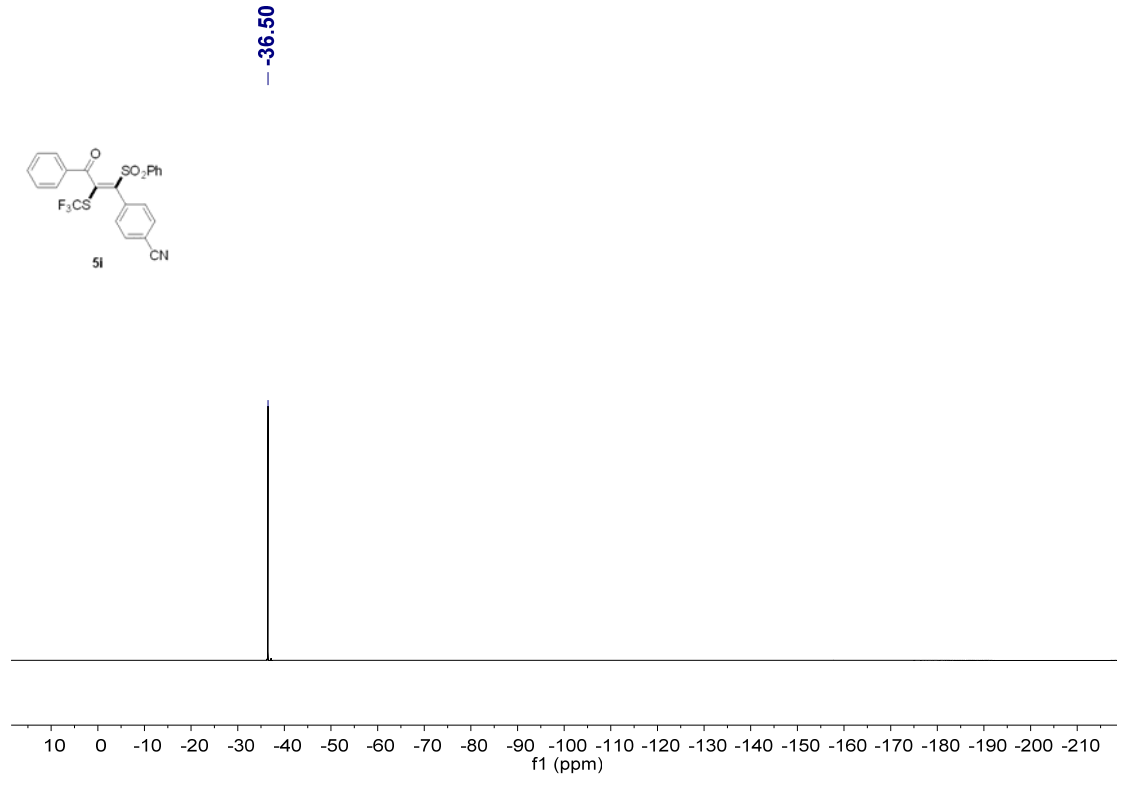



5j

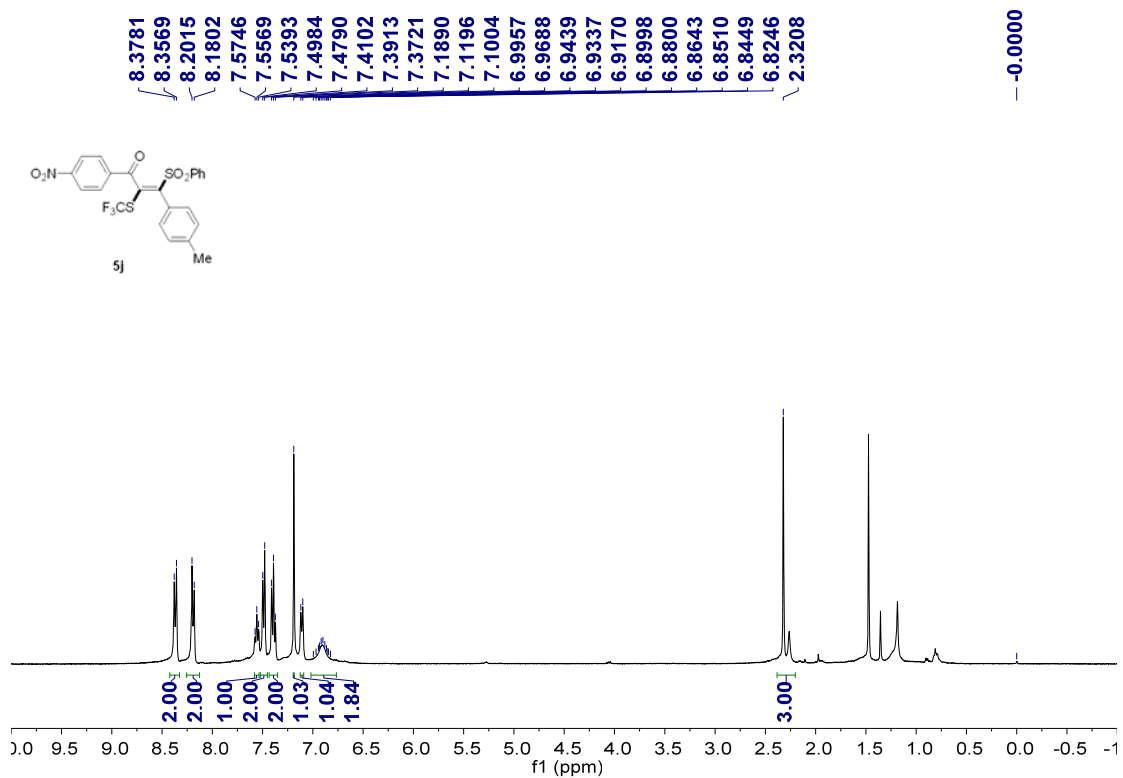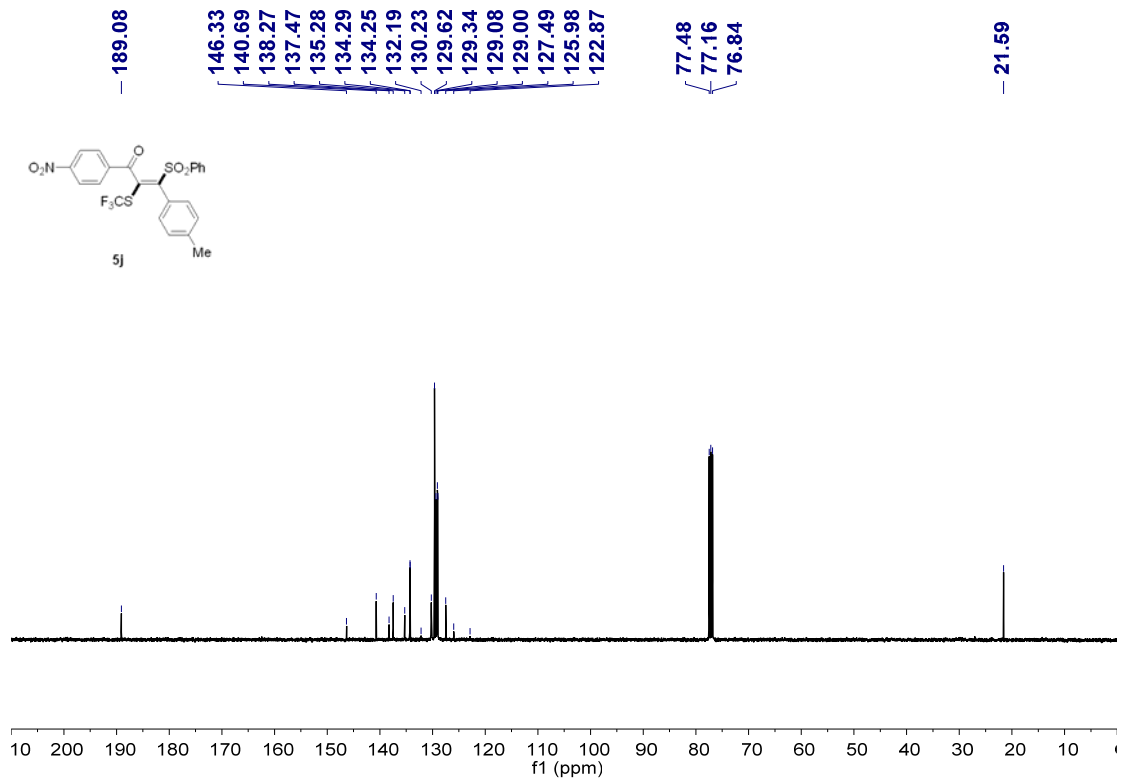

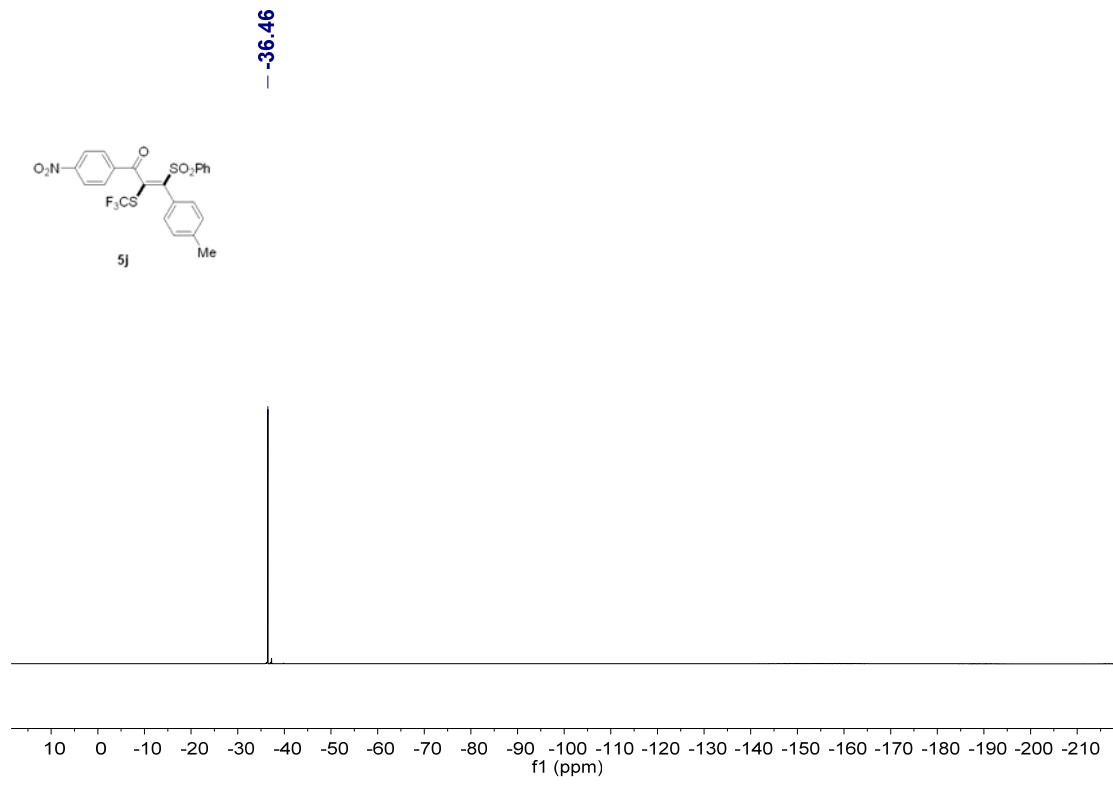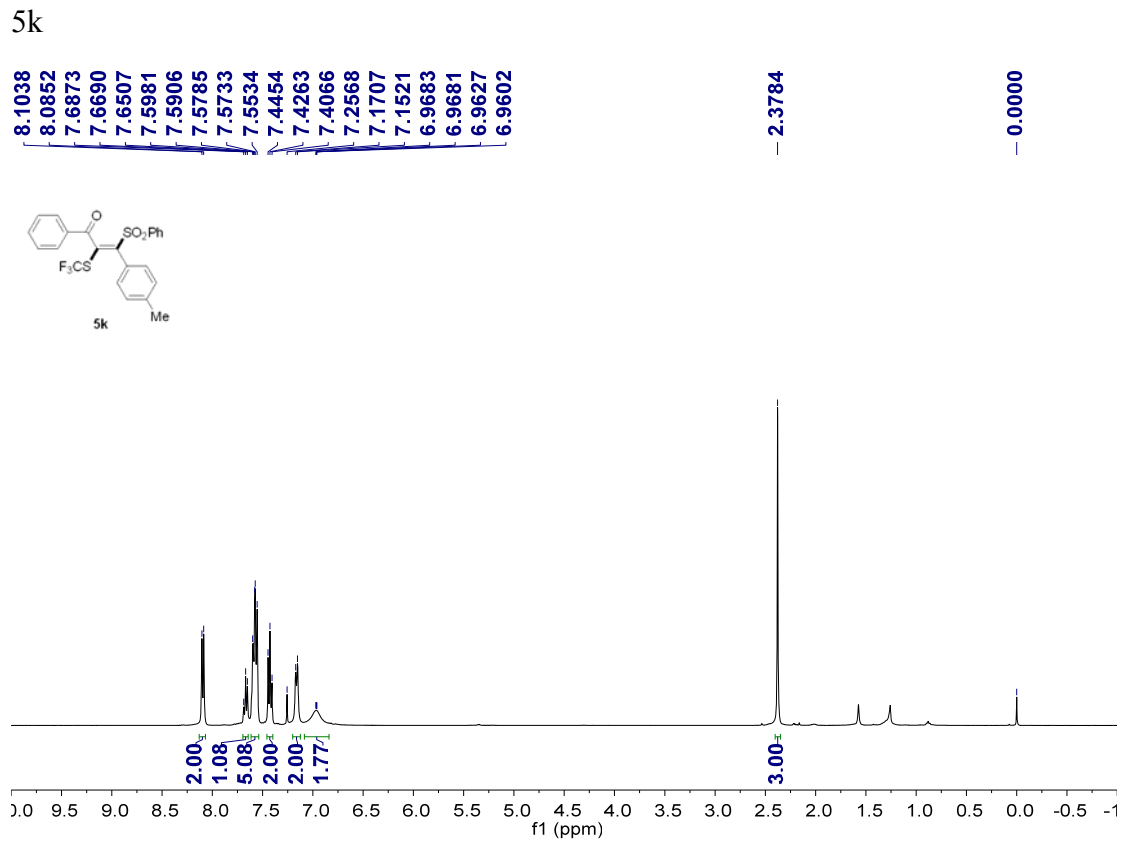

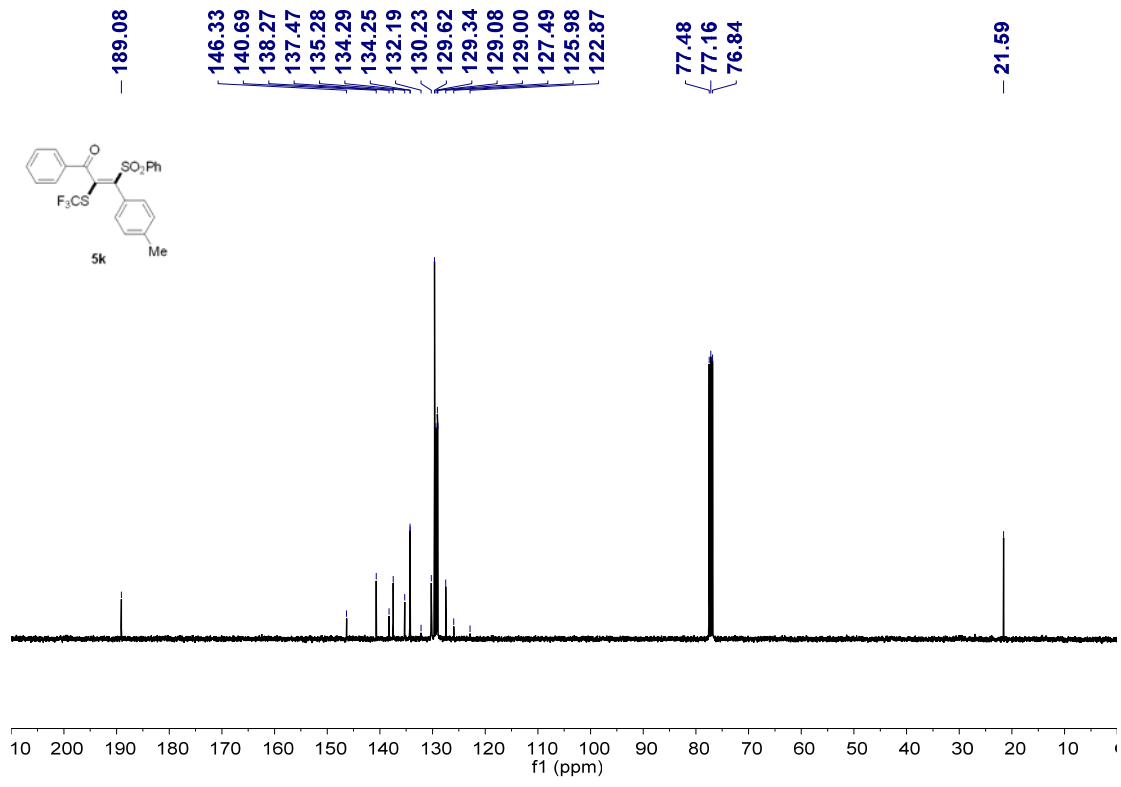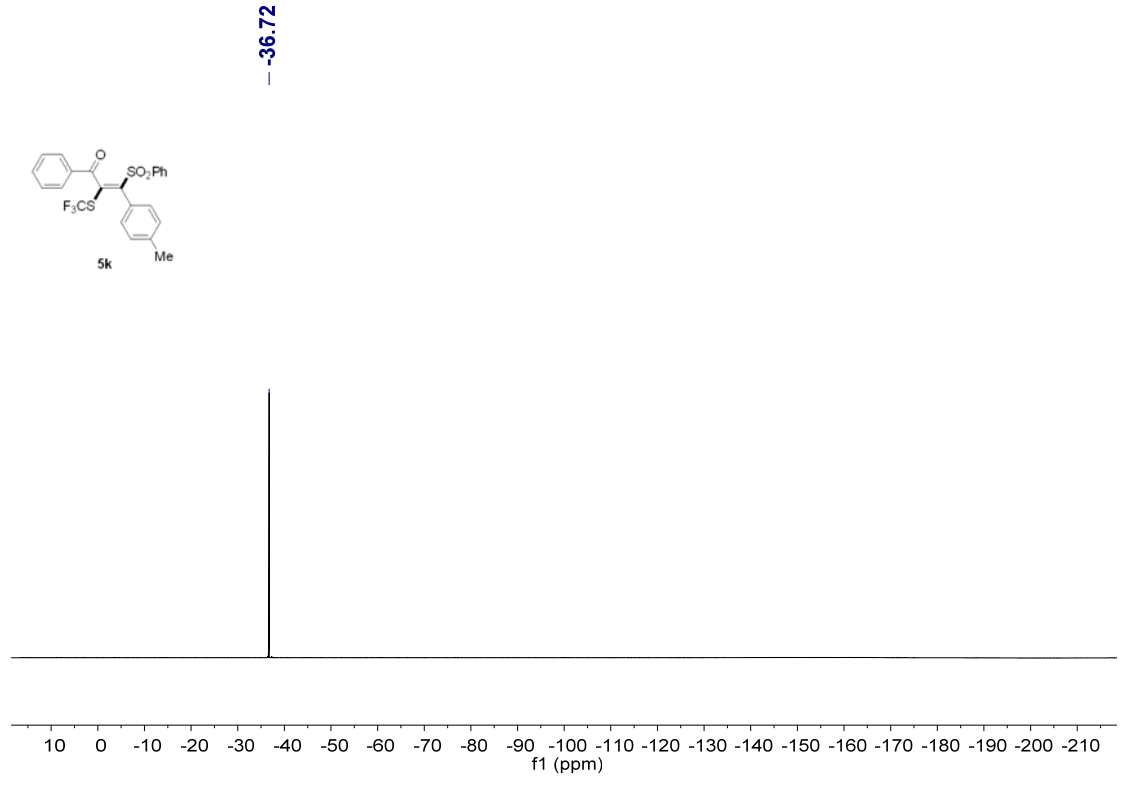

5l

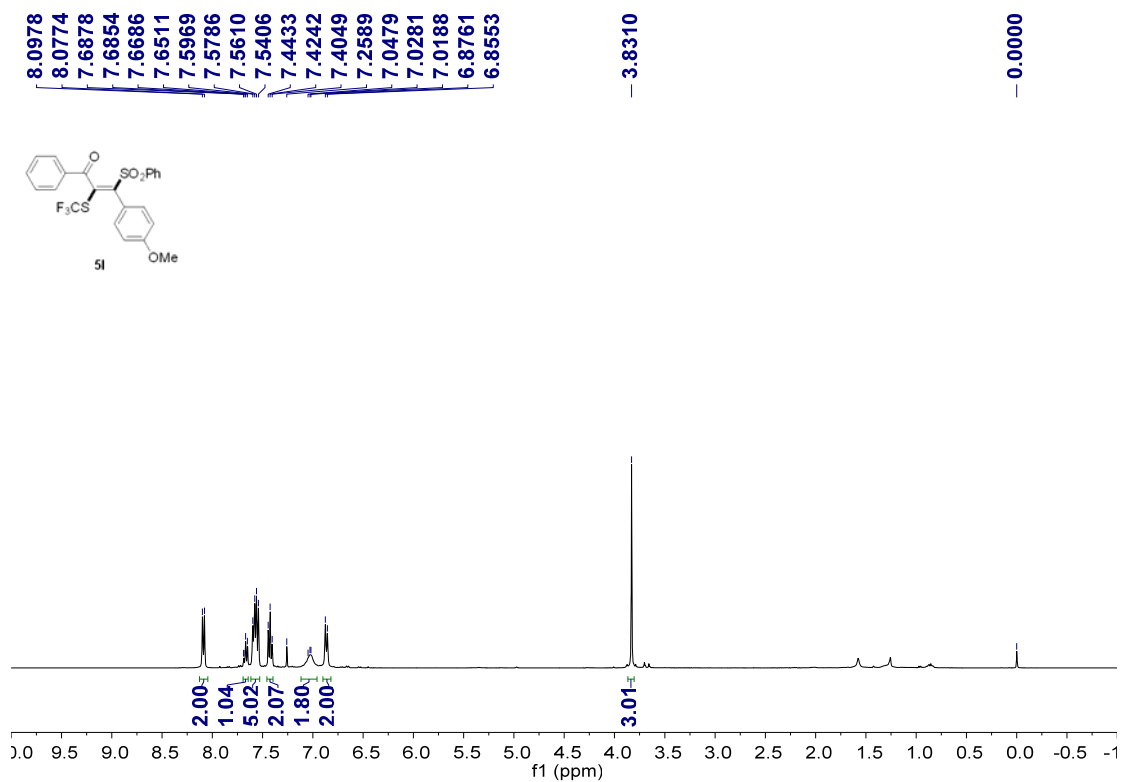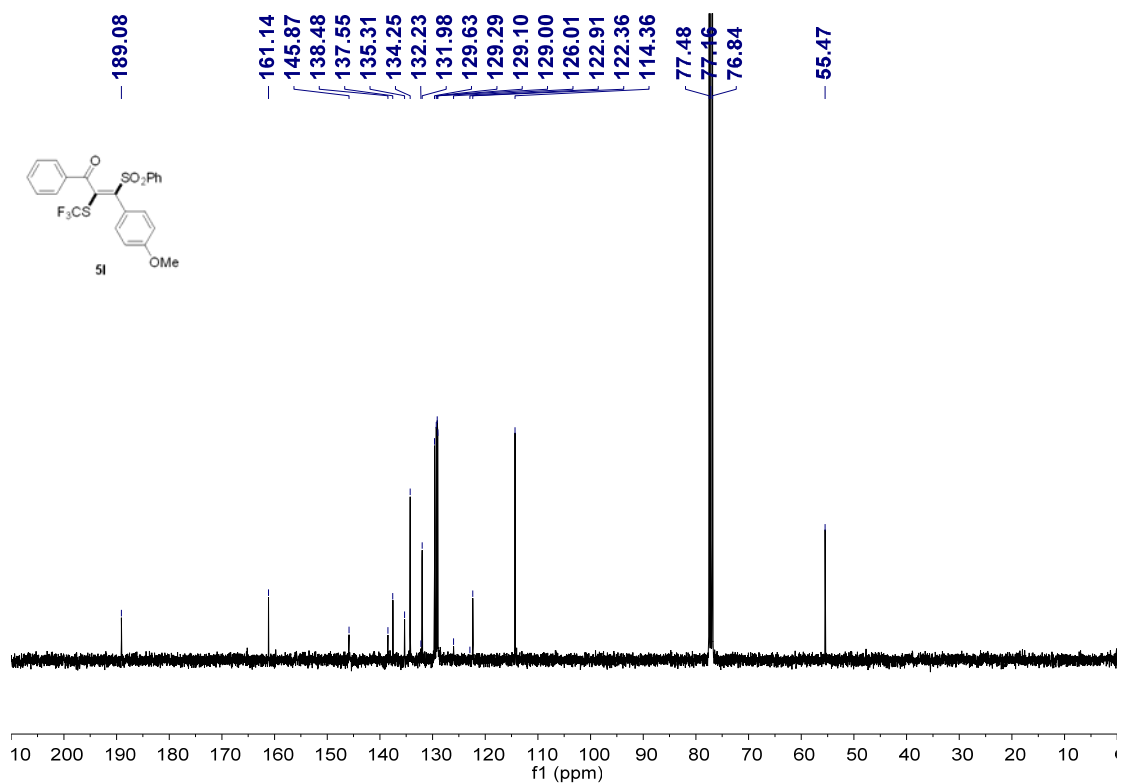

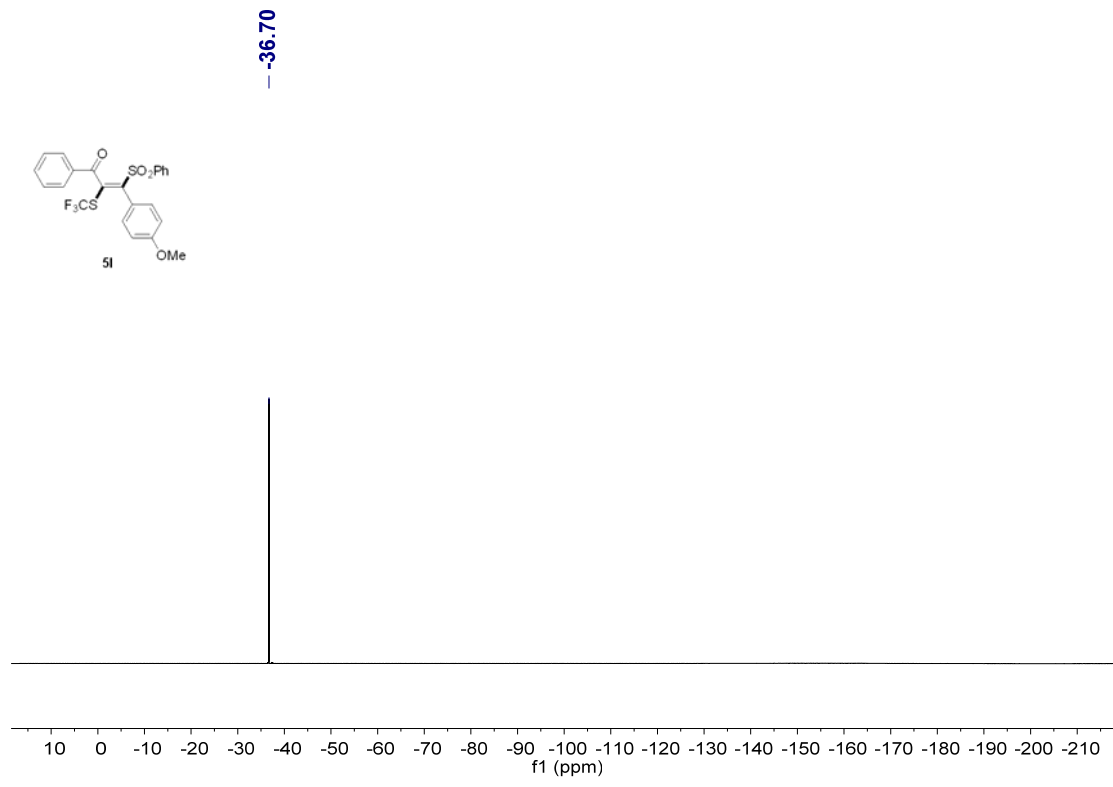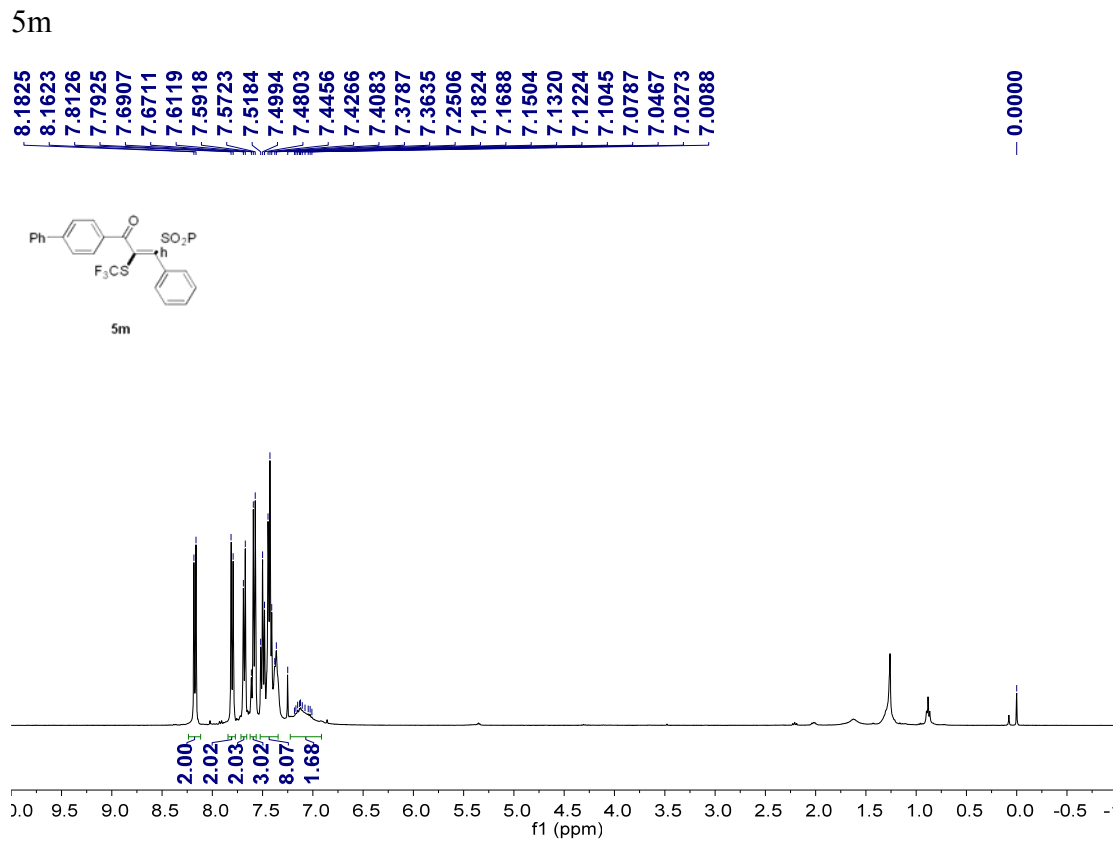

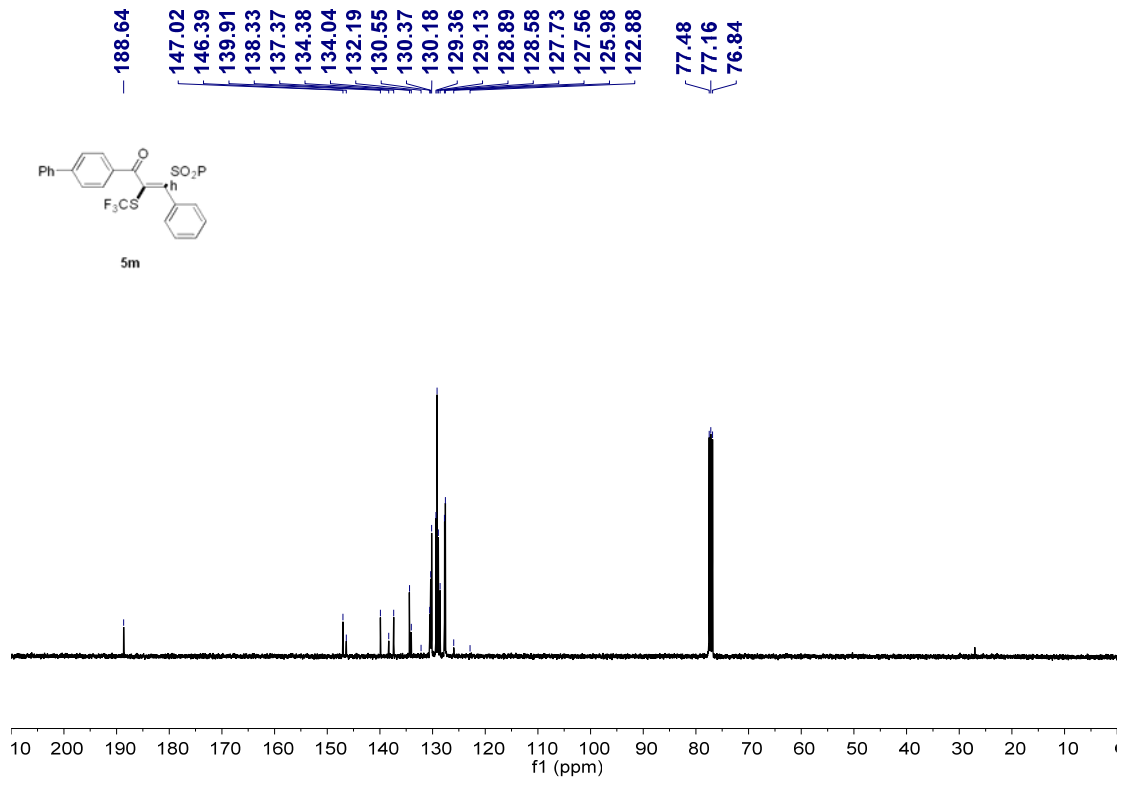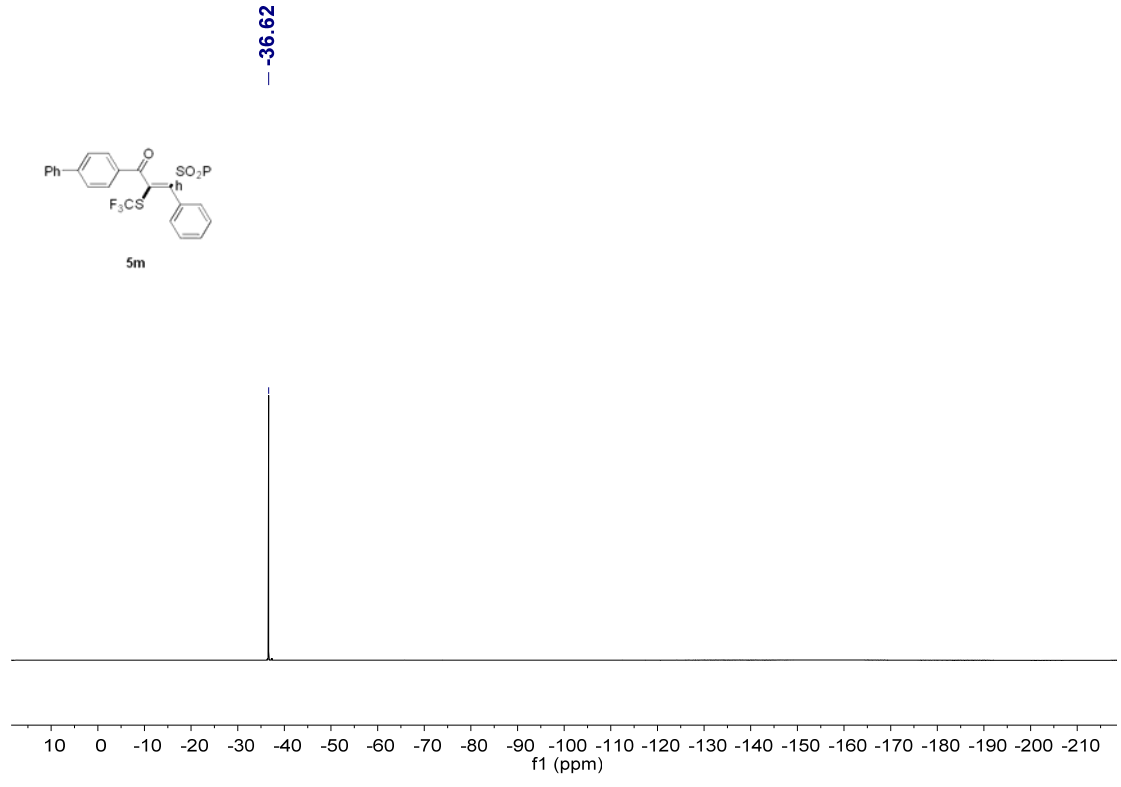

5n

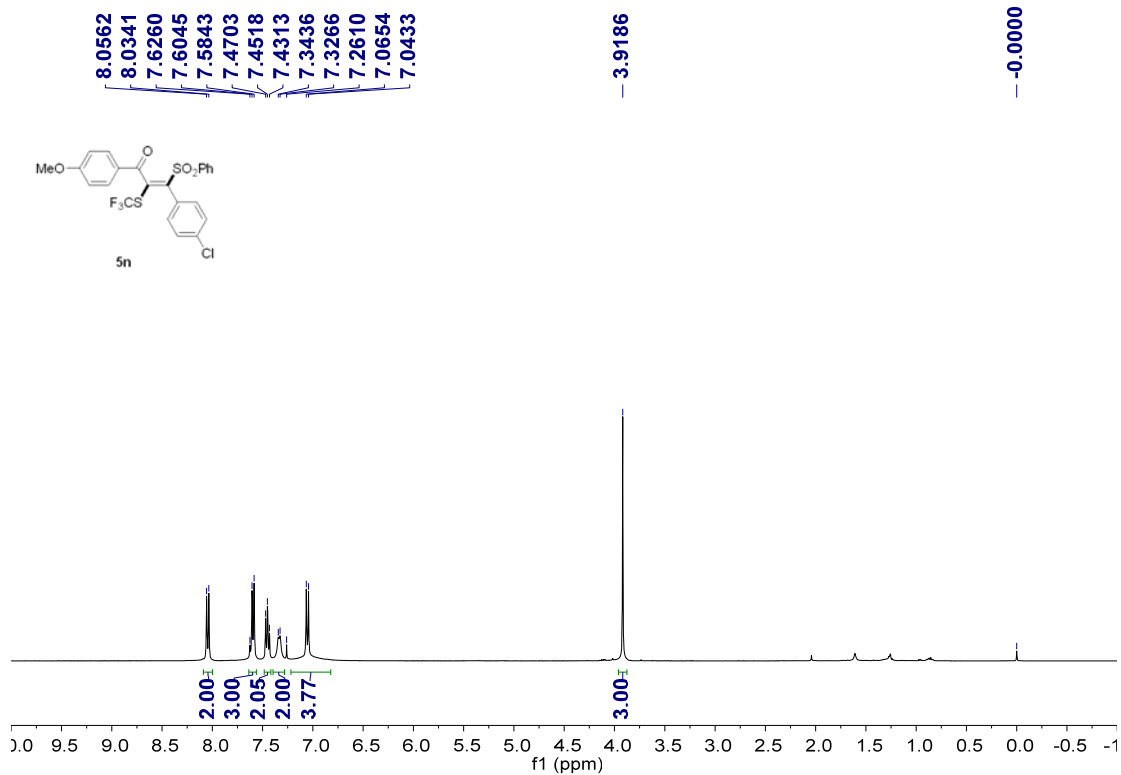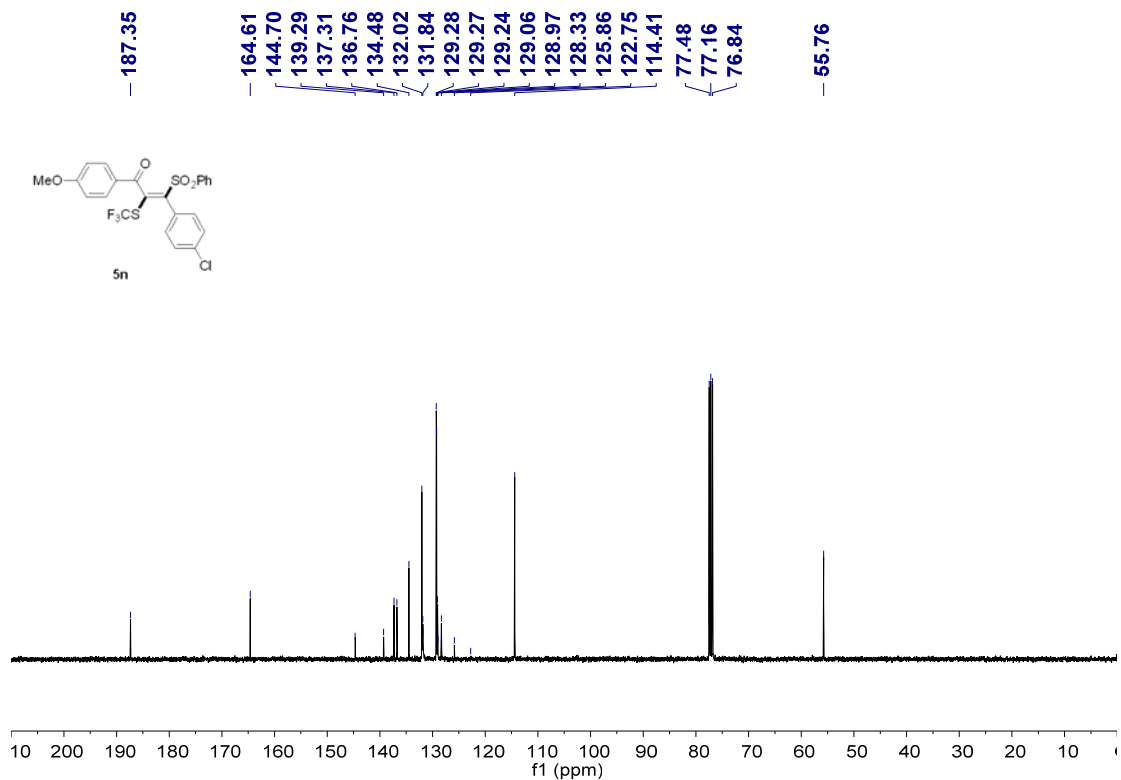

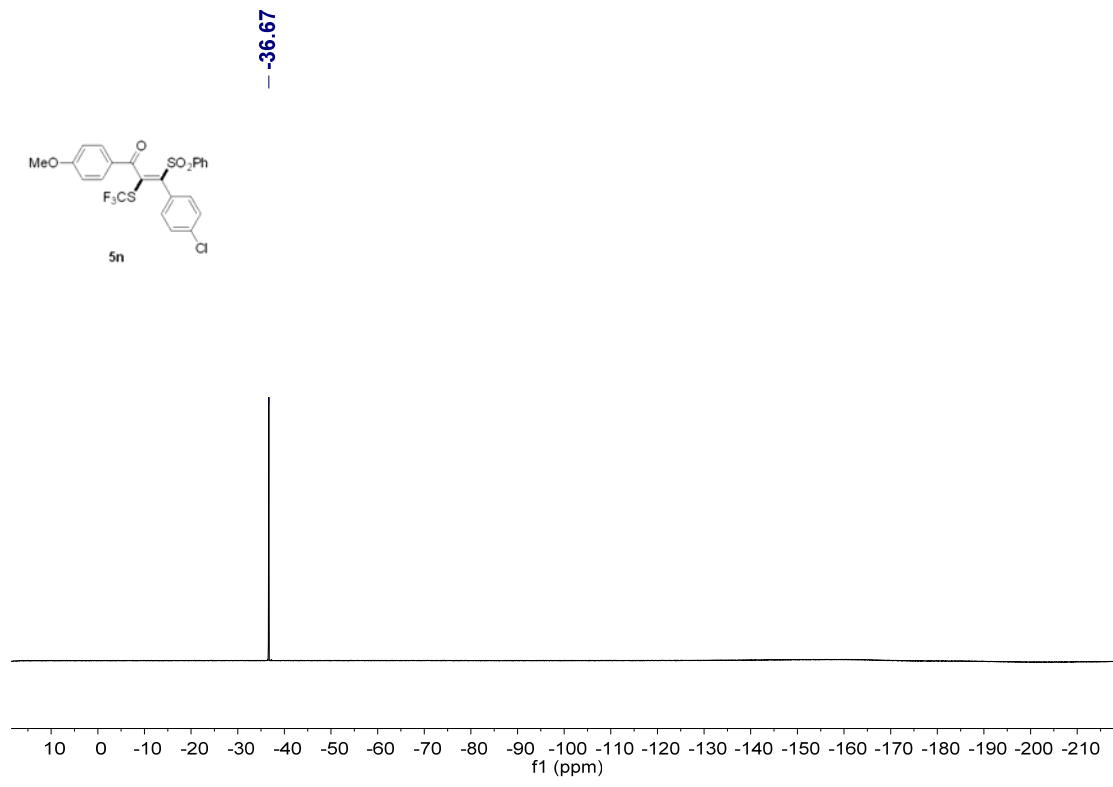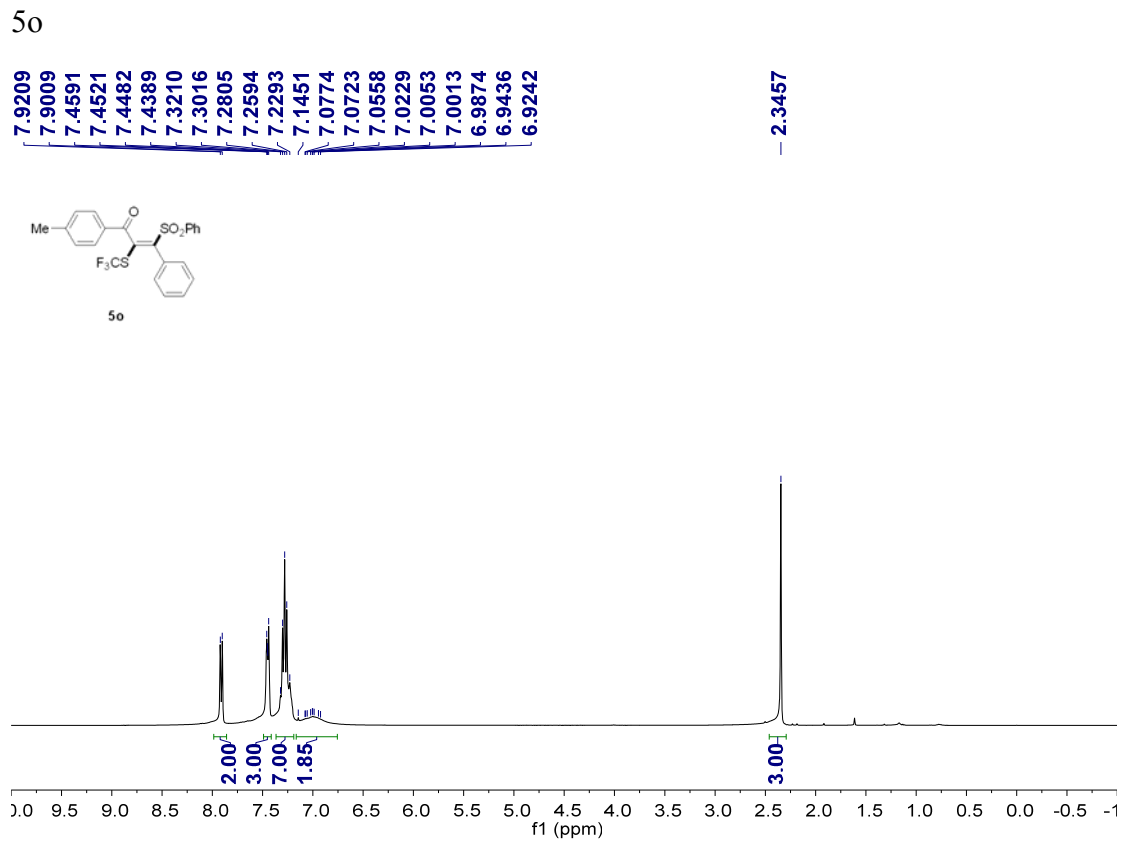



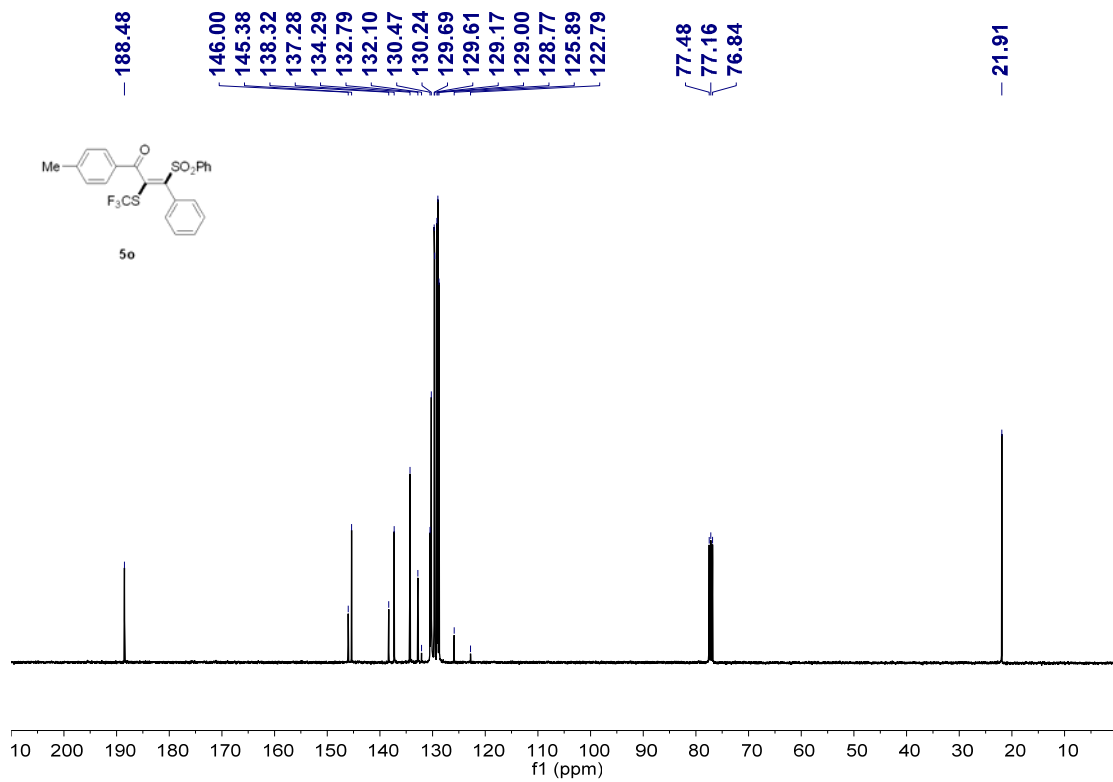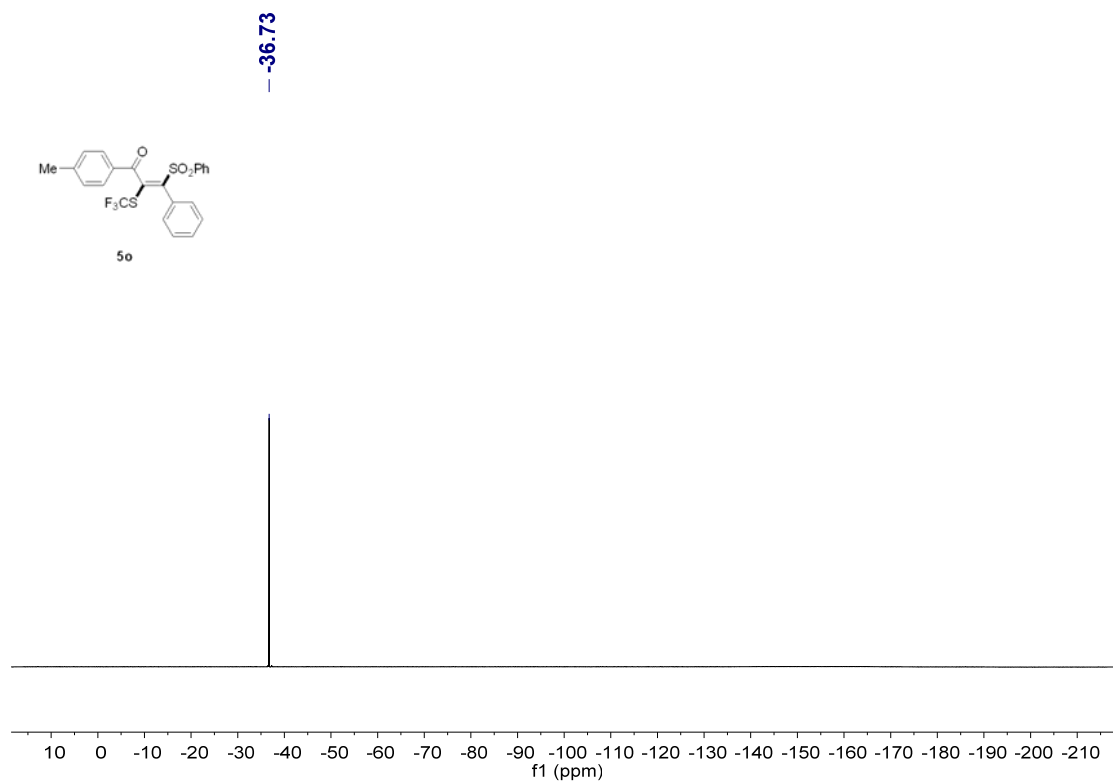

5p

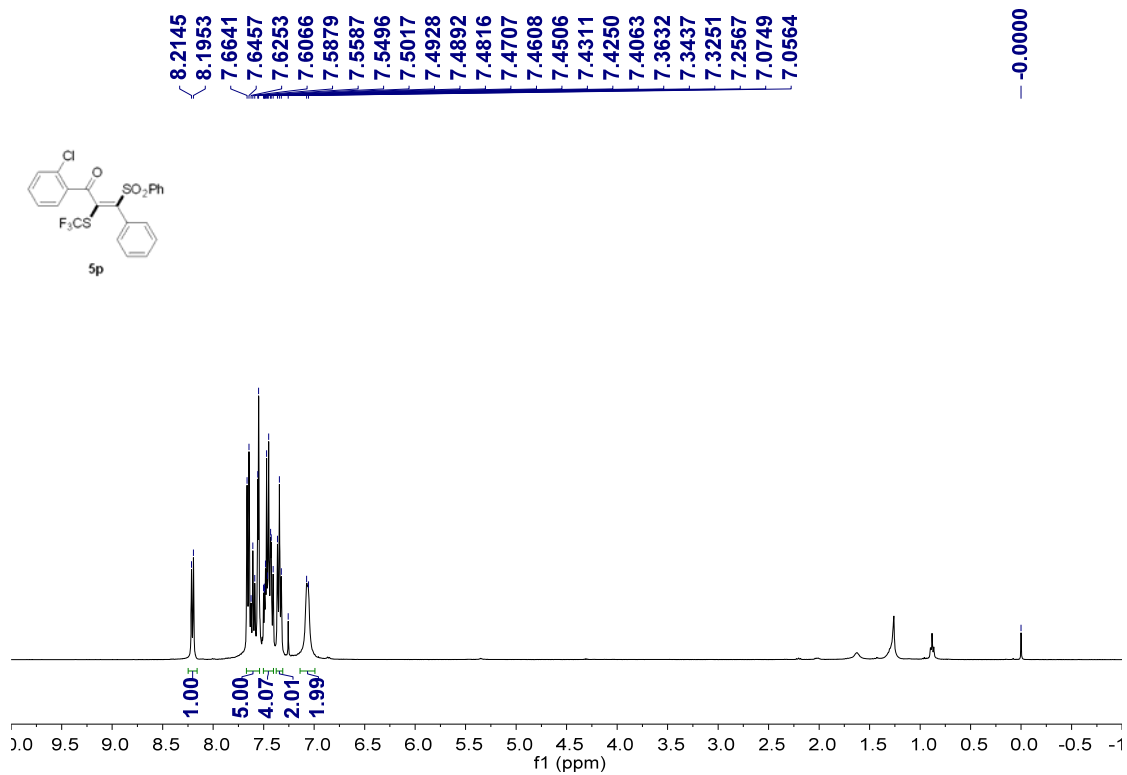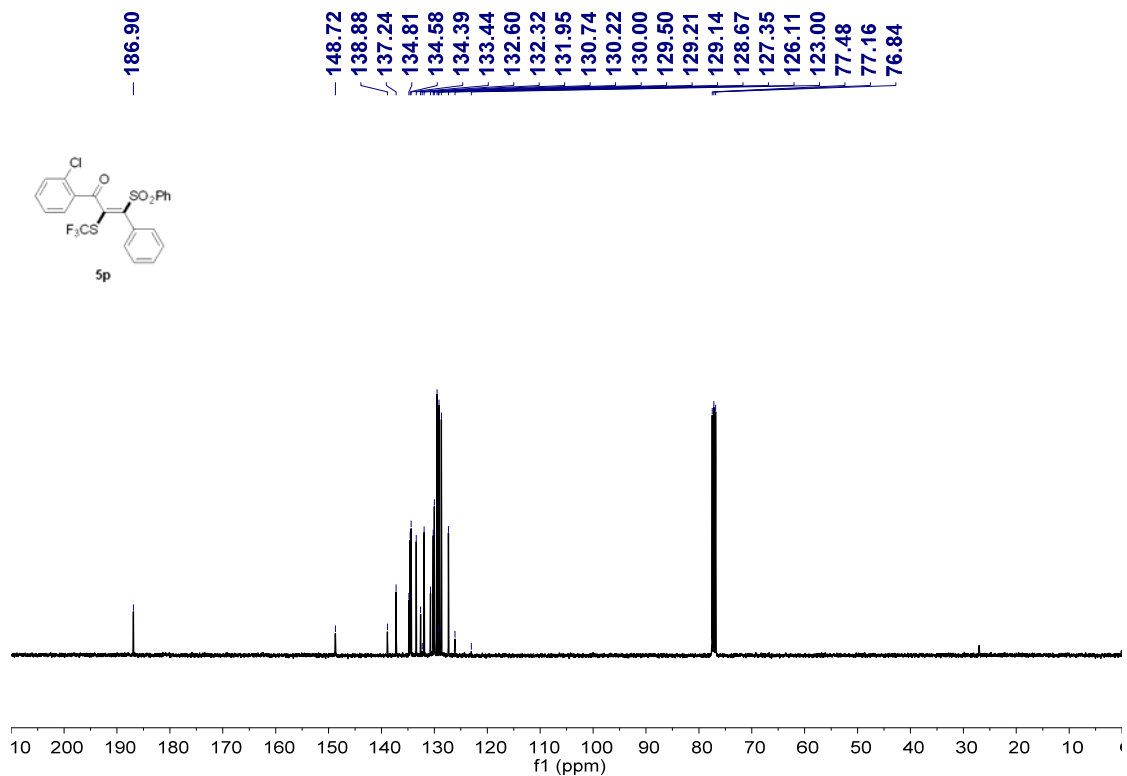

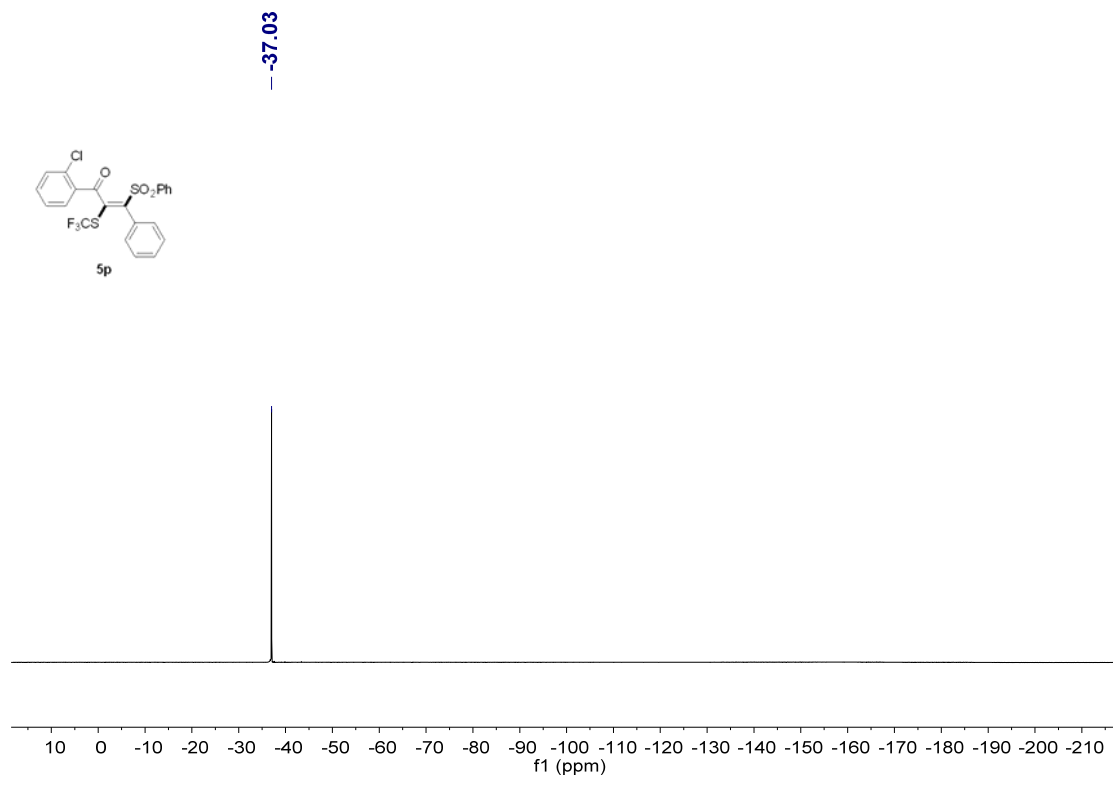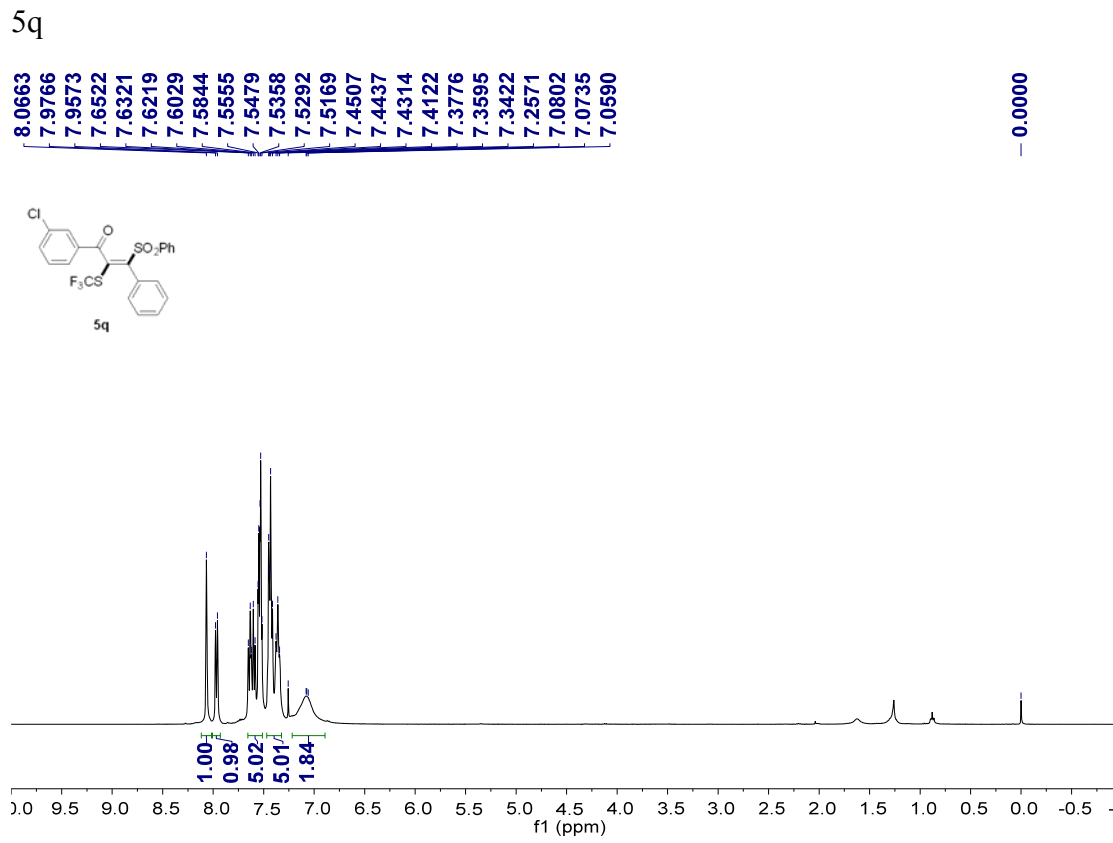

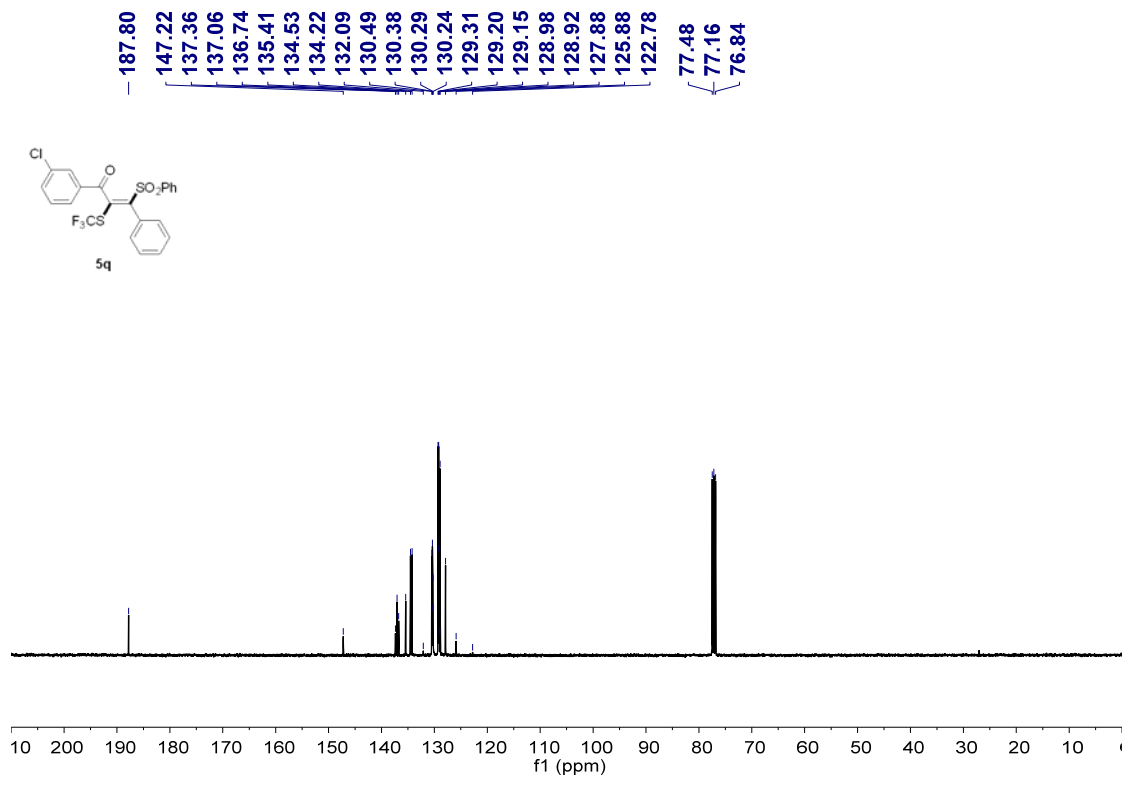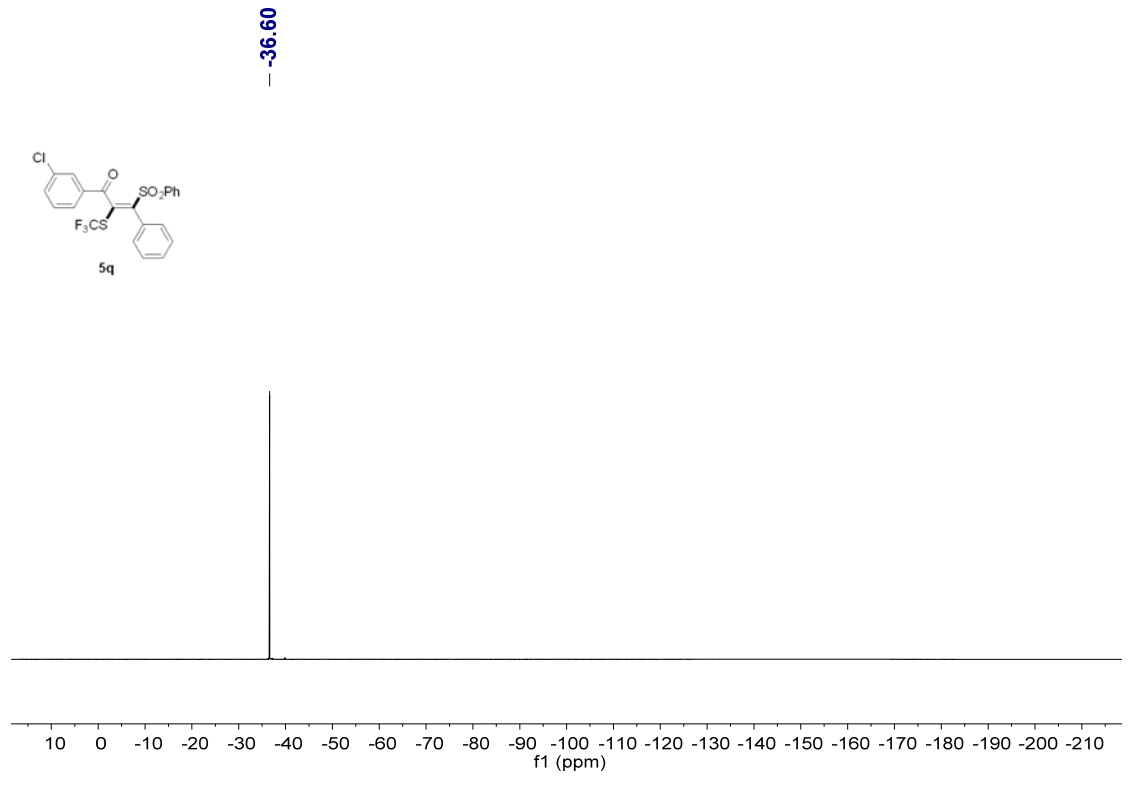

5r

7.8875  
7.8682  
7.8043  
7.7819  
7.6194  
7.6012  
7.5818  
7.5598  
7.5390  
7.4499  
7.4435  
7.4311  
7.4120  
7.3982  
7.3920  
7.3774  
7.3719  
7.3576  
7.2571  
7.1941  
7.1436  
7.1072  
7.0725  
7.0515  
7.0338

-0.0000

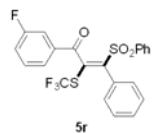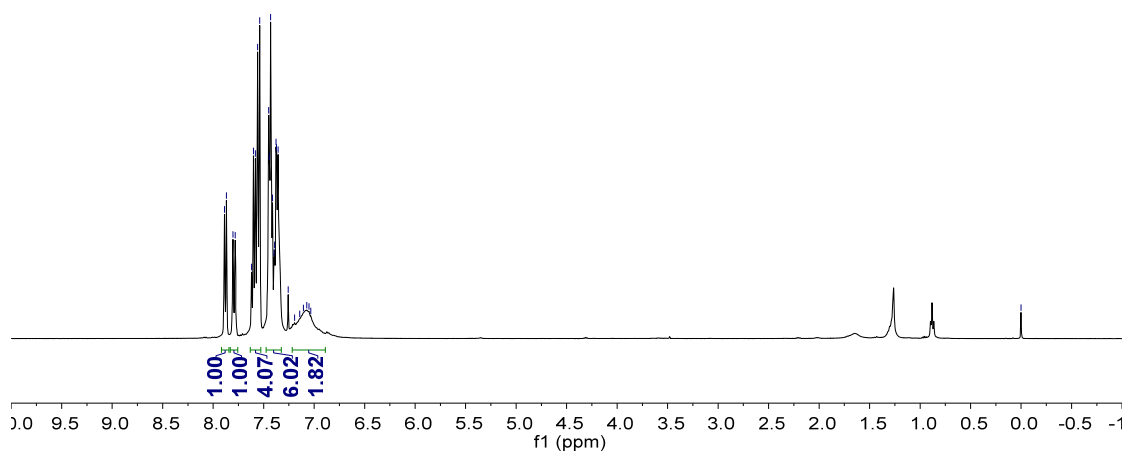

187.85  
164.28  
161.81  
147.09  
137.51  
137.31  
137.25  
137.11  
134.52  
132.10  
130.80  
130.73  
130.48  
130.27  
129.32  
129.19  
129.00  
128.92  
125.89  
125.57  
125.54  
122.79  
121.50  
121.29  
116.04  
115.82  
77.48  
77.16  
76.84

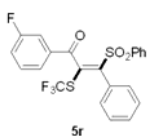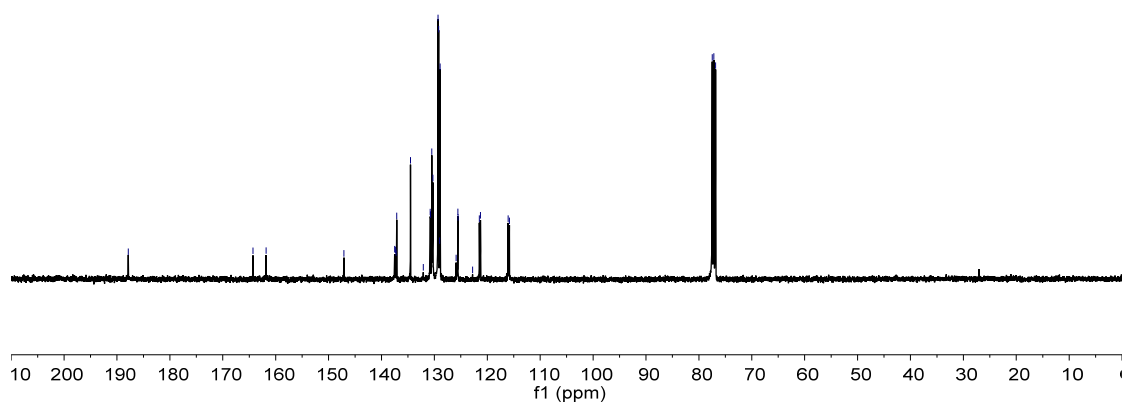

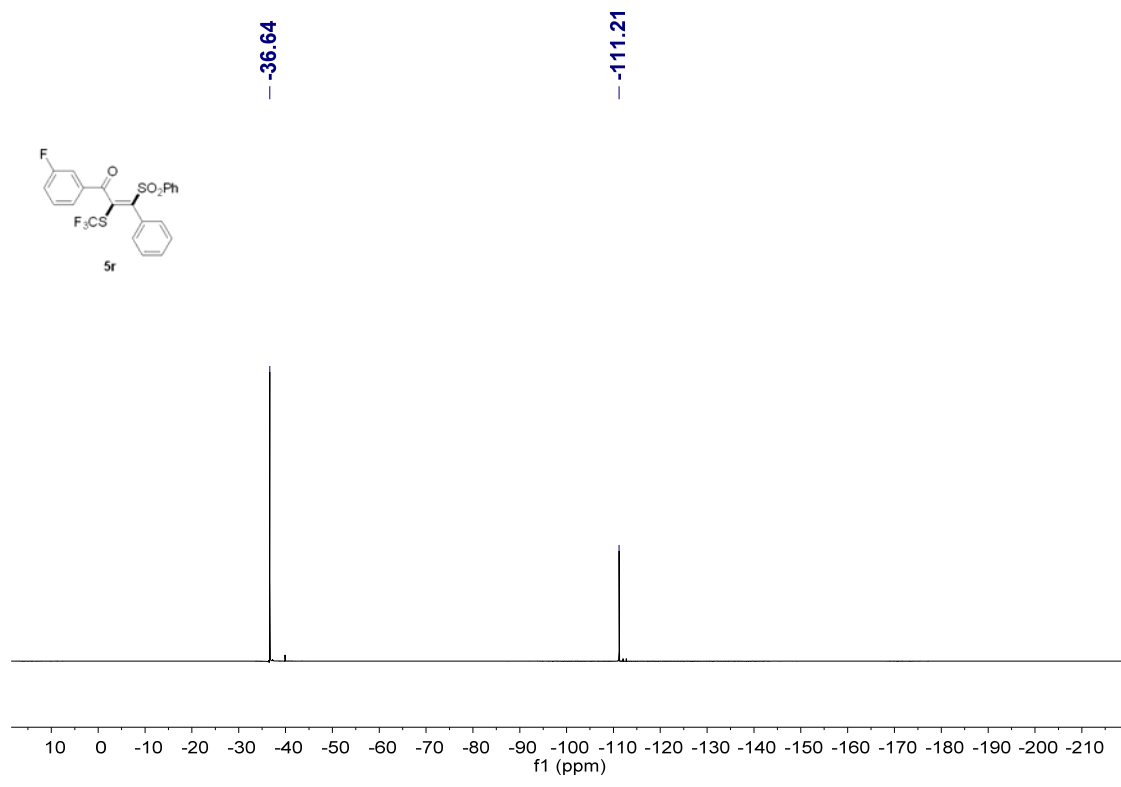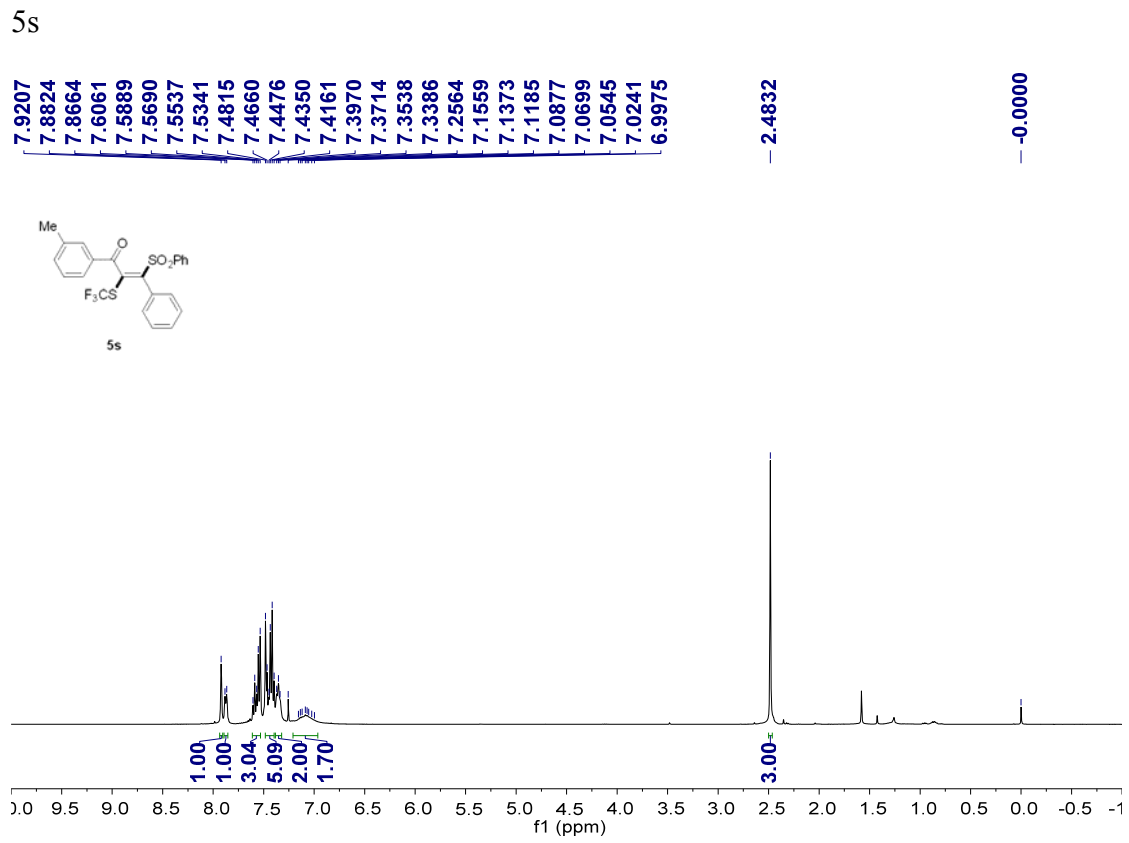

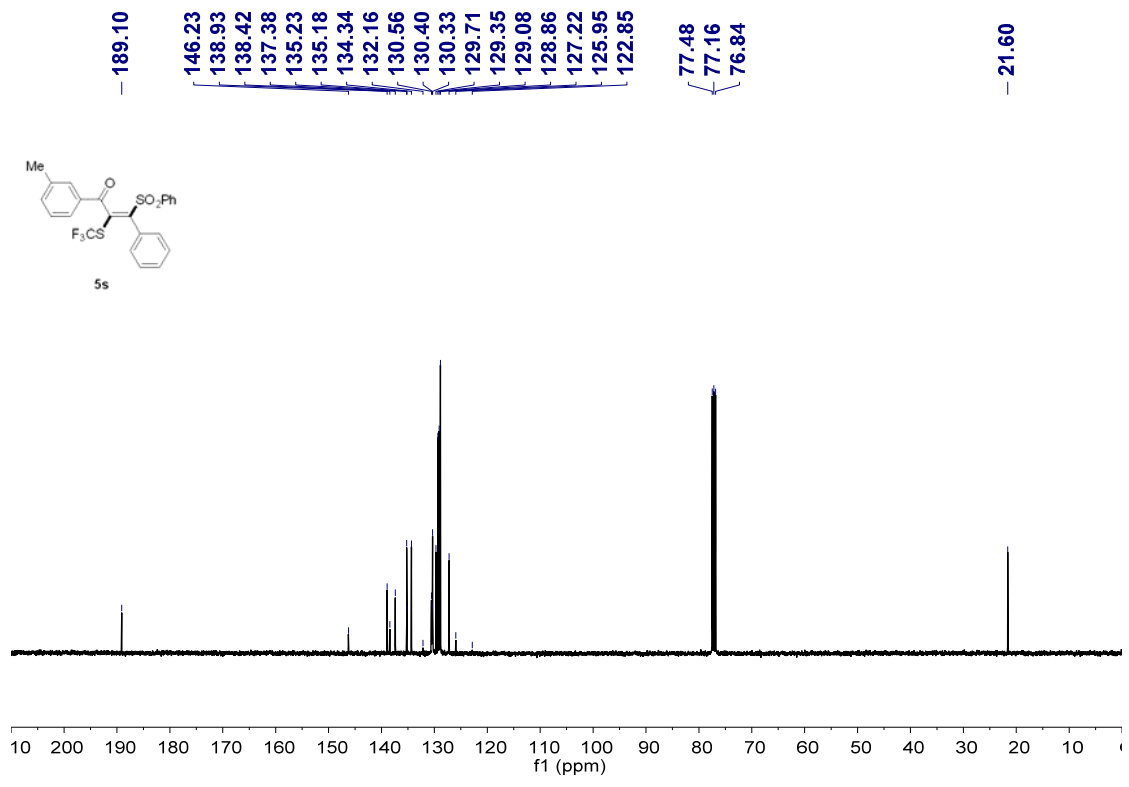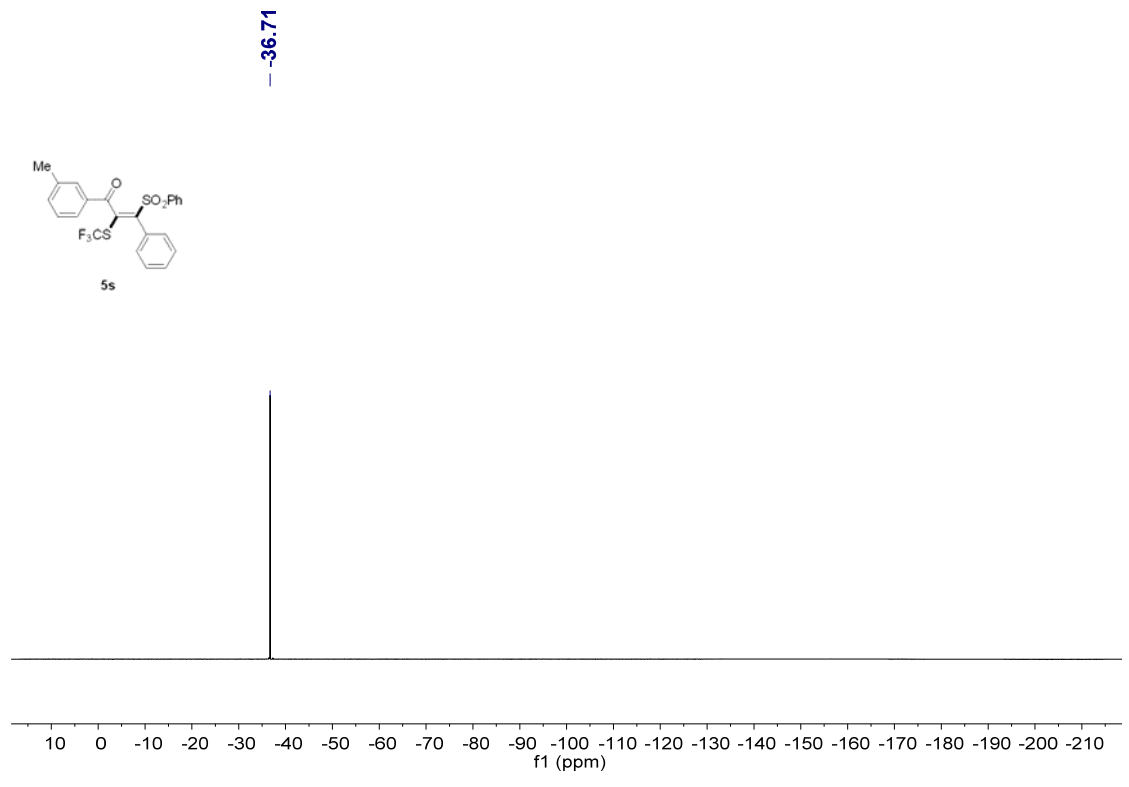

5t

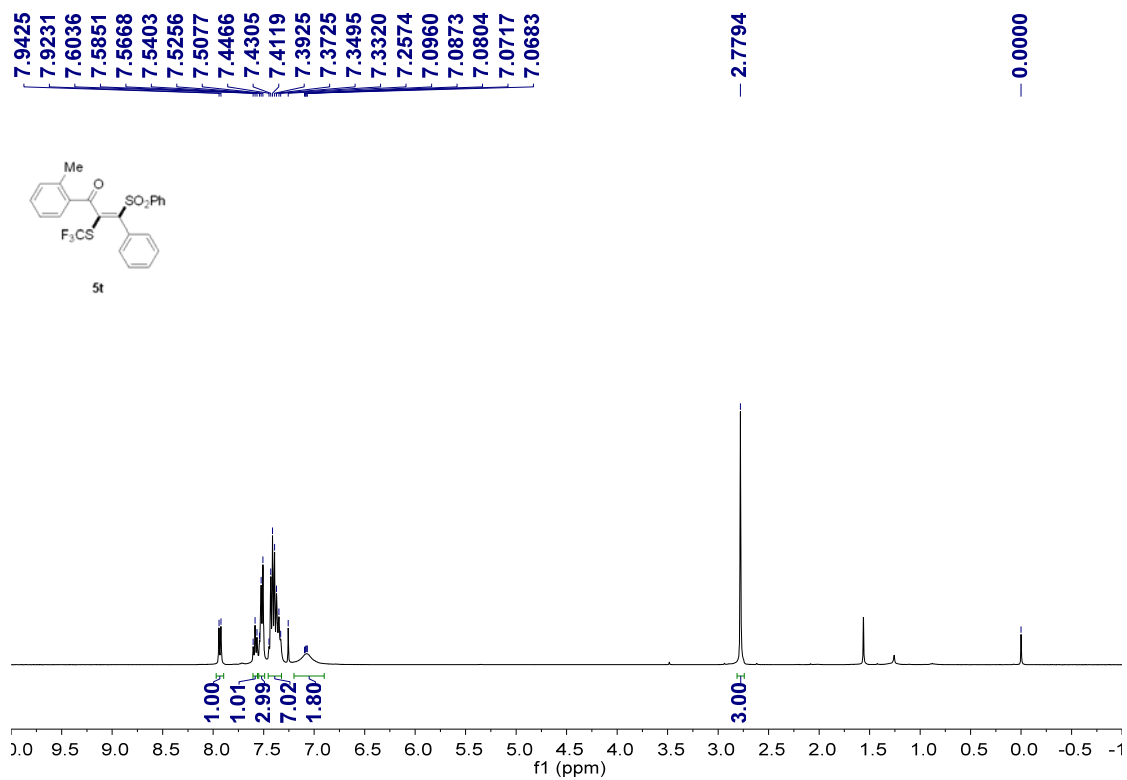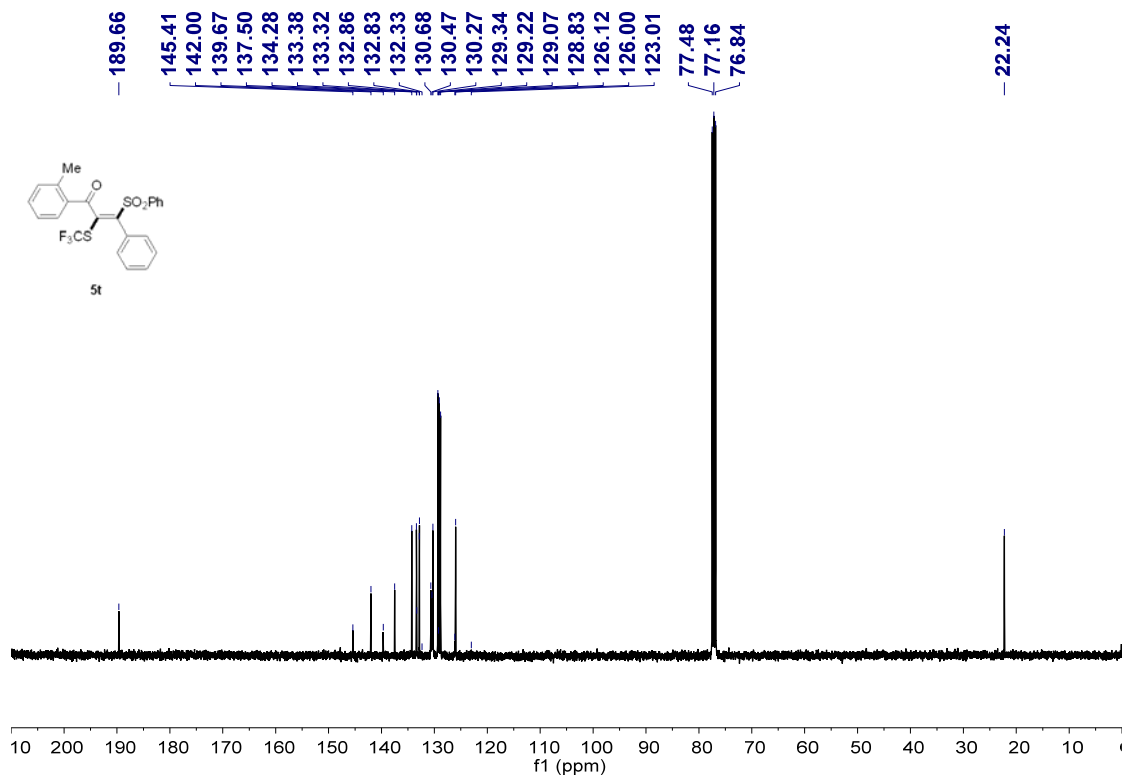



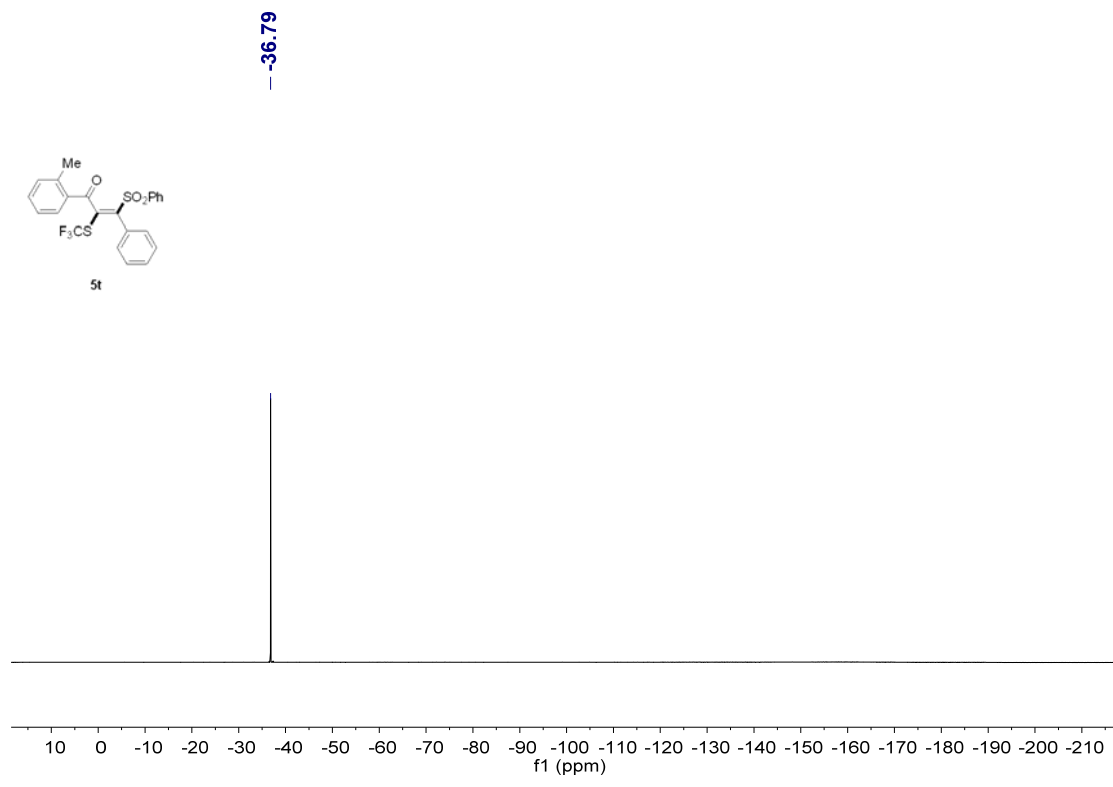

**5u**

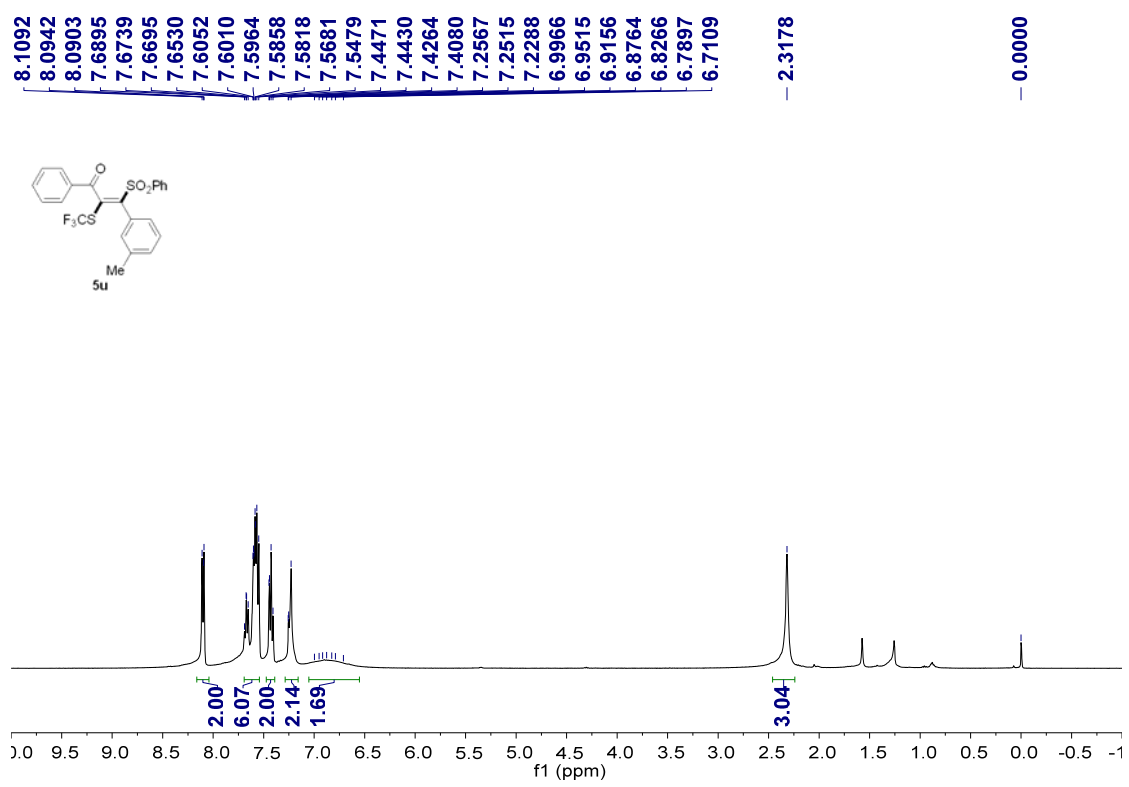

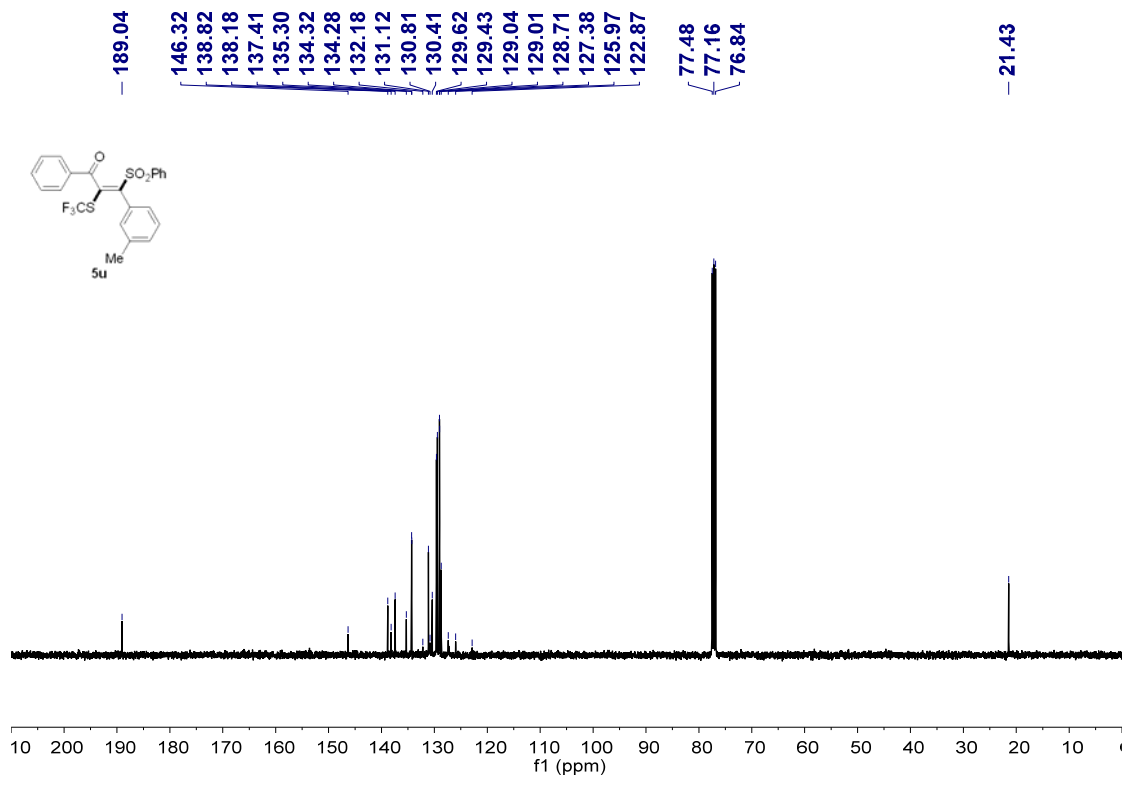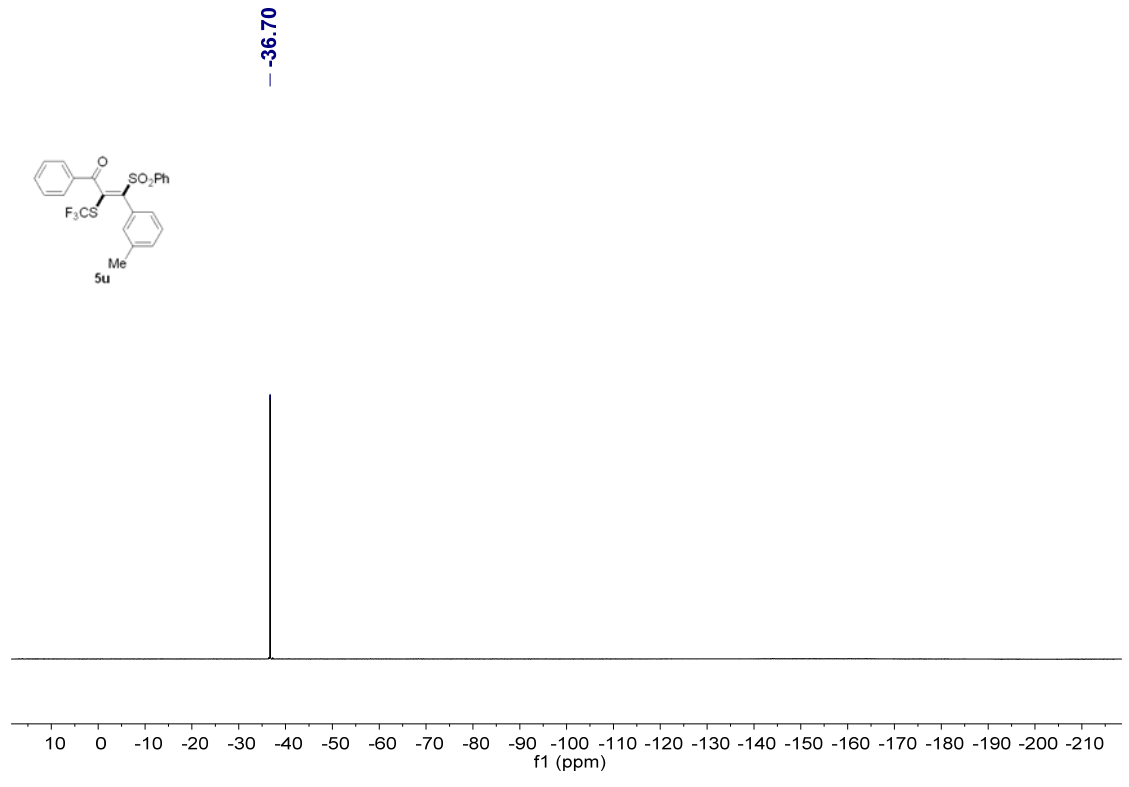

5v

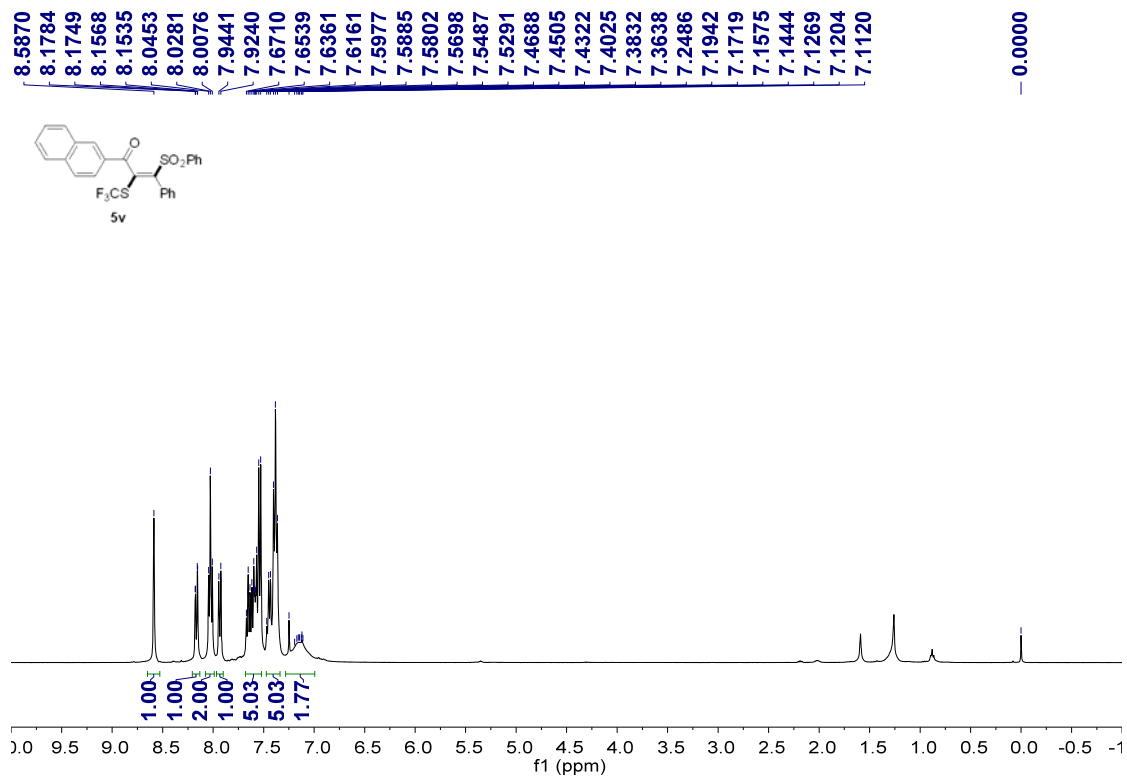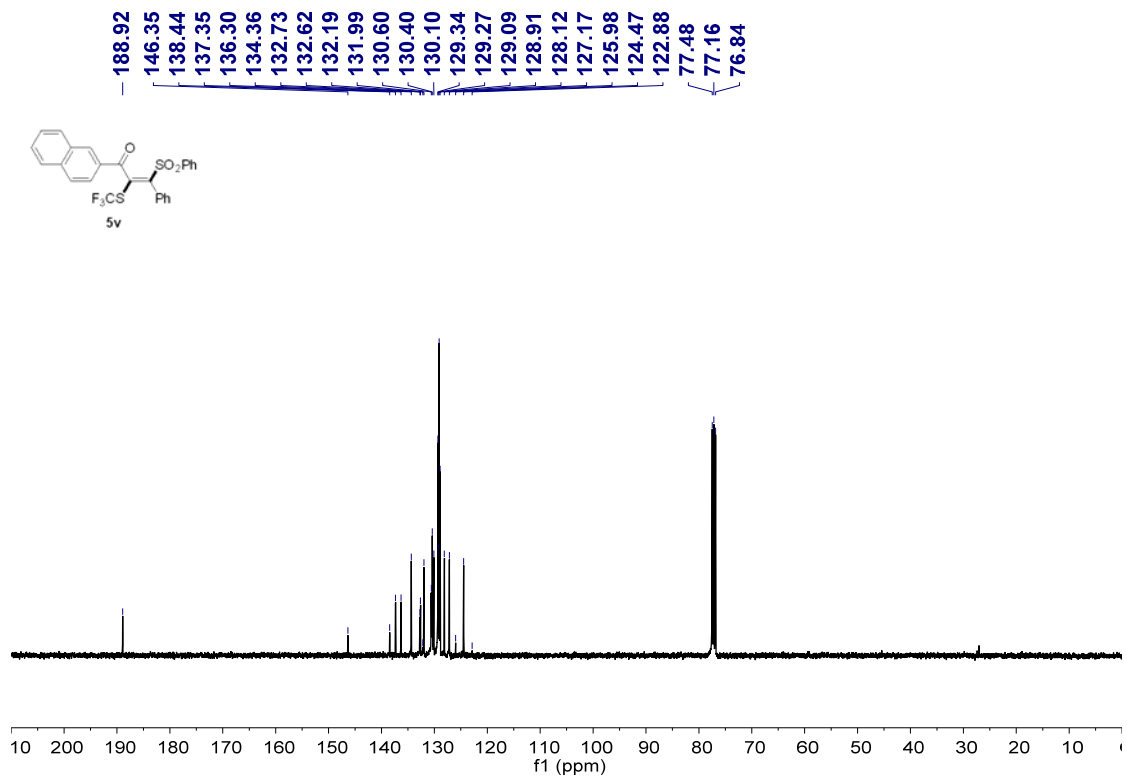

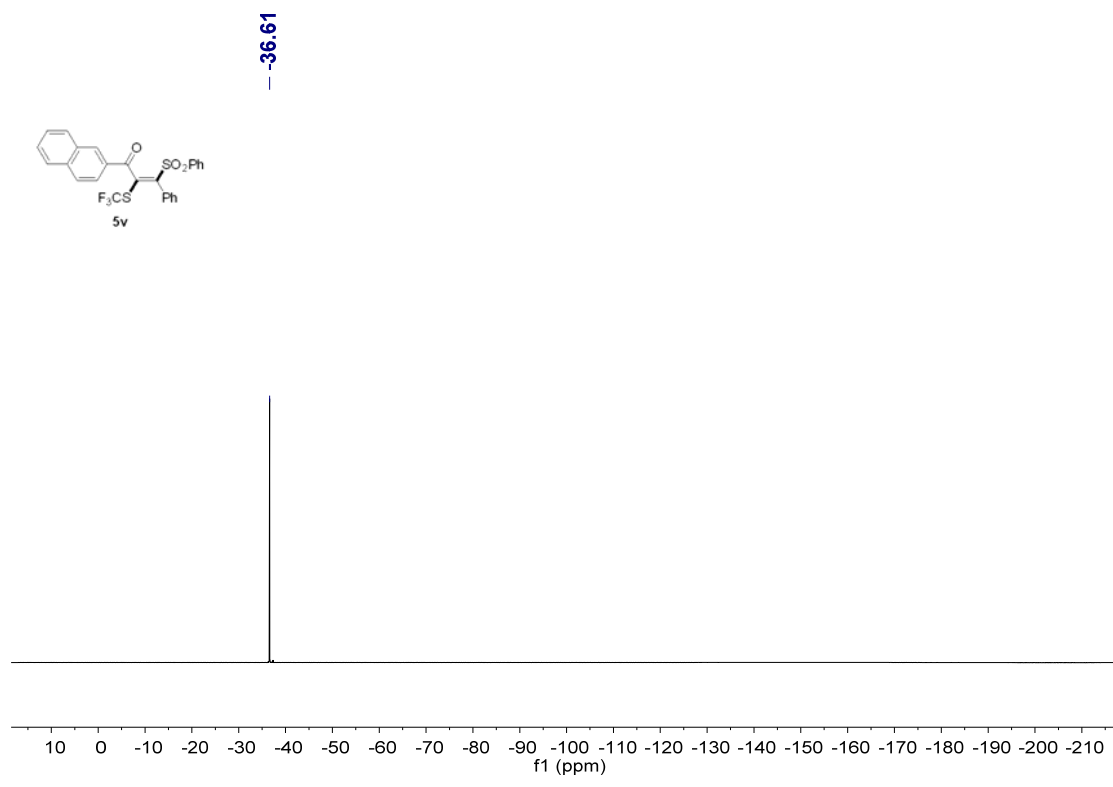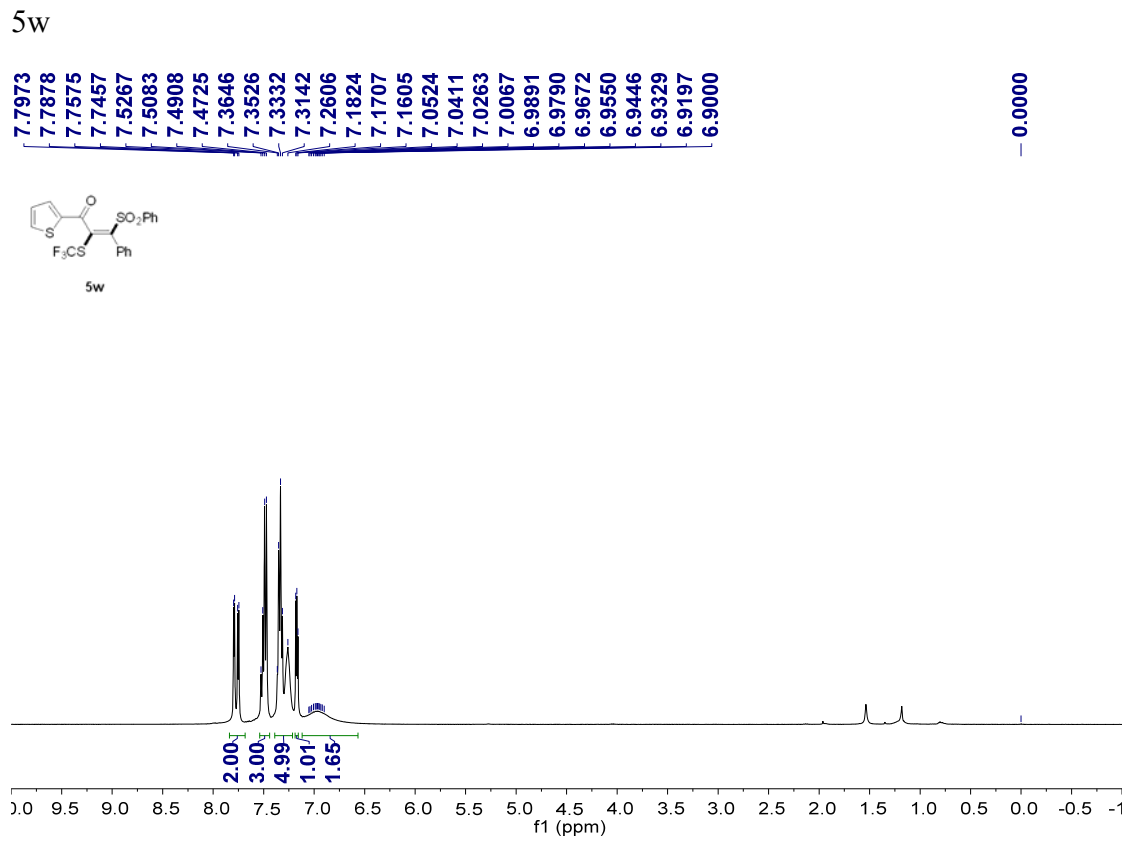

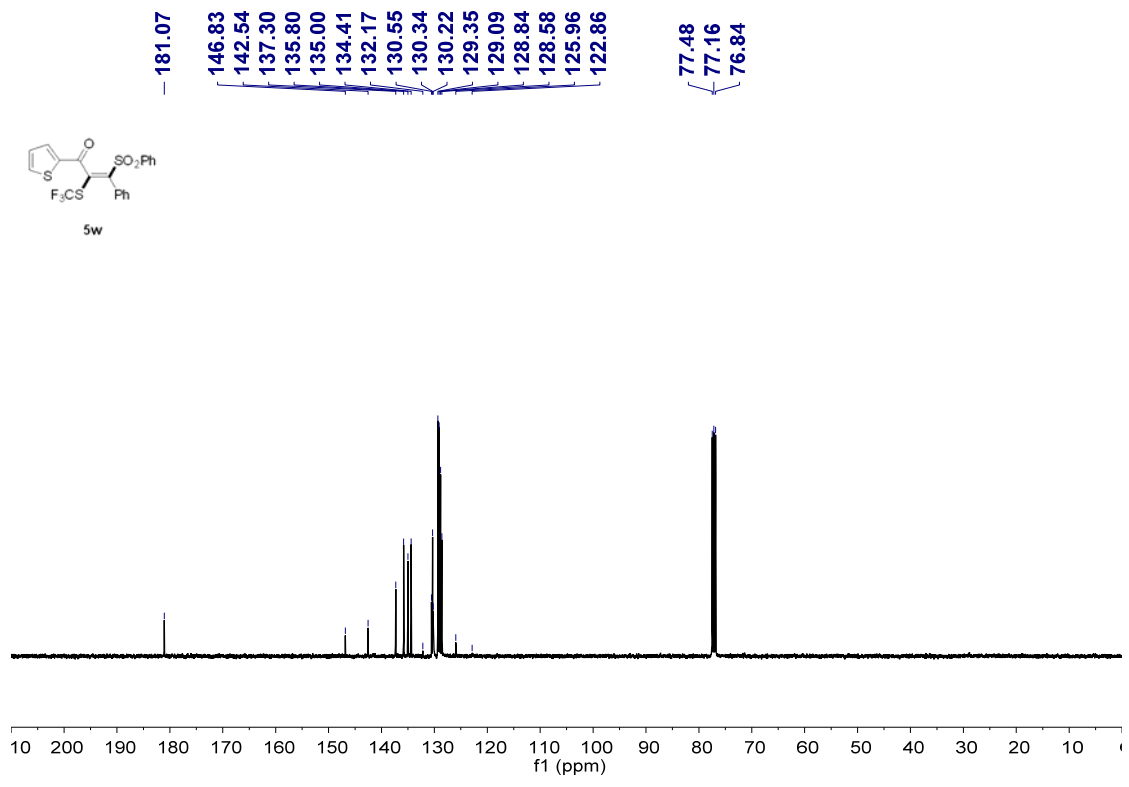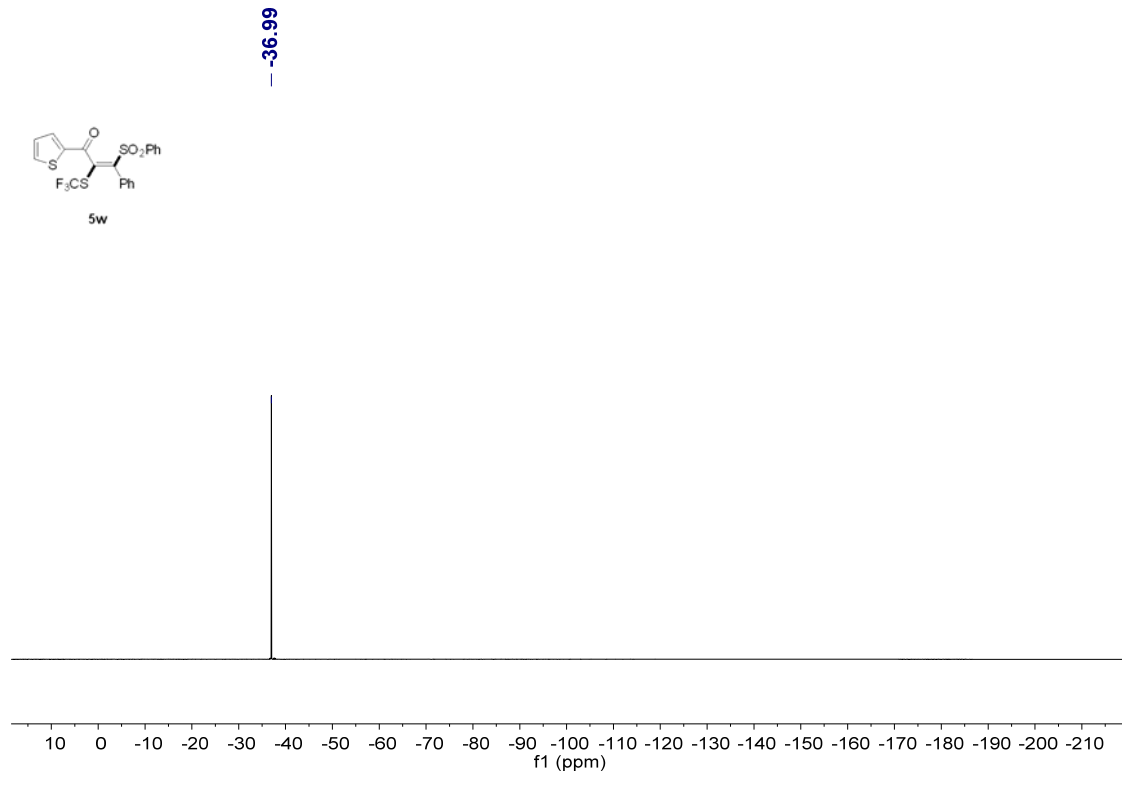

5x

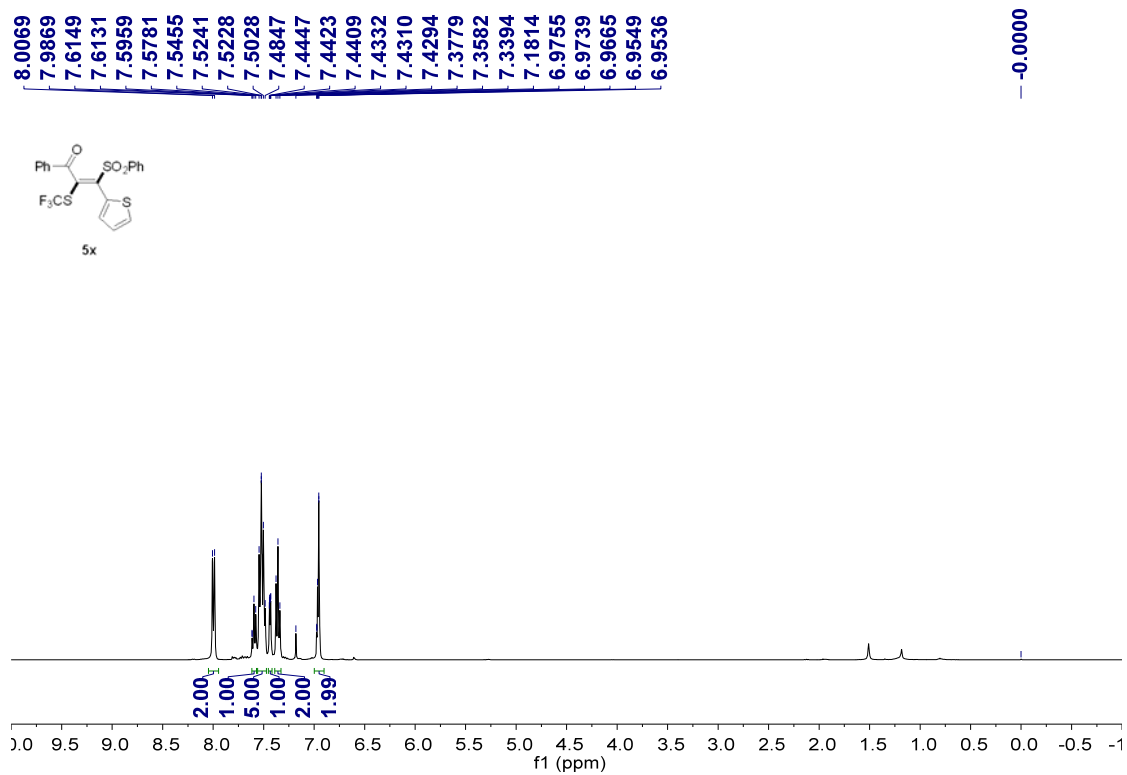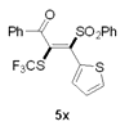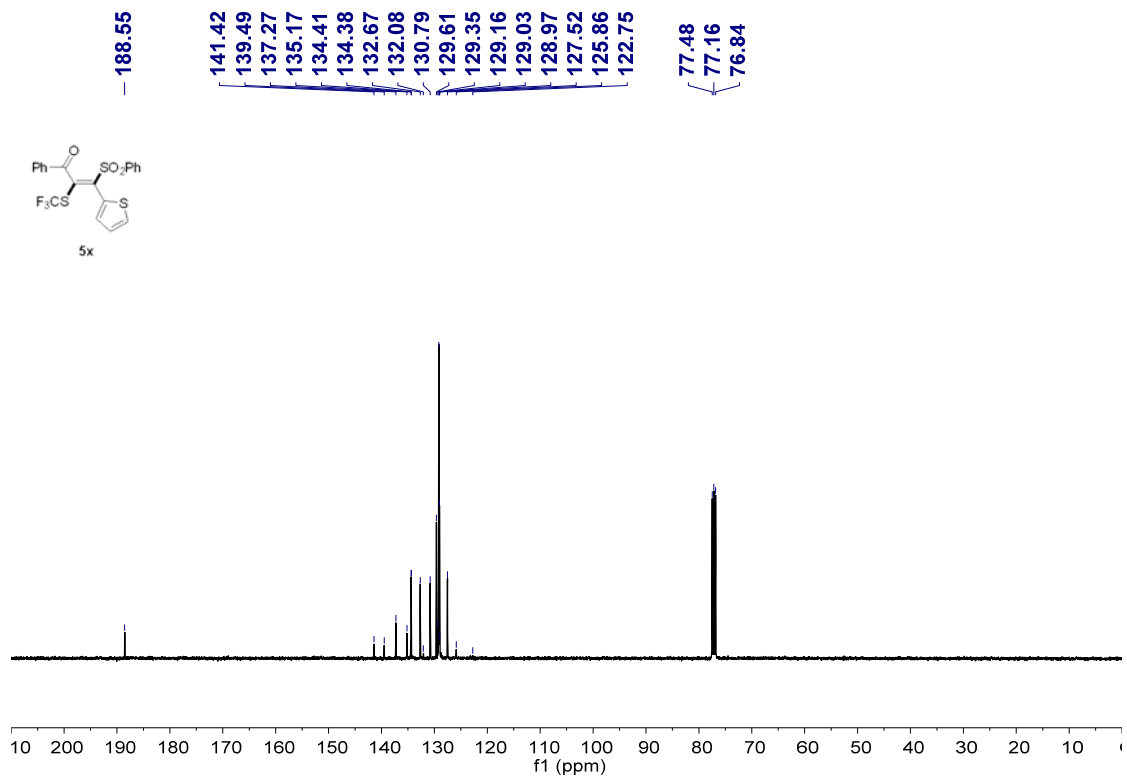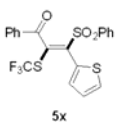

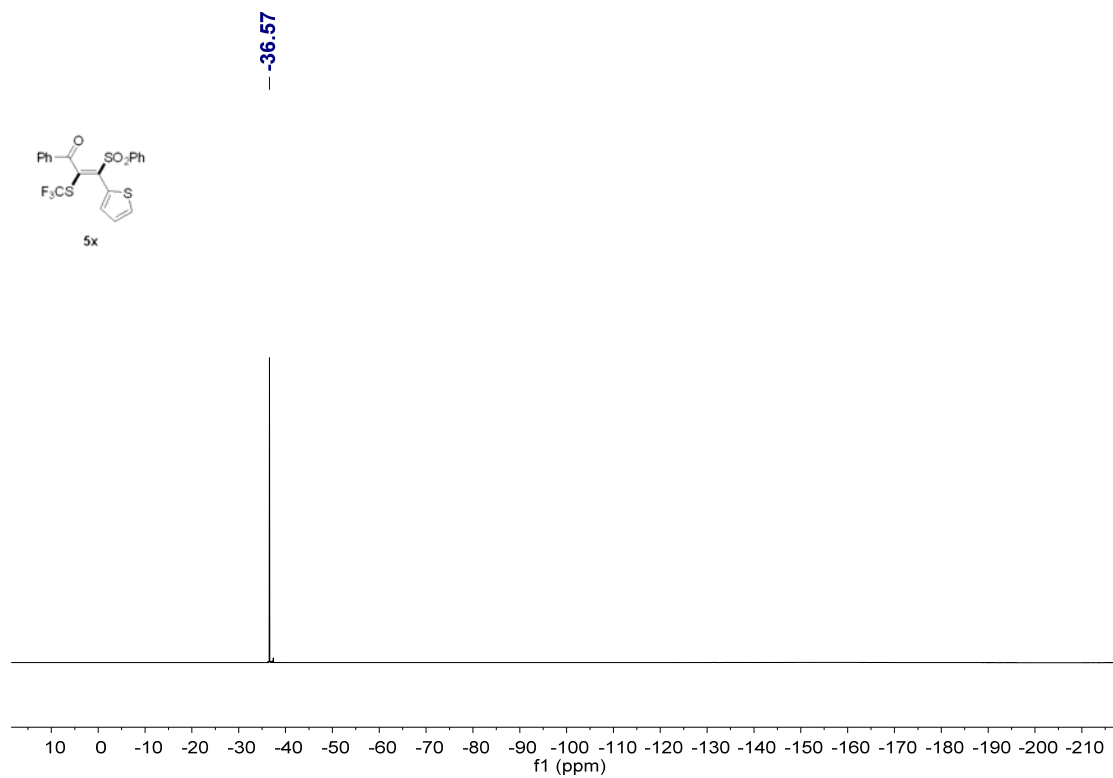

5y

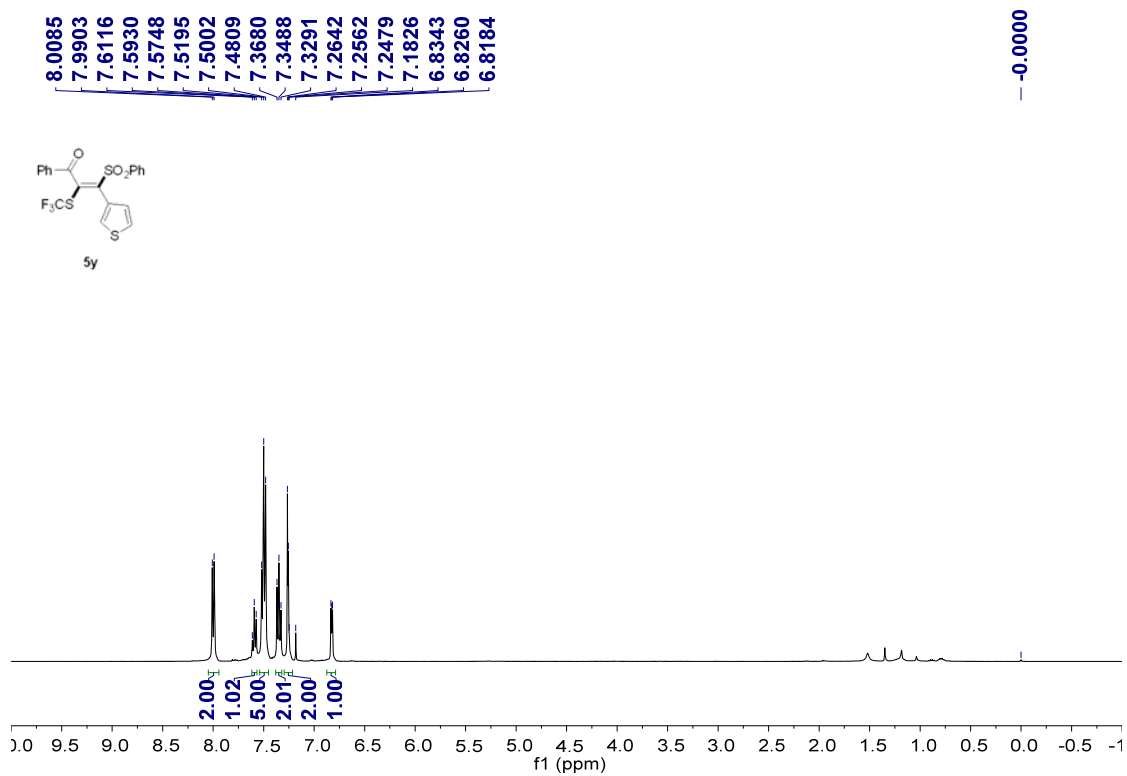

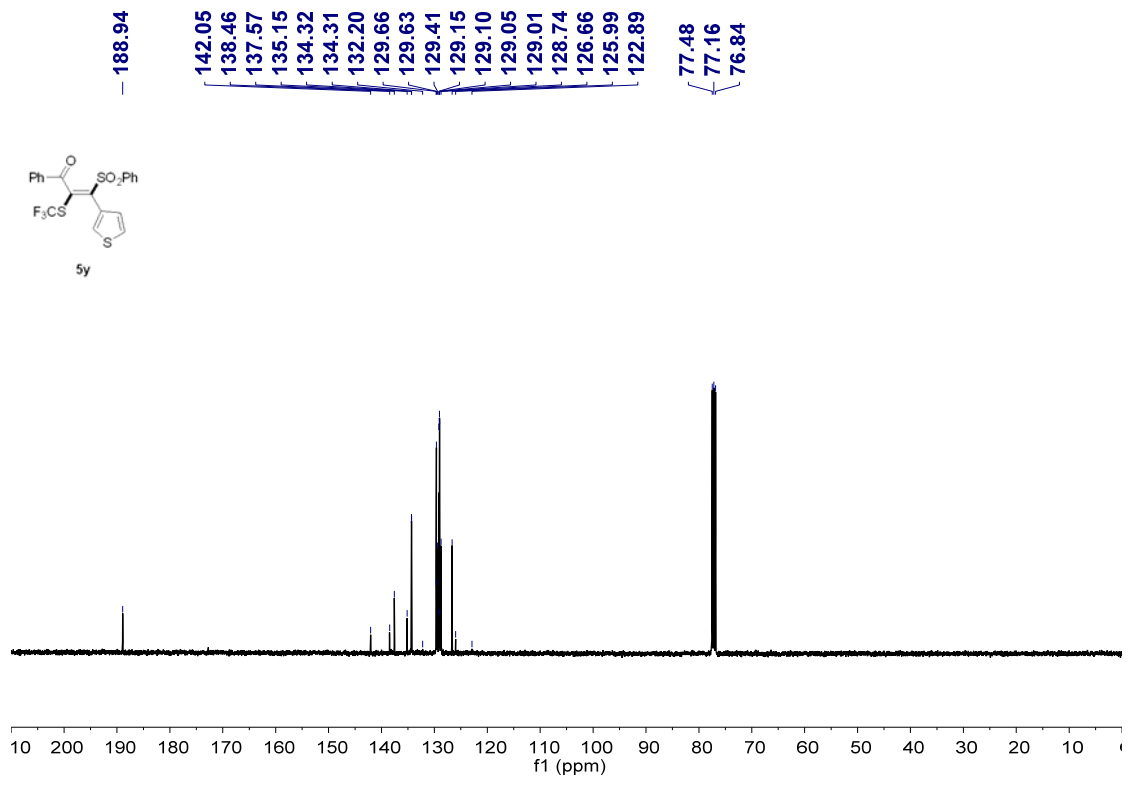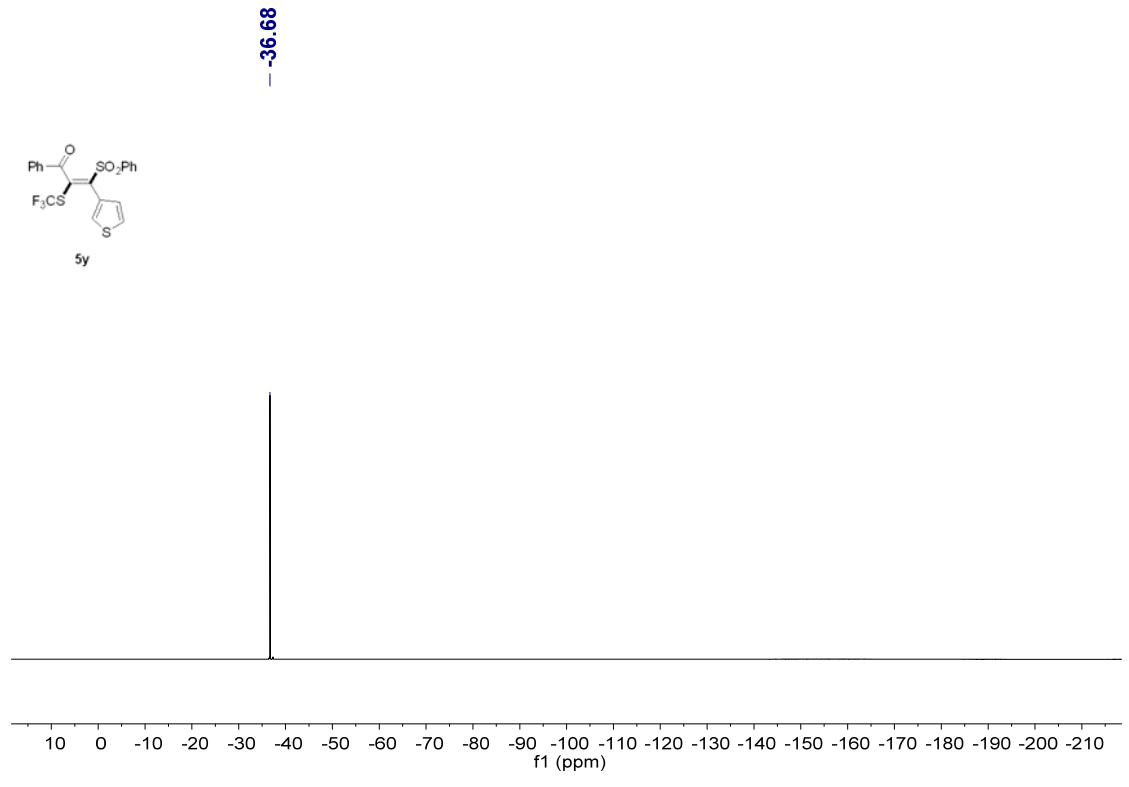



5z

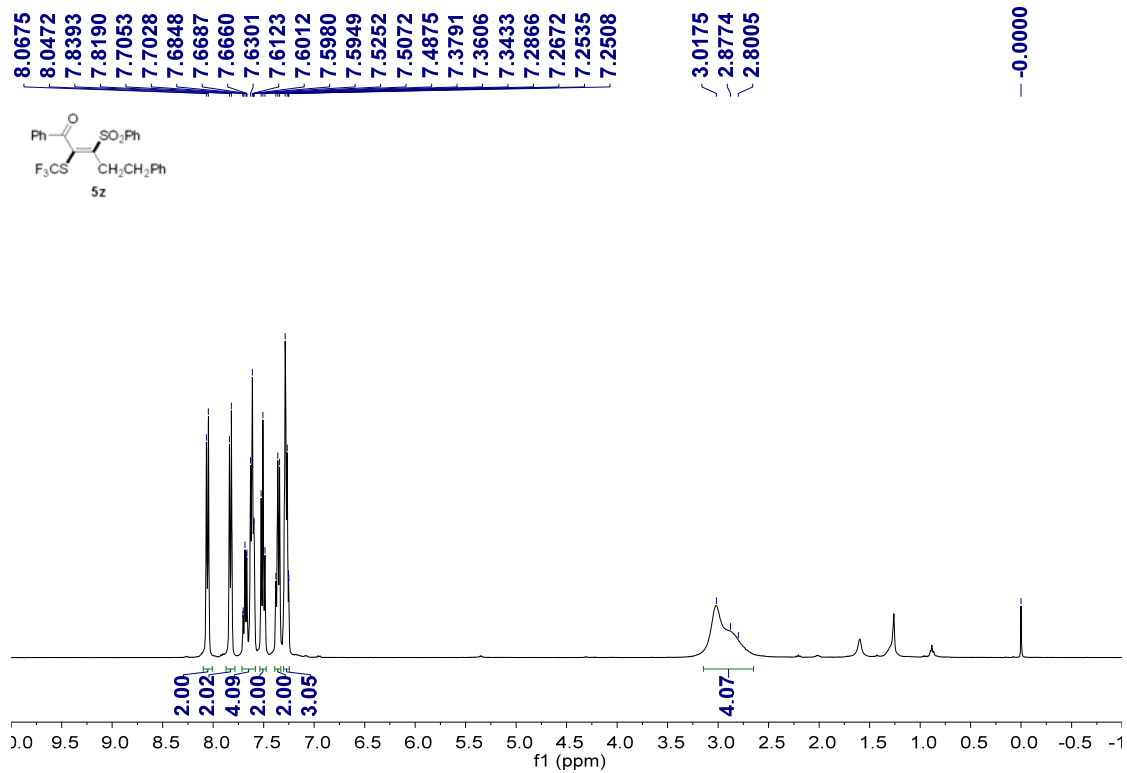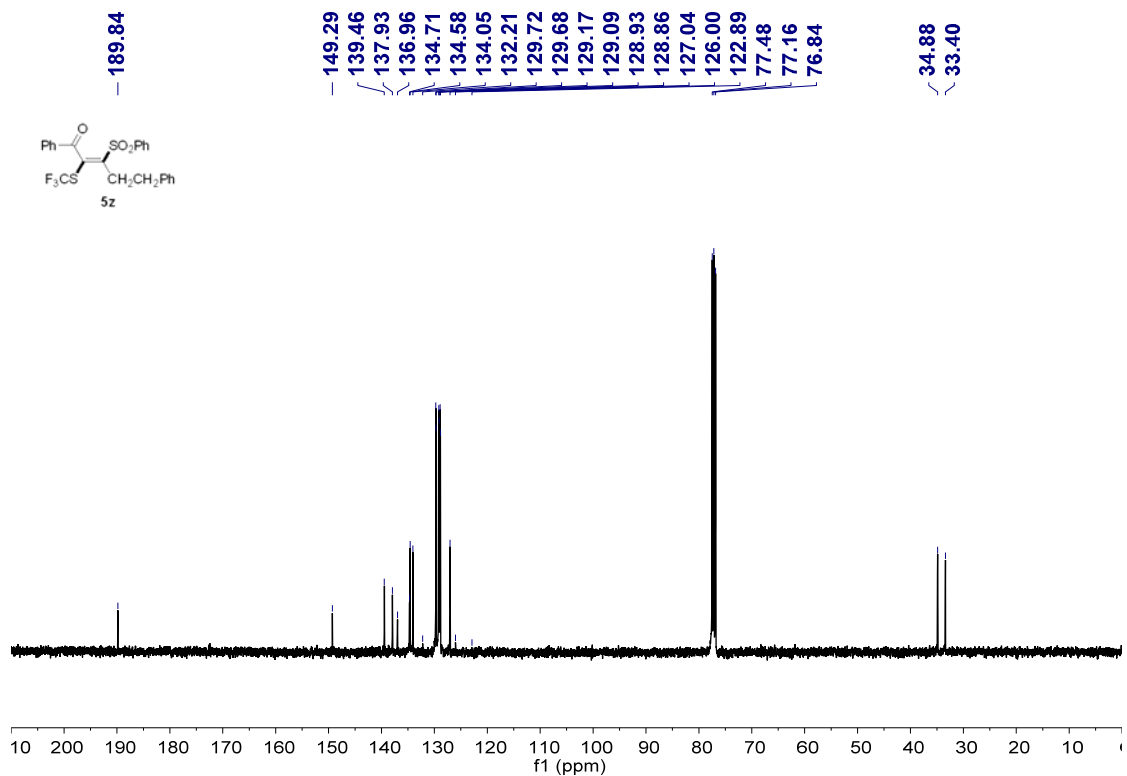

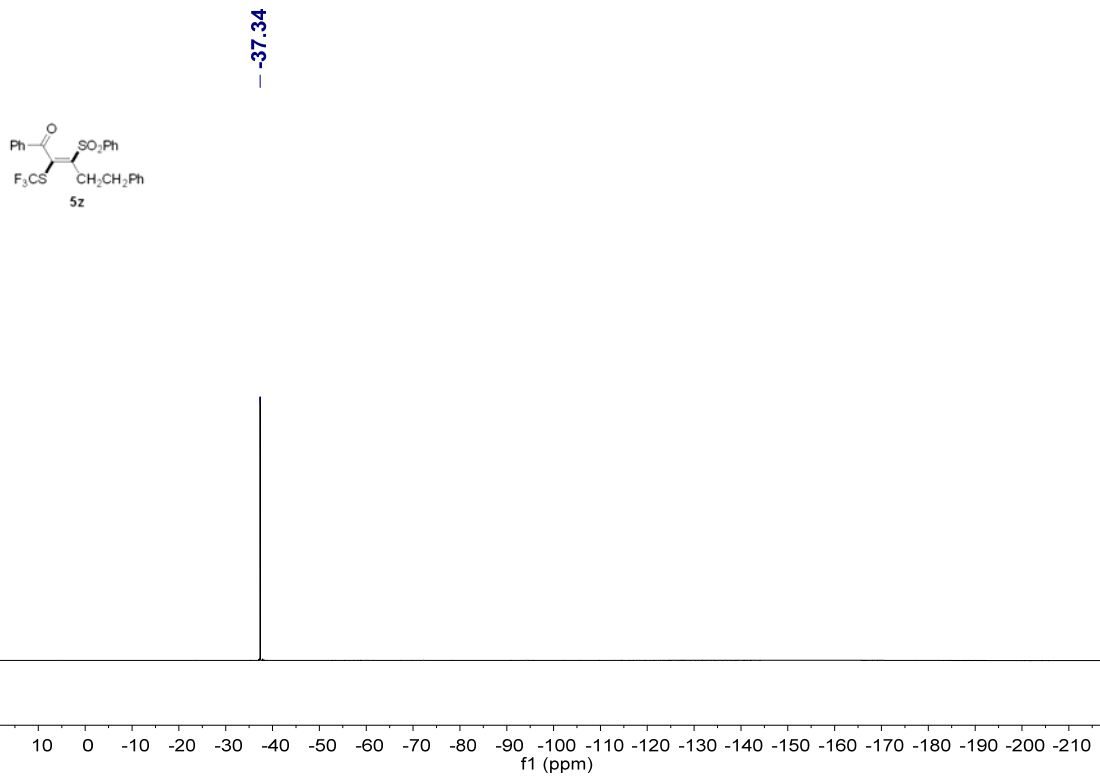

**5aa**

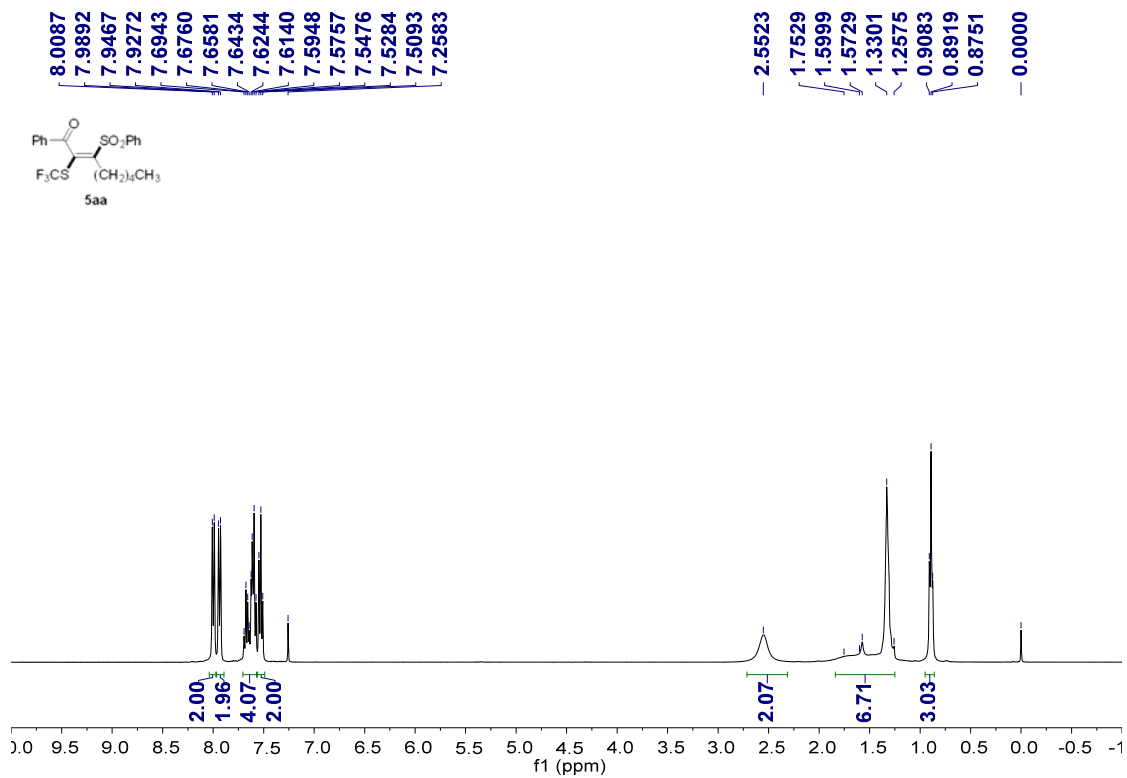

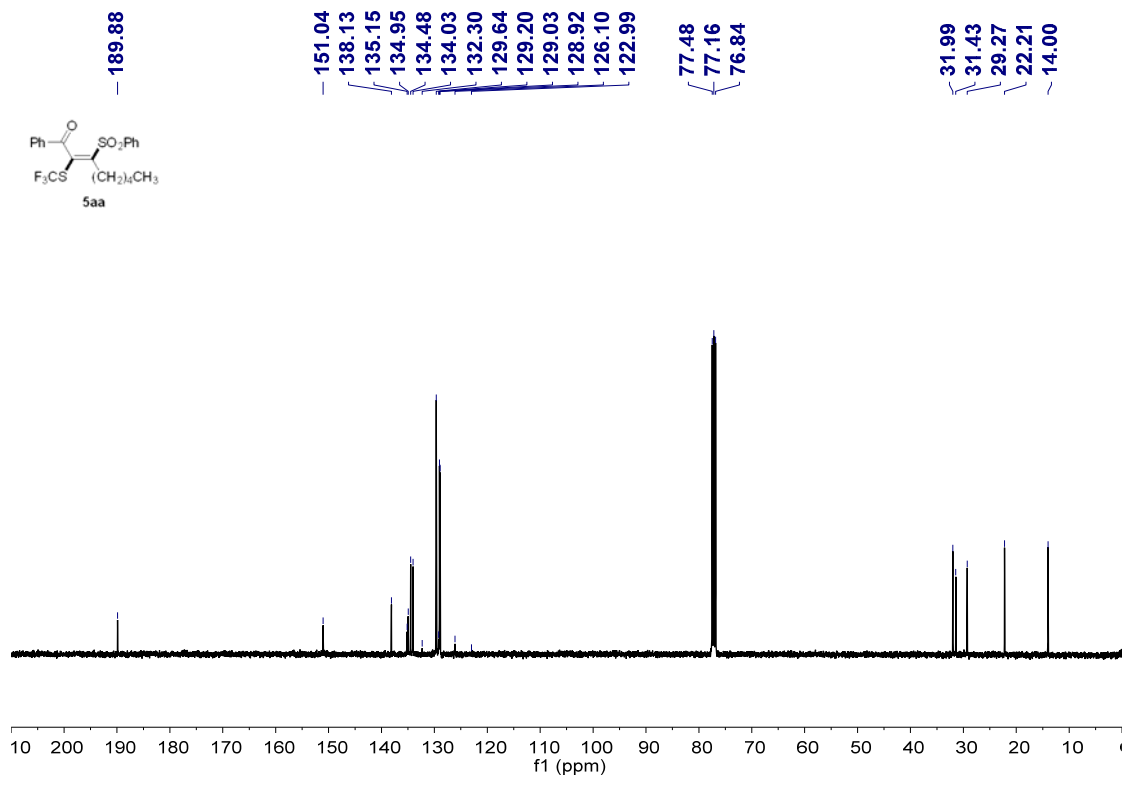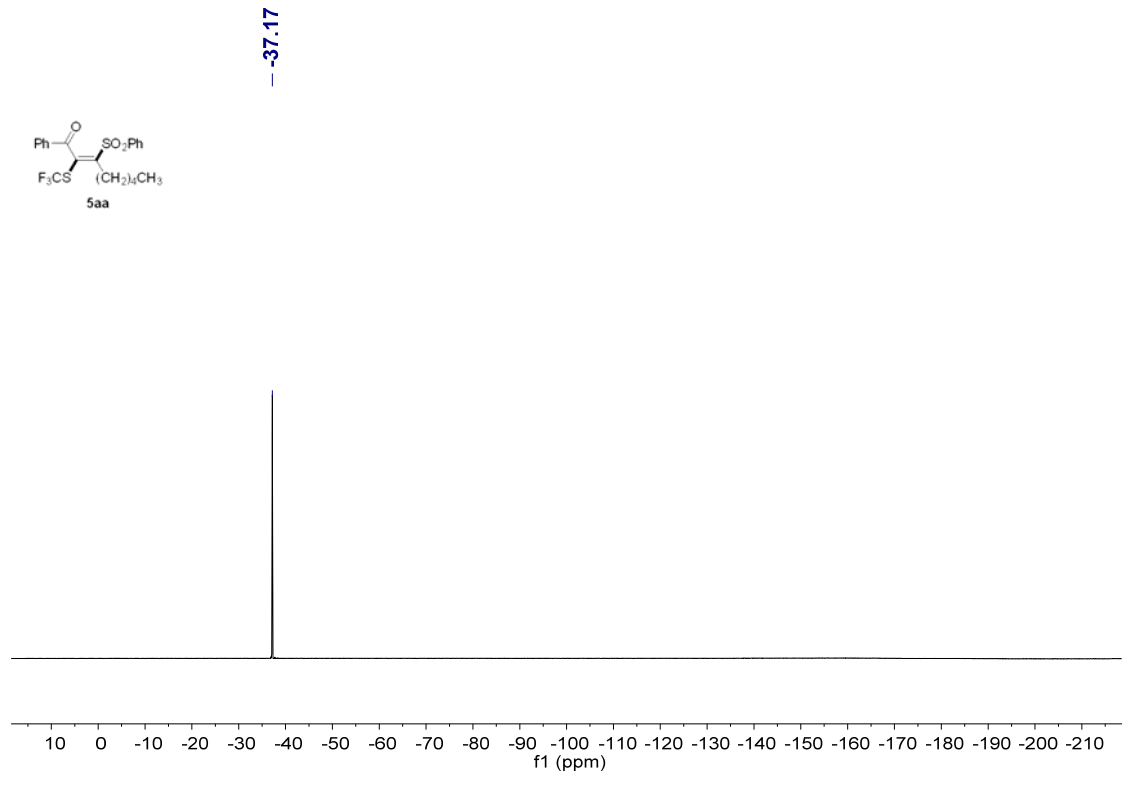

5ab

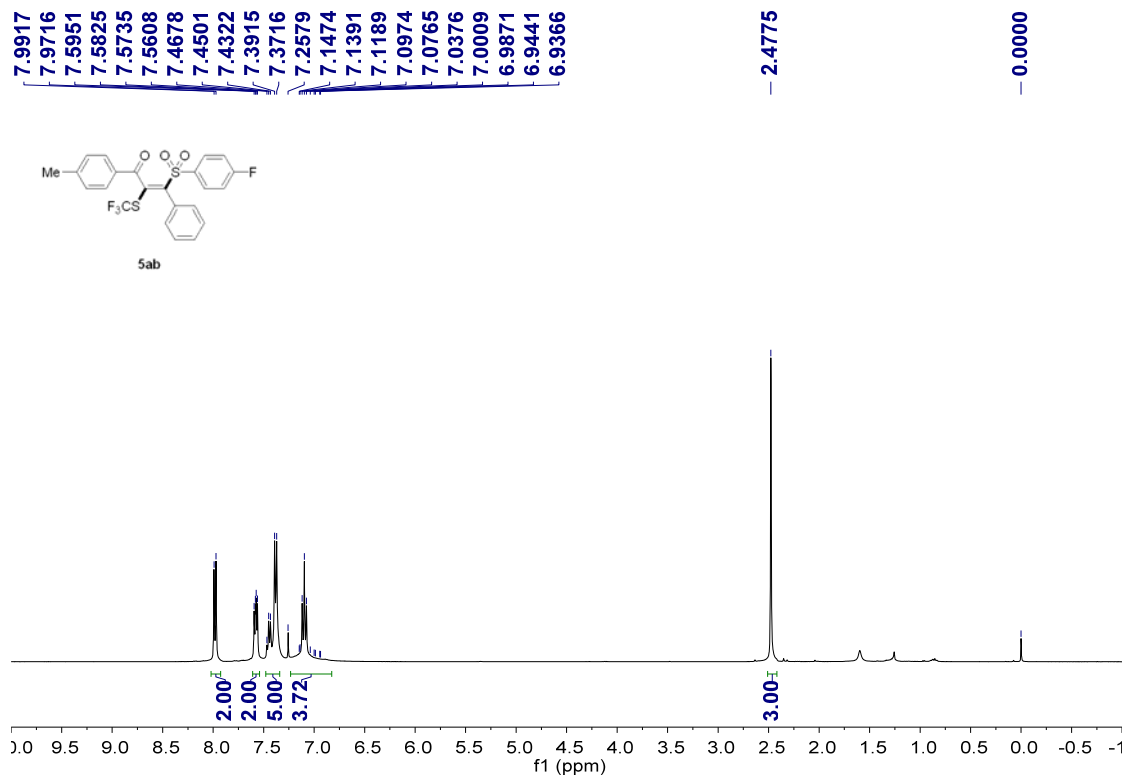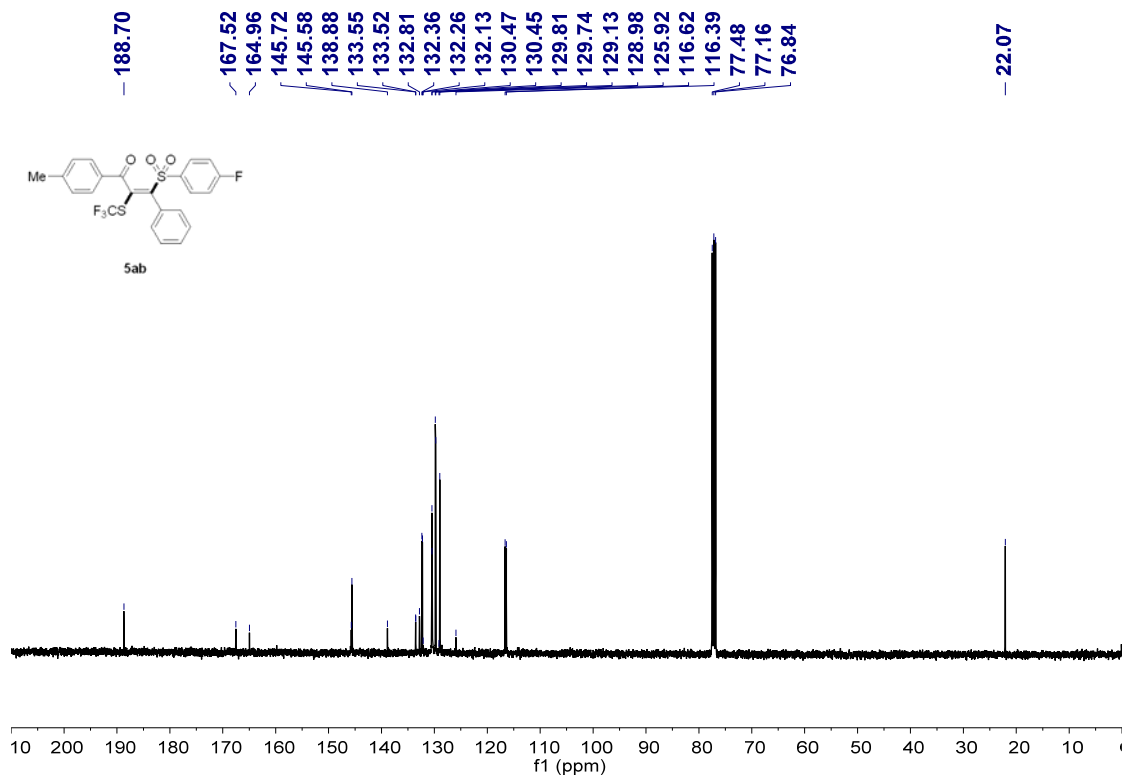

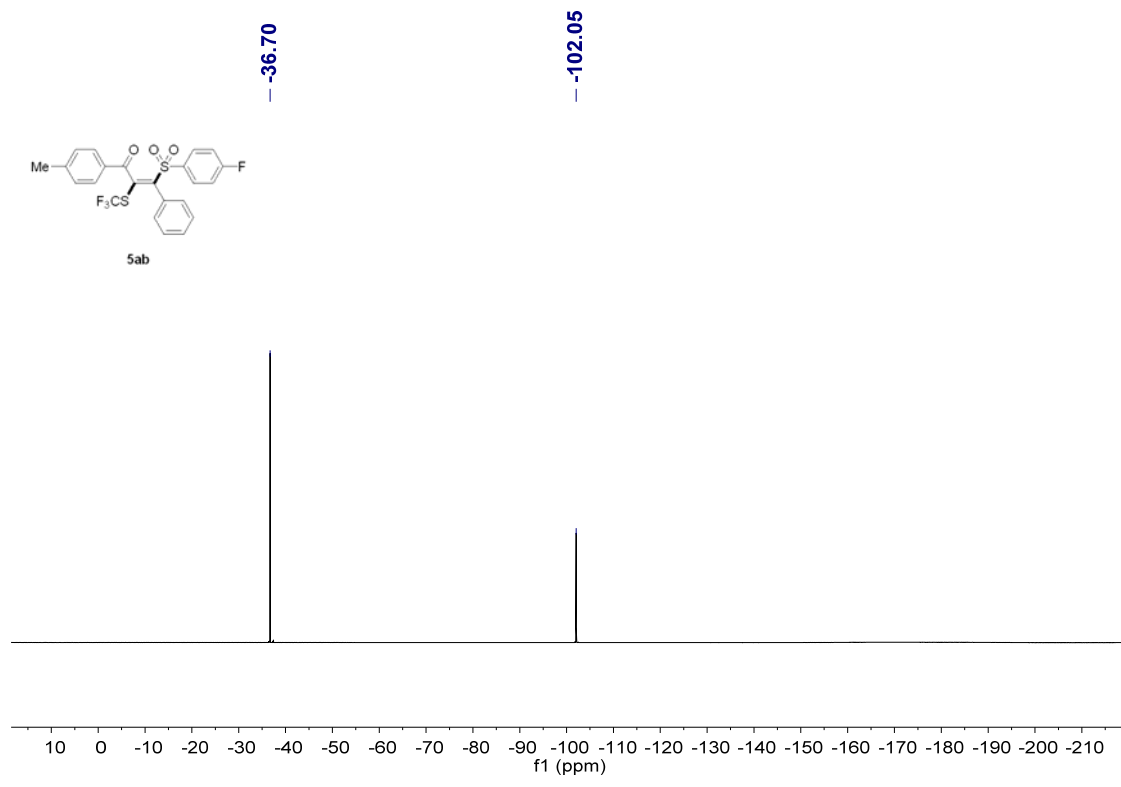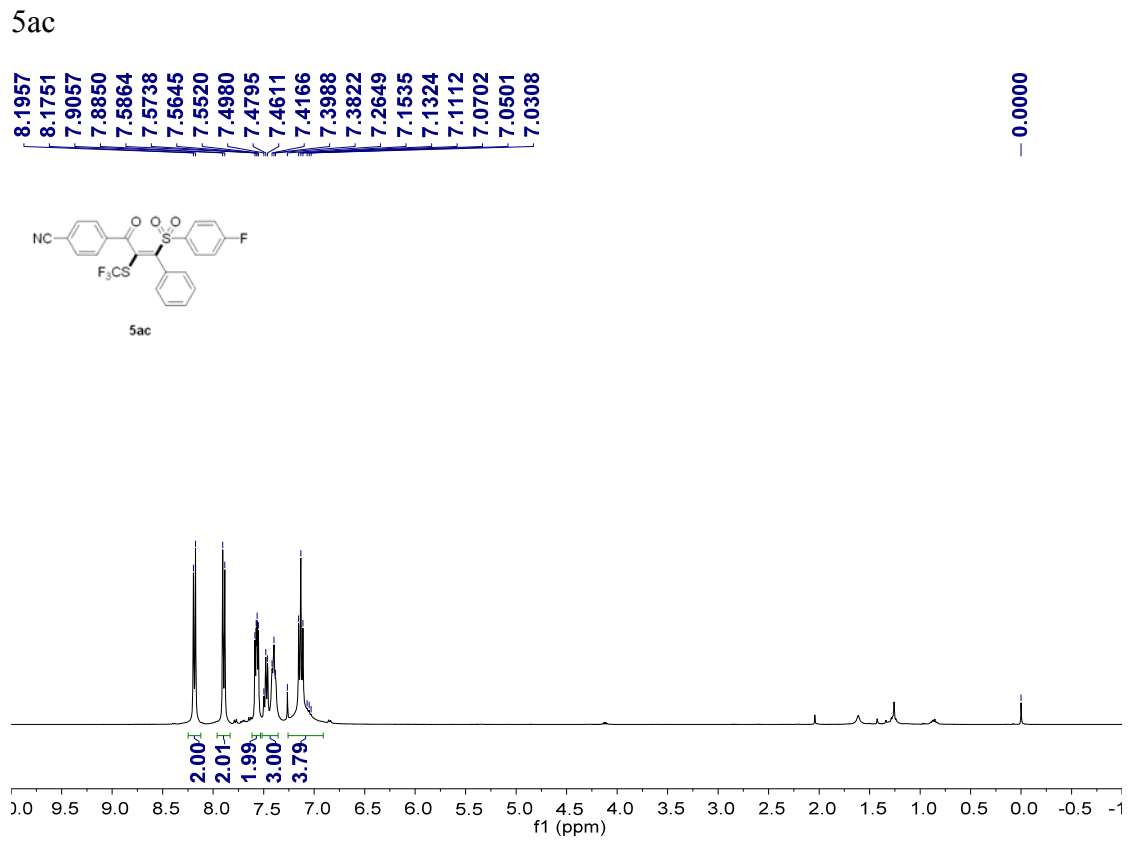

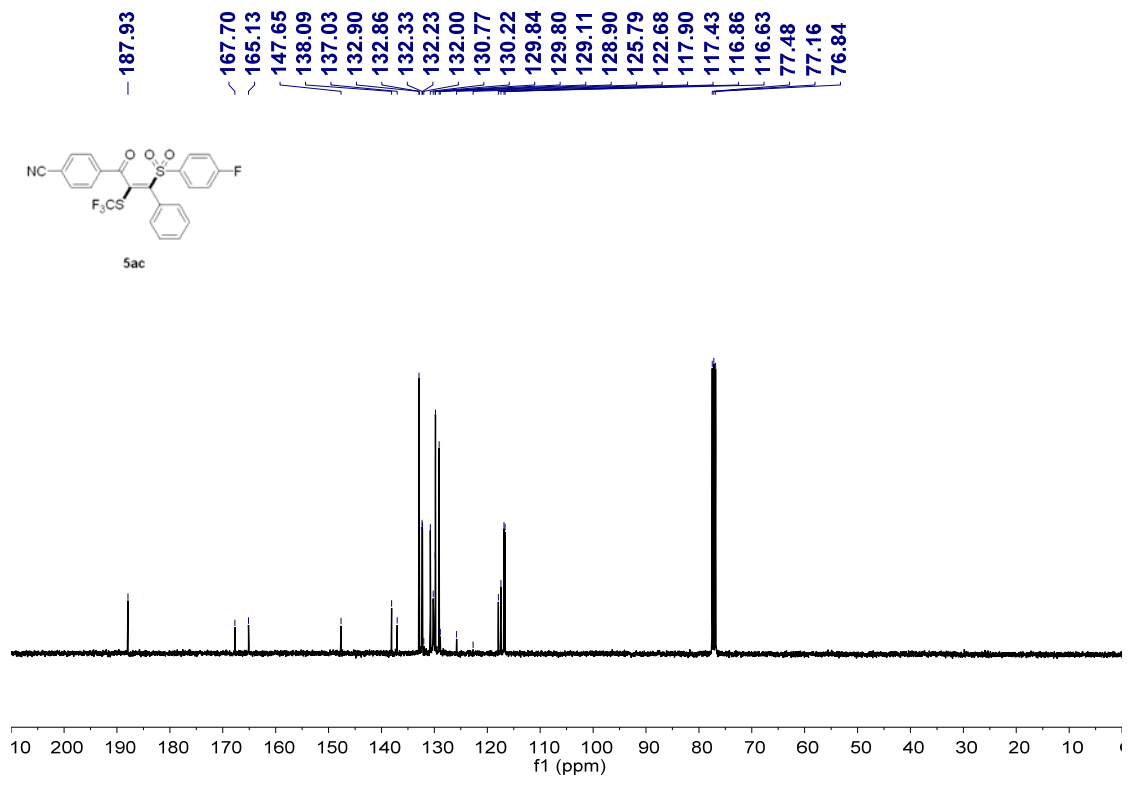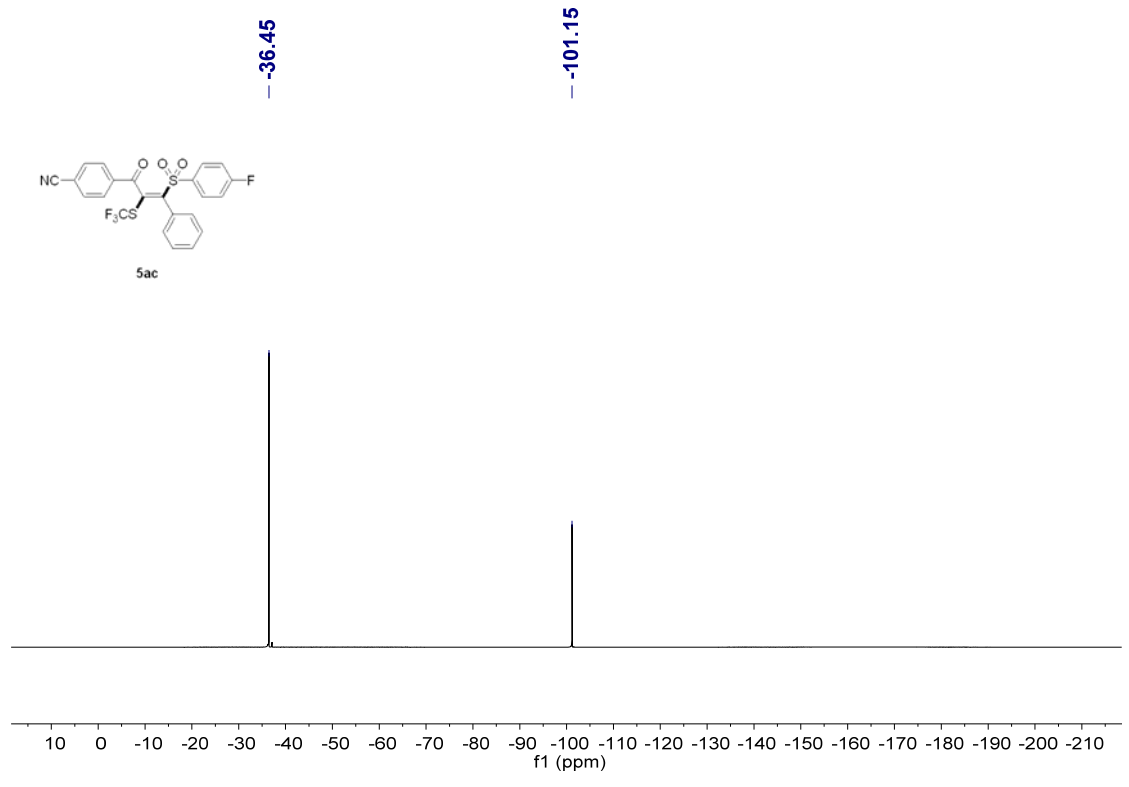

5ad

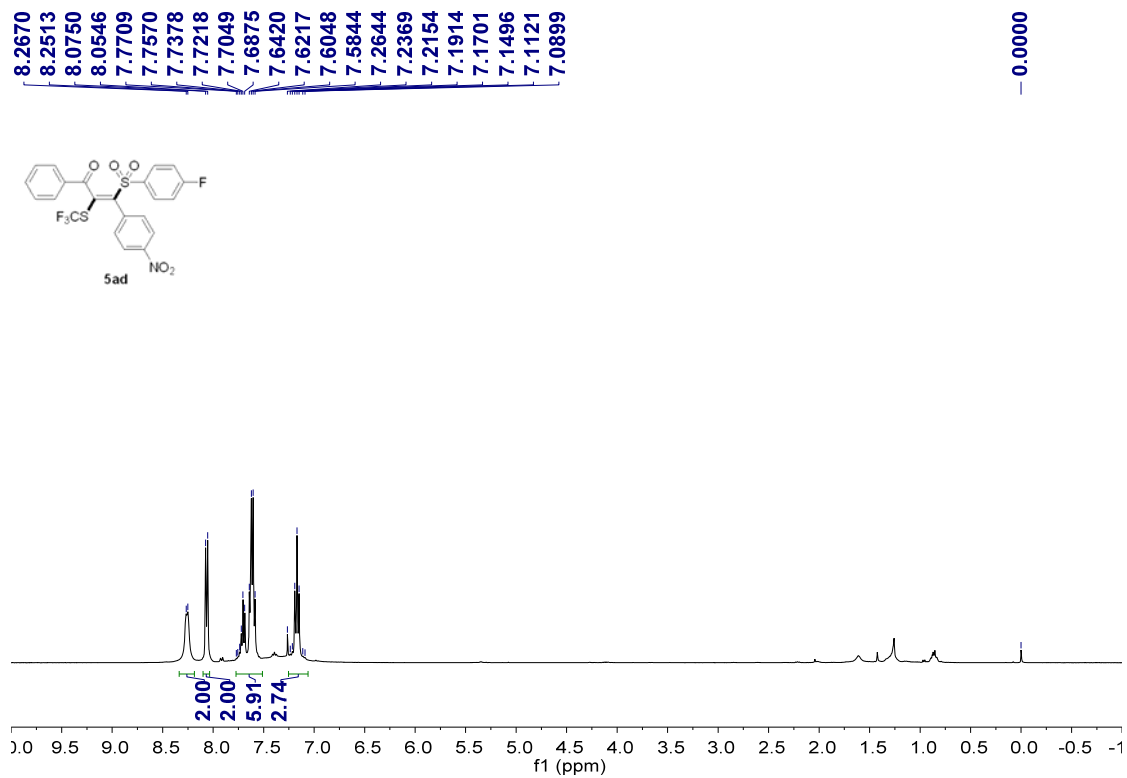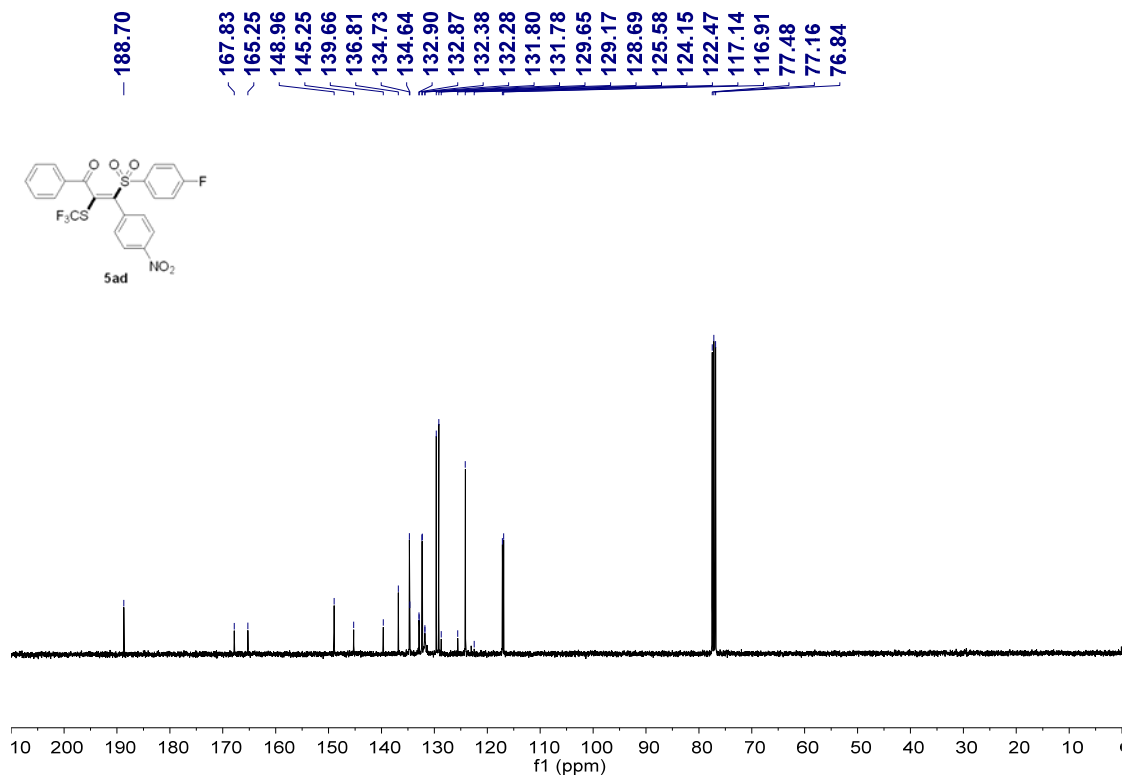

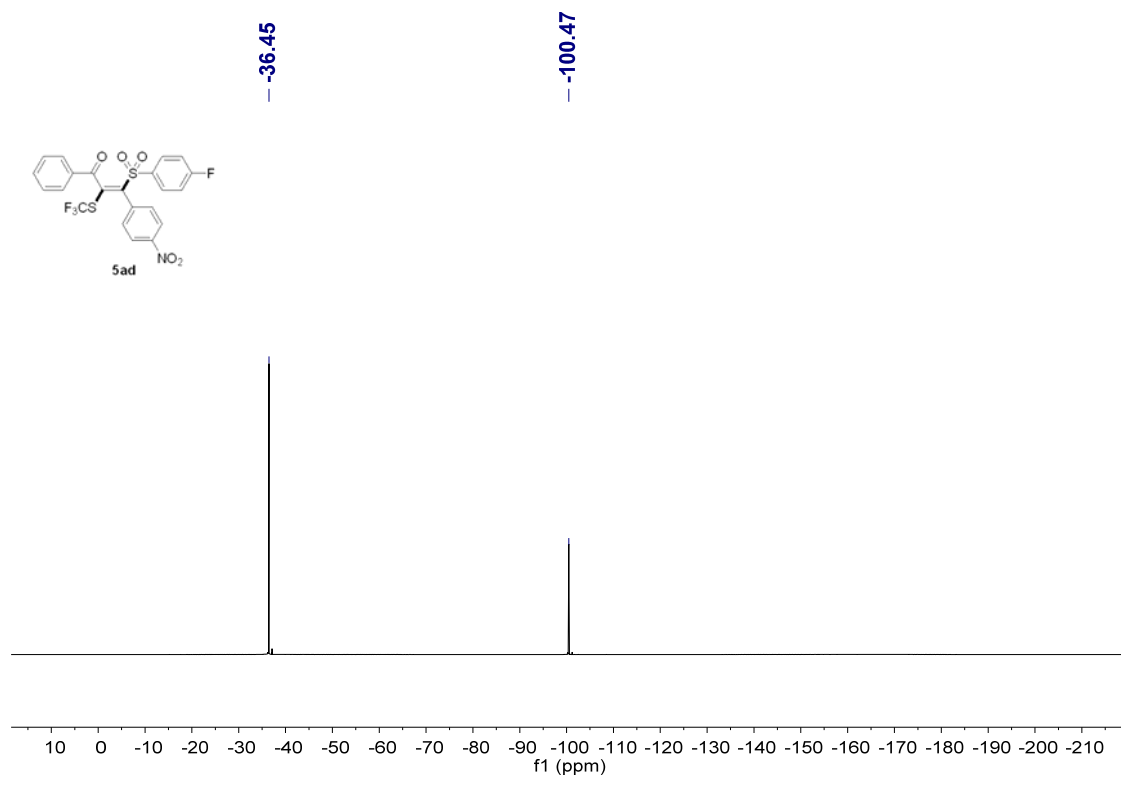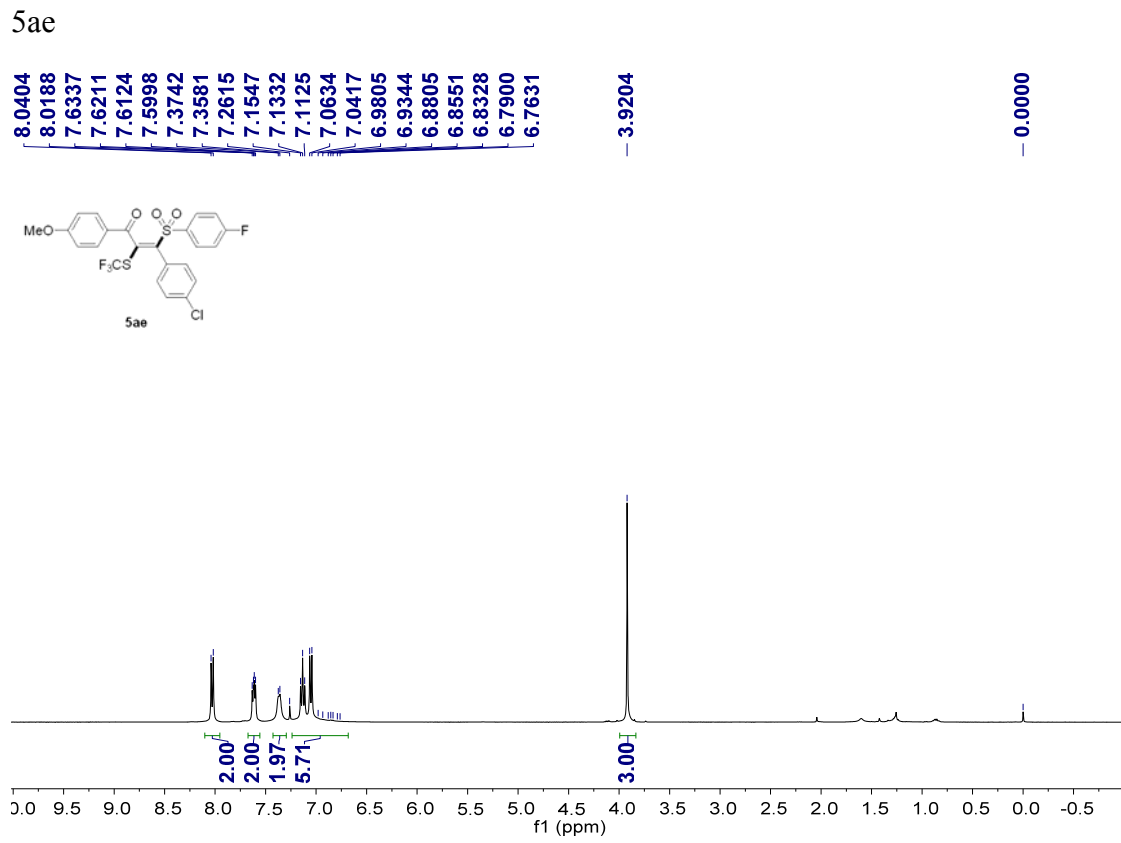



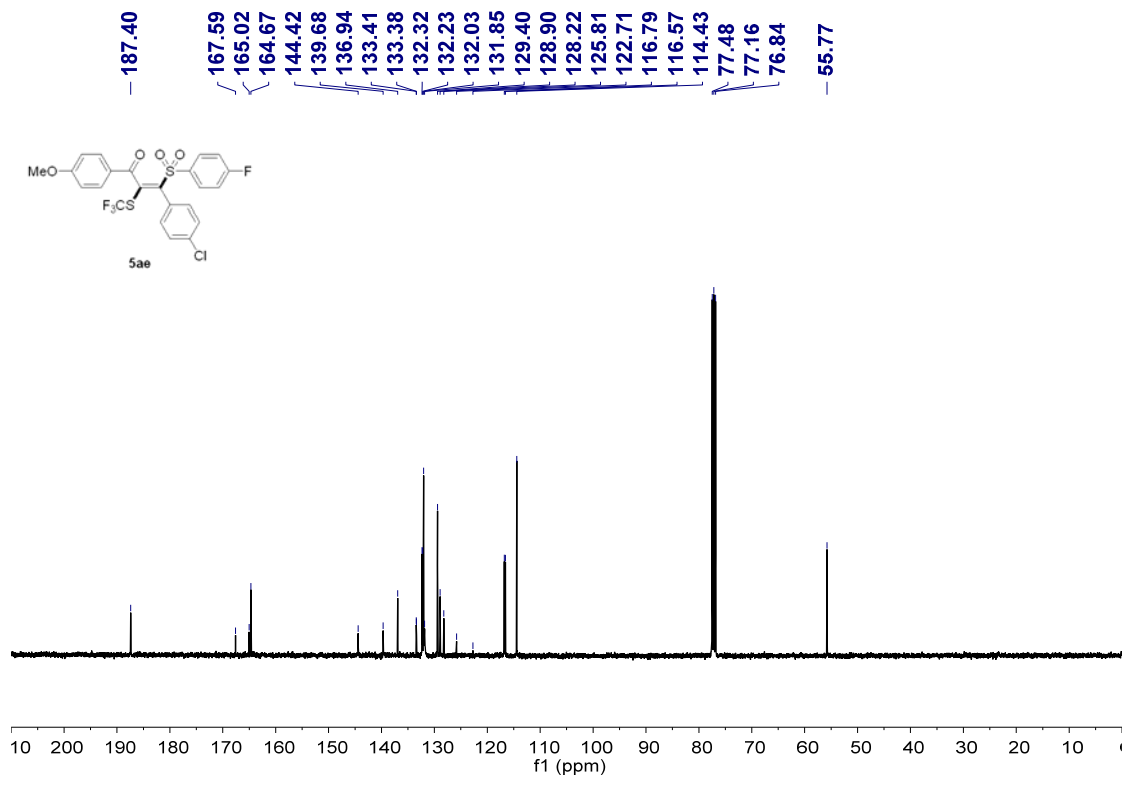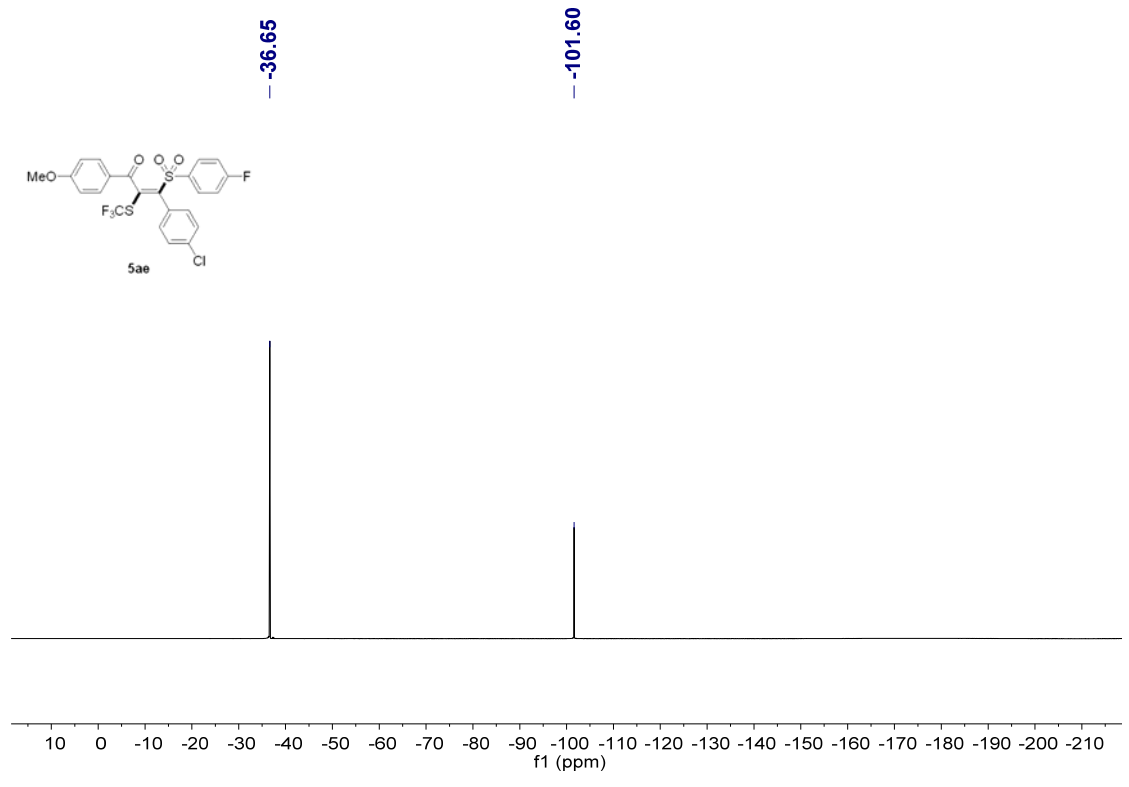

5af

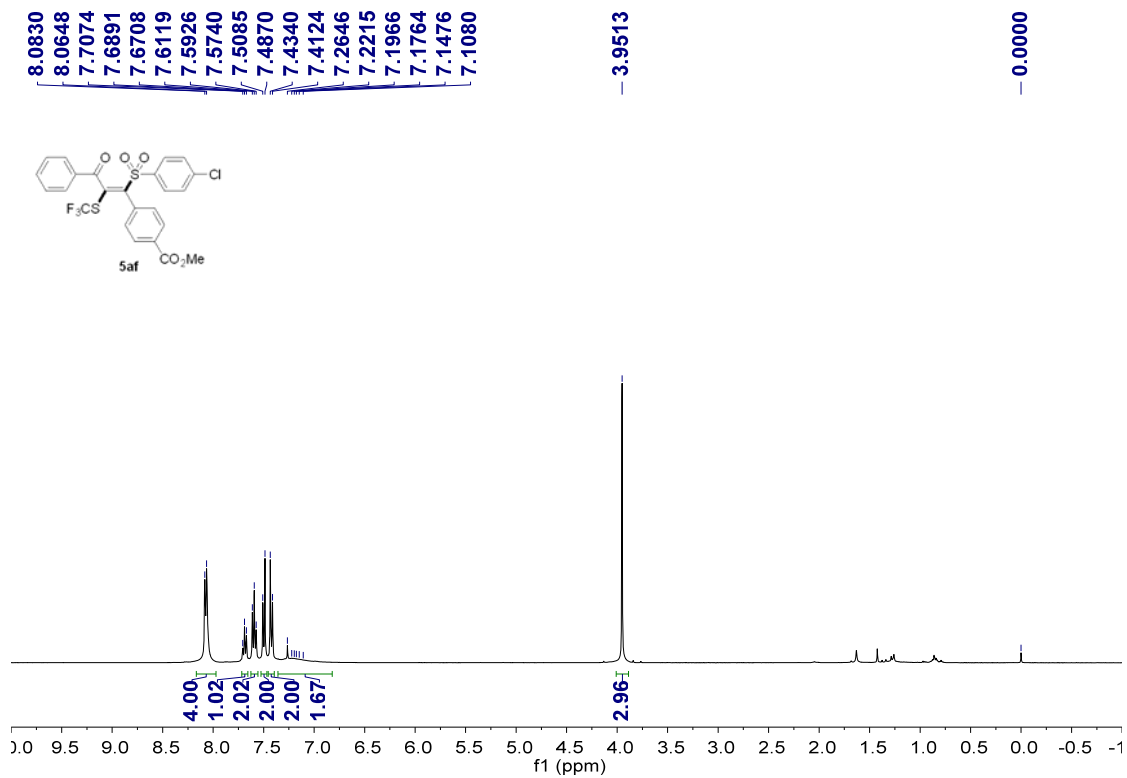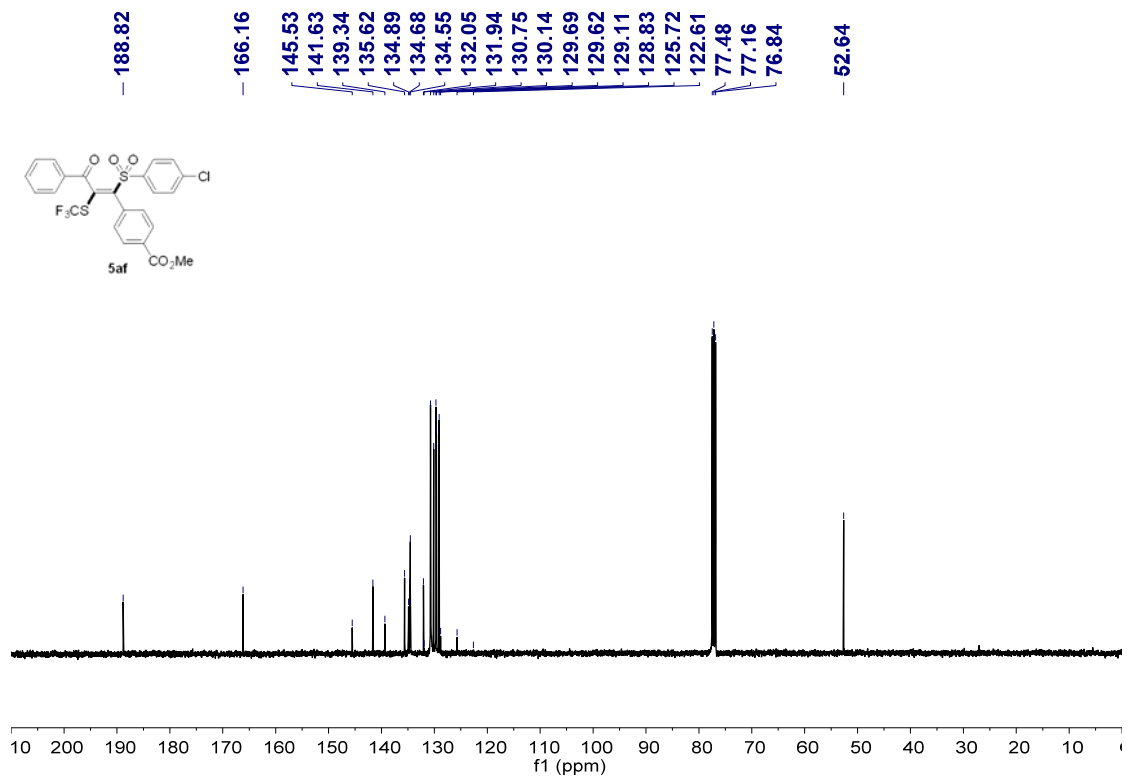

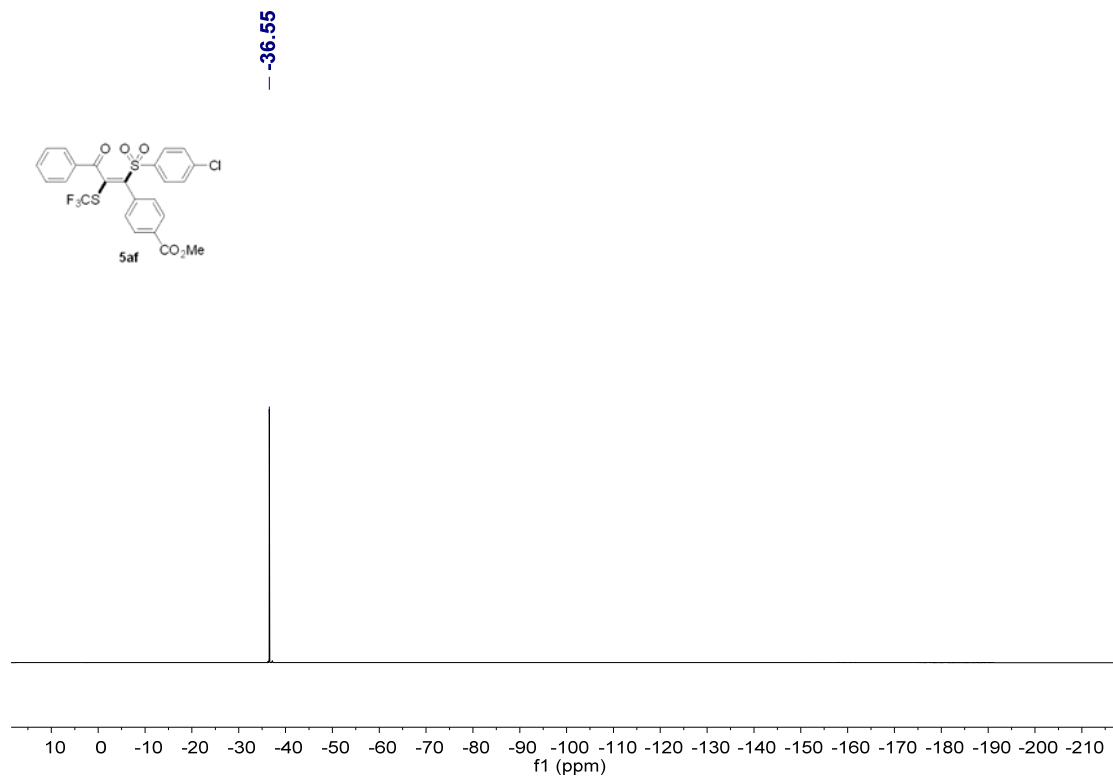

**5ag**

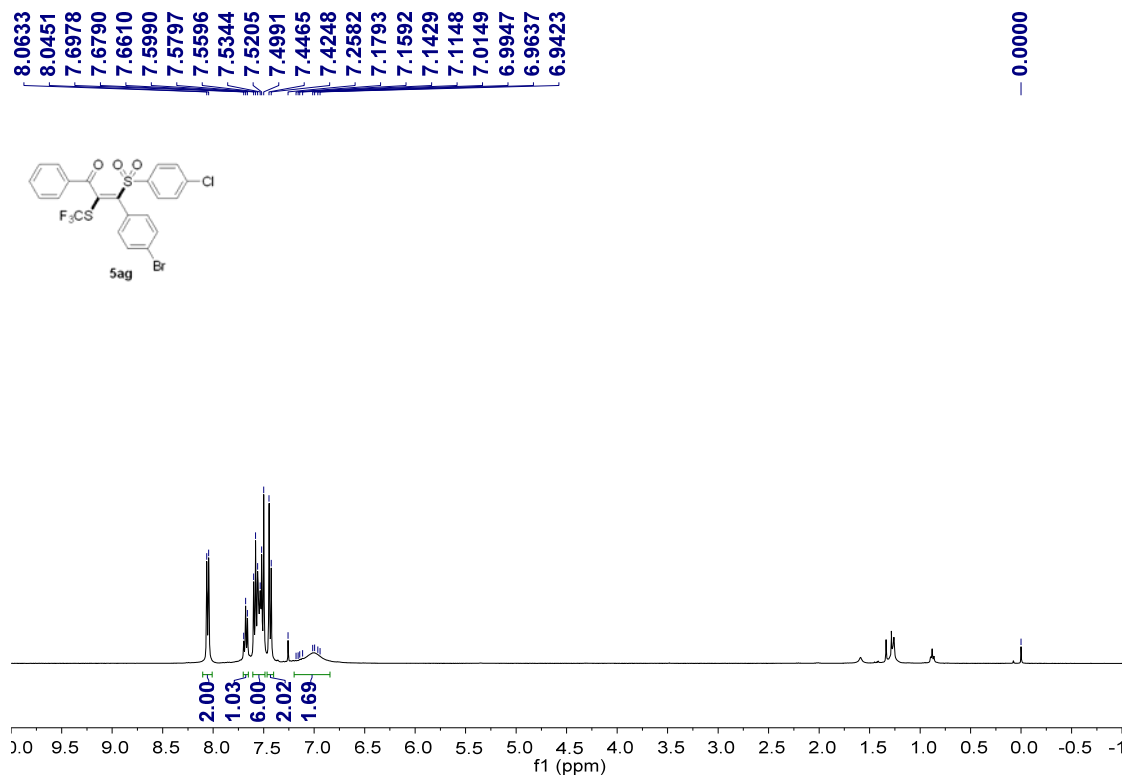

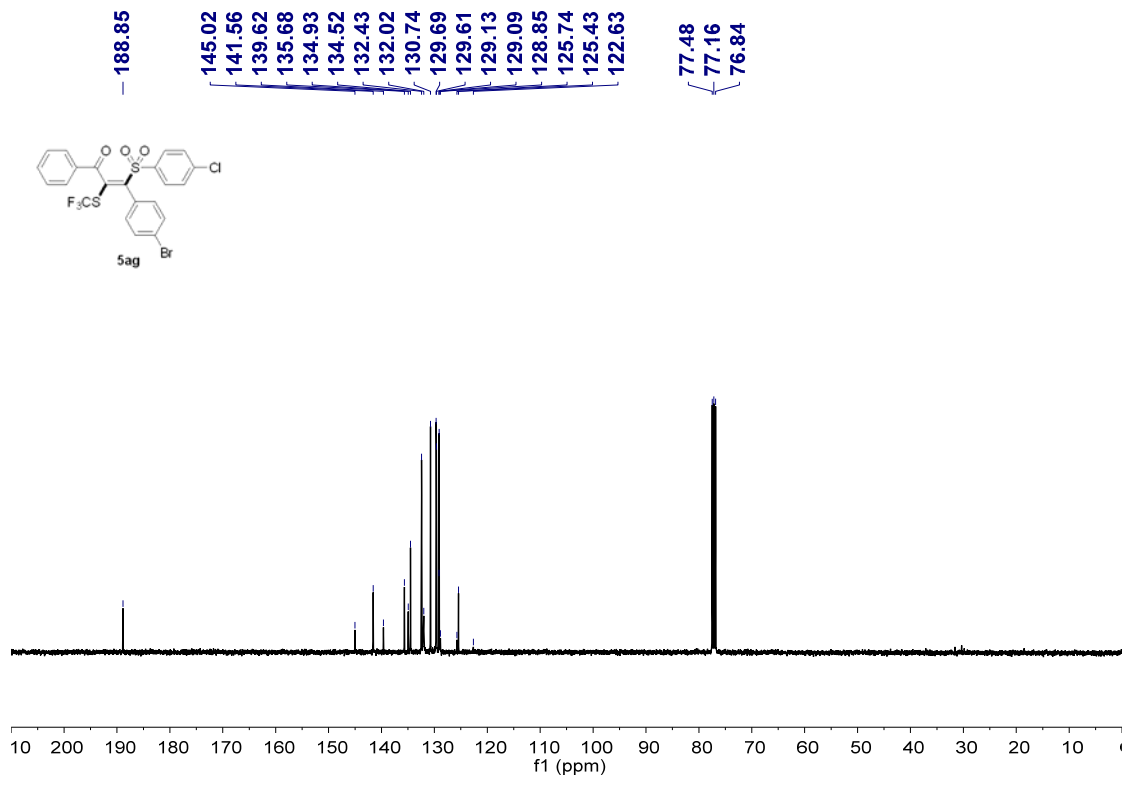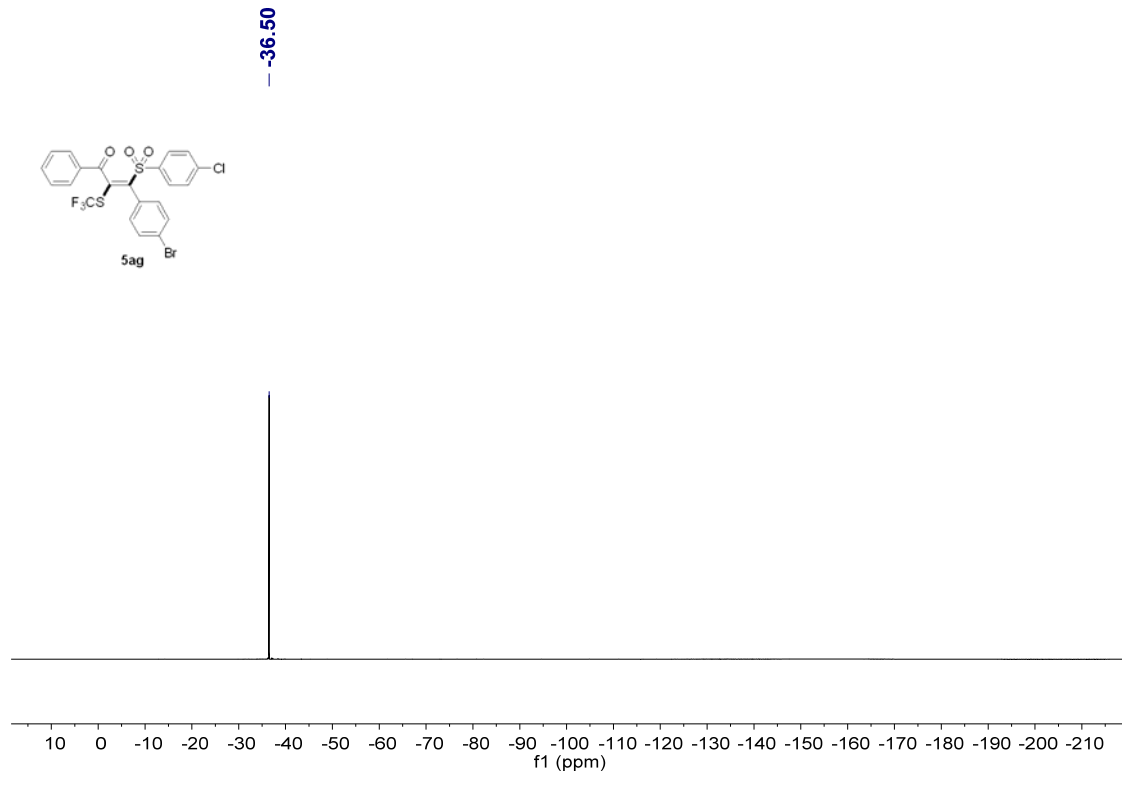

5ah

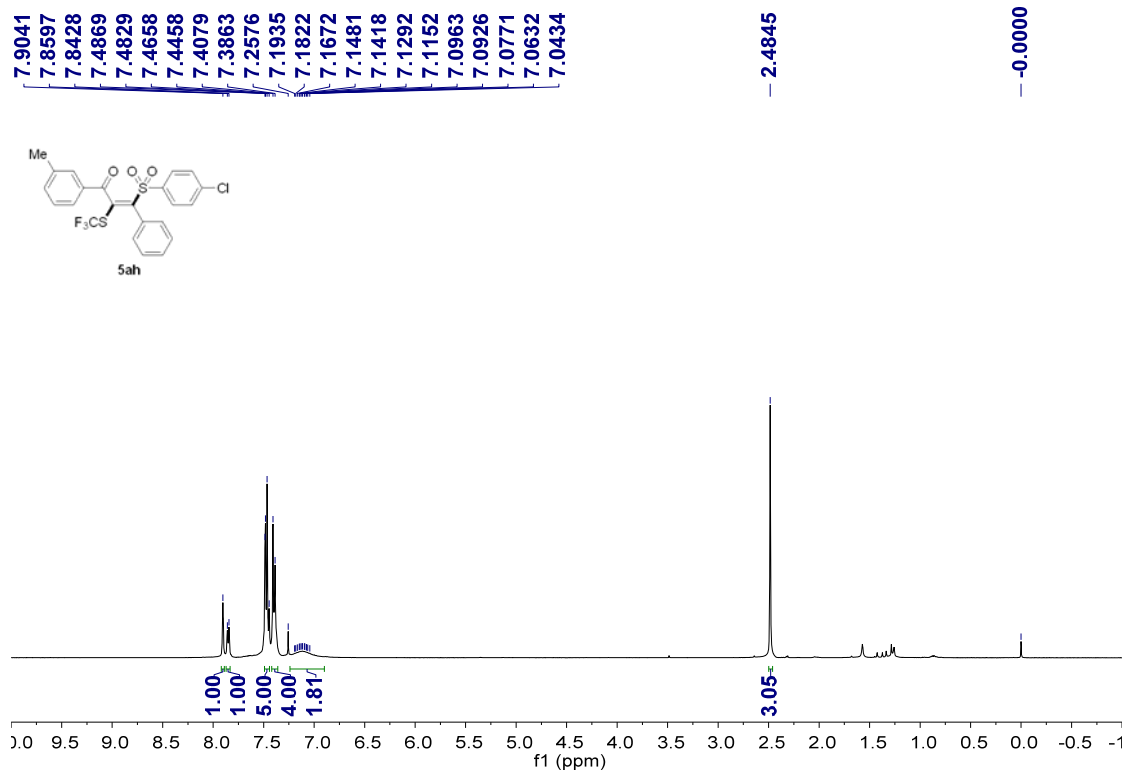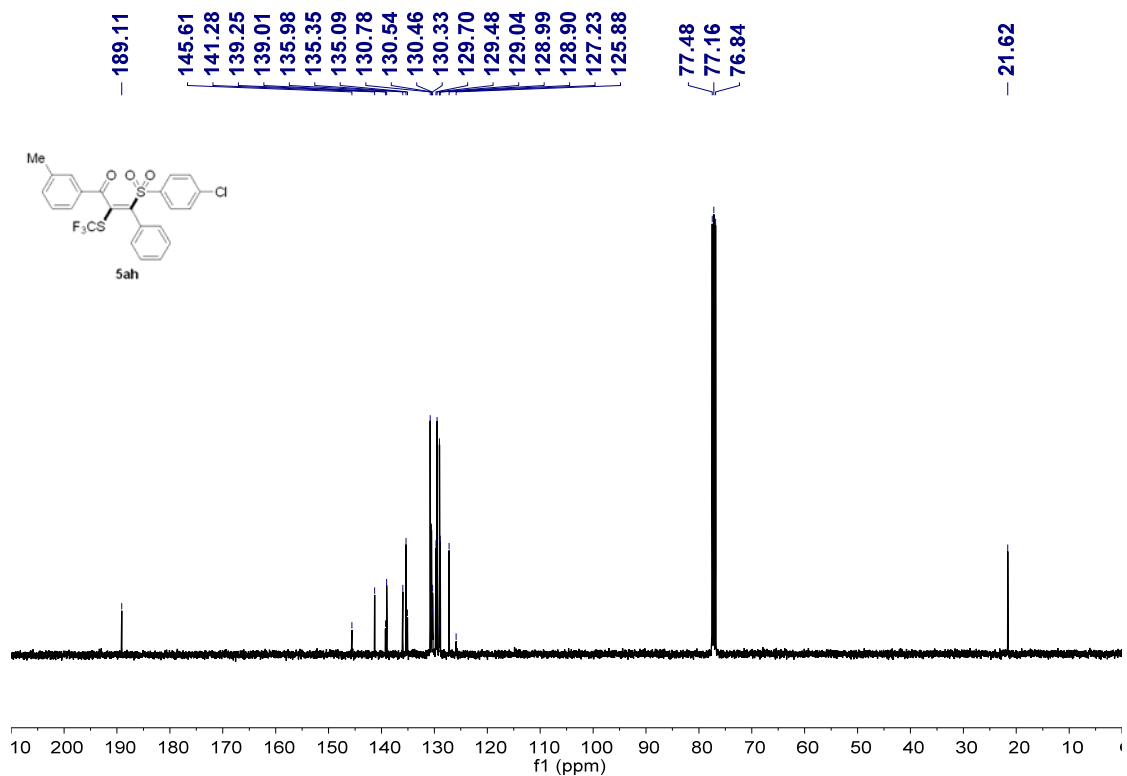

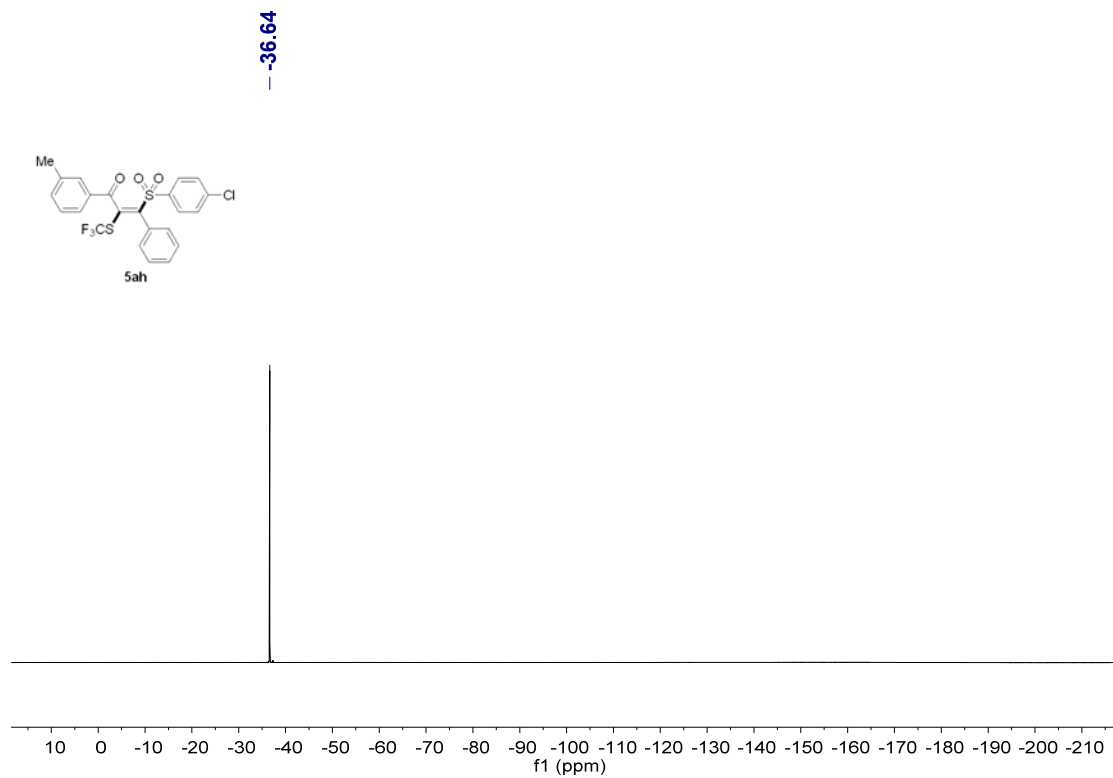

**5ai**

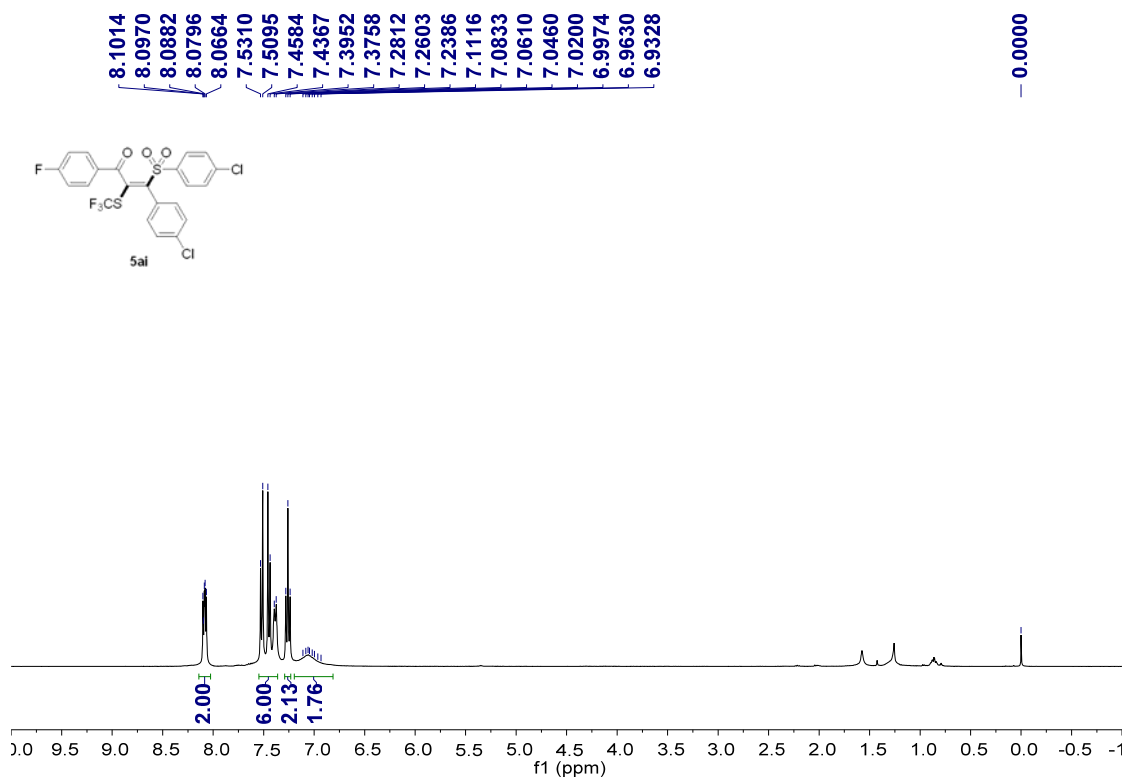

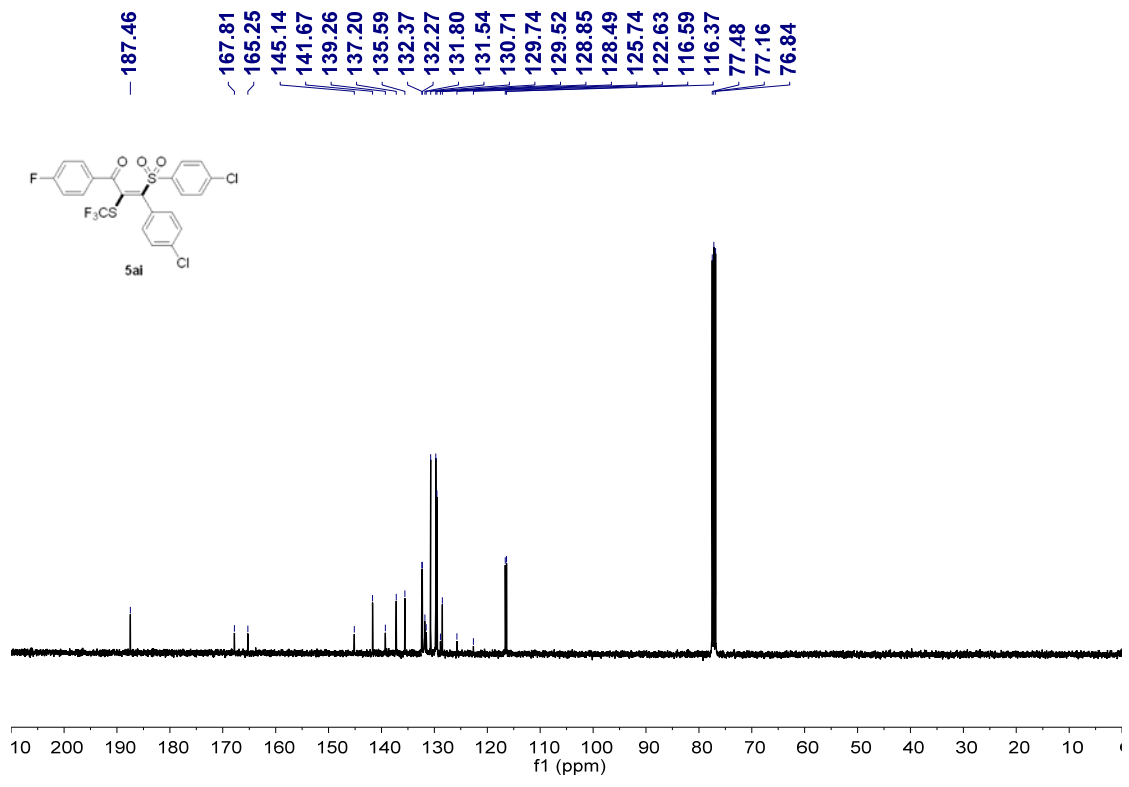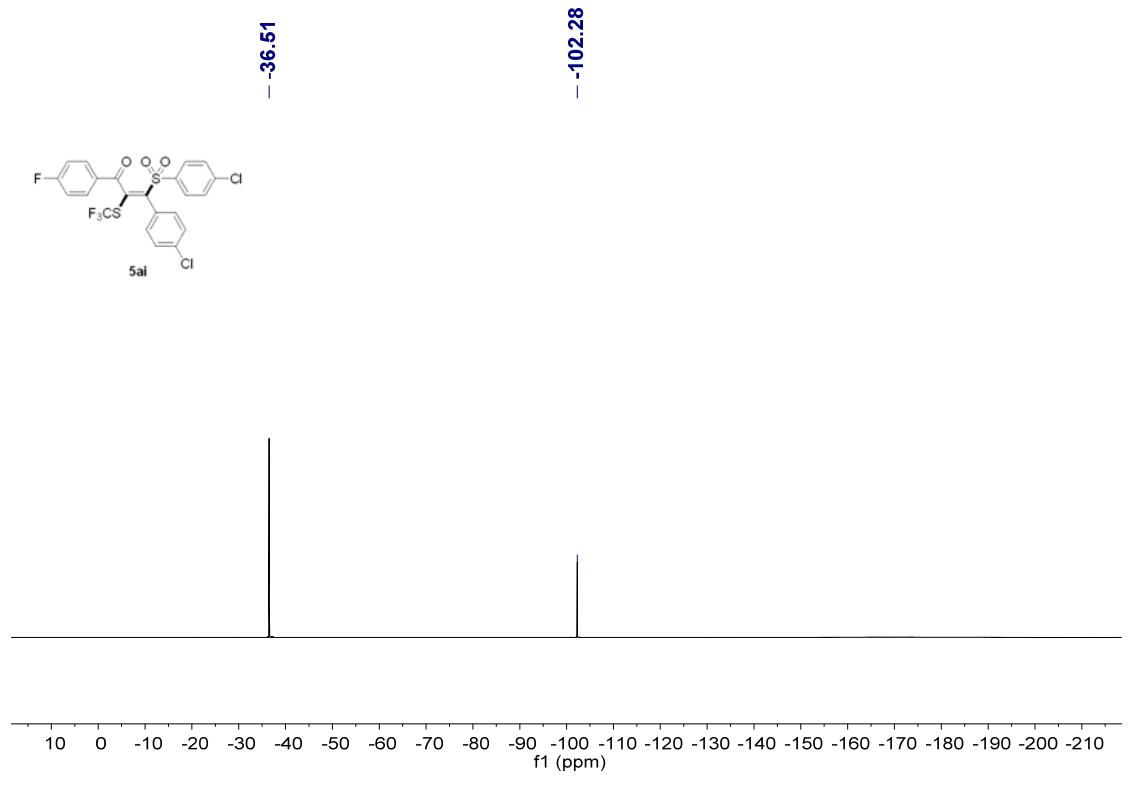

5aj

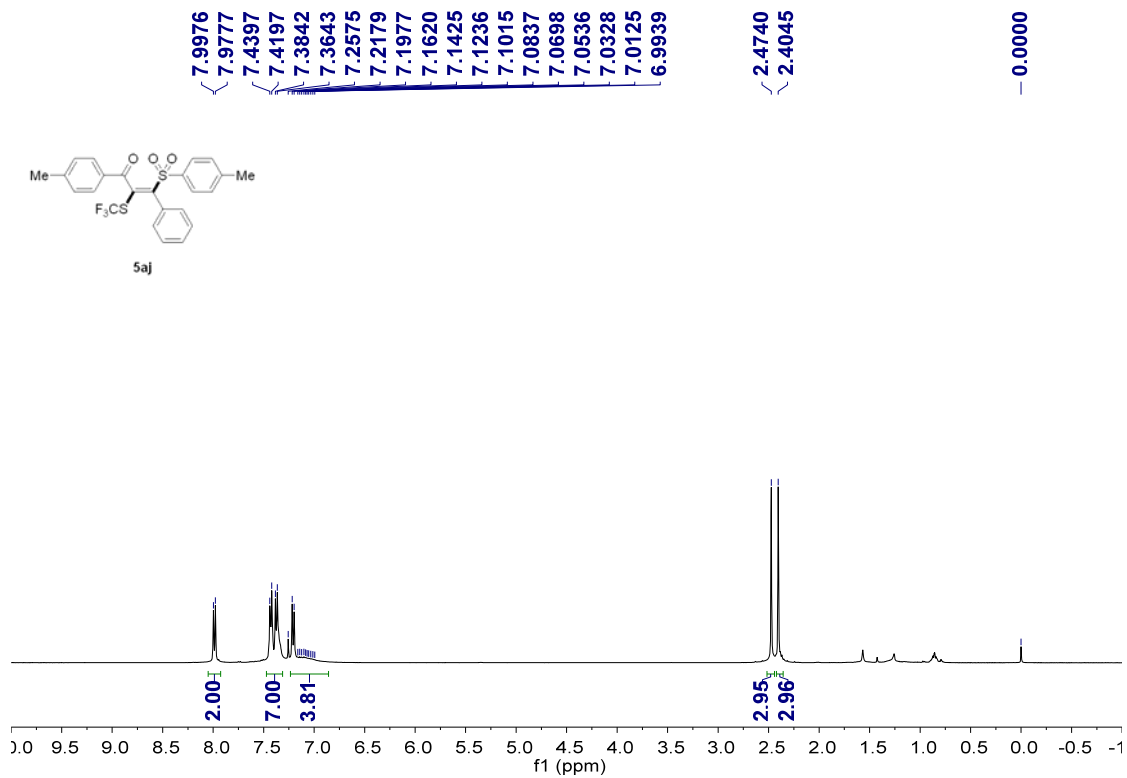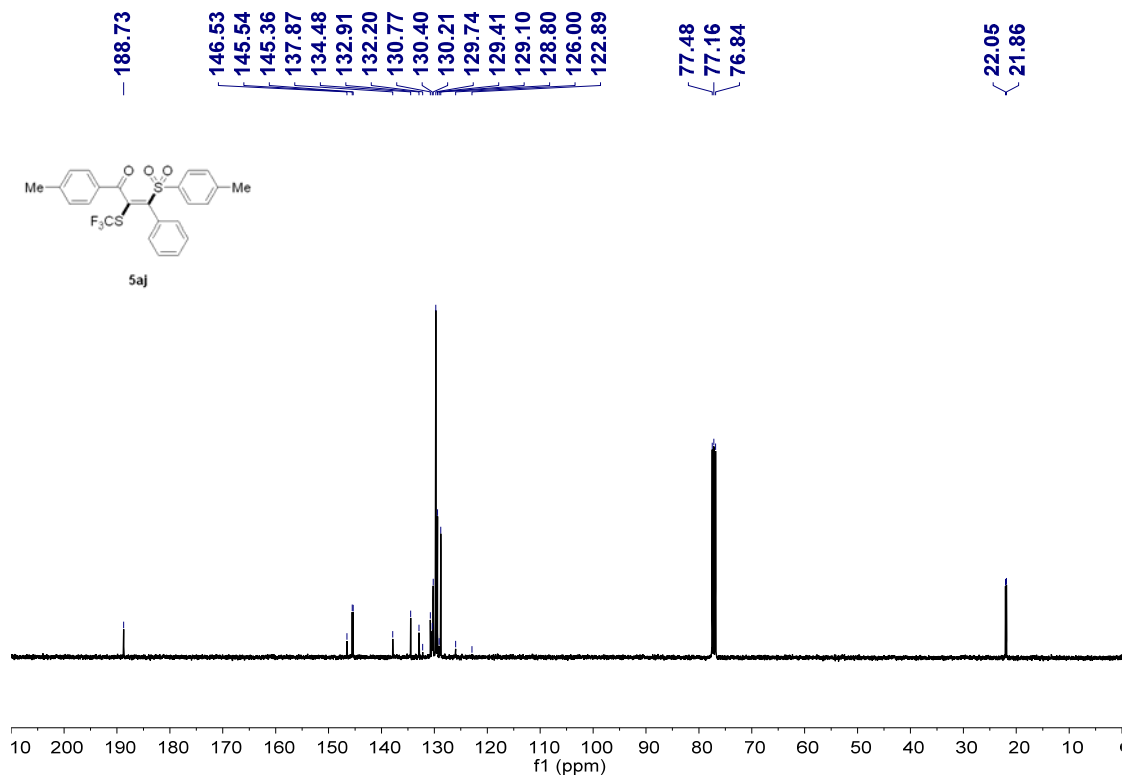



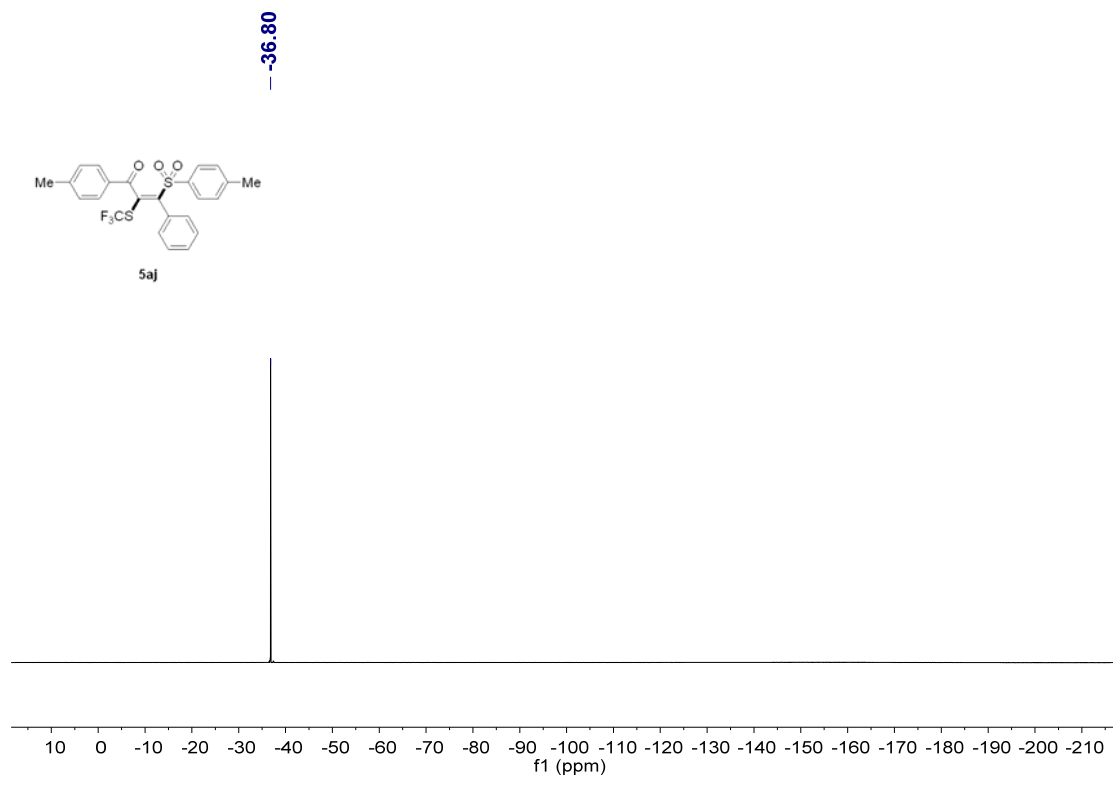

5ak

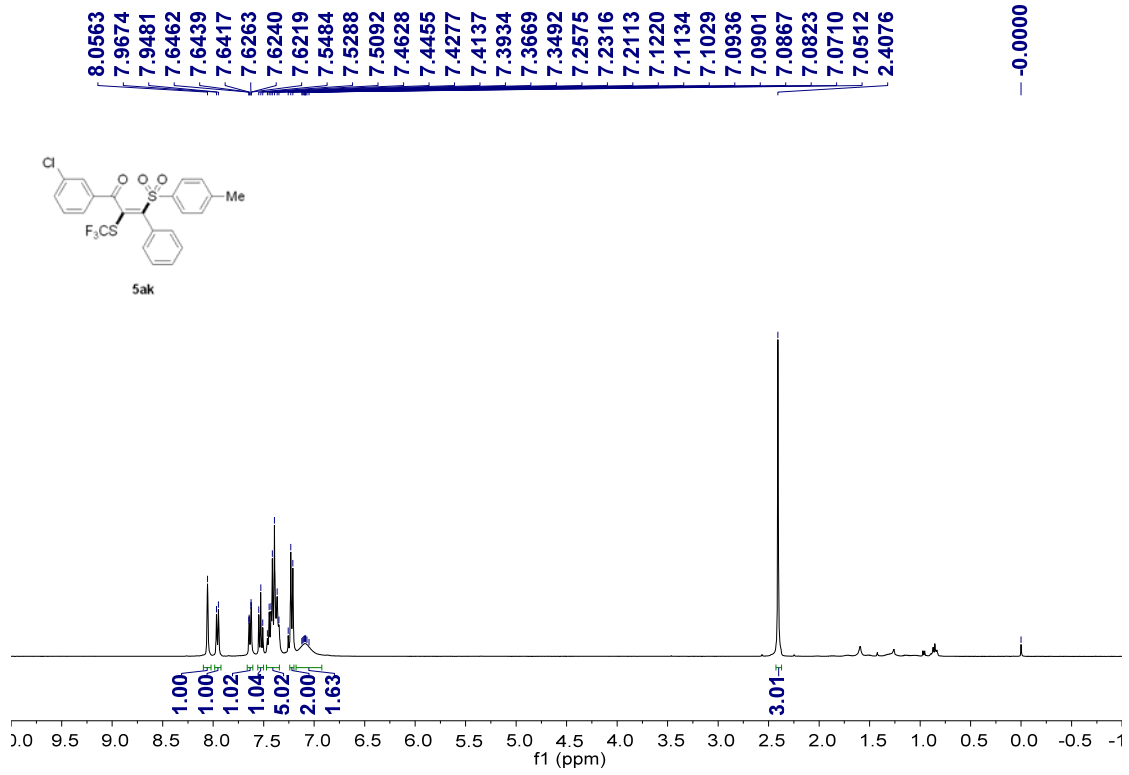

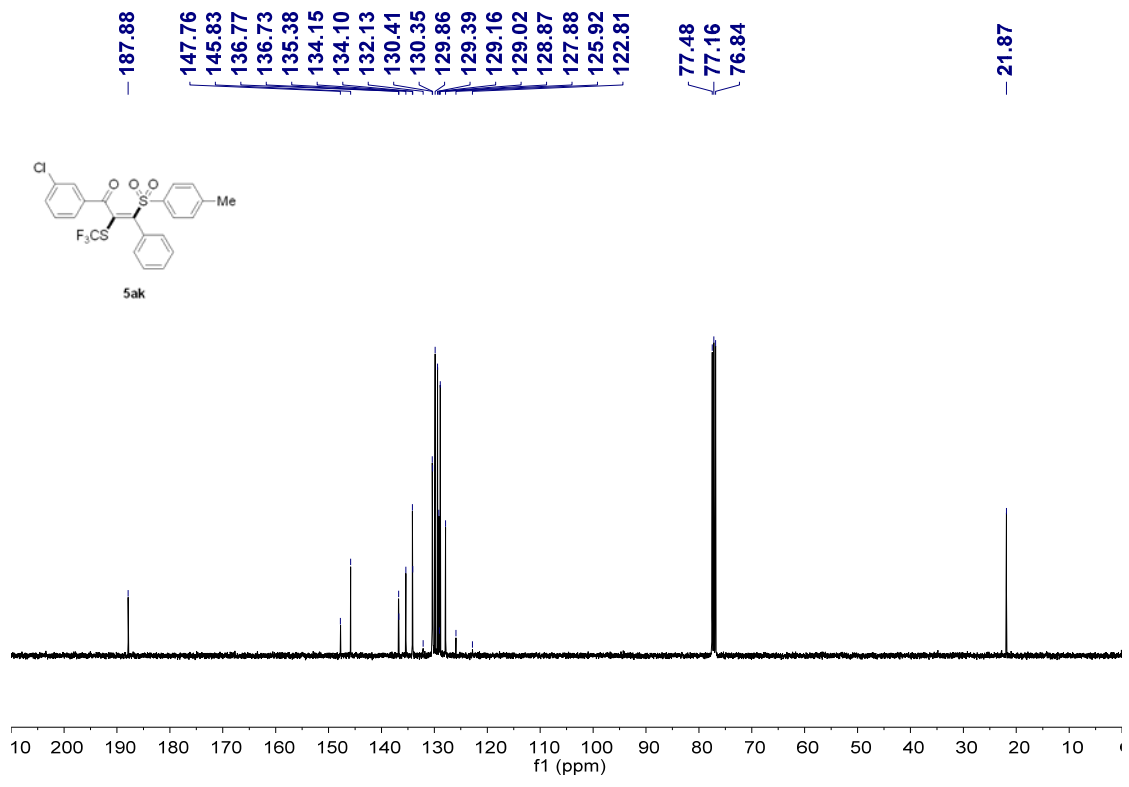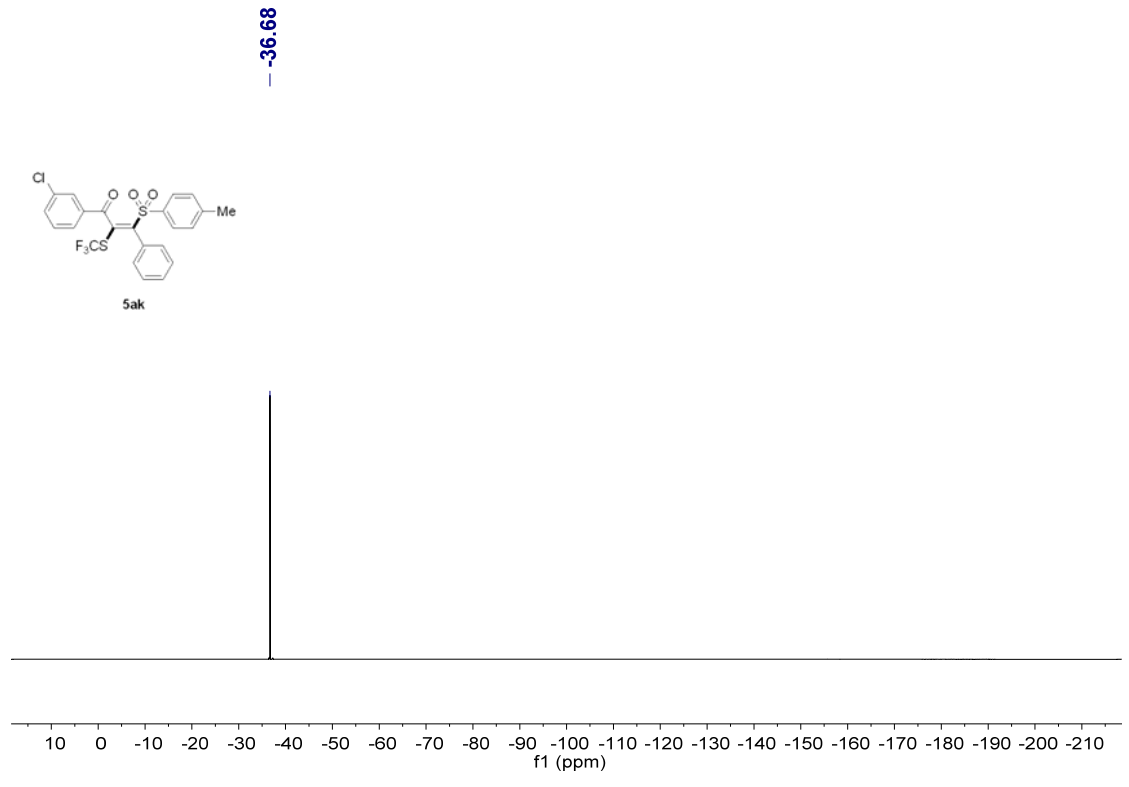

5al

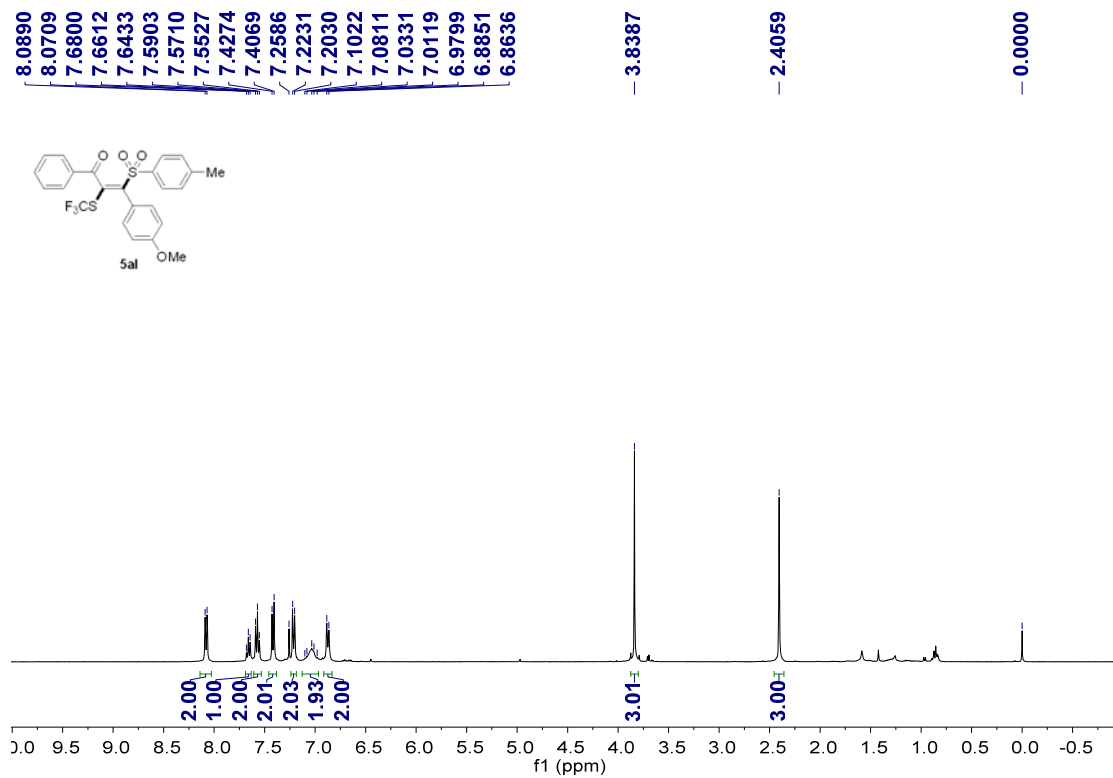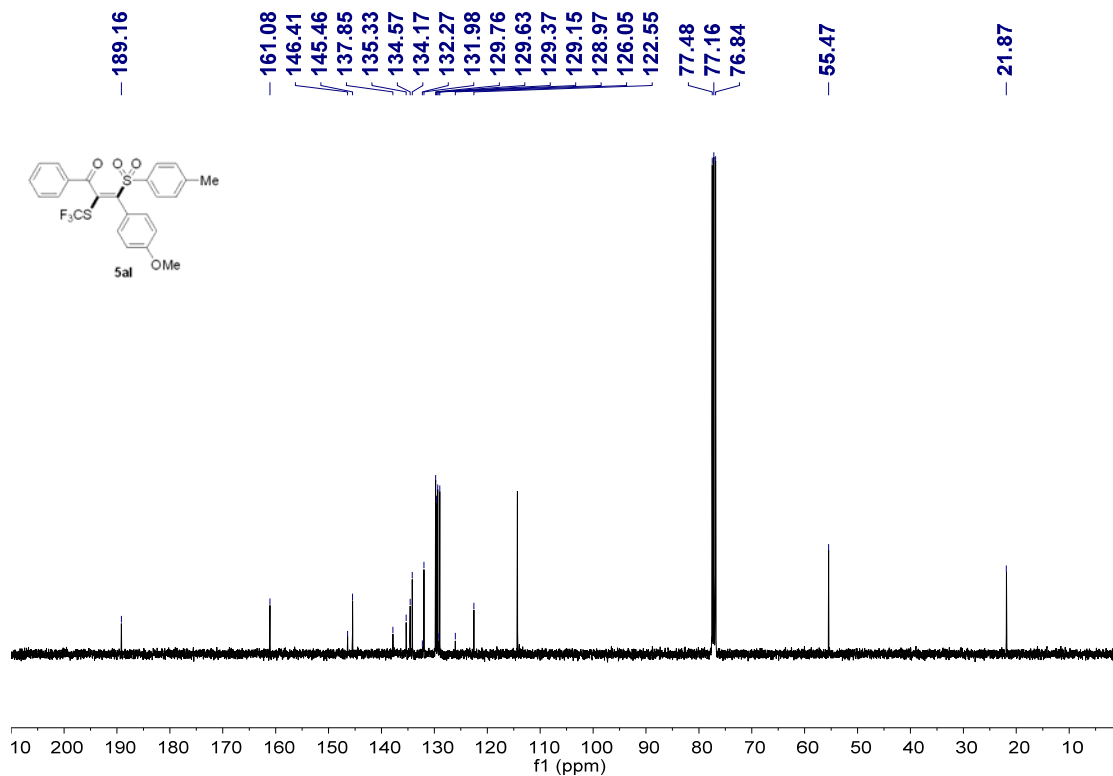

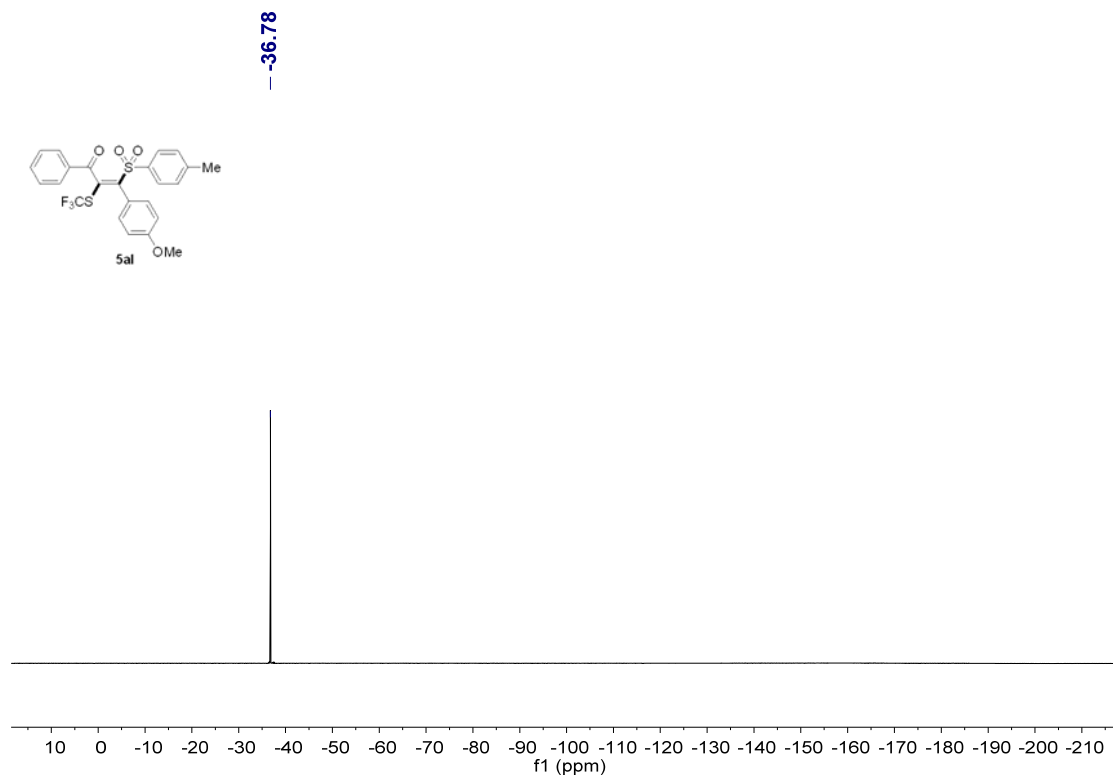

**5am**

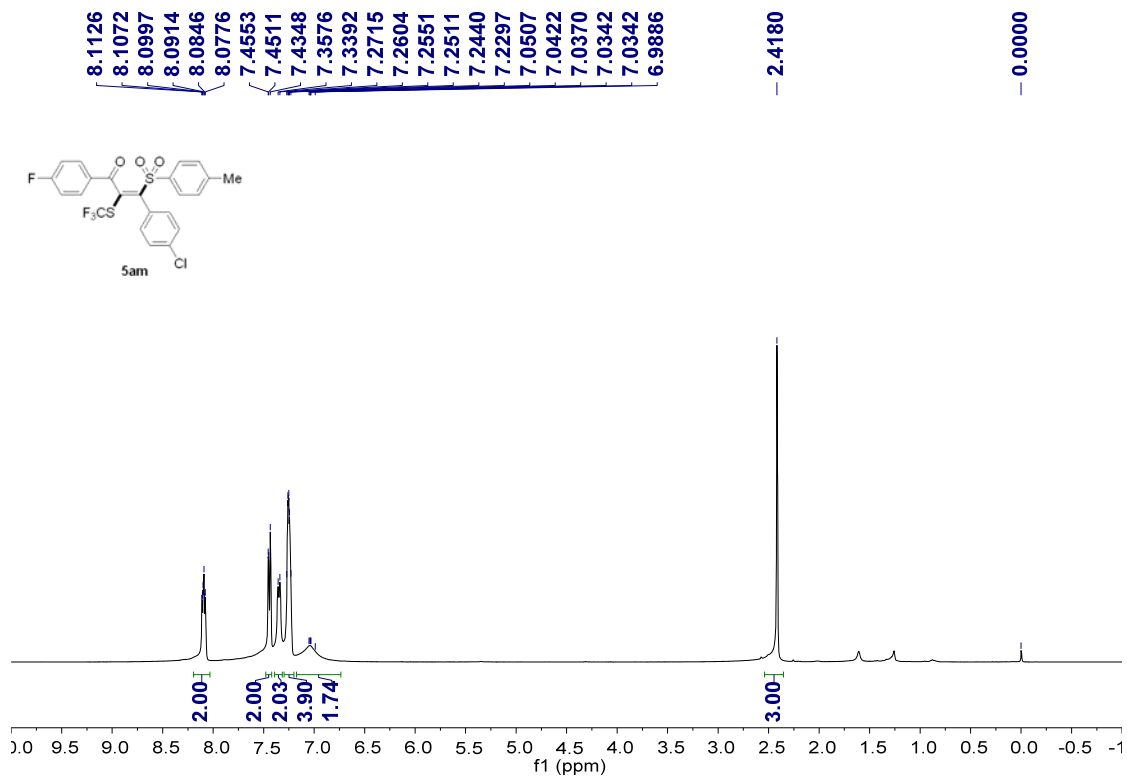

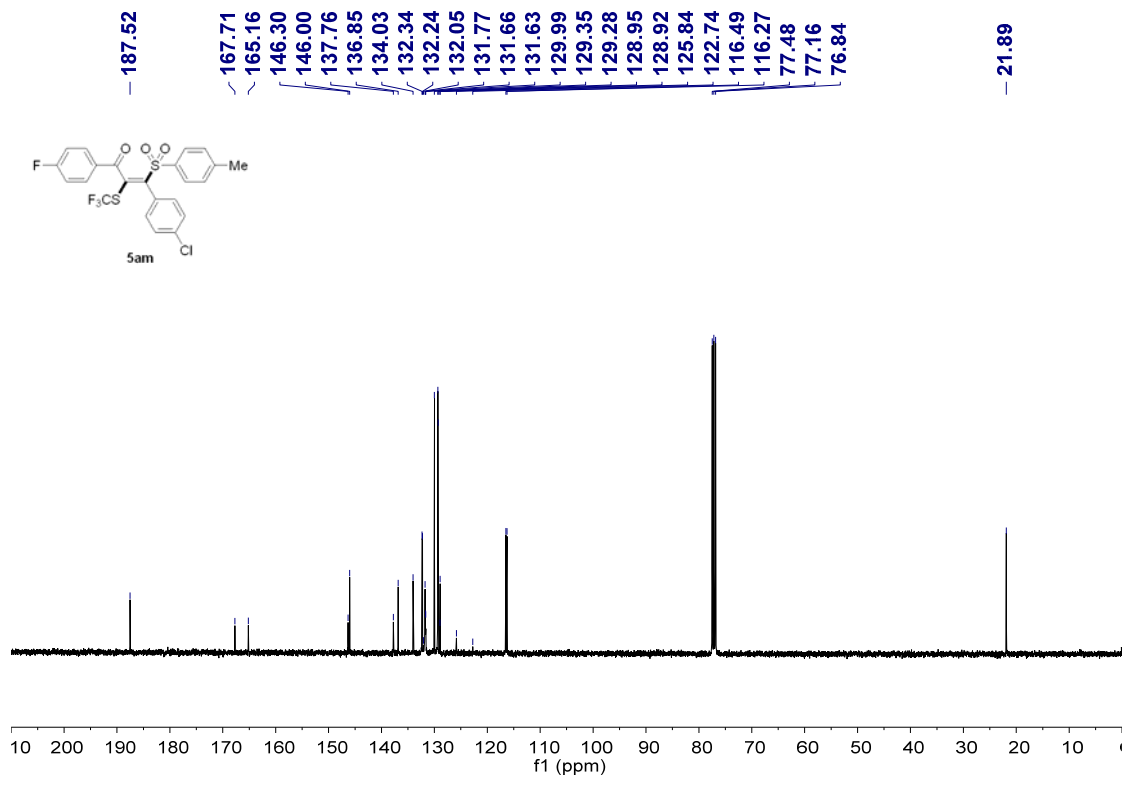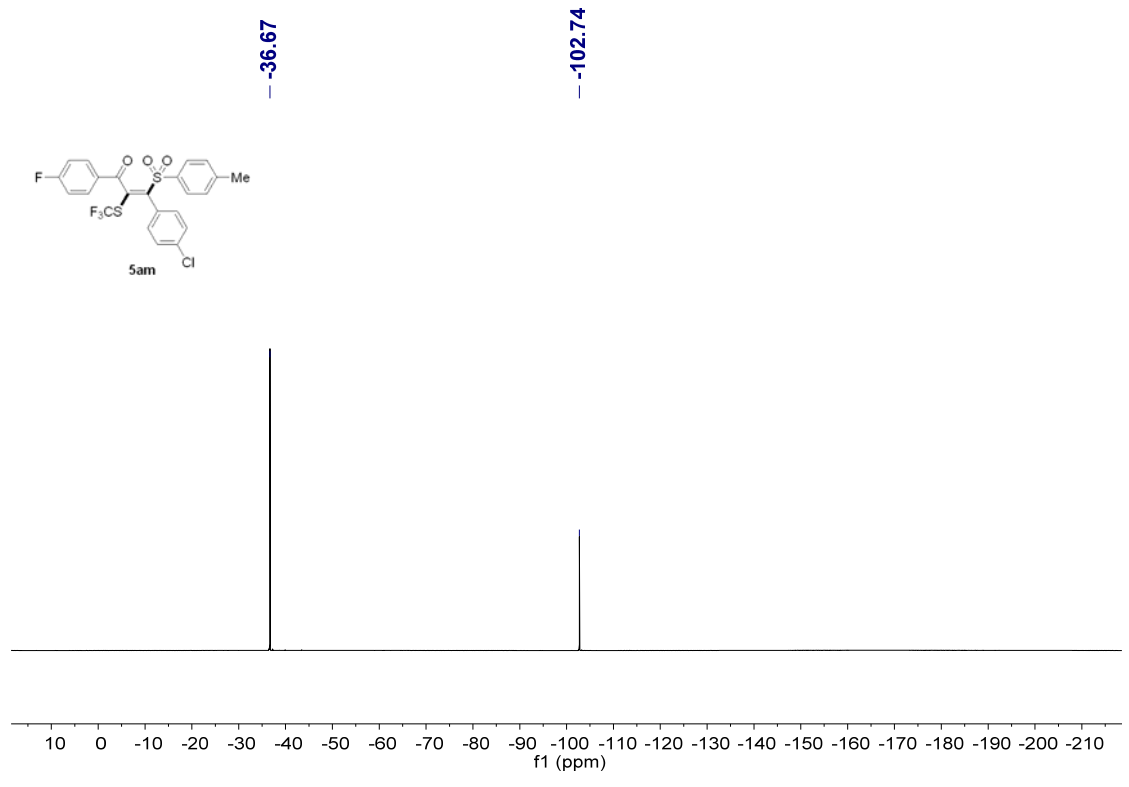

5an

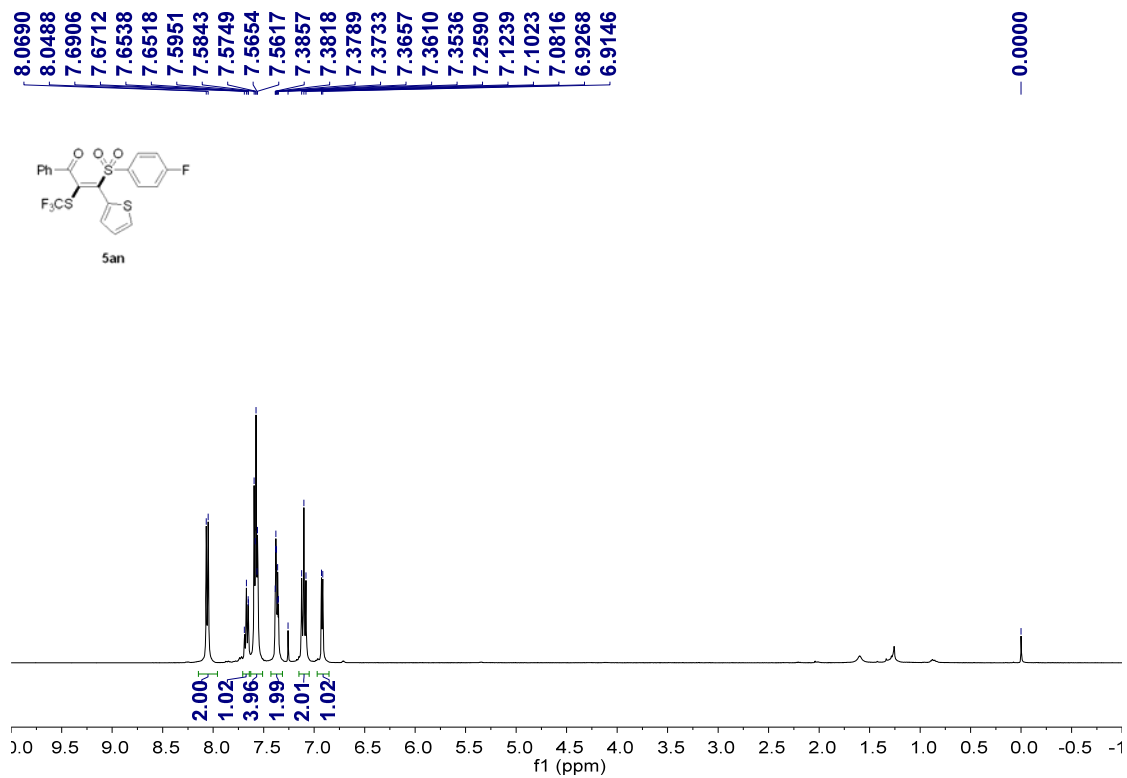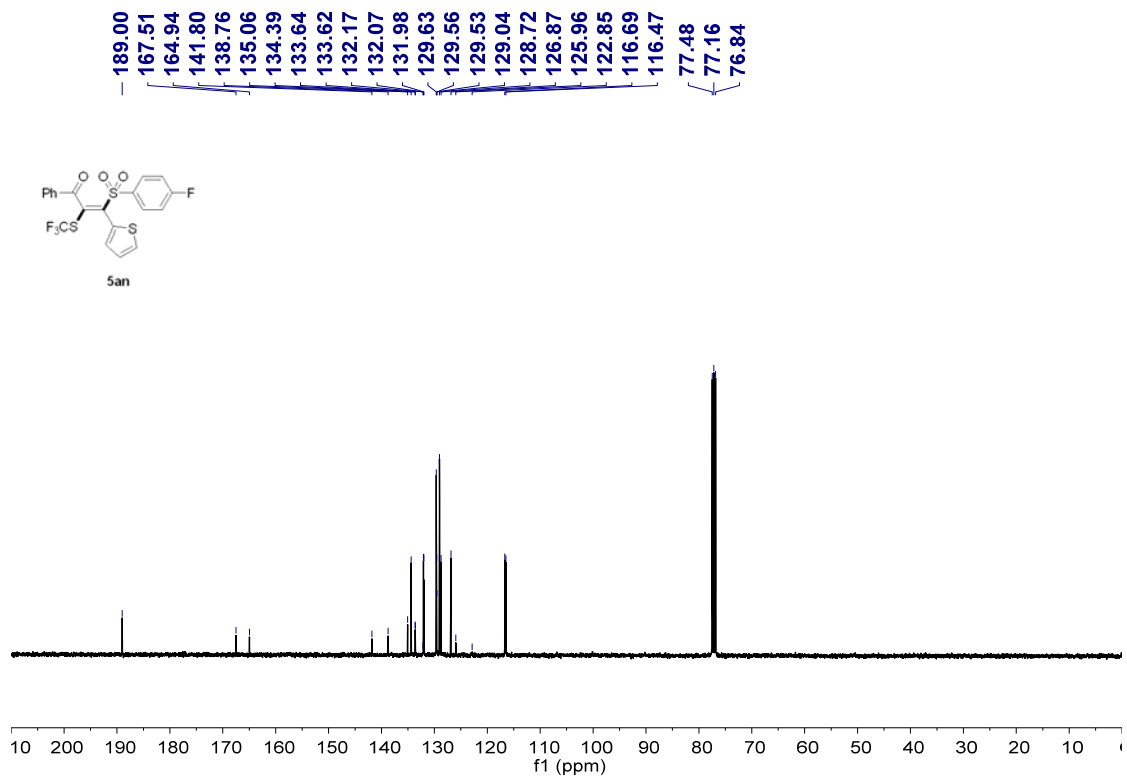

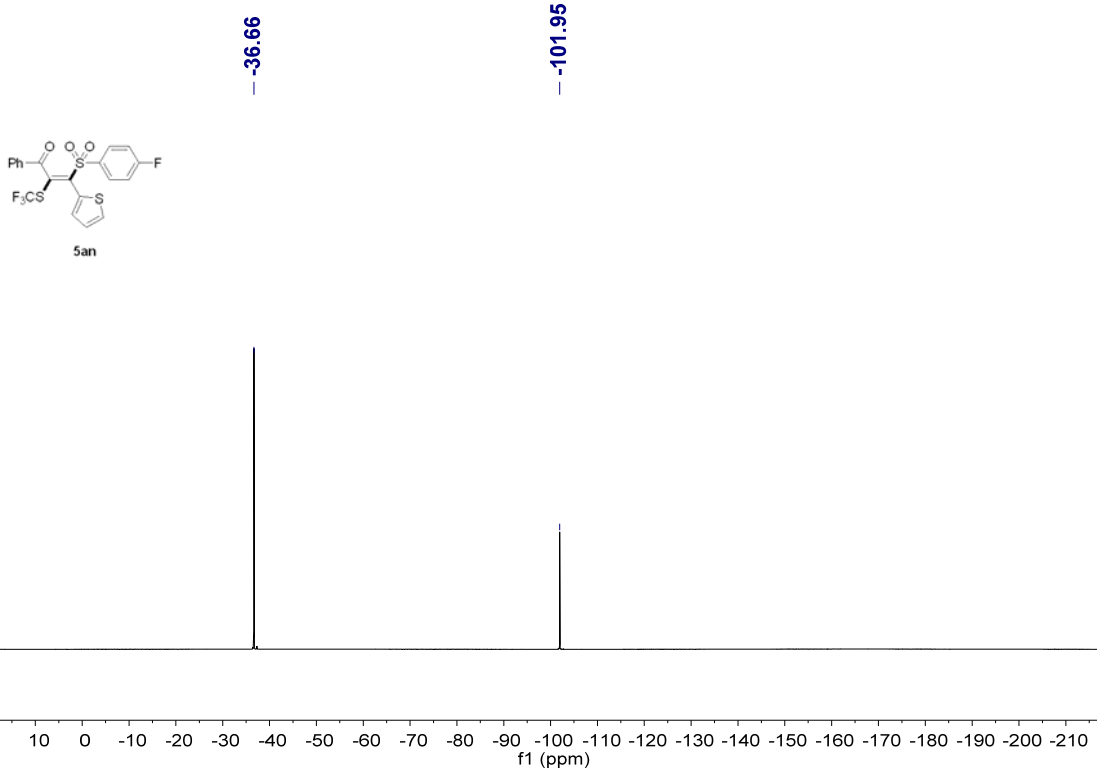

**5ao**

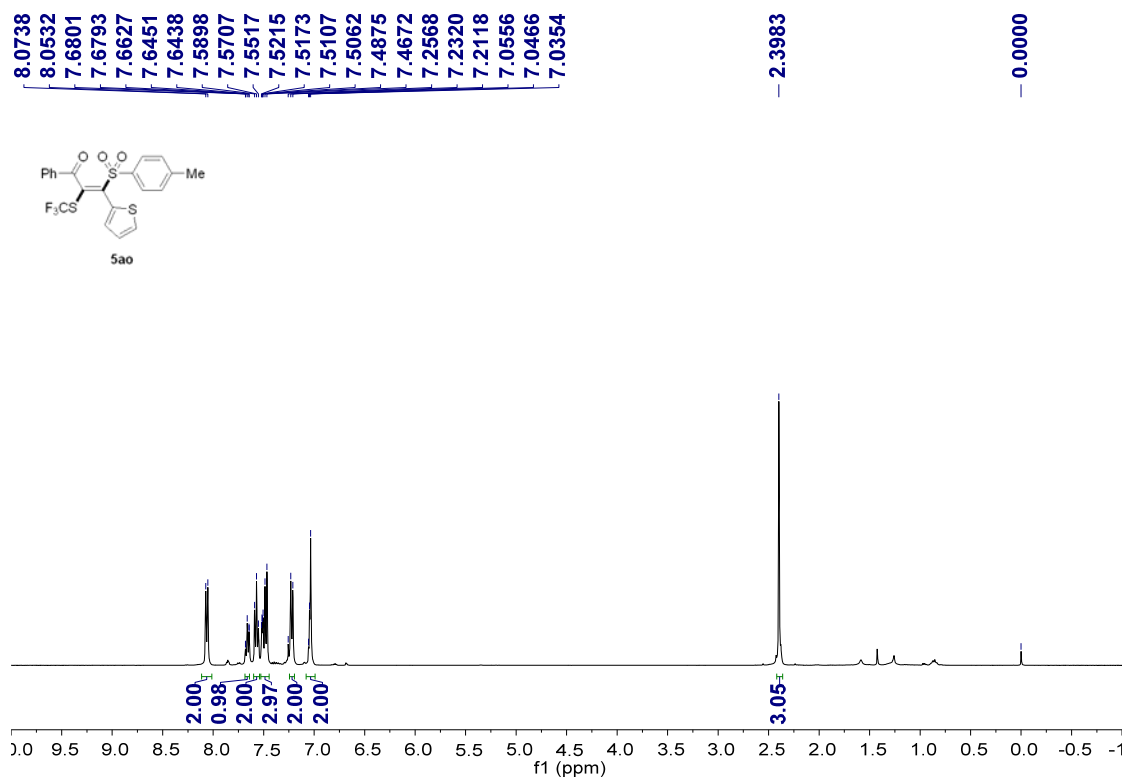

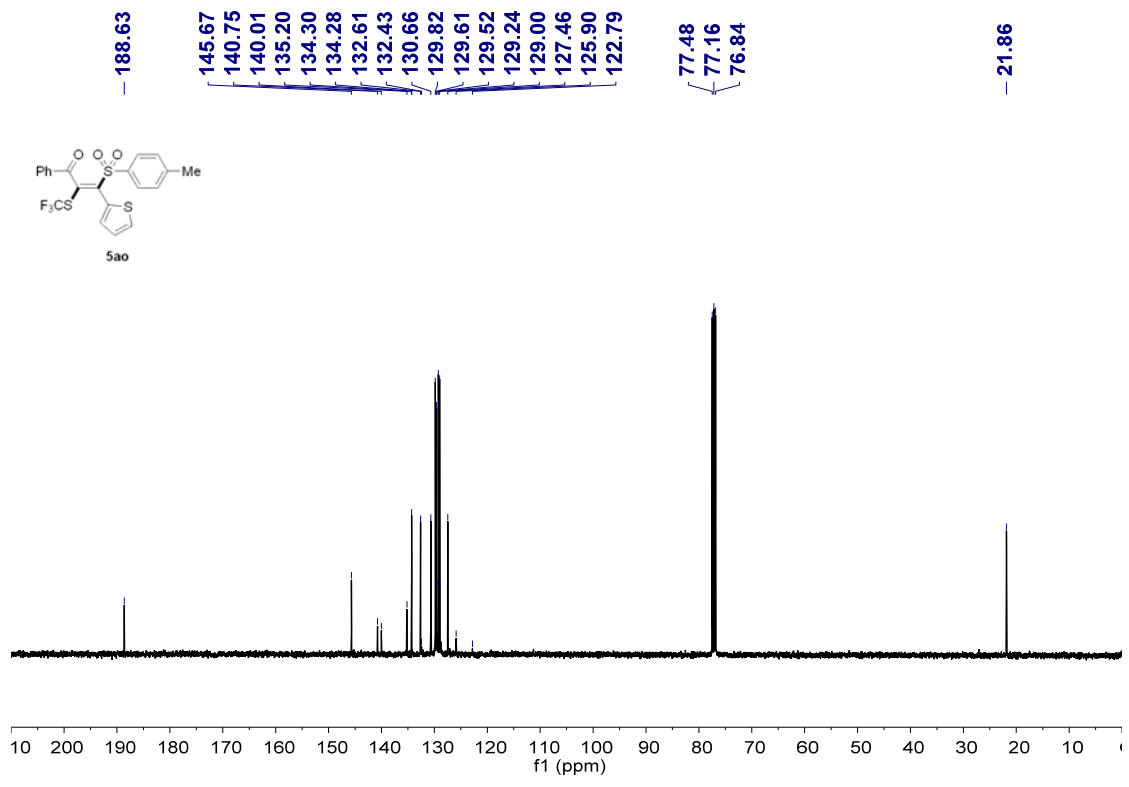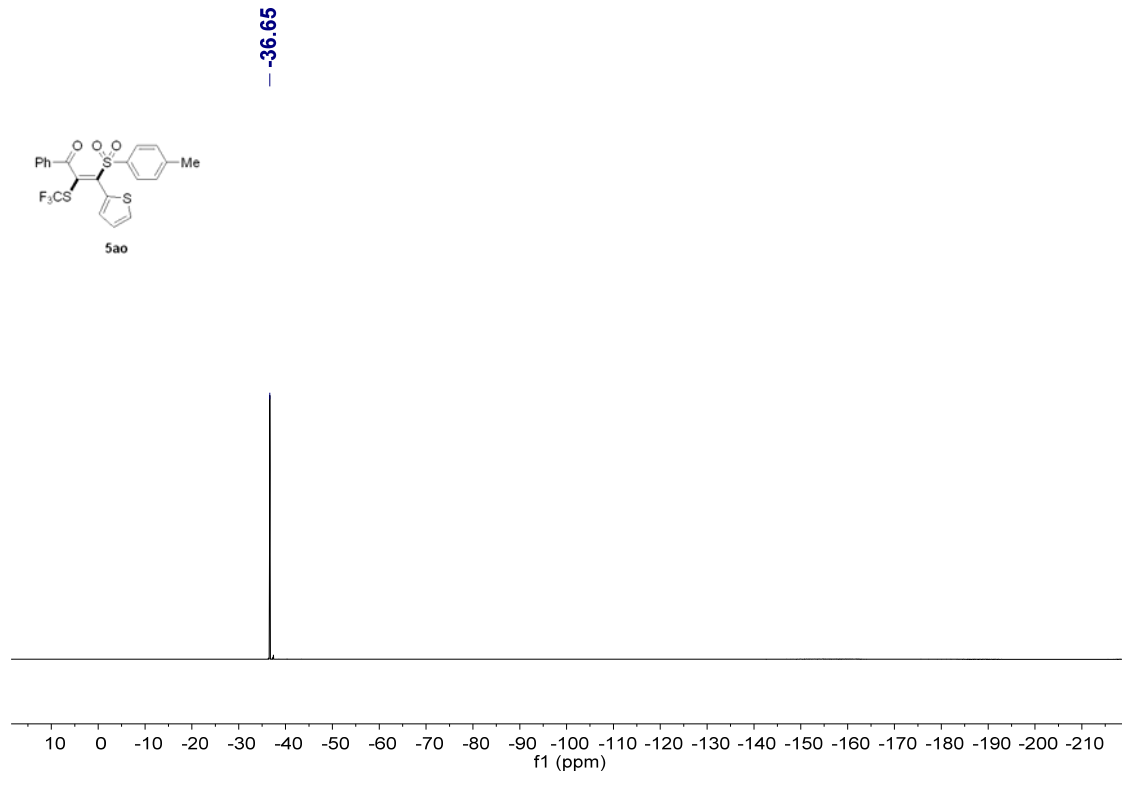



5ap

7.8633  
7.8539  
7.8421  
7.8299  
7.5036  
7.4825  
7.4549  
7.4368  
7.4026  
7.3814  
7.2597  
7.2483  
7.2378  
7.1271  
7.1072  
7.0831  
7.0624  
7.0324  
6.9969  
6.9725  
6.9505  
6.9084  
6.8572

0.0000

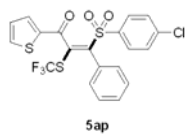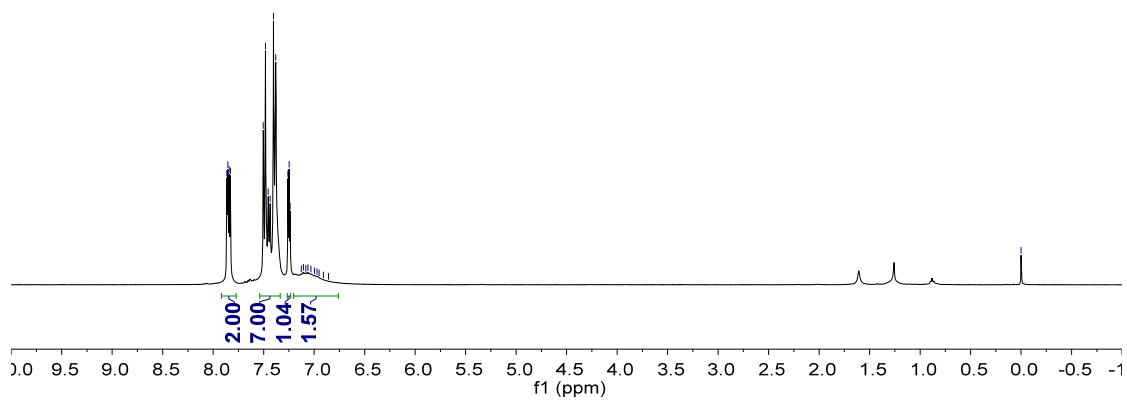

181.01  
146.17  
142.40  
141.34  
138.12  
135.96  
135.90  
135.08  
132.10  
130.79  
130.55  
130.31  
129.48  
129.02  
128.62  
125.89  
122.82  
77.48  
77.16  
76.84

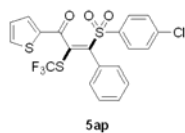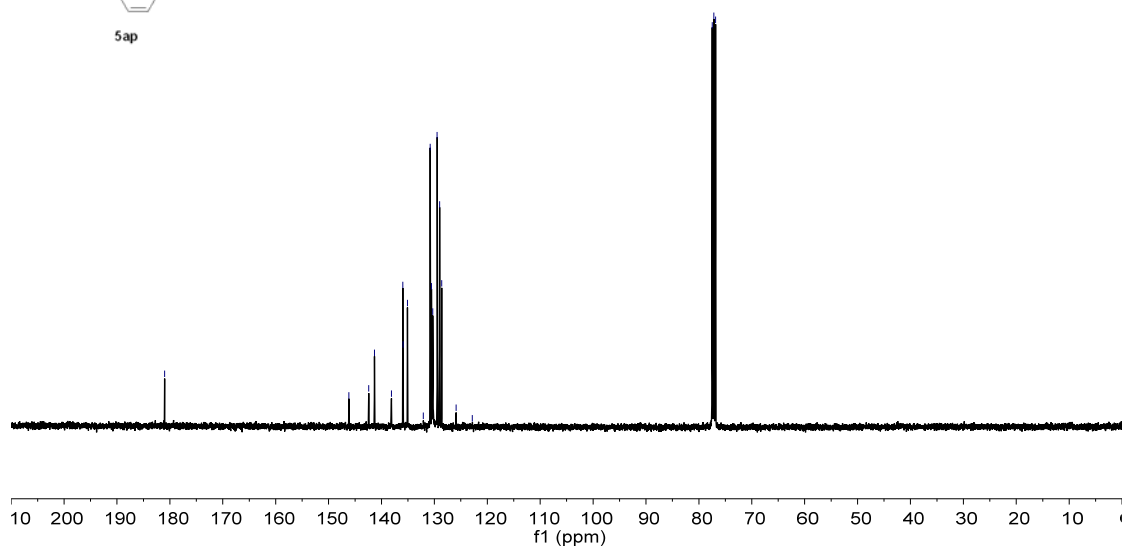

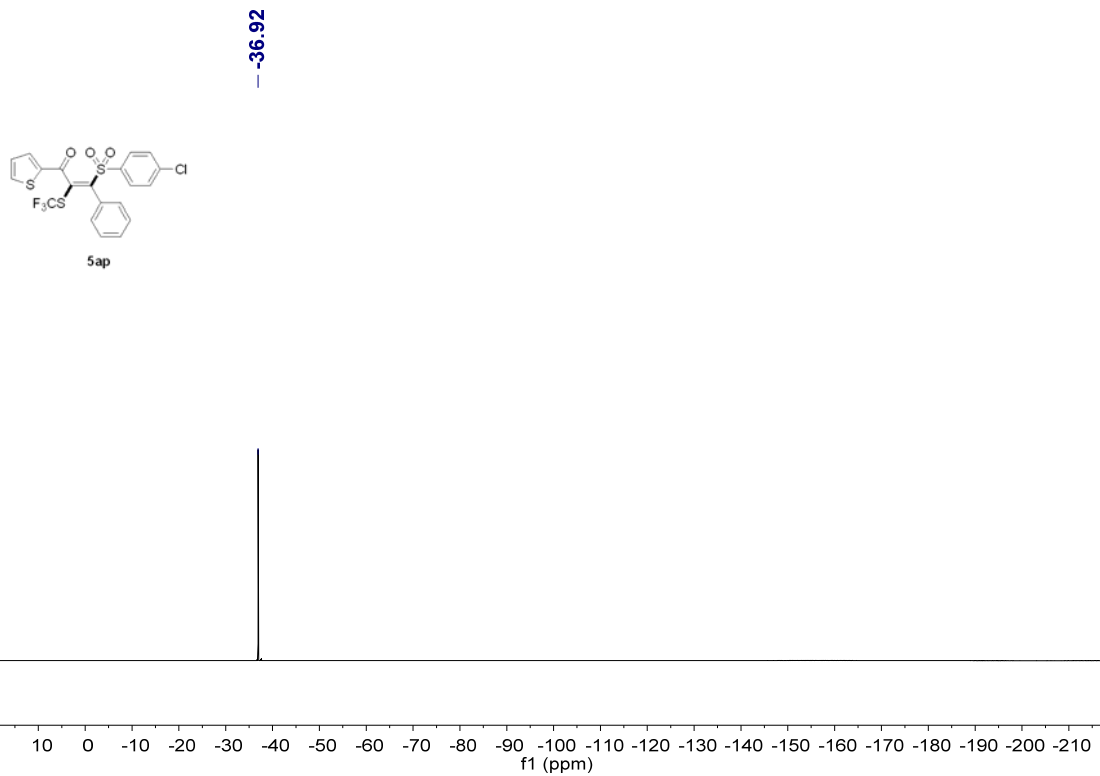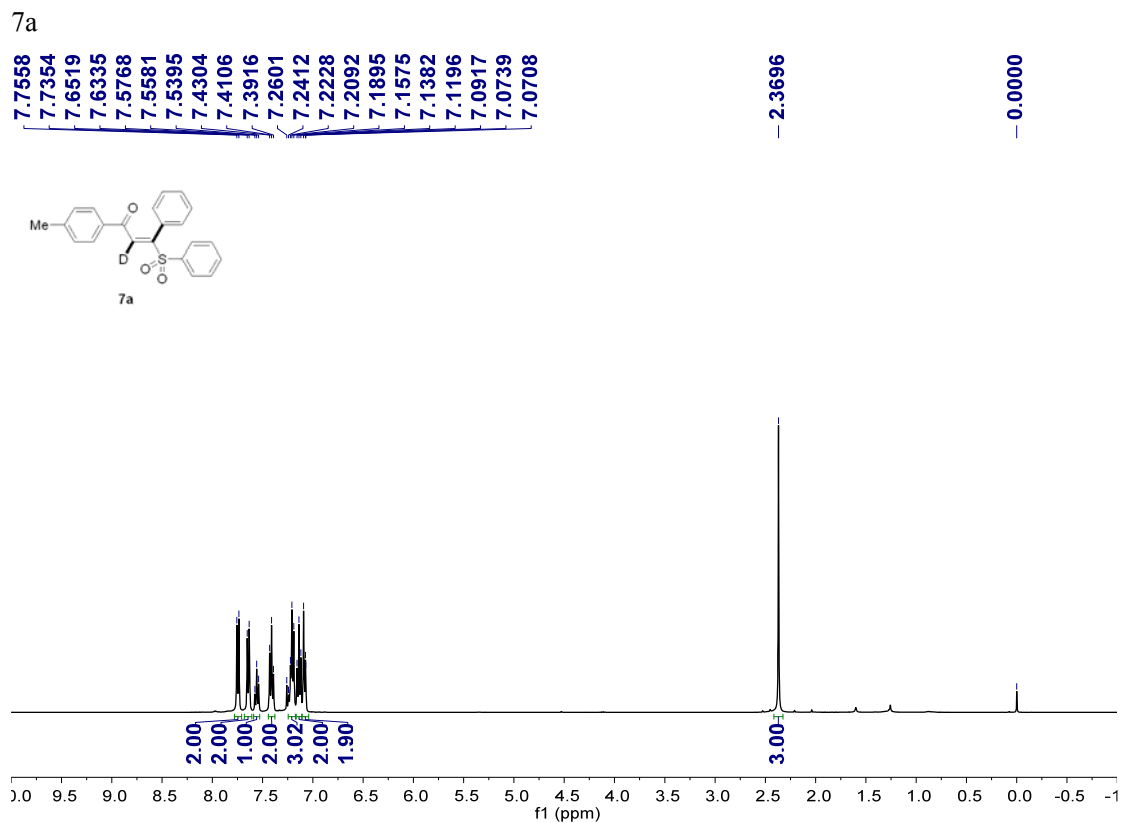

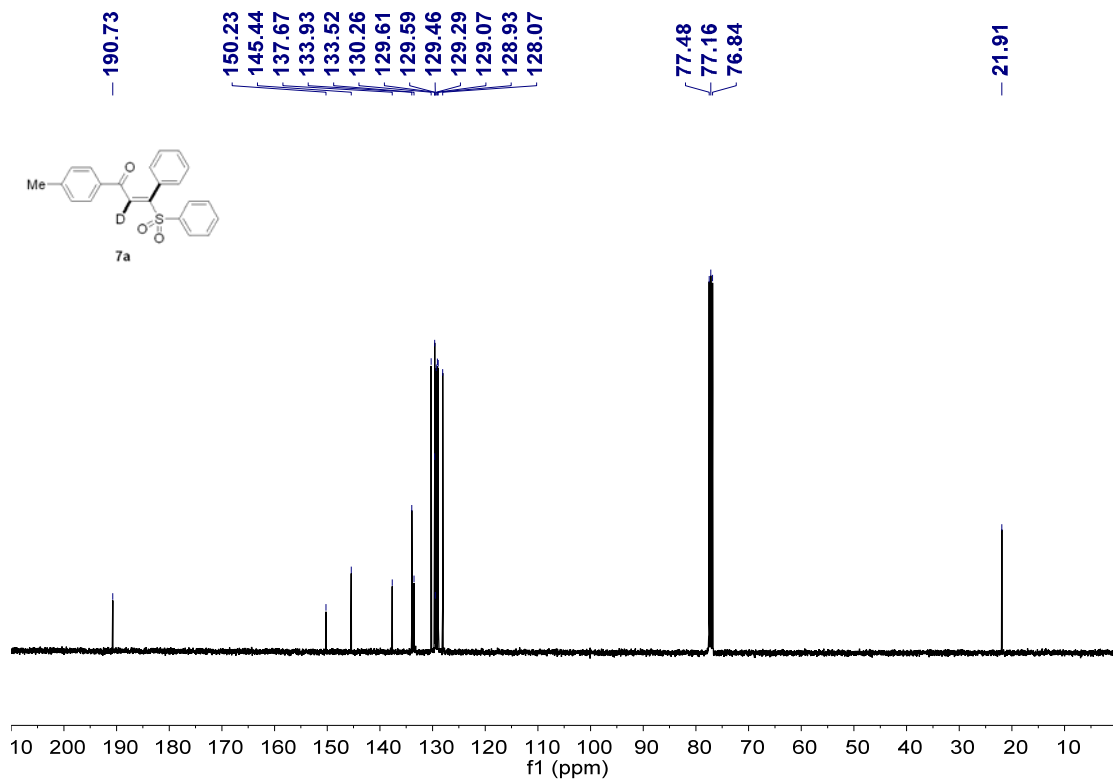

Supplement: d2qo01855a1.pdf [file d2qo01855a1.pdf]
